# Supplementary material for: Construction of multiple bonds via a domino reaction of trifluoroacetimidoyl nitriles with in situ generated bis-nucleophiles
Source: Royal Society of Chemistry journal article supplement (doi:10.1039/d0cc02398a), 2020-01-01

## Supporting Information for

### Construction of multiple bonds via a domino reaction of trifluoroacetimidoyl nitriles with *in-situ* generated bis-nucleophiles

Deng-Yuan Li,<sup>a</sup> Jia-Yan Chen,<sup>a</sup> Da-Fu Feng,<sup>a</sup> Shuang Chen,<sup>a</sup> Xian-Kuan Xu,<sup>a</sup> Li Dang,<sup>b</sup> and Pei-Nian  
Liu<sup>\*,a</sup>

<sup>a</sup>Shanghai Key Laboratory of Functional Materials Chemistry, Key Laboratory for Advanced Materials  
and School of Chemistry and Molecular Engineering, East China University of Science and Technology,  
Meilong Road 130, Shanghai 200237, China

<sup>b</sup>Department of Chemistry and Key Laboratory for Preparation and Application of Ordered Structural  
Materials of Guangdong Province, Shantou University, Guangdong, 515063, China

\*Correspondence and requests for materials should be addressed to Liu PN (e-mail:

liupn@ecust.edu.cn)

#### Table of contents

|                                                                                             |     |
|---------------------------------------------------------------------------------------------|-----|
| 1. General information .....                                                                | S2  |
| 2. General procedure for the double addition/double rearrangement domino reaction.....      | S2  |
| 3. Transformation of product <b>3a</b> .....                                                | S18 |
| 4. Mechanistic studies for the double addition/double rearrangement domino reaction.....    | S19 |
| 5. DFT calculations for the double rearrangement in the domino reaction.....                | S22 |
| 6. Crystal data and structure refinement of product <b>3m</b> .....                         | S36 |
| 7. Copies of the <sup>1</sup> H NMR, <sup>13</sup> C NMR, <sup>19</sup> F NMR spectra ..... | S68 |

## 1. General information

All manipulations were carried out under argon atmosphere using standard Schlenk techniques, unless otherwise stated. Solvents were distilled under nitrogen from sodium-benzophenone (THF, Et<sub>2</sub>O, 1,4-dioxane, toluene, *n*-hexane) or calcium hydride (dichloromethane, MeCN, DCE). Other chemicals were obtained from commercial sources, and were used without further purification. Chemical shifts ( $\delta$ , ppm) in the <sup>1</sup>H NMR spectra were recorded using TMS as internal standard or internally referenced to CHCl<sub>3</sub> ( $\delta$  = 7.26 ppm). Chemical shifts in <sup>13</sup>C NMR spectra were internally CHCl<sub>3</sub> ( $\delta$  = 77.16 ppm).

## 2. General procedure for the double addition/double rearrangement domino reaction

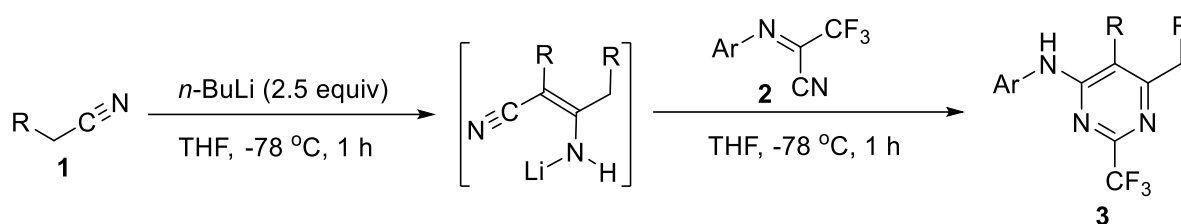

Under argon atmosphere, *n*-BuLi (0.5 mmol, 2.5 M in THF, 0.2 mL) was added dropwise to the THF (1 mL) solution of alkyl nitriles (2 mmol) or alkyl dinitriles (1 mmol) at -78 °C. The reaction mixture was stirred at -78 °C for 1 hour. Then the THF solution of trifluoroacetimidoyl nitriles (0.2 mmol) was added to the above reaction mixture. After 1 hour, the reaction was quenched with water and extracted with EtOAc (3×20 mL). The combined organic layers were dried over anhydrous Na<sub>2</sub>SO<sub>4</sub>, filtered and concentrated at reduced pressure. The purification was performed by flash column chromatography on silica gel (see below for specific eluents) to afford the desired products **3**.

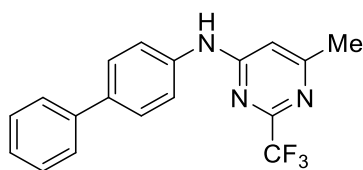

### *N*-([1,1'-Biphenyl]-4-yl)-6-methyl-2-(trifluoromethyl)pyrimidin-4-amine (**3a**)

Following general procedure on 0.2 mmol scale with (*E*)-*N*-([1,1'-biphenyl]-4-yl)-2,2,2-trifluoroacetimidoyl cyanide. Purification by column chromatography (silica gel, 3:1 petroleum ether:EtOAc) afforded 54 mg (82%) of the title compound **3a**.

**Physical state:** white solid.

**Mp:** 137-139 °C.

**<sup>1</sup>H NMR (400 MHz, CDCl<sub>3</sub>, 25 °C):** δ 7.63 (d, *J* = 8.52 Hz, 2H), 7.59 (d, *J* = 7.12 Hz, 2H), 7.43-7.47 (m, 2H), 7.41 (d, *J* = 8.48 Hz, 2H), 7.36 (t, *J* = 7.32 Hz, 1H), 7.17 (s, 1H), 6.67 (s, 1H), 2.44 (s, 3H).

**<sup>13</sup>C NMR (100.6 MHz, CDCl<sub>3</sub>, 25 °C):** δ 167.6, 161.7, 156.5 (q, *J*<sub>C-F</sub> = 35.7 Hz), 140.2, 138.7, 136.6, 129.0, 128.4, 127.6, 127.0, 123.0, 119.7 (q, *J*<sub>C-F</sub> = 276.0 Hz), 104.3, 24.2.

**<sup>19</sup>F NMR (376 MHz, CDCl<sub>3</sub>, 25 °C)** δ -71.0.

**HRMS (EI, TOF):** calcd for C<sub>18</sub>H<sub>14</sub>F<sub>3</sub>N<sub>3</sub><sup>+</sup> [M]<sup>+</sup>: 329.1140, found: 329.1141.

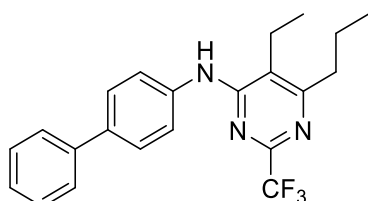

***N*-([1,1'-Biphenyl]-4-yl)-5-ethyl-6-propyl-2-(trifluoromethyl)pyrimidin-4-amine (3b)**

Following general procedure on 0.2 mmol scale with (*E*)-*N*-([1,1'-biphenyl]-4-yl)-2,2,2-trifluoroacetimidoyl cyanide. Purification by column chromatography (silica gel, 10:1 petroleum ether:EtOAc) afforded 35 mg (46%) of the title compound **3b**.

**Physical state:** pale brown oil.

**<sup>1</sup>H NMR (400 MHz, CDCl<sub>3</sub>, 25 °C):** δ 7.57-7.61 (m, 4H), 7.51 (d, *J* = 8.64 Hz, 2H), 7.43-7.47 (m, 2H), 7.36 (t, *J* = 7.36 Hz, 1H), 6.92 (s, 1H), 2.44 (t, *J* = 7.44 Hz, 2H), 2.05 (q, *J* = 7.52 Hz, 2H), 1.60-1.67 (m, 2H), 1.09 (t, *J* = 7.52 Hz, 3H), 0.99 (t, *J* = 7.32 Hz, 3H).

**<sup>13</sup>C NMR (100.6 MHz, CDCl<sub>3</sub>, 25 °C):** δ 166.9, 158.4, 153.3 (q, *J*<sub>C-F</sub> = 35.7 Hz), 140.6, 138.0, 136.7, 128.9, 127.7, 127.2, 126.9, 120.9, 119.9 (q, *J*<sub>C-F</sub> = 275.8 Hz), 118.8, 36.7, 22.7, 19.1, 14.3, 12.5.

**<sup>19</sup>F NMR (565 MHz, CDCl<sub>3</sub>, 25 °C)** δ -70.8.

**HRMS (EI, TOF):** calcd for C<sub>22</sub>H<sub>22</sub>F<sub>3</sub>N<sub>3</sub><sup>+</sup> [M]<sup>+</sup>: 385.1766, found: 385.1769.

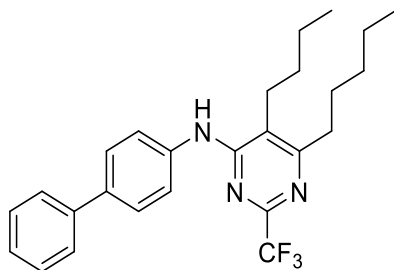

***N*-([1,1'-Biphenyl]-4-yl)-5-butyl-6-pentyl-2-(trifluoromethyl)pyrimidin-4-amine (3c)**

Following general procedure on 0.2 mmol scale with (*E*)-*N*-([1,1'-biphenyl]-4-yl)-2,2,2-trifluoroacetimidoyl cyanide. Purification by column chromatography (silica gel, 10:1 petroleum ether:EtOAc) afforded 46 mg (52%) of the title compound **3c**.

**Physical state:** white solid.

**Mp:** 112-114 °C.

**<sup>1</sup>H NMR (400 MHz, CDCl<sub>3</sub>, 25 °C):** δ 7.75 (d, *J* = 8.64 Hz, 2H), 7.59-7.62 (m, 4H), 7.42-7.46 (m, 2H), 7.33 (t, *J* = 7.32 Hz, 1H), 6.70 (s, 1H), 2.75 (t, *J* = 7.92 Hz, 2H), 2.64 (t, *J* = 7.12 Hz, 2H), 1.68-1.75 (m, 2H), 1.50-1.64 (m, 4H), 1.35-1.43 (m, 4H), 1.04 (t, *J* = 7.16 Hz, 3H), 0.92 (t, *J* = 6.92 Hz, 3H).

**<sup>13</sup>C NMR (100.6 MHz, CDCl<sub>3</sub>, 25 °C):** δ 167.4, 158.5, 153.3 (q, *J*<sub>C-F</sub> = 35.7 Hz), 140.6, 138.0, 136.7, 128.9, 127.8, 127.2, 126.9, 120.8, 120.0 (q, *J*<sub>C-F</sub> = 276.0 Hz), 117.7, 34.9, 32.0, 30.3, 29.0, 25.6, 23.1, 22.7, 14.1, 14.0.

**<sup>19</sup>F NMR (376 MHz, CDCl<sub>3</sub>, 25 °C)** δ -70.8.

**HRMS (EI, TOF):** calcd for C<sub>26</sub>H<sub>30</sub>F<sub>3</sub>N<sub>3</sub><sup>+</sup> [M]<sup>+</sup>: 441.2392, found: 441.2397.

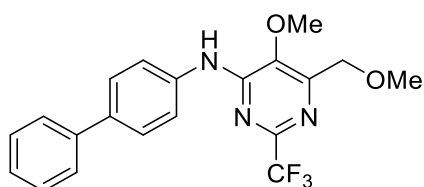

***N*-([1,1'-Biphenyl]-4-yl)-5-methoxy-6-(methoxymethyl)-2-(trifluoromethyl)pyrimidin-4-amine (3d)**

Following general procedure on 0.2 mmol scale with (*E*)-*N*-([1,1'-biphenyl]-4-yl)-2,2,2-trifluoroacetimidoyl cyanide. Purification by column chromatography (silica gel, 5:1 petroleum ether:EtOAc) afforded 61 mg (78%) of the title compound **3d**.

**Physical state:** white solid.

**Mp:** 135-137 °C.

**<sup>1</sup>H NMR (400 MHz, CDCl<sub>3</sub>, 25 °C):** δ 7.56-7.58 (m, 4H), 7.42-7.46 (m, 4H), 7.35 (t, *J* = 7.20 Hz, 1H), 7.06 (s, 1H), 4.15 (s, 2H), 3.66 (s, 3H), 3.41 (s, 3H).

**<sup>13</sup>C NMR (100.6 MHz, CDCl<sub>3</sub>, 25 °C):** δ 140.7 (q, *J*<sub>C-F</sub> = 33.0 Hz), 140.2, 139.7, 138.8, 135.8, 129.0, 127.7, 127.6, 127.0, 122.6, 117.4 (q, *J*<sub>C-F</sub> = 286.0 Hz), 116.9, 114.0, 71.2, 58.8, 58.6.

**<sup>19</sup>F NMR (376 MHz, CDCl<sub>3</sub>, 25 °C)** δ -69.2.

**HRMS (EI, TOF):** calcd for C<sub>20</sub>H<sub>18</sub>F<sub>3</sub>N<sub>3</sub>O<sub>2</sub><sup>+</sup> [M]<sup>+</sup>: 389.1351, found: 389.1352.

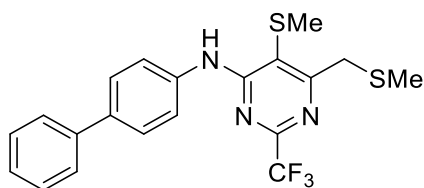

***N*-([1,1'-Biphenyl]-4-yl)-5-(methylthio)-6-((methylthio)methyl)-2-(trifluoromethyl)pyrimidin-4-amine (3e)**

Following general procedure on 0.2 mmol scale with (*E*)-*N*-([1,1'-biphenyl]-4-yl)-2,2,2-trifluoroacetimidoyl cyanide. Purification by column chromatography (silica gel, 5:1 petroleum ether:EtOAc) afforded 41 mg (49%) of the title compound **3e**.

**Physical state:** white solid.

**Mp:** 139-141 °C.

**<sup>1</sup>H NMR (400 MHz, CDCl<sub>3</sub>, 25 °C):** δ 8.53 (s, 1H), 7.81 (d, *J* = 8.68 Hz, 2H), 7.65 (d, *J* = 8.48 Hz, 2H), 7.61 (d, *J* = 7.20 Hz, 2H), 7.45 (t, *J* = 7.40 Hz, 2H), 7.35 (t, *J* = 7.32 Hz, 1H), 4.00 (s, 2H), 2.40 (s, 3H), 2.25 (s, 3H).

**<sup>13</sup>C NMR (100.6 MHz, CDCl<sub>3</sub>, 25 °C):** δ 170.9, 161.0, 154.8 (q, *J*<sub>C-F</sub> = 36.4 Hz), 140.4, 137.3, 137.3, 129.0, 127.8, 127.4, 127.0, 120.8, 119.6 (q, *J*<sub>C-F</sub> = 276.2 Hz), 113.9, 37.8, 18.1, 16.0.

**<sup>19</sup>F NMR (376 MHz, CDCl<sub>3</sub>, 25 °C)** δ -71.2.

**HRMS (EI, TOF):** calcd for C<sub>20</sub>H<sub>18</sub>F<sub>3</sub>N<sub>3</sub>S<sub>2</sub><sup>+</sup> [M]<sup>+</sup>: 421.0894, found: 421.0892.

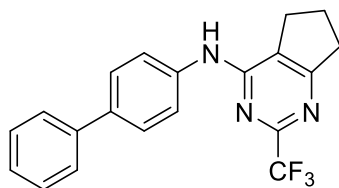

***N*-([1,1'-Biphenyl]-4-yl)-2-(trifluoromethyl)-6,7-dihydro-5H-cyclopenta[*d*]pyrimidin-4-amine (3f)**

Following general procedure on 0.2 mmol scale with (*E*)-*N*-([1,1'-biphenyl]-4-yl)-2,2,2-trifluoroacetimidoyl cyanide. Purification by column chromatography (silica gel, 3:1 petroleum ether:EtOAc) afforded 47 mg (66%) of the title compound **3f**.

**Physical state:** white solid.

**Mp:** 172-174 °C.

**<sup>1</sup>H NMR (400 MHz, CDCl<sub>3</sub>, 25 °C):** δ 7.70 (d, *J* = 8.64 Hz, 2H), 7.59 (d, *J* = 8.60 Hz, 4H), 7.41-7.45 (m, 2H), 7.33 (t, *J* = 7.32 Hz, 1H), 6.53 (s, 1H), 3.01 (t, *J* = 7.72 Hz, 2H), 2.78 (t, *J* = 7.36 Hz, 2H), 2.15-2.23 (m, 2H).

**<sup>13</sup>C NMR (100.6 MHz, CDCl<sub>3</sub>, 25 °C):** δ 173.4, 156.6, 155.1 (q, *J*<sub>C-F</sub> = 35.4 Hz), 140.4, 137.6, 136.9, 130.0, 127.7, 127.3, 126.9, 120.9, 120.1 (q, *J*<sub>C-F</sub> = 275.5 Hz), 119.5, 34.3, 27.2, 21.7.

**<sup>19</sup>F NMR (376 MHz, CDCl<sub>3</sub>, 25 °C)** δ -70.2.

**HRMS (EI, TOF):** calcd for C<sub>20</sub>H<sub>16</sub>F<sub>3</sub>N<sub>3</sub><sup>+</sup> [M]<sup>+</sup>: 355.1296, found: 355.1297.

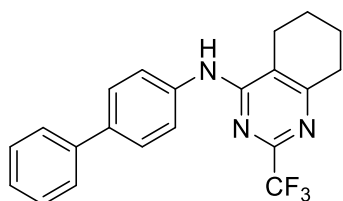

***N*-([1,1'-Biphenyl]-4-yl)-2-(trifluoromethyl)-5,6,7,8-tetrahydroquinazolin-4-amine (3g)**

Following general procedure on 0.2 mmol scale with (*E*)-*N*-([1,1'-biphenyl]-4-yl)-2,2,2-trifluoroacetimidoyl cyanide. Purification by column chromatography (silica gel, 3:1 petroleum ether:EtOAc) afforded 62 mg (84%) of the title compound **3g**.

**Physical state:** white solid.

**Mp:** 150-152 °C.

**<sup>1</sup>H NMR (400 MHz, CDCl<sub>3</sub>, 25 °C):** δ 7.72 (d, *J* = 8.68 Hz, 2H), 7.58 (d, *J* = 8.32 Hz, 4H), 7.40-7.44 (m, 2H), 7.32 (t, *J* = 7.36 Hz, 1H), 6.56 (s, 1H), 2.81 (t, *J* = 6.16 Hz, 2H), 2.49 (t, *J* = 5.60 Hz, 2H), 1.82-1.94 (m, 4H).

**<sup>13</sup>C NMR (100.6 MHz, CDCl<sub>3</sub>, 25 °C):** δ 164.1, 158.4, 152.9 (q, *J*<sub>C-F</sub> = 35.8 Hz), 140.4, 137.7, 136.6, 128.9, 127.6, 127.2, 126.8, 120.8, 120.0 (q, *J*<sub>C-F</sub> = 275.5 Hz), 115.0, 32.1, 22.5, 21.9, 21.8.

**<sup>19</sup>F NMR (376 MHz, CDCl<sub>3</sub>, 25 °C)** δ -70.6.

**HRMS (EI, TOF):** calcd for C<sub>21</sub>H<sub>18</sub>F<sub>3</sub>N<sub>3</sub><sup>+</sup> [*M*]<sup>+</sup>: 369.1453, found: 369.1454.

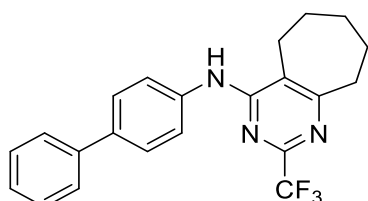

***N*-([1,1'-Biphenyl]-4-yl)-2-(trifluoromethyl)-6,7,8,9-tetrahydro-5H-cyclohepta[*d*]pyrimidin-4-amine (3h)**

Following general procedure on 0.2 mmol scale with (*E*)-*N*-([1,1'-biphenyl]-4-yl)-2,2,2-trifluoroacetimidoyl cyanide. Purification by column chromatography (silica gel, 3:1 petroleum ether:EtOAc) afforded 42 mg (55%) of the title compound **3h**.

**Physical state:** white solid.

**Mp:** 130-132 °C.

**<sup>1</sup>H NMR (600 MHz, CDCl<sub>3</sub>, 25 °C):** δ 7.71 (d, *J* = 8.64 Hz, 2H), 7.60 (d, *J* = 8.52 Hz, 4H), 7.41-7.45 (m, 2H), 7.31-7.35 (m, 1H), 6.82 (s, 1H), 3.01 (t, *J* = 5.70 Hz, 2H), 2.73 (t, *J* = 5.46 Hz, 2H), 1.91-1.95 (m, 2H), 1.73-7.75 (m, 4H).

<sup>13</sup>C NMR (100.6 MHz, CDCl<sub>3</sub>, 25 °C): δ 170.6, 157.6, 152.9 (q, *J*<sub>C-F</sub> = 35.8 Hz), 140.6, 138.0, 136.6, 129.9, 127.7, 127.2, 126.9, 120.8, 120.0, 119.9 (q, *J*<sub>C-F</sub> = 275.6 Hz), 38.2, 31.9, 26.0, 25.4.

<sup>19</sup>F NMR (565 MHz, CDCl<sub>3</sub>, 25 °C): δ -70.7.

HRMS (EI, TOF): calcd for C<sub>22</sub>H<sub>20</sub>F<sub>3</sub>N<sub>3</sub><sup>+</sup> [M]<sup>+</sup>: 383.1609, found: 383.1610.

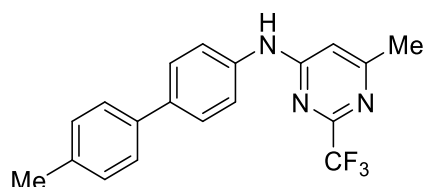

### 6-Methyl-N-(4'-methyl-[1,1'-biphenyl]-4-yl)-2-(trifluoromethyl)pyrimidin-4-amine (3i)

Following general procedure on 0.2 mmol scale with (*E*)-2,2,2-trifluoro-*N*-(4'-methyl-[1,1'-biphenyl]-4-yl)acetimidoyl cyanide. Purification by column chromatography (silica gel, 3:1 petroleum ether:EtOAc) afforded 50 mg (70%) of the title compound **3i**.

**Physical state:** white solid.

**Mp:** 143-145 °C.

<sup>1</sup>H NMR (400 MHz, CDCl<sub>3</sub>, 25 °C): δ 7.61 (d, *J* = 8.52 Hz, 2H), 7.49 (d, *J* = 8.12 Hz, 2H), 7.38 (d, *J* = 8.44 Hz, 2H), 7.26 (d, *J* = 8.00 Hz, 2H), 7.12 (s, 1H), 6.66 (s, 1H), 2.44 (s, 3H), 2.40 (s, 3H).

<sup>13</sup>C NMR (100.6 MHz, CDCl<sub>3</sub>, 25 °C): δ 167.6, 161.8, 156.8 (q, *J*<sub>C-F</sub> = 35.5 Hz), 138.7, 137.5, 137.3, 136.3, 129.8, 128.2, 126.8, 123.1, 119.7 (q, *J*<sub>C-F</sub> = 276.0 Hz), 104.1, 24.2, 21.2.

<sup>19</sup>F NMR (376 MHz, CDCl<sub>3</sub>, 25 °C) δ -71.1.

HRMS (EI, TOF): calcd for C<sub>19</sub>H<sub>16</sub>F<sub>3</sub>N<sub>3</sub><sup>+</sup> [M]<sup>+</sup>: 343.1296, found: 343.1299.

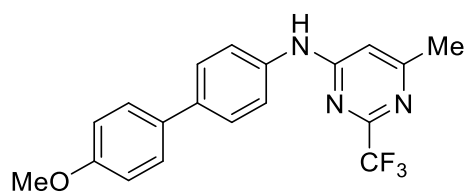

### *N*-(4'-Methoxy-[1,1'-biphenyl]-4-yl)-6-methyl-2-(trifluoromethyl)pyrimidin-4-amine (3j)

Following general procedure on 0.2 mmol scale with (*E*)-2,2,2-trifluoro-*N*-(4'-methoxy-[1,1'-biphenyl]-4-yl)acetimidoyl cyanide. Purification by column chromatography (silica gel, 3:1 petroleum ether:EtOAc) afforded 50 mg (71%) of the title compound **3j**.

**Physical state:** white solid.

**Mp:** 137-139 °C.

**<sup>1</sup>H NMR (400 MHz, CDCl<sub>3</sub>, 25 °C):** δ 7.59 (d, *J* = 8.48 Hz, 2H), 7.53 (d, *J* = 8.72 Hz, 2H), 7.37 (d, *J* = 8.44 Hz, 2H), 7.09 (s, 1H), 6.99 (d, *J* = 8.72 Hz, 2H), 6.66 (s, 1H), 3.86 (s, 3H), 2.45 (s, 3H).

**<sup>13</sup>C NMR (100.6 MHz, CDCl<sub>3</sub>, 25 °C):** δ 167.6, 161.8, 156.5 (q, *J*<sub>C-F</sub> = 35.3 Hz), 138.5, 135.9, 132.7, 128.1, 127.9, 123.3, 119.7 (q, *J*<sub>C-F</sub> = 275.8 Hz), 114.5, 104.1, 55.5, 24.3.

**<sup>19</sup>F NMR (376 MHz, CDCl<sub>3</sub>, 25 °C)** δ -71.1.

**HRMS (EI, TOF):** calcd for C<sub>19</sub>H<sub>16</sub>F<sub>3</sub>N<sub>3</sub>O<sup>+</sup> [M]<sup>+</sup>: 359.1245, found: 359.1244.

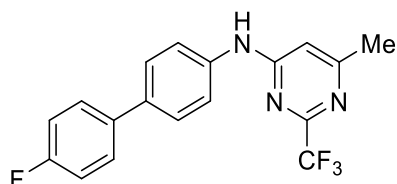

***N*-(4'-Fluoro-[1,1'-biphenyl]-4-yl)-6-methyl-2-(trifluoromethyl)pyrimidin-4-amine (3k)**

Following general procedure on 0.2 mmol scale with (*E*)-2,2,2-trifluoro-*N*-(4'-fluoro-[1,1'-biphenyl]-4-yl)acetimidoyl cyanide. Purification by column chromatography (silica gel, 3:1 petroleum ether:EtOAc) afforded 54 mg (77%) of the title compound **3k**.

**Physical state:** white solid.

**Mp:** 121-123 °C.

**<sup>1</sup>H NMR (400 MHz, CDCl<sub>3</sub>, 25 °C):** δ 7.58 (d, *J* = 8.44 Hz, 2H), 7.54 (dd, *J*<sub>1</sub> = 8.72 Hz, *J*<sub>2</sub> = 5.32 Hz, 2H), 7.42 (d, *J* = 8.44 Hz, 2H), 7.12-7.16 (m, 3H), 6.68 (s, 1H), 2.45 (s, 3H).

**<sup>13</sup>C NMR (100.6 MHz, CDCl<sub>3</sub>, 25 °C):** δ 167.6, 162.6 (d, *J*<sub>C-F</sub> = 246.8 Hz), 161.4, 156.5 (q, *J*<sub>C-F</sub> = 35.7 Hz), 137.6, 136.7, 136.4 (d, *J*<sub>C-F</sub> = 3.0 Hz), 128.6 (d, *J*<sub>C-F</sub> = 8.1 Hz), 128.2, 123.0, 119.7 (q, *J*<sub>C-F</sub> = 276.0 Hz), 115.9 (d, *J*<sub>C-F</sub> = 21.6 Hz), 104.3, 24.2.

**<sup>19</sup>F NMR (376 MHz, CDCl<sub>3</sub>, 25 °C)** δ -71.1 (s, 3F), -115.3 (s, 1F).

**HRMS (EI, TOF):** calcd for C<sub>18</sub>H<sub>13</sub>F<sub>4</sub>N<sub>3</sub><sup>+</sup> [M]<sup>+</sup>: 347.1046, found: 347.1047.

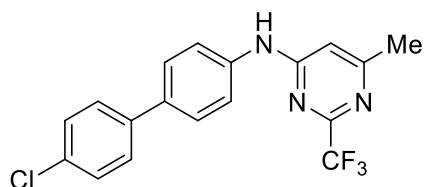

***N*-(4'-Chloro-[1,1'-biphenyl]-4-yl)-6-methyl-2-(trifluoromethyl)pyrimidin-4-amine (3l)**

Following general procedure on 0.2 mmol scale with (*E*)-*N*-(4'-chloro-[1,1'-biphenyl]-4-yl)-2,2,2-trifluoroacetimidoyl cyanide. Purification by column chromatography (silica gel, 3:1 petroleum ether:EtOAc) afforded 61 mg (84%) of the title compound **3l**.



**Physical state:** white solid.

**Mp:** 126-128 °C.

**<sup>1</sup>H NMR (400 MHz, CDCl<sub>3</sub>, 25 °C):** δ 7.49 (d, *J* = 8.56 Hz, 2H), 7.41 (d, *J* = 8.56 Hz, 2H), 7.35 (d, *J* = 8.52 Hz, 2H), 7.31 (d, *J* = 8.56 Hz, 2H), 7.16 (s, 1H), 6.57 (s, 1H), 2.35 (s, 3H).

**<sup>13</sup>C NMR (100.6 MHz, CDCl<sub>3</sub>, 25 °C):** δ 1676, 161.6, 156.4 (q, *J*<sub>C-F</sub> = 35.5 Hz), 138.6, 137.1, 137.0, 133.6, 129.1, 128.2, 128.2, 122.8, 119.7 (q, *J*<sub>C-F</sub> = 276.0 Hz), 104.5, 24.2.

**<sup>19</sup>F NMR (376 MHz, CDCl<sub>3</sub>, 25 °C)** δ -71.0.

**HRMS (EI, TOF):** calcd for C<sub>18</sub>H<sub>13</sub>ClF<sub>3</sub>N<sub>3</sub><sup>+</sup> [M]<sup>+</sup>: 363.0750, found: 363.0752.

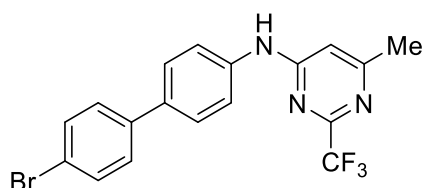

***N*-(4'-Bromo-[1,1'-biphenyl]-4-yl)-6-methyl-2-(trifluoromethyl)pyrimidin-4-amine (3m)**

Following general procedure on 0.2 mmol scale with (*E*)-2,2,2-trifluoro-*N*-(4'-methyl-[1,1'-biphenyl]-4-yl)acetimidoyl cyanide. Purification by column chromatography (silica gel, 3:1 petroleum ether:EtOAc) afforded 65 mg (79%) of the title compound **3m**.

**Physical state:** white solid.

**Mp:** 127-129 °C.

**<sup>1</sup>H NMR (400 MHz, CDCl<sub>3</sub>, 25 °C):** δ 7.56-7.60 (m, 4H), 7.43-7.46 (m, 4H), 7.14 (s, 1H), 6.68 (s, 1H), 2.46 (s, 3H).

**<sup>13</sup>C NMR (100.6 MHz, CDCl<sub>3</sub>, 25 °C):** δ 167.7, 161.6, 156.5 (q, *J*<sub>C-F</sub> = 35.4 Hz), 139.1, 137.2, 137.1, 132.1, 128.6, 128.2, 122.9, 121.8, 119.7 (q, *J*<sub>C-F</sub> = 275.9 Hz), 104.4, 24.3.

**<sup>19</sup>F NMR (376 MHz, CDCl<sub>3</sub>, 25 °C)** δ -71.1.

**HRMS (EI, TOF):** calcd for C<sub>18</sub>H<sub>13</sub>BrF<sub>3</sub>N<sub>3</sub><sup>+</sup> [M]<sup>+</sup>: 407.0245, found: 407.0244.

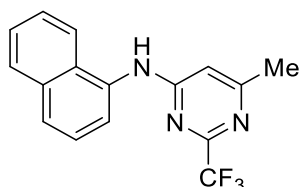

**6-Methyl-*N*-(naphthalen-1-yl)-2-(trifluoromethyl)pyrimidin-4-amine (3n)**

Following general procedure on 0.2 mmol scale with (*E*)-2,2,2-trifluoro-*N*-(naphthalen-1-yl)acetimidoyl cyanide. Purification by column chromatography (silica gel, 3:1 petroleum ether:EtOAc) afforded 45 mg (74%) of the title compound **3n**.

**Physical state:** white solid.

**Mp:** 135-137 °C.

**<sup>1</sup>H NMR (400 MHz, CDCl<sub>3</sub>, 25 °C):** δ 7.96-7.96 (m, 2H), 7.89 (d, *J* = 7.72 Hz, 1H), 7.50-7.60 (m, 4H), 7.33 (s, 1H), 6.23 (s, 1H), 2.32 (s, 3H).

**<sup>13</sup>C NMR (100.6 MHz, CDCl<sub>3</sub>, 25 °C):** δ 137.8, 163.5, 156.5 (q, *J*<sub>C-F</sub> = 35.4 Hz), 134.8, 132.7, 129.9, 128.8, 128.3, 127.3, 127.0, 125.9, 123.9, 122.2, 119.8 (q, *J*<sub>C-F</sub> = 276.0 Hz), 103.6, 24.2.

**<sup>19</sup>F NMR (376 MHz, CDCl<sub>3</sub>, 25 °C)** δ -71.0.

**HRMS (EI, TOF):** calcd for C<sub>16</sub>H<sub>12</sub>F<sub>3</sub>N<sub>3</sub><sup>+</sup> [M]<sup>+</sup>: 303.0983, found: 303.0981.

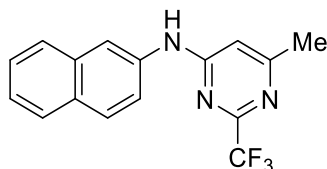

### 6-Methyl-*N*-(naphthalen-2-yl)-2-(trifluoromethyl)pyrimidin-4-amine (**3o**)

Following general procedure on 0.2 mmol scale with (*E*)-2,2,2-trifluoro-*N*-(naphthalen-1-yl)acetimidoyl cyanide. Purification by column chromatography (silica gel, 3:1 petroleum ether:EtOAc) afforded 35 mg (58%) of the title compound **3o**.

**Physical state:** white solid.

**Mp:** 135-136 °C.

**<sup>1</sup>H NMR (400 MHz, CDCl<sub>3</sub>, 25 °C):** δ 7.88 (d, *J* = 8.72 Hz, 1H), 7.83-7.85 (m, 2H), 7.81 (d, *J* = 7.96 Hz, 1H), 7.46-7.54 (m, 2H), 7.39 (dd, *J*<sub>1</sub> = 8.72 Hz, *J*<sub>2</sub> = 2.16 Hz, 1H), 7.25 (s, 1H), 6.68 (s, 1H), 2.44 (s, 3H).

**<sup>13</sup>C NMR (100.6 MHz, CDCl<sub>3</sub>, 25 °C):** δ 167.7, 161.9, 156.5 (q, *J*<sub>C-F</sub> = 35.6 Hz), 134.8, 134.0, 131.4, 129.8, 127.9, 127.6, 127.1, 126.0, 122.2, 120.2, 119.7 (q, *J*<sub>C-F</sub> = 276.04 Hz), 104.2, 24.3.

**<sup>19</sup>F NMR (376 MHz, CDCl<sub>3</sub>, 25 °C)** δ -71.1.

**HRMS (EI, TOF):** calcd for C<sub>16</sub>H<sub>12</sub>F<sub>3</sub>N<sub>3</sub><sup>+</sup> [M]<sup>+</sup>: 303.0983, found: 303.0985.

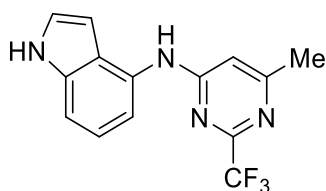

***N*-(6-Methyl-2-(trifluoromethyl)pyrimidin-4-yl)-1*H*-indol-4-amine (3p)**

Following general procedure on 0.2 mmol scale with (*E*)-2,2,2-trifluoro-*N*-(1*H*-indol-4-yl)acetimidoyl cyanide. Purification by column chromatography (silica gel, 3:1 petroleum ether:EtOAc) afforded 35 mg (60%) of the title compound **3p**.

**Physical state:** pale yellow solid.

**Mp:** 133-134 °C.

**<sup>1</sup>H NMR (600 MHz, CDCl<sub>3</sub>, 25 °C):** δ 8.50 (s, 1H), 7.37 (d, *J* = 8.16 Hz, 1H), 7.25-7.26 (m, 2H), 7.23 (d, *J* = 7.92 Hz, 1H), 7.12 (d, *J* = 7.44 Hz, 1H), 6.56 (s, 1H), 6.45 (t, *J* = 2.10 Hz, 1H), 2.38 (s, 3H).

**<sup>13</sup>C NMR (100.6 MHz, CDCl<sub>3</sub>, 25 °C):** δ 167.4, 161.4, 156.4 (q, *J*<sub>C-F</sub> = 35.3 Hz), 137.3, 129.0, 125.0, 123.5, 122.6, 119.8 (q, *J*<sub>C-F</sub> = 276.0 Hz), 115.1, 110.0, 110.0, 100.0, 24.2.

**<sup>19</sup>F NMR (565 MHz, CDCl<sub>3</sub>, 25 °C)** δ -71.0.

**HRMS (EI, TOF):** calcd for C<sub>14</sub>H<sub>11</sub>F<sub>3</sub>N<sub>4</sub><sup>+</sup> [M]<sup>+</sup>: 292.0936, found: 292.0937.

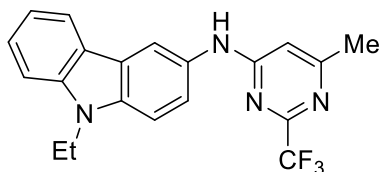

***N*-(6-methyl-2-(trifluoromethyl)pyrimidin-4-yl)-9*H*-carbazol-3-amine (3q)**

Following general procedure on 0.2 mmol scale with (*E*)-*N*-(9-ethyl-9*H*-carbazol-3-yl)-2,2,2-trifluoroacetimidoyl cyanide. Purification by column chromatography (silica gel, 3:1 petroleum ether:EtOAc) afforded 59 mg (80%) of the title compound **3q**.

**Physical state:** white solid.

**Mp:** 158-159 °C.

**<sup>1</sup>H NMR (400 MHz, CDCl<sub>3</sub>, 25 °C):** δ 7.97 (d, *J* = 7.8 Hz, 1H), 7.90 (d, *J* = 1.00 Hz, 1H), 7.40-7.44 (m, 1H), 7.35 (d, *J* = 8.32 Hz, 2H), 7.25 (dd, *J*<sub>1</sub> = 8.56 Hz, *J*<sub>2</sub> = 1.92 Hz, 1H), 7.14-7.18 (m, 1H), 7.13 (s, 1H), 6.35 (s, 1H), 4.29 (q, *J* = 7.24 Hz, 2H), 2.27 (s, 3H), 1.36 (t, *J* = 7.20 Hz, 3H).

**<sup>13</sup>C NMR (376 MHz, CDCl<sub>3</sub>, 25 °C):** δ 167.3, 161.5, 156.4 (q, *J*<sub>C-F</sub> = 35.3 Hz), 128.1, 126.6, 123.8, 123.5, 122.4, 120.7, 119.8 (q, *J*<sub>C-F</sub> = 276.0 Hz), 119.4, 117.6, 109.5, 109.0, 103.2, 37.9, 24.2, 13.9.

<sup>19</sup>F NMR (376 MHz, CDCl<sub>3</sub>, 25 °C) δ -71.0.

HRMS (EI, TOF): calcd for C<sub>20</sub>H<sub>17</sub>F<sub>3</sub>N<sub>4</sub><sup>+</sup> [M]<sup>+</sup>: 370.1405, found: 370.1404.

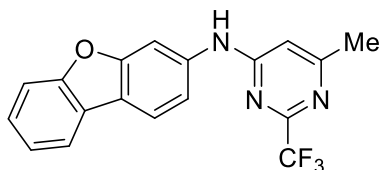

***N*-(Dibenzo[*b,d*]furan-3-yl)-6-methyl-2-(trifluoromethyl)pyrimidin-4-amine (3r)**

Following general procedure on 0.2 mmol scale with (*E*)-*N*-(dibenzo[*b,d*]furan-3-yl)-2,2,2-trifluoroacetimidoyl cyanide. Purification by column chromatography (silica gel, 10:1 petroleum ether:EtOAc) afforded 35 mg (52%) of the title compound **3r**.

**Physical state:** white solid.

**Mp:** 165-166 °C.

<sup>1</sup>H NMR (400 MHz, CDCl<sub>3</sub>, 25 °C): δ 7.94 (d, *J* = 8.20 Hz, 1H), 7.93 (dd, *J*<sub>1</sub> = 7.56 Hz, *J*<sub>2</sub> = 0.56 Hz, 1H), 7.70 (d, *J* = 0.92 Hz, 1H), 7.58 (d, *J* = 8.20 Hz, 2H), 7.45-7.49 (m, 1H), 7.35-7.39 (m, 1H), 7.25 (dd, *J*<sub>1</sub> = 8.28 Hz, *J*<sub>2</sub> = 1.88 Hz, 1H), 7.19 (s, 1H), 6.70 (s, 1H), 2.45 (s, 3H).

<sup>13</sup>C NMR (100.6 MHz, CDCl<sub>3</sub>, 25 °C): δ 167.8, 161.8, 156.8, 156.6 (q, *J*<sub>C-F</sub> = 35.5 Hz), 136.6, 127.3, 123.8, 123.3, 122.1, 121.6, 120.6, 119.7 (q, *J*<sub>C-F</sub> = 276.1 Hz), 117.9, 111.8, 106.3, 104.3, 24.3.

<sup>19</sup>F NMR (376 MHz, CDCl<sub>3</sub>, 25 °C) δ -71.1.

HRMS (EI, TOF): calcd for C<sub>18</sub>H<sub>12</sub>F<sub>3</sub>N<sub>3</sub>O<sup>+</sup> [M]<sup>+</sup>: 343.0932, found: 343.0934.

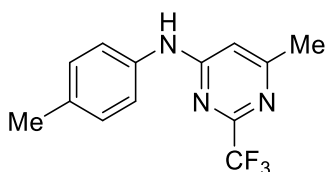

**6-Methyl-*N*-(*p*-tolyl)-2-(trifluoromethyl)pyrimidin-4-amine (3s)**

Following general procedure on 0.2 mmol scale with (*E*)-2,2,2-trifluoro-*N*-(*p*-tolyl)acetimidoyl cyanide. Purification by column chromatography (silica gel, 3:1 petroleum ether:EtOAc) afforded 73 mg (90%) of the title compound **3s**.

**Physical state:** white solid.

**Mp:** 124-126 °C.

<sup>1</sup>H NMR (400 MHz, CDCl<sub>3</sub>, 25 °C): δ 7.18-7.23 (m, 5H), 6.56 (s, 1H), 2.40 (s, 3H), 2.37 (s, 3H).

<sup>13</sup>C NMR (100.6 MHz, CDCl<sub>3</sub>, 25 °C): δ 167.3, 162.2, 156.4 (q, *J*<sub>C-F</sub> = 35.3 Hz), 136.0, 134.5, 130.4, 123.5, 119.7 (q, *J*<sub>C-F</sub> = 275.9 Hz), 103.7, 24.1 (d, *J* = 1.9 Hz), 24.0 (d, *J* = 1.8 Hz).

<sup>19</sup>F NMR (376 MHz, CDCl<sub>3</sub>, 25 °C) δ -71.1.

HRMS (EI, TOF): calcd for C<sub>13</sub>H<sub>12</sub>F<sub>3</sub>N<sub>3</sub><sup>+</sup> [M]<sup>+</sup>: 267.0983, found: 267.0982.

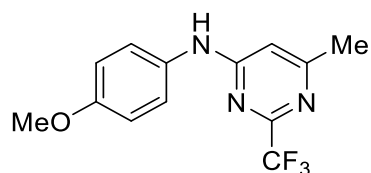

### *N*-(4-Methoxyphenyl)-6-methyl-2-(trifluoromethyl)pyrimidin-4-amine (**3t**)

Following general procedure on 0.2 mmol scale with (*E*)-2,2,2-trifluoro-*N*-(4-methoxyphenyl)acetimidoyl cyanide. Purification by column chromatography (silica gel, 3:1 petroleum ether:EtOAc) afforded 46 mg (82%) of the title compound **3t**.

**Physical state:** white solid.

**Mp:** 115-116 °C.

<sup>1</sup>H NMR (400 MHz, CDCl<sub>3</sub>, 25 °C): δ 7.22 (d, *J* = 8.80 Hz, 2H), 7.04 (s, 1H), 6.96 (d, *J* = 8.88 Hz, 2H), 6.44 (s, 1H), 3.84 (s, 3H), 2.39 (s, 3H).

<sup>13</sup>C NMR (100.6 MHz, CDCl<sub>3</sub>, 25 °C): δ 167.3, 162.8, 158.2, 156.4 (q, *J*<sub>C-F</sub> = 35.4 Hz), 129.8, 126.1, 119.7 (q, *J*<sub>C-F</sub> = 275.9 Hz), 115.1, 103.3, 55.6, 24.2.

<sup>19</sup>F NMR (CDCl<sub>3</sub>, 376 MHz, 25 °C) δ -71.1.

HRMS (EI, TOF): calcd for C<sub>13</sub>H<sub>12</sub>F<sub>3</sub>N<sub>3</sub>O<sup>+</sup> [M]<sup>+</sup>: 283.0932, found: 283.0934.

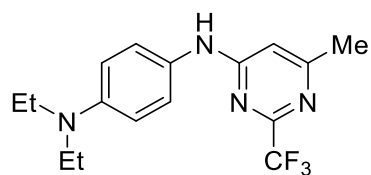

### *N,N'*-Diethyl-*N''*-(6-methyl-2-(trifluoromethyl)pyrimidin-4-yl)benzene-1,4-diamine (**3u**)

Following general procedure on 0.2 mmol scale with (*E*)-*N*-(4-(diethylamino)phenyl)-2,2,2-trifluoroacetimidoyl cyanide. Purification by column chromatography (silica gel, 3:1 petroleum ether:EtOAc) afforded 49 mg (76%) of the title compound **3u**.

**Physical state:** white solid.

**Mp:** 130-132 °C.

**<sup>1</sup>H NMR (400 MHz, CDCl<sub>3</sub>, 25 °C):** δ 7.09 (d, *J* = 8.80 Hz, 2H), 6.94 (s, 1H), 6.69 (d, *J* = 9.00 Hz, 2H), 6.41 (s, 1H), 3.38 (q, *J* = 7.04 Hz, 4H), 2.37 (s, 3H), 1.19 (t, *J* = 7.04 Hz, 6H).

**<sup>13</sup>C NMR (100.6 MHz, CDCl<sub>3</sub>, 25 °C):** δ 167.0, 163.4, 156.3 (q, *J*<sub>C-F</sub> = 35.2 Hz), 146.8, 126.8, 124.3, 119.8 (q, *J*<sub>C-F</sub> = 275.9 Hz), 112.3, 103.0, 44.6, 24.2, 12.6.

**<sup>19</sup>F NMR (376 MHz, CDCl<sub>3</sub>, 25 °C)** δ -71.2.

**HRMS (EI, TOF):** calcd for C<sub>16</sub>H<sub>19</sub>F<sub>3</sub>N<sub>4</sub><sup>+</sup> [M]<sup>+</sup>: 324.1562, found: 324.1561.

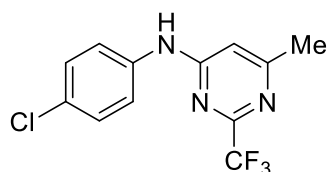

### ***N*-(4-Chlorophenyl)-6-methyl-2-(trifluoromethyl)pyrimidin-4-amine (3v)**

Following general procedure on 0.2 mmol scale with (*E*)-*N*-(4-chlorophenyl)-2,2,2-trifluoroacetimidoyl cyanide. Purification by column chromatography (silica gel, 3:1 petroleum ether:EtOAc) afforded 37 mg (63%) of the title compound **3v**.

**Physical state:** white solid.

**Mp:** 122-124 °C.

**<sup>1</sup>H NMR (400 MHz, CDCl<sub>3</sub>, 25 °C):** δ 7.38 (d, *J* = 8.84 Hz, 2H), 7.32 (d, *J* = 8.80 Hz, 2H), 6.99 (s, 1H), 6.58 (s, 1H), 2.45 (s, 3H).

**<sup>13</sup>C NMR (100.6 MHz, CDCl<sub>3</sub>, 25 °C):** δ 167.8, 161.6, 156.5 (q, *J*<sub>C-F</sub> = 35.8 Hz), 136.1, 131.0, 129.9, 124.0, 119.6 (q, *J*<sub>C-F</sub> = 275.8 Hz), 104.4, 24.3.

**<sup>19</sup>F NMR (376 MHz, CDCl<sub>3</sub>, 25 °C)** δ -71.2.

**HRMS (EI, TOF):** calcd for C<sub>12</sub>H<sub>9</sub>ClF<sub>3</sub>N<sub>3</sub><sup>+</sup> [M]<sup>+</sup>: 287.0437, found: 287.0438.

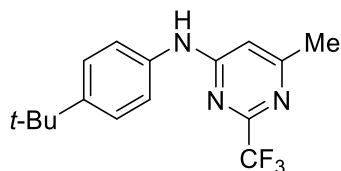

### ***N*-(4-(*tert*-Butyl)phenyl)-6-methyl-2-(trifluoromethyl)pyrimidin-4-amine (3w)**

Following general procedure on 0.2 mmol scale with (*E*)-*N*-(4-(*tert*-butyl)phenyl)-2,2,2-trifluoroacetimidoyl cyanide. Purification by column chromatography (silica gel, 3:1 petroleum ether:EtOAc) afforded 52 mg (84%) of the title compound **3w**.

**Physical state:** white solid.

**Mp:** 116-118 °C.

**<sup>1</sup>H NMR (400 MHz, CDCl<sub>3</sub>, 25 °C):** δ 7.43 (d, *J* = 8.60 Hz, 2H), 7.25 (d, *J* = 8.52 Hz, 2H), 7.10 (s, 1H), 6.62 (s, 1H), 2.42 (s, 3H), 1.34 (s, 9H).

**<sup>13</sup>C NMR (100.6 MHz, CDCl<sub>3</sub>, 25 °C):** δ 167.4, 162.1, 156.4 (q, *J*<sub>C-F</sub> = 35.6 Hz), 149.2, 126.7, 123.0, 119.7 (q, *J*<sub>C-F</sub> = 276.0 Hz), 103.8, 34.7, 31.4, 24.2 (d, *J* = 2.3 Hz).

**<sup>19</sup>F NMR (376 MHz, CDCl<sub>3</sub>, 25 °C)** δ -71.1.

**HRMS (EI, TOF):** calcd for C<sub>16</sub>H<sub>18</sub>F<sub>3</sub>N<sub>3</sub><sup>+</sup> [M]<sup>+</sup>: 309.1453, found: 309.1455.

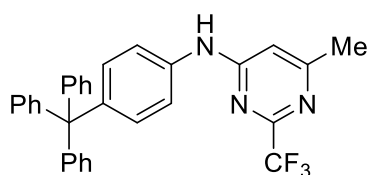

### 6-Methyl-2-(trifluoromethyl)-*N*-(4-tritylphenyl)pyrimidin-4-amine (3x)

Following general procedure on 0.2 mmol scale with (*E*)-*N*-([1,1'-biphenyl]-4-yl)-2,2,2-trifluoroacetimidoyl cyanide. Purification by column chromatography (silica gel, 3:1 petroleum ether:EtOAc) afforded 38 mg (48%) of the title compound **3x**.

**Physical state:** white solid.

**Mp:** 151-153 °C.

**<sup>1</sup>H NMR (400 MHz, CDCl<sub>3</sub>, 25 °C):** δ 7.18-7.29 (m, 19H), 7.03 (s, 1H), 6.67 (s, 1H), 2.44 (s, 3H).

**<sup>13</sup>C NMR (100.6 MHz, CDCl<sub>3</sub>, 25 °C):** δ 167.6, 161.5, 156.5 (q, *J*<sub>C-F</sub> = 35.7 Hz), 146.6, 144.3, 135.2, 132.5, 131.2, 127.7, 126.2, 123.8, 121.2, 119.7 (q, *J*<sub>C-F</sub> = 276.0 Hz), 104.2, 64.8, 24.3.

**<sup>19</sup>F NMR (376 MHz, CDCl<sub>3</sub>, 25 °C)** δ -71.1.

**HRMS (EI, TOF):** calcd for C<sub>31</sub>H<sub>24</sub>F<sub>3</sub>N<sub>3</sub><sup>+</sup> [M]<sup>+</sup>: 495.1922, found: 495.1923.

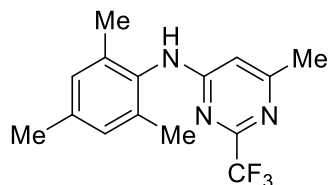

### *N*-Mesityl-6-methyl-2-(trifluoromethyl)pyrimidin-4-amine (3y)

Following general procedure on 0.2 mmol scale with (*E*)-2,2,2-trifluoro-*N*-mesitylacetimidoyl cyanide. Purification by column chromatography (silica gel, 3:1 petroleum ether:EtOAc) afforded 35 mg (59%) of the title compound **3y**.

**Physical state:** white solid.

**Mp:** 127-129 °C.

**<sup>1</sup>H NMR (400 MHz, CDCl<sub>3</sub>, 25 °C):** δ 6.99 (s, 2H), 6.63 (s, 1), 5.83 (s, 1H), 2.35 (s, 3), 2.33 (s, 3H), 2.17 (s, 6H).

**<sup>13</sup>C NMR (100.6 MHz, CDCl<sub>3</sub>, 25 °C):** δ 167.7, 163.1, 156.5 (q,  $J_{C-F}$  = 34.4 Hz), 138.3, 136.6, 130.9, 129.7, 119.8 (q,  $J_{C-F}$  = 275.8 Hz), 102.2, 24.2, 21.1, 18.3.

**<sup>19</sup>F NMR (376 MHz, CDCl<sub>3</sub>, 25 °C)** δ -71.1.

**HRMS (EI, TOF):** calcd for C<sub>15</sub>H<sub>16</sub>F<sub>3</sub>N<sub>3</sub><sup>+</sup> [M]<sup>+</sup>: 295.1296, found: 295.1298.

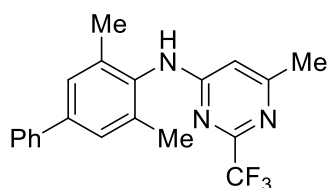

***N*-(3,5-Dimethyl-[1,1'-biphenyl]-4-yl)-6-methyl-2-(trifluoromethyl)pyrimidin-4-amine (3z)**

Following general procedure on 0.2 mmol scale with (*E*)-*N*-(3,5-dimethyl-[1,1'-biphenyl]-4-yl)-2,2,2-trifluoroacetimidoyl cyanide. Purification by column chromatography (silica gel, 3:1 petroleum ether:EtOAc) afforded 46 mg (64%) of the title compound **3z**.

**Physical state:** white solid.

**Mp:** 134-136 °C.

**<sup>1</sup>H NMR (400 MHz, CDCl<sub>3</sub>, 25 °C):** δ 7.60 (d,  $J$  = 7.08 Hz, 2H), 7.44-7.48 (m, 2H), 7.39 (s, 2H), 7.38 (t,  $J$  = 7.40 Hz, 1H), 6.79 (s, 1H), 5.92 (s, 1H), 2.38 (s, 3H), 2.28 (s, 6H).

**<sup>13</sup>C NMR (100.6 MHz, CDCl<sub>3</sub>, 25 °C):** δ 167.8, 162.9, 156.5 (q,  $J_{C-F}$  = 35.3 Hz), 141.3, 140.3, 137.1, 132.8, 129.0, 127.8, 127.2, 122.1, 119.8 (q,  $J_{C-F}$  = 275.9 Hz), 102.4, 24.2, 18.6.

**<sup>19</sup>F NMR (376 MHz, CDCl<sub>3</sub>, 25 °C)** δ -71.0.

**HRMS (EI, TOF):** calcd for C<sub>20</sub>H<sub>18</sub>F<sub>3</sub>N<sub>3</sub><sup>+</sup> [M]<sup>+</sup>: 357.1453, found: 357.1454.

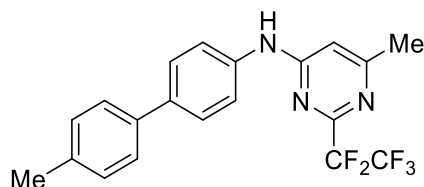

**6-Methyl-*N*-(4'-methyl-[1,1'-biphenyl]-4-yl)-2-(perfluoroethyl)pyrimidin-4-amine (3aa)**

Following general procedure on 0.2 mmol scale with (*E*)-2,2,3,3,3-pentafluoro-*N*-(4'-methyl-[1,1'-biphenyl]-4-yl)propanimidoyl cyanide. Purification by column chromatography (silica gel, 3:1 petroleum ether:EtOAc) afforded 64 mg (63%) of the title compound **3aa**.



**Physical state:** white solid.

**Mp:** 126-128 °C.

**<sup>1</sup>H NMR (400 MHz, CDCl<sub>3</sub>, 25 °C):** δ 7.62 (d, *J* = 8.52 Hz, 2H), 7.49 (d, *J* = 8.08 Hz, 2H), 7.40 (d, *J* = 8.44 Hz, 2H), 7.26 (d, *J* = 8.64 Hz, 2H), 7.05 (s, 1H), 6.67 (s, 1H), 2.45 (s, 3H), 2.40 (s, 3H).

**<sup>13</sup>C NMR (100.6 MHz, CDCl<sub>3</sub>, 25 °C, CF<sub>2</sub>CF<sub>3</sub>- signal is not assigned):** δ 167.6, 161.6, 156.6 (t, *J*<sub>C-F</sub> = 24.8 Hz), 138.6, 137.5, 137.3, 136.3, 129.8, 128.1, 126.8, 123.0, 104.2, 24.3 (d, *J* = 2.5 Hz), 21.2 (d, *J* = 2.2 Hz).

**<sup>19</sup>F NMR (376 MHz, CDCl<sub>3</sub>, 25 °C)** δ -82.2 (s, 3F), 118.1 (s, 2F).

**HRMS (EI, TOF):** calcd for C<sub>20</sub>H<sub>16</sub>F<sub>5</sub>N<sub>3</sub><sup>+</sup> [M]<sup>+</sup>: 393.1264, found: 393.1263.

### 3. Transformation of product 3a

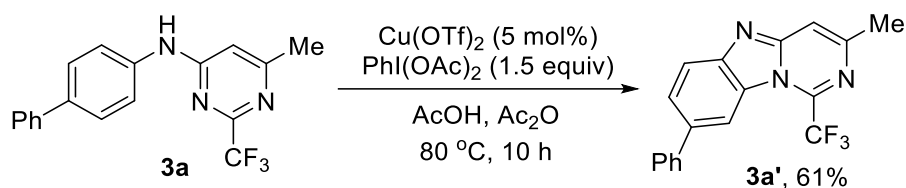

In a 10 mL sealed tube, **3a** (0.2 mmol),  $\text{Cu}(\text{OTf})_2$  (4 mg, 0.01 mmol),  $\text{PhI}(\text{OAc})_2$  (97 mg, 0.3 mmol), then  $\text{AcOH}$  (1.5 mL),  $\text{Ac}_2\text{O}$  (1.5 mL) were added and the reaction mixture was stirred at  $80\text{ }^\circ\text{C}$  for 12 hours. The resulting mixture was cooled to room temperature. After which the mixture was then diluted with brine (10 mL) and extracted with ethyl acetate ( $3 \times 20\text{ mL}$ ). The organic layer was collected and dried over anhydrous  $\text{Na}_2\text{SO}_4$ , filtered and concentrated in vacuo. The crude material was purified by column chromatography on silica gel (PE/EA = 3:1) to give 3-Methyl-8-phenyl-1-(trifluoromethyl)benzo[4,5]imidazo[1,2-c]pyrimidine (**3a'**, 40 mg, 61%).

#### 3-Methyl-8-phenyl-1-(trifluoromethyl)benzo[4,5]imidazo[1,2-c]pyrimidine (**3a'**)

**Physical state:** pale yellow solid.

**Mp:** 151-153  $^\circ\text{C}$ .

**$^1\text{H}$  NMR (400 MHz,  $\text{CDCl}_3$ ,  $25\text{ }^\circ\text{C}$ ):**  $\delta$  8.33 (s, 1H), 8.02 (d,  $J = 8.52\text{ Hz}$ , 1H), 7.88 (dd,  $J_1 = 8.56\text{ Hz}$ ,  $J_2 = 1.36\text{ Hz}$ , 1H), 7.68 (d,  $J = 7.36\text{ Hz}$ , 2H), 7.50-7.54 (m, 3H), 7.41 (t,  $J = 7.36\text{ Hz}$ , 1H), 2.66 (s, 3H).

**$^{13}\text{C}$  NMR (150.6 MHz,  $\text{CDCl}_3$ ,  $25\text{ }^\circ\text{C}$ ):**  $\delta$  150.7, 149.6, 144.6, 141.1, 137.2, 136.9 (q,  $J_{\text{C-F}} = 39.9\text{ Hz}$ ), 129.1, 127.7, 127.6, 127.4, 126.5, 120.5, 118.5 (q,  $J_{\text{C-F}} = 275.7\text{ Hz}$ ), 113.1 (q,  $J_{\text{C-F}} = 6.5\text{ Hz}$ ), 112.7, 23.4.

**$^{19}\text{F}$  NMR (376 MHz,  $\text{CDCl}_3$ ,  $25\text{ }^\circ\text{C}$ )**  $\delta$  -69.1.

**HRMS (EI, TOF):** calcd for  $\text{C}_{18}\text{H}_{12}\text{F}_3\text{N}_3^+$  [ $\text{M}$ ] $^+$ : 327.0983, found: 327.0984.

#### 4. Mechanistic studies for the double addition/double rearrangement domino reaction

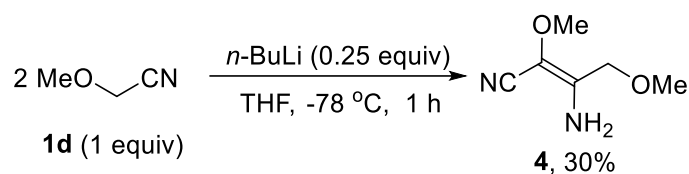

Under argon atmosphere, *n*-BuLi (2 mmol, 2.5 M in THF, 0.8 mL) was added dropwise to the THF (1 mL) solution of 2-methoxyacetonitrile (**1d**, 8 mmol, 569 mg) at -78 °C. The reaction mixture was stirred at -78 °C. After 1 hour, the reaction was quenched with water and extracted with EA (3×20 mL). The combined organic layers were dried over anhydrous Na<sub>2</sub>SO<sub>4</sub>, filtered and concentrated at reduced pressure. The purification was performed by flash column chromatography on silica gel (see below for specific eluents) to afford the desired products **4** (171 mg) in 30% yield.

**Physical state:** pale yellow oil.

##### (*E*)-3-Amino-2,4-dimethoxybut-2-enenitrile (**4**)

<sup>1</sup>H NMR (400 MHz, CDCl<sub>3</sub>, 25 °C): δ 4.50 (br, 2H), 4.12 (s, 2H), 3.65 (s, 3H), 3.37 (s, 3H).

<sup>13</sup>C NMR (100.6 MHz, CDCl<sub>3</sub>, 25 °C): δ 142.9, 116.2, 107.8, 68.4, 59.1, 58.3.

HRMS (EI, TOF): calcd for C<sub>6</sub>H<sub>10</sub>N<sub>2</sub>O<sub>2</sub><sup>+</sup> [M]<sup>+</sup>: 142.0742, found: 142.0743.

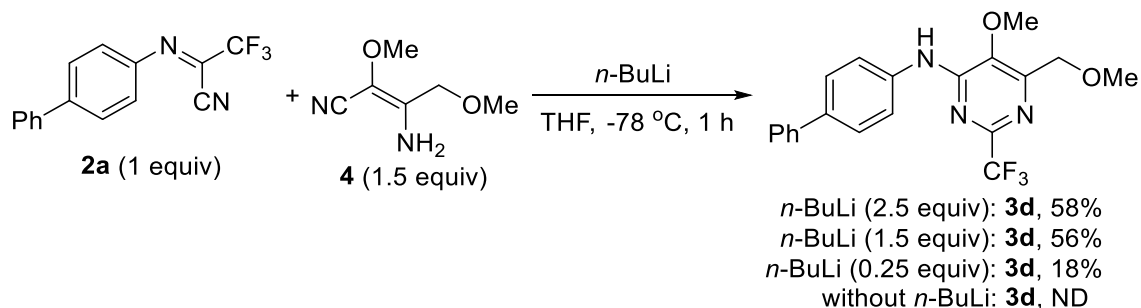

Under argon atmosphere, *n*-BuLi (0.5 mmol, 2.5 M in THF, 0.2 mL) was added dropwise to the THF (1 mL) solution of **4** (0.3 mmol, 43 mg) at -78 °C. The reaction mixture was stirred at -78 °C for 1 hour. Then the THF solution of **2a** (0.2 mmol, 55 mg) was added to the above reaction mixture. After 1 hour, the reaction was quenched with water and extracted with EA (3×20 mL). The combined organic layers were dried over anhydrous Na<sub>2</sub>SO<sub>4</sub>, filtered and concentrated at reduced pressure. The purification was performed by flash column chromatography on silica gel (silica gel, 3:1 petroleum ether:EtOAc) to afford the desired products **3d** (45 mg, 58%).

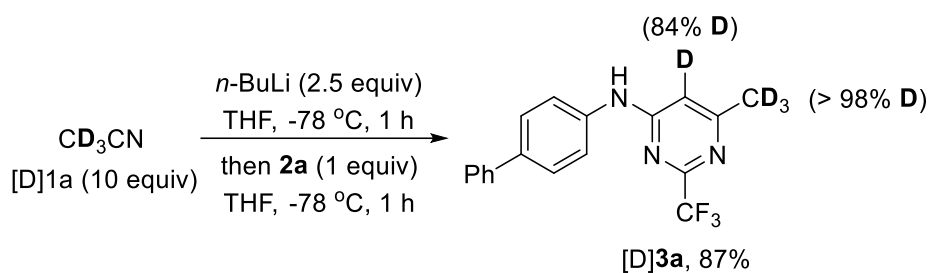

Under argon atmosphere, *n*-BuLi (0.5 mmol, 2.5 M in THF, 0.2 mL) was added dropwise to the THF (1 mL) solution of CD<sub>3</sub>CN (2 mmol, 88 mg) at -78 °C. The reaction mixture was stirred at -78 °C for 1 hour. Then the THF solution of **2a** (0.2 mmol, 55 mg) was added to the above reaction mixture. After 1 hour, the reaction was quenched with water and extracted with EA (3×20 mL). The combined organic layers were dried over anhydrous Na<sub>2</sub>SO<sub>4</sub>, filtered and concentrated at reduced pressure. The purification was performed by flash column chromatography on silica gel (see below for specific eluents) to afford the desired products [D]**3a** (58 mg, 87%). Deuterated ratio of [D]**3a** was determined by <sup>1</sup>H NMR (Figure S1).

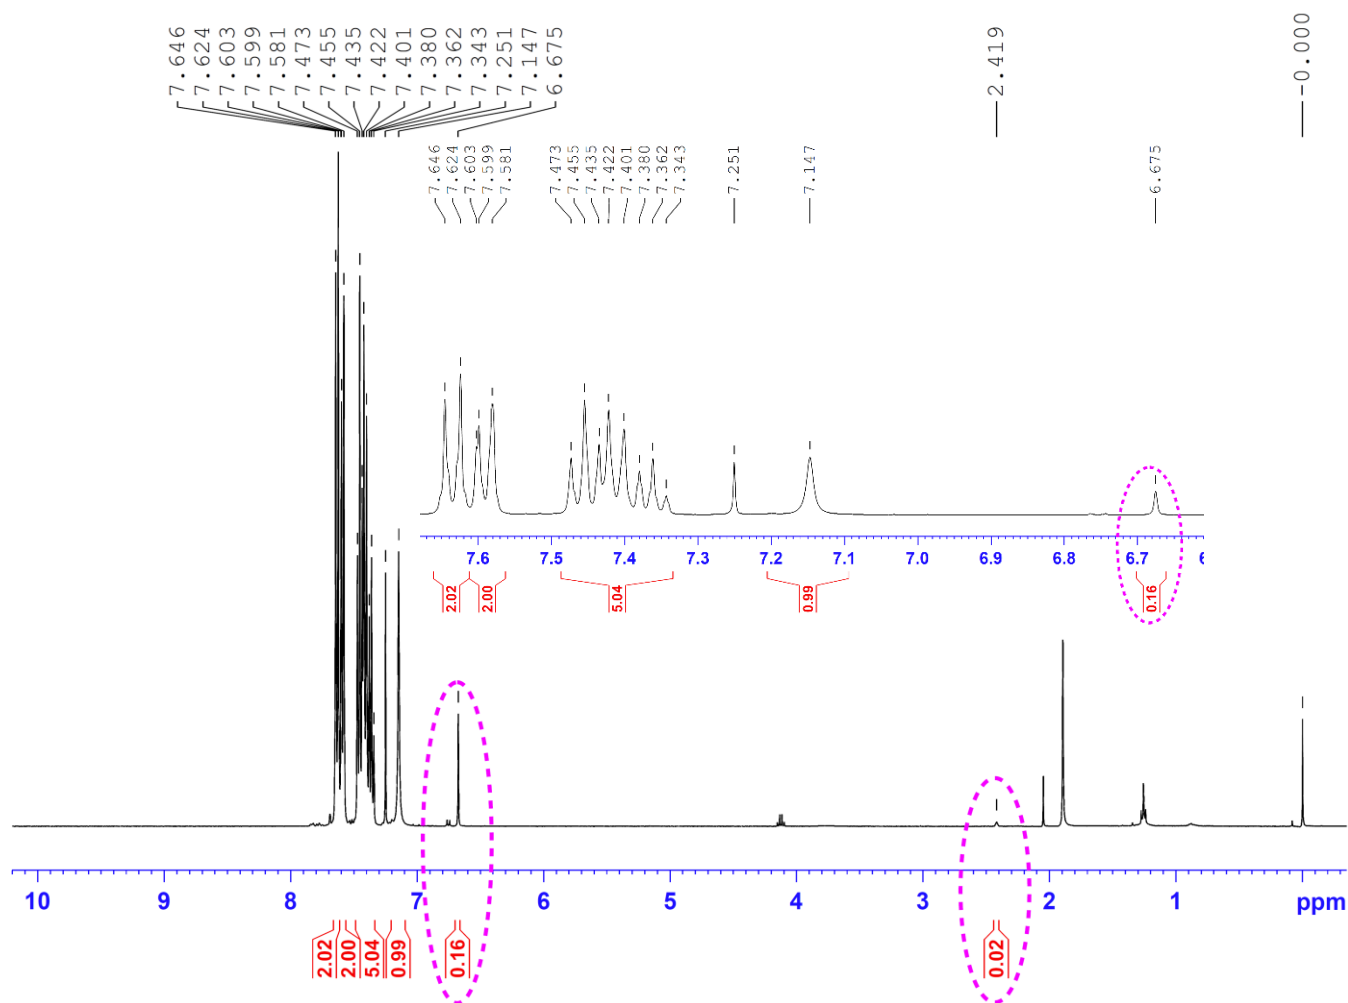

**Figure S1.** <sup>1</sup>H NMR spectra analysis of deuterated products [D]**3a**.

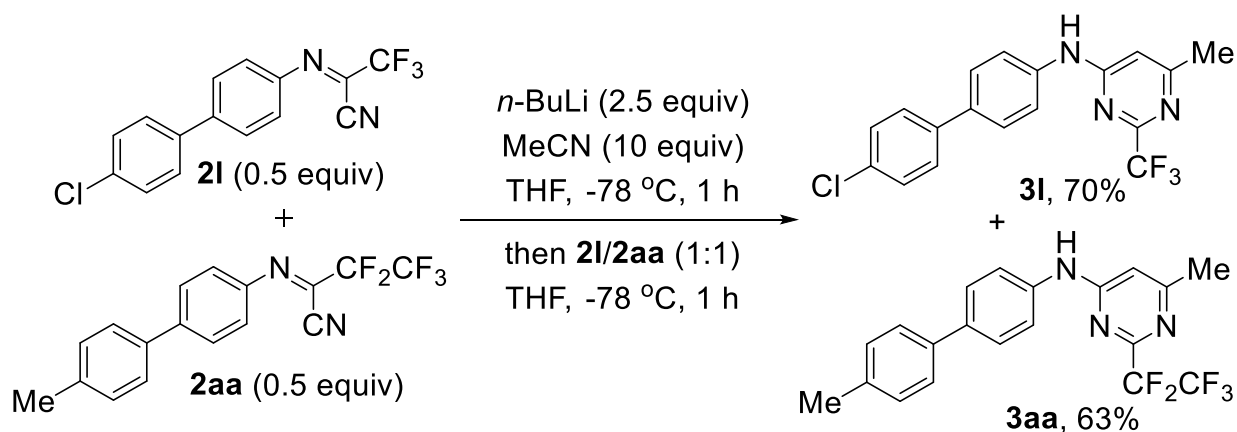

Under argon atmosphere, *n*-BuLi (0.5 mmol, 2.5 M in THF, 0.2 mL) was added dropwise to the THF (1 mL) solution of MeCN (2 mmol, 88 mg) at -78 °C. The reaction mixture was stirred at -78 °C for 1 hour. Then the THF solution of **2I** (0.1 mmol, 31 mg) and **2aa** (0.1 mmol, 34 mg) was added to the above reaction mixture. After 1 hour, the reaction was quenched with water and extracted with EA (3×20 mL). The combined organic layers were dried over anhydrous Na<sub>2</sub>SO<sub>4</sub>, filtered and concentrated at reduced pressure. The purification was performed by flash column chromatography on silica gel (see below for specific eluents) to afford the corresponding products **3I** (25 mg, 70%) and **3aa** (25 mg, 63%).

## 5. DFT calculations for the double rearrangement in the domino reaction

All the DFT calculations were carried out using the GAUSSIAN 09 package [1]. Geometry optimization and energy calculations were performed with WB97XD [2]. The 6-31G basis set was used for all atoms [3-5]. All the reactants and products are calculated with no imaginary frequency and transition state structures have only one imaginary frequency. Solvation energy corrections were calculated using the SMD model with THF as the solvent [6-10]. Computed structures are illustrated using CYLVIEW [11].

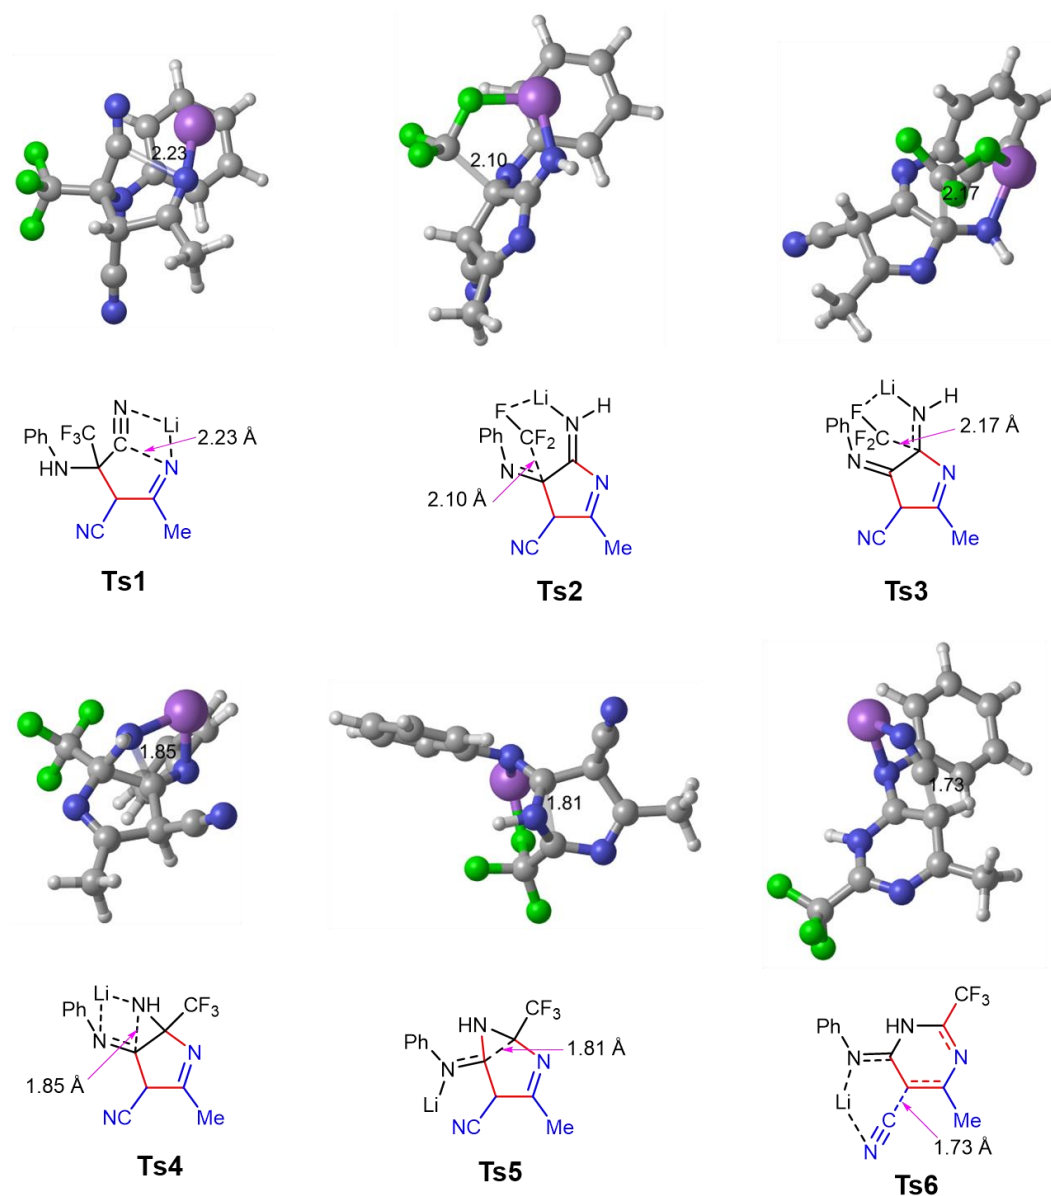

**Figure S2.** The geometry information of transition states **Ts1-Ts6**. The values for bond lengths are given by angstrom.

**Table S1.** Energies, enthalpies, and free energies (in Hartree) of the structures calculated at the WB97XD/LANL2DZ-6-31G (SMD THF).

| <b>Structures</b> | $E_{\text{gas}}$ | $G_{\text{gas}}$ | $E_{\text{sol}}$ | $G_{\text{sol}}$ | Imaginary Frequency |
|-------------------|------------------|------------------|------------------|------------------|---------------------|
| <b>LiCN</b>       | -100.3163148     | -100.330597      | -100.4065115     | -100.4207937     | -                   |
| <b>B</b>          | -1026.8899947    | -1026.720651     | -1027.4190573    | -1027.2497136    | -                   |
| <b>C</b>          | -1026.909536     | -1026.737466     | -1027.447953     | -1027.275881     | -                   |
| <b>D</b>          | -1026.8997637    | -1026.727111     | -1027.444823     | -1027.2721703    | -                   |
| <b>E</b>          | -1026.8896324    | -1026.724526     | -1027.4173244    | -1027.252218     | -                   |
| <b>F</b>          | -1026.9067257    | -1026.735736     | -1027.4431067    | -1027.272117     | -                   |
| <b>G</b>          | -1026.8925912    | -1026.719592     | -1027.4083113    | -1027.2353121    | -                   |
| <b>H</b>          | -1026.9079579    | -1026.738158     | -1027.4496922    | -1027.2798923    | -                   |
| <b>I</b>          | -926.5770108     | -926.411286      | -927.0564089     | -926.8906841     | -                   |
| <b>Ts1</b>        | -1026.8896914    | -1026.719816     | -1027.4186097    | -1027.2487343    | -104.38             |
| <b>Ts2</b>        | -1026.8788834    | -1026.710298     | -1027.4141741    | -1027.2455887    | -211.54             |
| <b>Ts3</b>        | -1026.8803241    | -1026.712048     | -1027.4103399    | -1027.2420638    | -198.33             |
| <b>Ts4</b>        | -1026.8702807    | -1026.698988     | -1027.4165646    | -1027.2452719    | -241.69             |
| <b>Ts5</b>        | -1026.8617964    | -1026.691371     | -1027.4031761    | -1027.2327507    | -446.28             |
| <b>Ts6</b>        | -1026.8860206    | -1026.715088     | -1027.4218309    | -1027.2508983    | -400.29             |

**Table S2.** The  $\Delta E_{gas}$ ,  $\Delta G_{gas}$ ,  $\Delta E_{sol}$ , and  $\Delta G_{sol}$  (kcal/mol) of the species for the double rearrangement in the domino reaction

| Structures | $\Delta E_{gas}$ | $\Delta G_{gas}$ | $\Delta E_{sol}$ | $\Delta G_{sol}$ |
|------------|------------------|------------------|------------------|------------------|
| <b>B</b>   | 0.0              | 0.0              | 0.0              | 0.0              |
| <b>C</b>   | -12.3            | -10.5            | -18.1            | -16.4            |
| <b>D</b>   | -6.1             | -4.1             | -16.2            | -14.1            |
| <b>E</b>   | 0.23             | -8.9             | 1.1              | -1.6             |
| <b>F</b>   | -10.5            | -9.5             | -15.1            | -14.0            |
| <b>G</b>   | -1.6             | 0.7              | 6.7              | 9.0              |
| <b>H</b>   | -11.3            | -11.0            | -19.2            | -18.9            |
| <b>I</b>   | -2.1             | -13.3            | -27.5            | -38.7            |
| <b>Ts1</b> | 0.0              | 0.5              | 0.3              | 0.6              |
| <b>Ts2</b> | 7.0              | 6.5              | 3.1              | 2.6              |
| <b>Ts3</b> | 6.1              | 5.4              | 5.5              | 4.8              |
| <b>Ts4</b> | 12.4             | 13.6             | 1.6              | 2.8              |
| <b>Ts5</b> | 17.7             | 18.4             | 10.0             | 10.6             |
| <b>Ts6</b> | 2.5              | 3.5              | -1.7             | -0.7             |

**WB97XD geometries for all the optimized compounds and transition states**

**LiCN**

|    |            |            |             |
|----|------------|------------|-------------|
| Li | 0.00000000 | 0.00000000 | -2.08404700 |
| C  | 0.00000000 | 0.00000000 | -0.15433400 |
| N  | 0.00000000 | 0.00000000 | 1.02544900  |

**B**

|   |             |             |             |
|---|-------------|-------------|-------------|
| N | 0.31705600  | 1.81400200  | -1.26063400 |
| C | -0.85409000 | 2.04787600  | -0.88088800 |
| C | -1.62077000 | 3.34970800  | -0.97950500 |
| H | -1.03570100 | 4.05840800  | -1.56781700 |
| H | -2.59606000 | 3.20317500  | -1.46101700 |
| H | -1.80580200 | 3.78027700  | 0.01199300  |
| C | -1.72453100 | 0.86621000  | -0.22683800 |
| H | -2.57223700 | 0.65936600  | -0.89262700 |
| C | -2.23271300 | 1.27866900  | 1.07530300  |
| N | -2.57493200 | 1.68093400  | 2.11821100  |
| C | -0.81881500 | -0.39868400 | -0.12421700 |
| N | 0.14311100  | -0.28117300 | 0.96708200  |
| C | -1.66634800 | -1.66955400 | 0.11524900  |
| F | -0.88626300 | -2.81087300 | 0.10169200  |
| F | -2.30951800 | -1.62491200 | 1.33602300  |
| F | -2.64108600 | -1.82682300 | -0.86018100 |



|    |             |             |             |
|----|-------------|-------------|-------------|
| C  | -0.13750300 | -0.57956500 | -1.43417500 |
| N  | 0.31432700  | -1.02165100 | -2.42353400 |
| C  | 1.53794700  | -0.20531600 | 0.76787500  |
| C  | 2.23729900  | -1.24541500 | 0.13383700  |
| C  | 2.23848100  | 0.94662300  | 1.16961900  |
| C  | 3.59988800  | -1.10341300 | -0.14920700 |
| H  | 1.71542200  | -2.15512000 | -0.13501700 |
| C  | 3.60566500  | 1.06717600  | 0.91459100  |
| H  | 1.69577500  | 1.76140400  | 1.63647800  |
| C  | 4.28982300  | 0.05168100  | 0.23397500  |
| H  | 4.12301200  | -1.90928800 | -0.65204800 |
| H  | 4.13019600  | 1.96326000  | 1.22741400  |
| H  | 5.34825300  | 0.15297400  | 0.02252100  |
| H  | -0.21043400 | 0.24879900  | 1.75286800  |
| Li | 1.87214900  | 0.93982100  | -1.54738200 |

|          |             |             |             |
|----------|-------------|-------------|-------------|
| <b>C</b> |             |             |             |
| C        | -0.41752400 | -0.51256000 | 1.37854200  |
| C        | -2.39405700 | -1.32286000 | 0.60381600  |
| C        | -2.18151300 | -0.07753300 | -0.29267200 |
| C        | -0.72525100 | 0.31863100  | 0.03895900  |
| H        | -2.88674100 | 0.69427200  | 0.04748500  |
| C        | -0.62895900 | 1.80906100  | 0.33321000  |
| F        | 0.67208100  | 2.19440700  | 0.72667600  |
| F        | -1.48121300 | 2.23945000  | 1.33048700  |
| F        | -0.90144300 | 2.59356000  | -0.79095600 |
| N        | 0.20599200  | -0.03669800 | -1.02623700 |
| H        | 0.04107300  | 0.43406200  | -1.90810700 |
| C        | 1.56751500  | -0.36684900 | -0.76611100 |
| C        | 1.90497200  | -1.63796100 | -0.27918100 |
| C        | 2.58510800  | 0.58291200  | -0.96774500 |
| C        | 3.22798000  | -1.93828200 | 0.04582900  |
| H        | 1.11845700  | -2.36658100 | -0.12747200 |
| C        | 3.91538700  | 0.27364800  | -0.65506200 |
| H        | 2.32898400  | 1.56201600  | -1.36002600 |
| C        | 4.23650200  | -0.98372900 | -0.13173700 |
| H        | 3.47026100  | -2.91720200 | 0.44338000  |
| H        | 4.69341400  | 1.01057900  | -0.82483500 |
| H        | 5.26419700  | -1.22270300 | 0.11857000  |
| N        | -1.49105400 | -1.50037300 | 1.49364800  |
| C        | -2.43697200 | -0.32059400 | -1.70780900 |
| N        | -2.64746200 | -0.51978500 | -2.83872500 |
| C        | -3.60273600 | -2.17511500 | 0.43174300  |
| H        | -3.60392600 | -2.65024100 | -0.55640400 |
| H        | -3.62115500 | -2.94833100 | 1.20058600  |

|    |             |             |            |
|----|-------------|-------------|------------|
| H  | -4.51760400 | -1.57423200 | 0.50363100 |
| N  | 0.58824800  | -0.37462400 | 2.09649400 |
| Li | 2.07180800  | 0.61978200  | 1.60012600 |

## D

|    |             |             |             |
|----|-------------|-------------|-------------|
| C  | 0.62436000  | -0.57406100 | -1.31205900 |
| C  | 2.60830500  | -1.10417200 | -0.49206200 |
| C  | 2.17644500  | 0.08289300  | 0.37993500  |
| C  | 0.67918800  | 0.26364700  | -0.02195200 |
| H  | 2.78557900  | 0.94789600  | 0.07816400  |
| C  | 0.42619200  | 1.75108900  | -0.36375000 |
| F  | -0.84829300 | 1.95157200  | -0.96044000 |
| F  | 1.33294500  | 2.25872100  | -1.29878100 |
| F  | 0.46572100  | 2.58293900  | 0.72785400  |
| N  | -0.13997200 | -0.32296500 | 0.98613200  |
| C  | -1.50769500 | -0.48202500 | 0.76452600  |
| C  | -2.03544200 | -1.72215700 | 0.31514500  |
| C  | -2.44636000 | 0.56176200  | 0.99626300  |
| C  | -3.39655300 | -1.88552800 | 0.04214400  |
| H  | -1.33832700 | -2.54075900 | 0.17343600  |
| C  | -3.80667200 | 0.39743500  | 0.71831800  |
| H  | -2.07935100 | 1.49913100  | 1.39835100  |
| C  | -4.29071600 | -0.82075700 | 0.21853300  |
| H  | -3.76231600 | -2.84515900 | -0.31009200 |
| H  | -4.49430200 | 1.21663300  | 0.90495300  |
| H  | -5.34654200 | -0.94725000 | 0.00612300  |
| N  | 1.76513200  | -1.41442000 | -1.42391800 |
| C  | 2.39251500  | -0.14306200 | 1.80477900  |
| N  | 2.68712400  | -0.32562300 | 2.91833000  |
| C  | 3.89852300  | -1.80351900 | -0.28202300 |
| H  | 3.89101500  | -2.31174300 | 0.68949600  |
| H  | 4.06501200  | -2.53660900 | -1.07166000 |
| H  | 4.72737700  | -1.08688900 | -0.26013700 |
| N  | -0.39250900 | -0.64135700 | -2.09838300 |
| Li | -2.02881600 | 0.20649600  | -1.42807500 |
| H  | -0.28600100 | -1.35255100 | -2.82402100 |

## E

|   |             |             |             |
|---|-------------|-------------|-------------|
| C | -0.71158400 | -0.24467500 | 1.32012600  |
| C | -2.84913300 | -0.49621600 | 0.76351200  |
| C | -2.12239100 | -0.61180300 | -0.58039600 |
| C | -0.66897400 | -0.63370600 | -0.13222500 |
| H | -2.27611700 | 0.31790900  | -1.14968400 |
| C | -0.52021500 | 2.29617800  | -0.31202300 |
| F | 0.95226400  | 2.48636700  | 0.38636600  |

|    |             |             |             |
|----|-------------|-------------|-------------|
| F  | -1.00254000 | 3.60955800  | -0.12760100 |
| F  | -0.06870900 | 2.32191900  | -1.68295100 |
| N  | 0.28965600  | -0.97784800 | -0.88882900 |
| C  | 1.65042100  | -0.97477100 | -0.49474700 |
| C  | 2.18235400  | -1.99025900 | 0.31145200  |
| C  | 2.47618300  | 0.05211100  | -0.97945800 |
| C  | 3.52795000  | -1.94714900 | 0.67475300  |
| H  | 1.53911000  | -2.79163100 | 0.65733500  |
| C  | 3.82068600  | 0.09279200  | -0.59175600 |
| H  | 2.05486300  | 0.80861900  | -1.63235800 |
| C  | 4.34932600  | -0.90070500 | 0.23917900  |
| H  | 3.93532400  | -2.72976400 | 1.30547200  |
| H  | 4.45348700  | 0.89450500  | -0.95704800 |
| H  | 5.39370000  | -0.87026200 | 0.52855900  |
| N  | -2.05806200 | -0.29730400 | 1.77301000  |
| C  | -2.54403100 | -1.75592700 | -1.37728200 |
| N  | -2.90326000 | -2.67907500 | -1.99299900 |
| C  | -4.32398900 | -0.57131600 | 0.88076800  |
| H  | -4.62322400 | -0.48365600 | 1.92535800  |
| H  | -4.78687700 | 0.23841700  | 0.30391300  |
| H  | -4.69638500 | -1.51566000 | 0.46769100  |
| N  | 0.28040900  | 0.09236200  | 2.05612600  |
| Li | 1.74026000  | 1.06895100  | 1.13060200  |
| H  | -0.00462400 | 0.30981700  | 3.01405800  |

|          |             |             |             |
|----------|-------------|-------------|-------------|
| <b>F</b> |             |             |             |
| C        | 0.69816000  | -0.69703000 | 0.60539800  |
| C        | 2.77643400  | 0.28682600  | 0.45589900  |
| C        | 1.98802500  | 1.01664500  | -0.63654900 |
| C        | 0.56877000  | 0.55591000  | -0.32175600 |
| H        | 2.28629900  | 0.61764000  | -1.61776800 |
| N        | -0.44170400 | 1.23392000  | -0.67961600 |
| C        | -1.78374200 | 0.95011700  | -0.37317000 |
| C        | -2.40593000 | 1.66142700  | 0.67053500  |
| C        | -2.52503100 | 0.01811300  | -1.11537700 |
| C        | -3.72822200 | 1.38009600  | 1.01294800  |
| H        | -1.82612700 | 2.38892600  | 1.22459900  |
| C        | -3.85632400 | -0.25051800 | -0.77000600 |
| H        | -2.05428900 | -0.50393300 | -1.93808500 |
| C        | -4.45906100 | 0.41259800  | 0.30355300  |
| H        | -4.19217800 | 1.91638100  | 1.83331200  |
| H        | -4.41693800 | -0.98003100 | -1.34402500 |
| H        | -5.48818100 | 0.20095900  | 0.56995500  |
| N        | 2.11000900  | -0.61674200 | 1.08111100  |
| C        | 2.16993100  | 2.46301900  | -0.64483600 |

|    |             |             |             |
|----|-------------|-------------|-------------|
| N  | 2.33713400  | 3.61756600  | -0.62904600 |
| C  | 4.20362900  | 0.59895800  | 0.73833400  |
| H  | 4.31462800  | 1.63862400  | 1.06679800  |
| H  | 4.57893500  | -0.06751000 | 1.51592800  |
| H  | 4.80982000  | 0.47590200  | -0.16669100 |
| N  | -0.26668400 | -0.73977800 | 1.64403500  |
| Li | -2.04999500 | -0.83730500 | 1.29757400  |
| H  | 0.20470700  | -0.94156200 | 2.52343200  |
| C  | 0.63761000  | -1.98463700 | -0.25902900 |
| F  | -0.67114600 | -2.23492200 | -0.69435300 |
| F  | 1.40627800  | -1.89303400 | -1.43093400 |
| F  | 1.04892700  | -3.11286600 | 0.40626300  |

**G**

|    |             |             |             |
|----|-------------|-------------|-------------|
| C  | 1.45766800  | 0.64028700  | -0.09370900 |
| C  | 1.90368100  | -1.24320500 | 1.02853800  |
| C  | 0.76243100  | -1.66764500 | 0.08936800  |
| C  | 0.43243300  | -0.37116800 | -0.69790900 |
| H  | -0.11696900 | -1.97561400 | 0.67050800  |
| N  | 2.25195700  | -0.00262300 | 0.92520000  |
| C  | 1.15703900  | -2.75618600 | -0.79642100 |
| N  | 1.51409400  | -3.60235500 | -1.51762200 |
| C  | 2.53807200  | -2.19449300 | 1.97823700  |
| H  | 3.01414000  | -3.02216000 | 1.43978000  |
| H  | 3.28979500  | -1.67770900 | 2.57629600  |
| H  | 1.78248100  | -2.62989200 | 2.64238900  |
| N  | 1.57357100  | 0.16754900  | -1.48614100 |
| C  | 1.25715800  | 2.10116200  | 0.06800900  |
| F  | 0.45976100  | 2.60422300  | -0.98610800 |
| F  | 0.61874900  | 2.42811000  | 1.24166800  |
| F  | 2.43389500  | 2.83086000  | 0.01947500  |
| N  | -0.79690200 | -0.11317900 | -1.27730100 |
| C  | -1.93523700 | -0.14568000 | -0.46874200 |
| C  | -3.19695900 | -0.25552200 | -1.09194600 |
| C  | -1.90547200 | -0.04304400 | 0.94029700  |
| C  | -4.36892800 | -0.26600600 | -0.34315200 |
| H  | -3.22833000 | -0.35235800 | -2.17286200 |
| C  | -3.08802500 | -0.06081700 | 1.68514800  |
| H  | -0.96145000 | 0.10345400  | 1.45867800  |
| C  | -4.32710500 | -0.17434000 | 1.05486000  |
| H  | -5.32502400 | -0.35611200 | -0.84996300 |
| H  | -3.03484600 | 0.03061900  | 2.76607200  |
| H  | -5.24320000 | -0.18650900 | 1.63521700  |
| Li | -0.02698500 | 1.06804300  | -2.52722000 |
| H  | 2.37313400  | -0.43239500 | -1.68419500 |

| <b>H</b> |             |             |             |
|----------|-------------|-------------|-------------|
| C        | 1.77265900  | -0.77881500 | -0.19637400 |
| C        | 2.28776200  | 1.40376200  | 0.33389500  |
| C        | 1.17616900  | 1.79564000  | -0.65513700 |
| C        | 0.00908200  | 0.84634600  | -0.42699100 |
| H        | 1.55681400  | 1.64313700  | -1.68790400 |
| N        | -1.24193000 | 1.31559900  | -0.31691500 |
| N        | 2.58725700  | 0.13495600  | 0.37566400  |
| C        | 0.68259100  | 3.15822000  | -0.53671600 |
| N        | 0.11975400  | 4.17838600  | -0.42994800 |
| C        | 3.11075200  | 2.45406300  | 1.00976400  |
| H        | 3.90754900  | 1.96169700  | 1.57126900  |
| H        | 3.57193100  | 3.14639200  | 0.28916500  |
| H        | 2.52093800  | 3.05718200  | 1.71253100  |
| N        | 0.39737000  | -0.42639200 | -0.36547100 |
| C        | 2.02884500  | -2.19222000 | -0.03477800 |
| F        | 3.35296300  | -2.55235500 | -0.17717400 |
| F        | 1.63774900  | -2.76344900 | 1.23071300  |
| F        | 1.26248000  | -2.95361400 | -0.94945400 |
| Li       | -1.77114600 | 3.12428000  | -0.29898800 |
| C        | -2.31328100 | 0.39863200  | -0.08142600 |
| C        | -3.01646200 | 0.45851300  | 1.13067100  |
| C        | -2.71557400 | -0.52389300 | -1.06167300 |
| C        | -4.10739100 | -0.38416700 | 1.35717600  |
| H        | -2.68099900 | 1.14614800  | 1.90233700  |
| C        | -3.79996300 | -1.37086200 | -0.82666400 |
| H        | -2.18259600 | -0.56245500 | -2.00734000 |
| C        | -4.50117800 | -1.30219200 | 0.38084500  |
| H        | -4.63850200 | -0.33320500 | 2.30180000  |
| H        | -4.09901500 | -2.08292100 | -1.58841800 |
| H        | -5.34226100 | -1.96248800 | 0.56059600  |
| H        | -0.30037800 | -1.15757500 | -0.29269900 |

| <b>I</b> |             |             |             |
|----------|-------------|-------------|-------------|
| C        | -2.38939600 | -1.83743600 | 0.07218800  |
| C        | -1.67359400 | 0.34753300  | -0.10228400 |
| C        | 0.02030900  | -1.37437000 | 0.07148300  |
| C        | -1.10858200 | -2.28332200 | 0.13317400  |
| H        | -0.87230600 | -3.33480400 | 0.22739200  |
| C        | -3.59378900 | -2.72120300 | 0.11910400  |
| H        | -4.24144300 | -2.42834100 | 0.95173600  |
| H        | -4.17732400 | -2.60628500 | -0.80039000 |
| H        | -3.31584000 | -3.77095400 | 0.23487200  |
| N        | -2.67710900 | -0.46276200 | -0.04173100 |

|   |             |             |             |
|---|-------------|-------------|-------------|
| N | -0.36051900 | -0.01930800 | -0.05648300 |
| C | -1.95109700 | 1.82919500  | -0.14193200 |
| F | -3.08763500 | 2.14505300  | -0.83380400 |
| F | -2.07713500 | 2.34699200  | 1.14212000  |
| F | -0.88572700 | 2.50885800  | -0.73447100 |
| N | 1.24412800  | -1.78424000 | 0.10351700  |
| C | 2.33192400  | -0.87571400 | 0.08148200  |
| C | 3.26211900  | -0.95483400 | -0.96515000 |
| C | 2.53675600  | 0.05577600  | 1.11486600  |
| C | 4.36325100  | -0.09892600 | -0.99110400 |
| H | 3.11031400  | -1.69580400 | -1.74224400 |
| C | 3.64431800  | 0.90599000  | 1.08415400  |
| H | 1.84412600  | 0.08823100  | 1.95128400  |
| C | 4.55843600  | 0.83674300  | 0.02988700  |
| H | 5.07517700  | -0.16637400 | -1.80718300 |
| H | 3.79524200  | 1.61798300  | 1.88909500  |
| H | 5.41749100  | 1.49835600  | 0.00824100  |
| H | 0.36961100  | 0.67746300  | -0.14974300 |

### Ts1

|   |             |             |             |
|---|-------------|-------------|-------------|
| N | 0.40681700  | -1.54571900 | 1.42863800  |
| C | -0.68381400 | -1.98093300 | 0.98133800  |
| C | -1.22595500 | -3.38642200 | 1.08321400  |
| H | -2.23281200 | -3.38981600 | 1.51945700  |
| H | -1.29618900 | -3.85785300 | 0.09581200  |
| H | -0.56329300 | -3.98156200 | 1.71329500  |
| C | -1.65630700 | -0.95683200 | 0.24382700  |
| H | -2.53732000 | -0.80000800 | 0.87994600  |
| C | -2.08909300 | -1.48726200 | -1.04270200 |
| N | -2.37013000 | -1.96432100 | -2.07178300 |
| C | -0.85996700 | 0.37260000  | 0.09847500  |
| N | 0.10367400  | 0.30829800  | -0.99665500 |
| C | -1.80307500 | 1.56349700  | -0.15374900 |
| F | -1.12355400 | 2.76346300  | -0.18595000 |
| F | -2.46057100 | 1.43017000  | -1.36596800 |
| F | -2.77776200 | 1.66427900  | 0.82938400  |
| C | -0.16211400 | 0.60585100  | 1.40006000  |
| N | 0.25084000  | 1.22887000  | 2.31770400  |
| C | 1.50274200  | 0.25407500  | -0.79508000 |
| C | 2.18304300  | 1.31786400  | -0.17969500 |
| C | 2.22361400  | -0.88724600 | -1.18319900 |
| C | 3.54807500  | 1.20413800  | 0.10720900  |
| H | 1.64345700  | 2.22251000  | 0.07106400  |
| C | 3.59253500  | -0.97876600 | -0.92985700 |
| H | 1.69612400  | -1.71709300 | -1.64176700 |

|    |             |             |             |
|----|-------------|-------------|-------------|
| C  | 4.25811900  | 0.05608100  | -0.26212100 |
| H  | 4.05828300  | 2.02892200  | 0.59310800  |
| H  | 4.13360600  | -1.86925200 | -1.23040200 |
| H  | 5.31870900  | -0.02295600 | -0.05103000 |
| H  | -0.23792600 | -0.19186000 | -1.80691200 |
| Li | 1.85637000  | -0.50399800 | 1.80286600  |

### Ts2

|    |             |             |             |
|----|-------------|-------------|-------------|
| C  | -0.67661400 | 0.14971100  | -1.31876100 |
| C  | -2.77496300 | 0.59174200  | -0.74402800 |
| C  | -2.08154200 | 0.41680200  | 0.61239400  |
| C  | -0.61543700 | 0.19390100  | 0.19601500  |
| H  | -2.48564700 | -0.46670800 | 1.12200100  |
| C  | -0.54453500 | -1.90265100 | 0.33007400  |
| F  | 0.76636400  | -2.34659300 | -0.25762300 |
| F  | -1.45446400 | -2.82064300 | -0.23749900 |
| F  | -0.41047500 | -2.29344800 | 1.66741600  |
| N  | 0.33251100  | 0.71893600  | 0.93395500  |
| C  | 1.67624200  | 0.76238300  | 0.53009100  |
| C  | 2.16766200  | 1.76022300  | -0.33539900 |
| C  | 2.57805500  | -0.20468000 | 1.02557600  |
| C  | 3.50413200  | 1.75682700  | -0.73522600 |
| H  | 1.48380500  | 2.52061900  | -0.69549200 |
| C  | 3.91573400  | -0.20600200 | 0.61279900  |
| H  | 2.21094400  | -0.94314800 | 1.72930900  |
| C  | 4.38348800  | 0.76664400  | -0.27835300 |
| H  | 3.86205000  | 2.52835600  | -1.40905100 |
| H  | 4.59344100  | -0.95909700 | 1.00183600  |
| H  | 5.42126200  | 0.76810800  | -0.59263400 |
| N  | -1.99108600 | 0.45034800  | -1.76891100 |
| C  | -2.27955100 | 1.57747000  | 1.47620300  |
| N  | -2.49820000 | 2.50856300  | 2.14366000  |
| C  | -4.22380800 | 0.88337600  | -0.85959700 |
| H  | -4.47024600 | 1.80768600  | -0.32457500 |
| H  | -4.50716500 | 0.98147000  | -1.90779100 |
| H  | -4.80796100 | 0.07786300  | -0.39893300 |
| N  | 0.29336200  | -0.15293900 | -2.10103900 |
| Li | 1.80761800  | -0.99703800 | -1.17028900 |
| H  | 0.03454400  | -0.12669500 | -3.08882500 |

### Ts3

|   |            |             |             |
|---|------------|-------------|-------------|
| C | 0.66968100 | -0.31023700 | 1.00636100  |
| C | 2.81673000 | 0.21317400  | 0.58353500  |
| C | 2.05706200 | 0.86288100  | -0.58101800 |
| C | 0.60978600 | 0.66845200  | -0.14400000 |

|    |             |             |             |
|----|-------------|-------------|-------------|
| H  | 2.22530200  | 0.27084900  | -1.49400200 |
| C  | 0.53682200  | -1.99161700 | -0.35488200 |
| F  | -0.90995600 | -2.35477200 | -0.12610700 |
| F  | 1.19299100  | -3.17857200 | -0.01806000 |
| F  | 0.59079800  | -1.93440100 | -1.77491300 |
| N  | -0.36261600 | 1.25483900  | -0.71326200 |
| C  | -1.71822100 | 1.04070600  | -0.37473800 |
| C  | -2.33244400 | 1.75833200  | 0.66280900  |
| C  | -2.46346500 | 0.11802000  | -1.12684500 |
| C  | -3.66584300 | 1.50599000  | 0.98272900  |
| H  | -1.74824400 | 2.47081400  | 1.23218300  |
| C  | -3.80030200 | -0.13235200 | -0.79275600 |
| H  | -1.98533300 | -0.40954400 | -1.94363900 |
| C  | -4.40372700 | 0.55188000  | 0.26815800  |
| H  | -4.12991000 | 2.04895700  | 1.79864900  |
| H  | -4.36658200 | -0.85471400 | -1.37054300 |
| H  | -5.44010100 | 0.36058800  | 0.52229100  |
| N  | 2.05819600  | -0.42715200 | 1.40602600  |
| C  | 2.43520700  | 2.24576500  | -0.84046600 |
| N  | 2.76167500  | 3.35026100  | -1.02585300 |
| C  | 4.29440300  | 0.29174600  | 0.70812200  |
| H  | 4.62049800  | -0.24851800 | 1.59752900  |
| H  | 4.77456000  | -0.14734300 | -0.17460600 |
| H  | 4.62364300  | 1.33495200  | 0.77344300  |
| N  | -0.30805300 | -0.50489400 | 1.86368700  |
| Li | -1.91032900 | -1.10311900 | 0.97348000  |
| H  | 0.03410200  | -0.95479600 | 2.71374800  |

#### Ts4

|   |             |             |             |
|---|-------------|-------------|-------------|
| C | 0.96230900  | -0.79955300 | 0.38109700  |
| C | 2.70580300  | -0.11652800 | -0.87038900 |
| C | 1.91239100  | 1.17301600  | -0.62303500 |
| C | 0.65476100  | 0.65819200  | 0.09684500  |
| H | 1.59485900  | 1.61542500  | -1.57734100 |
| N | -0.42043000 | 1.41645500  | 0.30926800  |
| C | -1.72893000 | 1.06147200  | -0.07272400 |
| C | -2.80664900 | 1.54675100  | 0.68741000  |
| C | -2.00641500 | 0.30008800  | -1.22151200 |
| C | -4.12052400 | 1.24299000  | 0.33554000  |
| H | -2.60266600 | 2.18858600  | 1.54157700  |
| C | -3.32211200 | -0.00743500 | -1.56448800 |
| H | -1.18991800 | -0.04980900 | -1.84546400 |
| C | -4.38801500 | 0.45509200  | -0.78806500 |
| H | -4.93847800 | 1.62513700  | 0.93810600  |
| H | -3.51488700 | -0.60792100 | -2.44782800 |



|    |             |             |             |
|----|-------------|-------------|-------------|
| H  | -5.41023100 | 0.21616400  | -1.05963400 |
| N  | 2.16458800  | -1.17386800 | -0.37051500 |
| C  | 2.64899300  | 2.17568700  | 0.13596100  |
| N  | 3.23169000  | 2.95226200  | 0.78418700  |
| C  | 3.98081900  | -0.12614100 | -1.63536400 |
| H  | 4.73901200  | 0.48029100  | -1.12602800 |
| H  | 4.34828900  | -1.14857700 | -1.73218400 |
| H  | 3.83580900  | 0.30261500  | -2.63357100 |
| N  | 1.23763900  | -0.14968200 | 1.66089800  |
| Li | -0.05341600 | 1.15341500  | 2.22445600  |
| H  | 2.23351900  | -0.20692500 | 1.88685100  |
| C  | -0.01673800 | -1.93928000 | 0.44473100  |
| F  | -1.16075500 | -1.59687500 | 1.14922100  |
| F  | -0.40775900 | -2.36665700 | -0.81294400 |
| F  | 0.53700000  | -3.02952300 | 1.09252800  |

### Ts5

|   |             |             |             |
|---|-------------|-------------|-------------|
| C | -1.34679100 | 0.78176900  | 0.65737200  |
| C | -2.89138400 | -0.66769200 | -0.06776300 |
| C | -1.62277100 | -1.32723200 | -0.63729700 |
| C | -0.40575700 | -0.51535400 | -0.17518900 |
| H | -1.67188900 | -1.30672400 | -1.73505200 |
| N | 0.64768000  | -0.31927400 | -0.99764800 |
| C | 1.95975600  | -0.39859000 | -0.47524400 |
| C | 2.97387100  | 0.37976500  | -1.05995700 |
| C | 2.31201200  | -1.27238400 | 0.57219800  |
| C | 4.28826800  | 0.31136800  | -0.60228200 |
| H | 2.73568000  | 1.04501200  | -1.88909100 |
| C | 3.62833100  | -1.33426600 | 1.03013600  |
| H | 1.56294800  | -1.93430400 | 0.99827700  |
| C | 4.62374500  | -0.54108400 | 0.45315300  |
| H | 5.05143800  | 0.92556200  | -1.06913700 |
| H | 3.87906300  | -2.01948600 | 1.83352000  |
| H | 5.64545400  | -0.59503100 | 0.81185900  |
| N | -2.72427200 | 0.46601000  | 0.52385100  |
| C | -1.47450600 | -2.71831800 | -0.21559700 |
| N | -1.36449000 | -3.83027000 | 0.12181900  |
| C | -4.22708000 | -1.29388900 | -0.26707300 |
| H | -4.38906000 | -1.54740300 | -1.32142300 |
| H | -4.30649000 | -2.22364700 | 0.30834400  |
| H | -5.00638600 | -0.60664800 | 0.06576000  |
| N | -0.49167000 | -0.25957200 | 1.22670300  |
| C | -0.91074100 | 2.10365700  | 0.40369100  |
| F | -0.67471600 | 2.37580800  | -1.18935000 |
| F | -1.76192000 | 3.13527800  | 0.65157700  |

|    |            |            |             |
|----|------------|------------|-------------|
| F  | 0.35913500 | 2.40287600 | 0.84747300  |
| H  | 0.35011100 | 0.04468700 | 1.71059500  |
| Li | 0.31139500 | 1.18252700 | -2.10696400 |

**Ts6**

|    |             |             |             |
|----|-------------|-------------|-------------|
| C  | 2.26267500  | 0.08744500  | 0.11946600  |
| C  | 1.09307000  | -1.89260100 | 0.23076400  |
| C  | -0.12710200 | -1.24476400 | -0.24557200 |
| C  | -0.12895500 | 0.23194100  | -0.05373800 |
| H  | -1.04594600 | -1.72771000 | 0.08362200  |
| N  | -1.18320100 | 1.04621000  | -0.29960300 |
| C  | -2.47235700 | 0.71850100  | 0.15019700  |
| C  | -3.56880500 | 1.32902400  | -0.49552700 |
| C  | -2.74224600 | -0.15282300 | 1.22629000  |
| C  | -4.87947000 | 1.03438700  | -0.12564100 |
| H  | -3.38614100 | 2.09787700  | -1.24779600 |
| C  | -4.05674500 | -0.44170500 | 1.59124600  |
| H  | -1.92062400 | -0.56512700 | 1.80429300  |
| C  | -5.13449900 | 0.13326100  | 0.91171800  |
| H  | -5.70339500 | 1.52065900  | -0.63792400 |
| H  | -4.24008800 | -1.11393400 | 2.42361900  |
| H  | -6.15348900 | -0.09667700 | 1.20109700  |
| N  | 2.24416100  | -1.22526300 | 0.29366500  |
| C  | -0.41112800 | -1.34821400 | -1.95224000 |
| N  | -0.82640300 | -0.69365400 | -2.84288900 |
| C  | 1.09310900  | -3.37688600 | 0.37525600  |
| H  | 2.06812600  | -3.72326600 | 0.72172200  |
| H  | 0.32162500  | -3.71797400 | 1.07620000  |
| H  | 0.87743300  | -3.84778000 | -0.59894000 |
| N  | 1.08559300  | 0.80398200  | 0.03200800  |
| C  | 3.51382800  | 0.84415300  | 0.28679000  |
| F  | 3.86824800  | 1.07948800  | 1.62754900  |
| F  | 4.60774100  | 0.24040000  | -0.29175400 |
| F  | 3.38307400  | 2.12710100  | -0.27700600 |
| H  | 1.10058200  | 1.81811100  | 0.06263600  |
| Li | -1.51298900 | 1.09455500  | -2.27131900 |

## Reference

- [1] Frisch, M. J., Trucks, G. W., Schlegel, H. B., Scuseria, G. E., Robb, M. A., Cheeseman, J. R., Scalmani, G., Barone, V., Mennucci, B., Petersson, G. A., Nakatsuji, H., Caricato, M., Li, X., Hratchian, H. P., Izmaylov, A. F., Bloino, J., Zheng, G., Sonnenberg, J. L., Hada, M., Ehara, M., Toyota, K., Fukuda, R., Hasegawa, J., Ishida, M., Nakajima, T., Honda, Y., Kitao, O., Nakai, H., Vreven, T., Jr. Montgomery, J. A., Peralta, J. E., Ogliaro, F., Bearpark, M., Heyd, J. J., Brothers, E., Kudin, K. N., Staroverov, V. N., Keith, T., Kobayashi, R., Normand, J., Raghavachari, K., Rendell, A., Burant, J. C., Iyengar, S. S., Tomasi, J., Cossi, M., Rega, N., Millam, J. M., Klene, M., Knox, J. E., Cross, J. B., Bakken, V., Adamo, C., Jaramillo, J., Gomperts, R., Stratmann, R. E., Yazyev, O., Austin, A. J., Cammi, R., Pomelli, C., Ochterski, J. W., Martin, R. L., Morokuma, K., Zakrzewski, V. G., Voth, G. A., Salvador, P., Dannenberg, J. J., Dapprich, S., Daniels, A. D., Farkas, O., Foresman, J. B., Ortiz, J. V., Cioslowski, J. & Fox, D. J. Gaussian 09, Rev. D.01; Gaussian, Inc.: Wallingford, CT, 2010.
- [2] Chai, J. & Head-Gordon, M. *Phys. Chem. Chem. Phys.* **10**, 6615–6620 (2008).
- [3] Ditchfield, R., Hehre, W. J. & Pople, J. A. *J. Chem. Phys.* **54**, 724 (1971).
- [4] Hehre, W. J., Ditchfield, R. & Pople, J. A. *J. Chem. Phys.* **54**, 2257 (1971).
- [5] Hariharan, P. C. & Pople, J. A. *Theor. Chim. Acta.* **28**, 213–222 (1973).
- [6] Marenich, A. V., Cramer, C. J. & Truhlar, D. G. *J. Phys. Chem. B* **113**, 6378–6396 (2009).
- [7] Peverati, R. & Truhlar, D. G. *Phys. Chem. Chem. Phys.* **14**, 11363–11370 (2012).
- [8] Lin, Y.-S., Tsai, C.-W., Li, G.-D. & Chai, J.-D. *J. Chem. Phys.* **136**, 154109 (2012).
- [9] Steckel, J. A. *J. Phys. Chem. A* **116**, 11643–11650 (2012).
- [10] Zhao, Y., Ng, H. T., Peverati, R. & Truhlar, D. G. *J. Chem. Theory Comput.* **8**, 2824–2834 (2012).
- [11] Legault, C. Y. CYLView, 1.0b; Université de Sherbrooke, Canada, 2009; <http://www.cylview.org>.

## 6. Crystal data and structure refinement of product **3m**

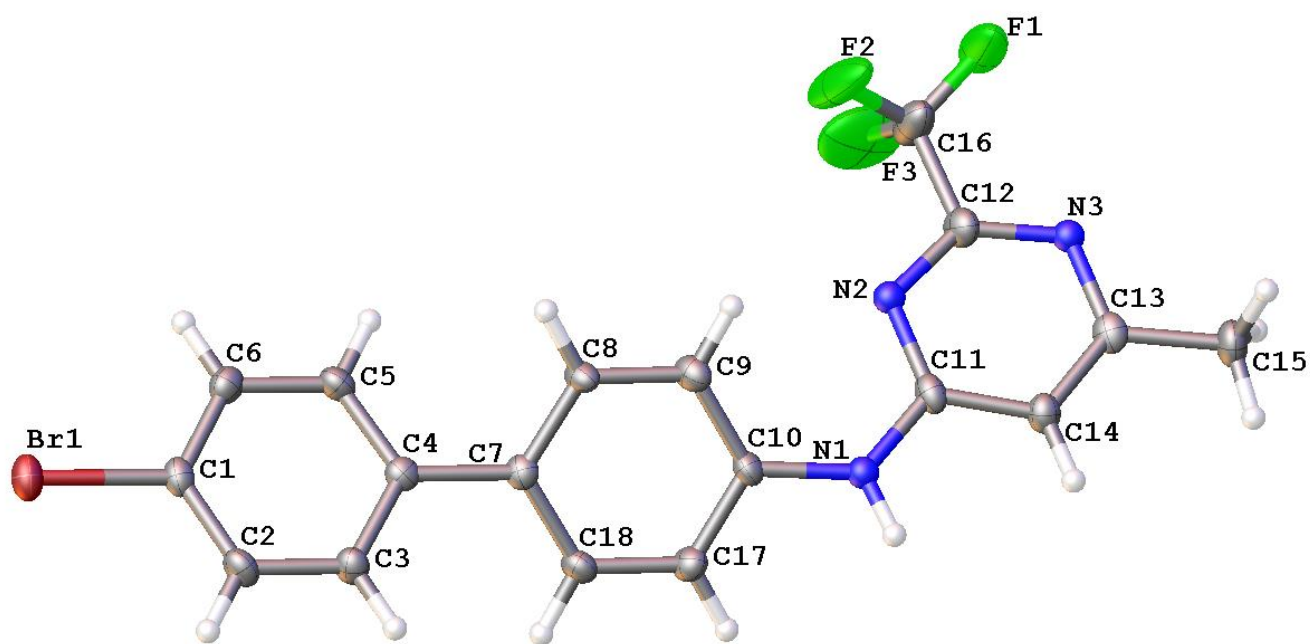

**Figure S3.** Crystal data and structure refinement of product **3m**.

**Table S3.** Crystal data and structure refinement for **3m**.

|                      |                                                                 |                  |
|----------------------|-----------------------------------------------------------------|------------------|
| Identification code  | <b>3m</b>                                                       |                  |
| CCDC                 | 1956510                                                         |                  |
| Empirical formula    | C <sub>18</sub> H <sub>13</sub> BrF <sub>3</sub> N <sub>3</sub> |                  |
| Formula weight       | 408.21                                                          |                  |
| Temperature          | 170.15 K                                                        |                  |
| Wavelength           | 1.34139 Å                                                       |                  |
| Crystal system       | Monoclinic                                                      |                  |
| Space group          | P 1 21/n 1                                                      |                  |
| Unit cell dimensions | a = 23.6780(5) Å                                                | = 90 °           |
|                      | b = 11.5222(2) Å                                                | = 113.6610(10) ° |
|                      | c = 26.8116(6) Å                                                | = 90 °           |
| Volume               | 6699.9(2) Å <sup>3</sup>                                        |                  |
| Z                    | 16                                                              |                  |
| Density (calculated) | 1.619 Mg/m <sup>3</sup>                                         |                  |

|                                   |                                             |
|-----------------------------------|---------------------------------------------|
| Absorption coefficient            | 2.513 mm <sup>-1</sup>                      |
| F(000)                            | 3264                                        |
| Crystal size                      | 0.08 x 0.05 x 0.03 mm <sup>3</sup>          |
| Theta range for data collection   | 3.131 to 55.025 °                           |
| Index ranges                      | -28<=h<=28, -14<=k<=10, -32<=l<=32          |
| Reflections collected             | 69365                                       |
| Independent reflections           | 12722 [R(int) = 0.0797]                     |
| Completeness to theta = 53.594 °  | 99.7 %                                      |
| Absorption correction             | Semi-empirical from equivalents             |
| Max. and min. transmission        | 0.7508 and 0.5507                           |
| Refinement method                 | Full-matrix least-squares on F <sup>2</sup> |
| Data / restraints / parameters    | 12722 / 6 / 905                             |
| Goodness-of-fit on F <sup>2</sup> | 1.010                                       |
| Final R indices [I>2sigma(I)]     | R1 = 0.0566, wR2 = 0.1043                   |
| R indices (all data)              | R1 = 0.1058, wR2 = 0.1248                   |
| Extinction coefficient            | n/a                                         |
| Largest diff. peak and hole       | 0.966 and -0.750 e.Å <sup>-3</sup>          |

**Table S4.** Atomic coordinates ( x 10<sup>4</sup>) and equivalent isotropic displacement parameters (Å<sup>2</sup>x 10<sup>3</sup>) for **3m**. U(eq) is defined as one third of the trace of the orthogonalized U<sup>ij</sup> tensor.

|       | x       | y        | z       | U(eq)  |
|-------|---------|----------|---------|--------|
| Br(1) | 7582(1) | 4293(1)  | 2470(1) | 42(1)  |
| F(1)  | 5106(2) | 12519(5) | 4512(1) | 128(2) |
| F(2)  | 5705(2) | 11574(5) | 4269(2) | 141(2) |
| F(3)  | 4945(3) | 10801(5) | 4302(2) | 161(3) |
| N(1)  | 4559(2) | 10969(3) | 2316(2) | 36(1)  |

|       |          |          |         |        |
|-------|----------|----------|---------|--------|
| N(2)  | 4859(2)  | 11407(3) | 3233(2) | 36(1)  |
| N(3)  | 4361(2)  | 12938(3) | 3510(2) | 36(1)  |
| C(1)  | 7020(2)  | 5485(4)  | 2448(2) | 31(1)  |
| C(2)  | 6593(2)  | 5869(4)  | 1954(2) | 36(1)  |
| C(3)  | 6194(2)  | 6755(4)  | 1940(2) | 34(1)  |
| C(4)  | 6210(2)  | 7263(4)  | 2419(2) | 29(1)  |
| C(5)  | 6644(2)  | 6850(4)  | 2911(2) | 34(1)  |
| C(6)  | 7048(2)  | 5973(4)  | 2926(2) | 35(1)  |
| C(7)  | 5785(2)  | 8226(4)  | 2400(2) | 29(1)  |
| C(8)  | 5958(2)  | 9100(4)  | 2788(2) | 31(1)  |
| C(9)  | 5563(2)  | 9990(4)  | 2779(2) | 36(1)  |
| C(10) | 4973(2)  | 10042(4) | 2368(2) | 29(1)  |
| C(11) | 4503(2)  | 11631(4) | 2711(2) | 34(1)  |
| C(12) | 4753(2)  | 12071(5) | 3587(2) | 40(1)  |
| C(13) | 4015(2)  | 13183(4) | 2976(2) | 34(1)  |
| C(14) | 4074(2)  | 12550(4) | 2566(2) | 35(1)  |
| C(15) | 3582(2)  | 14193(4) | 2873(2) | 46(1)  |
| C(16) | 5127(3)  | 11770(7) | 4169(2) | 66(2)  |
| C(17) | 4795(2)  | 9184(4)  | 1978(2) | 35(1)  |
| C(18) | 5188(2)  | 8293(4)  | 1991(2) | 33(1)  |
| Br(2) | 2572(1)  | 6861(1)  | 2603(1) | 50(1)  |
| F(4)  | -1858(2) | -1438(4) | 495(1)  | 93(1)  |
| F(5)  | -1041(2) | -513(5)  | 676(1)  | 118(2) |
| F(6)  | -1777(3) | 271(4)   | 779(2)  | 132(2) |
| N(4)  | -84(2)   | -242(3)  | 2652(2) | 36(1)  |
| N(5)  | -754(2)  | -538(3)  | 1758(2) | 34(1)  |
| N(6)  | -1571(2) | -1928(3) | 1532(2) | 36(1)  |
| C(19) | 2082(2)  | 5544(4)  | 2581(2) | 34(1)  |
| C(20) | 2124(2)  | 5052(4)  | 3064(2) | 34(1)  |
| C(21) | 1776(2)  | 4071(4)  | 3043(2) | 31(1)  |

|       |          |          |         |       |
|-------|----------|----------|---------|-------|
| C(22) | 1384(2)  | 3584(4)  | 2545(2) | 27(1) |
| C(23) | 1351(2)  | 4117(4)  | 2070(2) | 35(1) |
| C(24) | 1698(2)  | 5094(4)  | 2084(2) | 36(1) |
| C(25) | 1014(2)  | 2544(4)  | 2539(2) | 26(1) |
| C(26) | 1226(2)  | 1726(4)  | 2953(2) | 32(1) |
| C(27) | 868(2)   | 799(4)   | 2975(2) | 31(1) |
| C(28) | 274(2)   | 662(4)   | 2573(2) | 26(1) |
| C(29) | -580(2)  | -801(4)  | 2282(2) | 32(1) |
| C(30) | -1243(2) | -1113(4) | 1424(2) | 37(1) |
| C(31) | -1385(2) | -2196(4) | 2065(2) | 33(1) |
| C(32) | -892(2)  | -1645(4) | 2452(2) | 34(1) |
| C(33) | -1747(2) | -3107(4) | 2209(2) | 41(1) |
| C(34) | -1474(3) | -734(6)  | 839(2)  | 57(2) |
| C(35) | 61(2)    | 1444(4)  | 2146(2) | 33(1) |
| C(36) | 425(2)   | 2372(4)  | 2131(2) | 33(1) |
| Br(3) | 3515(1)  | 11511(1) | 813(1)  | 55(1) |
| F(7)  | 5993(1)  | 3278(2)  | 490(1)  | 54(1) |
| F(8)  | 6625(1)  | 1898(3)  | 674(2)  | 76(1) |
| F(9)  | 6559(2)  | 2907(4)  | 1309(1) | 92(1) |
| N(7)  | 7251(2)  | 6803(3)  | 816(2)  | 36(1) |
| N(8)  | 6904(2)  | 4902(3)  | 804(1)  | 28(1) |
| N(9)  | 7546(2)  | 3303(3)  | 794(2)  | 32(1) |
| C(37) | 4205(2)  | 10784(4) | 746(2)  | 37(1) |
| C(38) | 4104(2)  | 9919(4)  | 371(2)  | 38(1) |
| C(39) | 4600(2)  | 9305(4)  | 359(2)  | 33(1) |
| C(40) | 5200(2)  | 9545(4)  | 720(2)  | 29(1) |
| C(41) | 5288(2)  | 10472(4) | 1076(2) | 41(1) |
| C(42) | 4792(2)  | 11098(4) | 1086(2) | 44(1) |
| C(43) | 5726(2)  | 8827(4)  | 729(2)  | 29(1) |
| C(44) | 5637(2)  | 7726(4)  | 495(2)  | 29(1) |

|       |         |          |         |        |
|-------|---------|----------|---------|--------|
| C(45) | 6122(2) | 7029(4)  | 518(2)  | 31(1)  |
| C(46) | 6727(2) | 7422(4)  | 785(2)  | 30(1)  |
| C(47) | 7340(2) | 5639(4)  | 804(2)  | 28(1)  |
| C(48) | 7047(2) | 3793(4)  | 800(2)  | 29(1)  |
| C(49) | 7983(2) | 4061(4)  | 788(2)  | 33(1)  |
| C(50) | 7898(2) | 5232(4)  | 796(2)  | 35(1)  |
| C(51) | 8550(2) | 3548(5)  | 762(2)  | 43(1)  |
| C(52) | 6564(2) | 2961(4)  | 822(2)  | 37(1)  |
| C(53) | 6819(2) | 8525(4)  | 1013(2) | 38(1)  |
| C(54) | 6334(2) | 9207(4)  | 992(2)  | 38(1)  |
| Br(4) | 4940(1) | 4444(1)  | 807(1)  | 52(1)  |
| F(10) | 1888(2) | 13890(4) | 1069(2) | 124(2) |
| F(11) | 2409(2) | 12583(4) | 1008(3) | 140(2) |
| F(12) | 1810(2) | 13325(5) | 325(2)  | 151(2) |
| N(10) | 1180(2) | 9126(3)  | 748(2)  | 35(1)  |
| N(11) | 1510(2) | 11044(3) | 753(2)  | 31(1)  |
| N(12) | 845(2)  | 12625(3) | 740(2)  | 35(1)  |
| C(55) | 4212(2) | 5280(4)  | 714(2)  | 34(1)  |
| C(56) | 4243(2) | 6468(4)  | 768(2)  | 34(1)  |
| C(57) | 3728(2) | 7079(4)  | 731(2)  | 32(1)  |
| C(58) | 3170(2) | 6521(4)  | 634(2)  | 29(1)  |
| C(59) | 3149(2) | 5324(4)  | 563(2)  | 32(1)  |
| C(60) | 3668(2) | 4702(4)  | 603(2)  | 36(1)  |
| C(61) | 2635(2) | 7189(4)  | 633(2)  | 28(1)  |
| C(62) | 2230(2) | 6722(4)  | 836(2)  | 33(1)  |
| C(63) | 1759(2) | 7368(4)  | 871(2)  | 36(1)  |
| C(64) | 1675(2) | 8522(4)  | 704(2)  | 30(1)  |
| C(65) | 1074(2) | 10289(4) | 742(2)  | 31(1)  |
| C(66) | 1362(2) | 12150(4) | 760(2)  | 33(1)  |
| C(67) | 403(2)  | 11849(4) | 712(2)  | 35(1)  |



|       |         |          |        |       |
|-------|---------|----------|--------|-------|
| C(68) | 503(2)  | 10681(4) | 721(2) | 36(1) |
| C(69) | -206(2) | 12352(5) | 652(2) | 47(1) |
| C(70) | 1853(2) | 12997(5) | 782(2) | 44(1) |
| C(71) | 2068(2) | 9000(4)  | 487(2) | 31(1) |
| C(72) | 2536(2) | 8332(4)  | 451(2) | 32(1) |

---

**Table S5.** Bond lengths [ $\text{\AA}$ ] and angles [ $^\circ$ ] for **3m**.

---

|            |          |
|------------|----------|
| Br(1)-C(1) | 1.896(4) |
| F(1)-C(16) | 1.278(7) |
| F(2)-C(16) | 1.302(7) |
| F(3)-C(16) | 1.298(8) |
| N(1)-H(1)  | 0.8800   |
| N(1)-C(10) | 1.418(5) |
| N(1)-C(11) | 1.356(5) |
| N(2)-C(11) | 1.337(6) |
| N(2)-C(12) | 1.320(6) |
| N(3)-C(12) | 1.322(6) |
| N(3)-C(13) | 1.363(6) |
| C(1)-C(2)  | 1.377(6) |
| C(1)-C(6)  | 1.376(6) |
| C(2)-H(2)  | 0.9500   |
| C(2)-C(3)  | 1.382(6) |
| C(3)-H(3)  | 0.9500   |
| C(3)-C(4)  | 1.397(6) |
| C(4)-C(5)  | 1.390(6) |
| C(4)-C(7)  | 1.486(6) |
| C(5)-H(5)  | 0.9500   |
| C(5)-C(6)  | 1.380(6) |

|              |          |
|--------------|----------|
| C(6)-H(6)    | 0.9500   |
| C(7)-C(8)    | 1.387(6) |
| C(7)-C(18)   | 1.402(6) |
| C(8)-H(8)    | 0.9500   |
| C(8)-C(9)    | 1.380(6) |
| C(9)-H(9)    | 0.9500   |
| C(9)-C(10)   | 1.391(6) |
| C(10)-C(17)  | 1.377(6) |
| C(11)-C(14)  | 1.409(6) |
| C(12)-C(16)  | 1.494(7) |
| C(13)-C(14)  | 1.373(6) |
| C(13)-C(15)  | 1.501(6) |
| C(14)-H(14)  | 0.9500   |
| C(15)-H(15A) | 0.9800   |
| C(15)-H(15B) | 0.9800   |
| C(15)-H(15C) | 0.9800   |
| C(17)-H(17)  | 0.9500   |
| C(17)-C(18)  | 1.376(6) |
| C(18)-H(18)  | 0.9500   |
| Br(2)-C(19)  | 1.898(4) |
| F(4)-C(34)   | 1.288(6) |
| F(5)-C(34)   | 1.291(6) |
| F(6)-C(34)   | 1.337(7) |
| N(4)-H(4)    | 0.8800   |
| N(4)-C(28)   | 1.412(5) |
| N(4)-C(29)   | 1.357(5) |
| N(5)-C(29)   | 1.332(6) |
| N(5)-C(30)   | 1.324(5) |
| N(6)-C(30)   | 1.322(6) |
| N(6)-C(31)   | 1.353(6) |

|              |          |
|--------------|----------|
| C(19)-C(20)  | 1.381(6) |
| C(19)-C(24)  | 1.378(6) |
| C(20)-H(20)  | 0.9500   |
| C(20)-C(21)  | 1.386(6) |
| C(21)-H(21)  | 0.9500   |
| C(21)-C(22)  | 1.401(6) |
| C(22)-C(23)  | 1.388(6) |
| C(22)-C(25)  | 1.482(6) |
| C(23)-H(23)  | 0.9500   |
| C(23)-C(24)  | 1.386(6) |
| C(24)-H(24)  | 0.9500   |
| C(25)-C(26)  | 1.386(6) |
| C(25)-C(36)  | 1.399(6) |
| C(26)-H(26)  | 0.9500   |
| C(26)-C(27)  | 1.380(6) |
| C(27)-H(27)  | 0.9500   |
| C(27)-C(28)  | 1.397(6) |
| C(28)-C(35)  | 1.382(6) |
| C(29)-C(32)  | 1.402(6) |
| C(30)-C(34)  | 1.503(7) |
| C(31)-C(32)  | 1.369(6) |
| C(31)-C(33)  | 1.500(6) |
| C(32)-H(32)  | 0.9500   |
| C(33)-H(33A) | 0.9800   |
| C(33)-H(33B) | 0.9800   |
| C(33)-H(33C) | 0.9800   |
| C(35)-H(35)  | 0.9500   |
| C(35)-C(36)  | 1.385(6) |
| C(36)-H(36)  | 0.9500   |
| Br(3)-C(37)  | 1.907(4) |

|             |          |
|-------------|----------|
| F(7)-C(52)  | 1.338(5) |
| F(8)-C(52)  | 1.314(5) |
| F(9)-C(52)  | 1.312(5) |
| N(7)-H(7)   | 0.8800   |
| N(7)-C(46)  | 1.404(5) |
| N(7)-C(47)  | 1.359(5) |
| N(8)-C(47)  | 1.337(5) |
| N(8)-C(48)  | 1.323(5) |
| N(9)-C(48)  | 1.315(5) |
| N(9)-C(49)  | 1.359(6) |
| C(37)-C(38) | 1.365(7) |
| C(37)-C(42) | 1.371(7) |
| C(38)-H(38) | 0.9500   |
| C(38)-C(39) | 1.382(6) |
| C(39)-H(39) | 0.9500   |
| C(39)-C(40) | 1.388(6) |
| C(40)-C(41) | 1.391(6) |
| C(40)-C(43) | 1.488(6) |
| C(41)-H(41) | 0.9500   |
| C(41)-C(42) | 1.388(7) |
| C(42)-H(42) | 0.9500   |
| C(43)-C(44) | 1.393(6) |
| C(43)-C(54) | 1.394(6) |
| C(44)-H(44) | 0.9500   |
| C(44)-C(45) | 1.382(6) |
| C(45)-H(45) | 0.9500   |
| C(45)-C(46) | 1.394(6) |
| C(46)-C(53) | 1.389(6) |
| C(47)-C(50) | 1.410(6) |
| C(48)-C(52) | 1.512(6) |

|              |          |
|--------------|----------|
| C(49)-C(50)  | 1.366(6) |
| C(49)-C(51)  | 1.492(6) |
| C(50)-H(50)  | 0.9500   |
| C(51)-H(51A) | 0.9800   |
| C(51)-H(51B) | 0.9800   |
| C(51)-H(51C) | 0.9800   |
| C(53)-H(53)  | 0.9500   |
| C(53)-C(54)  | 1.375(6) |
| C(54)-H(54)  | 0.9500   |
| Br(4)-C(55)  | 1.902(4) |
| F(10)-C(70)  | 1.269(6) |
| F(11)-C(70)  | 1.299(6) |
| F(12)-C(70)  | 1.246(6) |
| N(10)-H(10)  | 0.8800   |
| N(10)-C(64)  | 1.409(5) |
| N(10)-C(65)  | 1.362(6) |
| N(11)-C(65)  | 1.342(5) |
| N(11)-C(66)  | 1.324(6) |
| N(12)-C(66)  | 1.323(5) |
| N(12)-C(67)  | 1.356(6) |
| C(55)-C(56)  | 1.376(7) |
| C(55)-C(60)  | 1.372(6) |
| C(56)-H(56)  | 0.9500   |
| C(56)-C(57)  | 1.378(6) |
| C(57)-H(57)  | 0.9500   |
| C(57)-C(58)  | 1.396(6) |
| C(58)-C(59)  | 1.390(6) |
| C(58)-C(61)  | 1.482(6) |
| C(59)-H(59)  | 0.9500   |
| C(59)-C(60)  | 1.389(6) |

|                  |          |
|------------------|----------|
| C(60)-H(60)      | 0.9500   |
| C(61)-C(62)      | 1.387(6) |
| C(61)-C(72)      | 1.391(6) |
| C(62)-H(62)      | 0.9500   |
| C(62)-C(63)      | 1.374(6) |
| C(63)-H(63)      | 0.9500   |
| C(63)-C(64)      | 1.392(6) |
| C(64)-C(71)      | 1.393(6) |
| C(65)-C(68)      | 1.406(6) |
| C(66)-C(70)      | 1.500(6) |
| C(67)-C(68)      | 1.364(6) |
| C(67)-C(69)      | 1.502(6) |
| C(68)-H(68)      | 0.9500   |
| C(69)-H(69A)     | 0.9800   |
| C(69)-H(69B)     | 0.9800   |
| C(69)-H(69C)     | 0.9800   |
| C(71)-H(71)      | 0.9500   |
| C(71)-C(72)      | 1.384(6) |
| C(72)-H(72)      | 0.9500   |
|                  |          |
| C(10)-N(1)-H(1)  | 115.6    |
| C(11)-N(1)-H(1)  | 115.6    |
| C(11)-N(1)-C(10) | 128.8(4) |
| C(12)-N(2)-C(11) | 114.6(4) |
| C(12)-N(3)-C(13) | 114.1(4) |
| C(2)-C(1)-Br(1)  | 119.8(3) |
| C(6)-C(1)-Br(1)  | 119.7(4) |
| C(6)-C(1)-C(2)   | 120.5(4) |
| C(1)-C(2)-H(2)   | 120.2    |
| C(1)-C(2)-C(3)   | 119.5(4) |

|                  |          |
|------------------|----------|
| C(3)-C(2)-H(2)   | 120.2    |
| C(2)-C(3)-H(3)   | 119.4    |
| C(2)-C(3)-C(4)   | 121.2(4) |
| C(4)-C(3)-H(3)   | 119.4    |
| C(3)-C(4)-C(7)   | 120.8(4) |
| C(5)-C(4)-C(3)   | 117.8(4) |
| C(5)-C(4)-C(7)   | 121.4(4) |
| C(4)-C(5)-H(5)   | 119.4    |
| C(6)-C(5)-C(4)   | 121.2(4) |
| C(6)-C(5)-H(5)   | 119.4    |
| C(1)-C(6)-C(5)   | 119.9(4) |
| C(1)-C(6)-H(6)   | 120.1    |
| C(5)-C(6)-H(6)   | 120.1    |
| C(8)-C(7)-C(4)   | 121.6(4) |
| C(8)-C(7)-C(18)  | 116.7(4) |
| C(18)-C(7)-C(4)  | 121.7(4) |
| C(7)-C(8)-H(8)   | 118.9    |
| C(9)-C(8)-C(7)   | 122.1(4) |
| C(9)-C(8)-H(8)   | 118.9    |
| C(8)-C(9)-H(9)   | 119.9    |
| C(8)-C(9)-C(10)  | 120.3(4) |
| C(10)-C(9)-H(9)  | 119.9    |
| C(9)-C(10)-N(1)  | 123.1(4) |
| C(17)-C(10)-N(1) | 118.5(4) |
| C(17)-C(10)-C(9) | 118.3(4) |
| N(1)-C(11)-C(14) | 119.5(4) |
| N(2)-C(11)-N(1)  | 119.4(4) |
| N(2)-C(11)-C(14) | 121.1(4) |
| N(2)-C(12)-N(3)  | 130.6(5) |
| N(2)-C(12)-C(16) | 114.3(4) |

|                     |          |
|---------------------|----------|
| N(3)-C(12)-C(16)    | 115.1(4) |
| N(3)-C(13)-C(14)    | 121.3(4) |
| N(3)-C(13)-C(15)    | 115.7(4) |
| C(14)-C(13)-C(15)   | 123.0(5) |
| C(11)-C(14)-H(14)   | 120.9    |
| C(13)-C(14)-C(11)   | 118.1(5) |
| C(13)-C(14)-H(14)   | 120.9    |
| C(13)-C(15)-H(15A)  | 109.5    |
| C(13)-C(15)-H(15B)  | 109.5    |
| C(13)-C(15)-H(15C)  | 109.5    |
| H(15A)-C(15)-H(15B) | 109.5    |
| H(15A)-C(15)-H(15C) | 109.5    |
| H(15B)-C(15)-H(15C) | 109.5    |
| F(1)-C(16)-F(2)     | 108.1(6) |
| F(1)-C(16)-F(3)     | 105.6(6) |
| F(1)-C(16)-C(12)    | 114.6(5) |
| F(2)-C(16)-C(12)    | 112.9(5) |
| F(3)-C(16)-F(2)     | 103.4(6) |
| F(3)-C(16)-C(12)    | 111.3(6) |
| C(10)-C(17)-H(17)   | 119.4    |
| C(18)-C(17)-C(10)   | 121.3(4) |
| C(18)-C(17)-H(17)   | 119.4    |
| C(7)-C(18)-H(18)    | 119.4    |
| C(17)-C(18)-C(7)    | 121.3(4) |
| C(17)-C(18)-H(18)   | 119.4    |
| C(28)-N(4)-H(4)     | 115.3    |
| C(29)-N(4)-H(4)     | 115.3    |
| C(29)-N(4)-C(28)    | 129.5(4) |
| C(30)-N(5)-C(29)    | 114.6(4) |
| C(30)-N(6)-C(31)    | 115.1(4) |



|                   |          |
|-------------------|----------|
| C(20)-C(19)-Br(2) | 119.1(4) |
| C(24)-C(19)-Br(2) | 119.2(4) |
| C(24)-C(19)-C(20) | 121.7(4) |
| C(19)-C(20)-H(20) | 120.7    |
| C(19)-C(20)-C(21) | 118.5(4) |
| C(21)-C(20)-H(20) | 120.7    |
| C(20)-C(21)-H(21) | 119.3    |
| C(20)-C(21)-C(22) | 121.4(4) |
| C(22)-C(21)-H(21) | 119.3    |
| C(21)-C(22)-C(25) | 119.8(4) |
| C(23)-C(22)-C(21) | 118.0(4) |
| C(23)-C(22)-C(25) | 122.2(4) |
| C(22)-C(23)-H(23) | 119.3    |
| C(24)-C(23)-C(22) | 121.3(4) |
| C(24)-C(23)-H(23) | 119.3    |
| C(19)-C(24)-C(23) | 119.0(4) |
| C(19)-C(24)-H(24) | 120.5    |
| C(23)-C(24)-H(24) | 120.5    |
| C(26)-C(25)-C(22) | 121.2(4) |
| C(26)-C(25)-C(36) | 117.2(4) |
| C(36)-C(25)-C(22) | 121.5(4) |
| C(25)-C(26)-H(26) | 119.0    |
| C(27)-C(26)-C(25) | 121.9(4) |
| C(27)-C(26)-H(26) | 119.0    |
| C(26)-C(27)-H(27) | 120.0    |
| C(26)-C(27)-C(28) | 120.0(4) |
| C(28)-C(27)-H(27) | 120.0    |
| C(27)-C(28)-N(4)  | 116.6(4) |
| C(35)-C(28)-N(4)  | 124.3(4) |
| C(35)-C(28)-C(27) | 119.0(4) |

|                     |          |
|---------------------|----------|
| N(4)-C(29)-C(32)    | 120.3(4) |
| N(5)-C(29)-N(4)     | 118.2(4) |
| N(5)-C(29)-C(32)    | 121.4(4) |
| N(5)-C(30)-C(34)    | 114.4(4) |
| N(6)-C(30)-N(5)     | 129.7(5) |
| N(6)-C(30)-C(34)    | 115.8(4) |
| N(6)-C(31)-C(32)    | 120.8(4) |
| N(6)-C(31)-C(33)    | 117.1(4) |
| C(32)-C(31)-C(33)   | 122.2(4) |
| C(29)-C(32)-H(32)   | 120.8    |
| C(31)-C(32)-C(29)   | 118.4(4) |
| C(31)-C(32)-H(32)   | 120.8    |
| C(31)-C(33)-H(33A)  | 109.5    |
| C(31)-C(33)-H(33B)  | 109.5    |
| C(31)-C(33)-H(33C)  | 109.5    |
| H(33A)-C(33)-H(33B) | 109.5    |
| H(33A)-C(33)-H(33C) | 109.5    |
| H(33B)-C(33)-H(33C) | 109.5    |
| F(4)-C(34)-F(5)     | 108.0(5) |
| F(4)-C(34)-F(6)     | 105.6(5) |
| F(4)-C(34)-C(30)    | 114.8(5) |
| F(5)-C(34)-F(6)     | 104.4(5) |
| F(5)-C(34)-C(30)    | 113.9(5) |
| F(6)-C(34)-C(30)    | 109.3(5) |
| C(28)-C(35)-H(35)   | 119.9    |
| C(28)-C(35)-C(36)   | 120.2(4) |
| C(36)-C(35)-H(35)   | 119.9    |
| C(25)-C(36)-H(36)   | 119.2    |
| C(35)-C(36)-C(25)   | 121.5(4) |
| C(35)-C(36)-H(36)   | 119.2    |

|                   |          |
|-------------------|----------|
| C(46)-N(7)-H(7)   | 115.0    |
| C(47)-N(7)-H(7)   | 115.0    |
| C(47)-N(7)-C(46)  | 129.9(4) |
| C(48)-N(8)-C(47)  | 114.3(4) |
| C(48)-N(9)-C(49)  | 114.6(4) |
| C(38)-C(37)-Br(3) | 119.1(4) |
| C(38)-C(37)-C(42) | 120.9(4) |
| C(42)-C(37)-Br(3) | 119.9(4) |
| C(37)-C(38)-H(38) | 120.3    |
| C(37)-C(38)-C(39) | 119.5(5) |
| C(39)-C(38)-H(38) | 120.3    |
| C(38)-C(39)-H(39) | 119.3    |
| C(38)-C(39)-C(40) | 121.5(4) |
| C(40)-C(39)-H(39) | 119.3    |
| C(39)-C(40)-C(41) | 117.4(4) |
| C(39)-C(40)-C(43) | 121.1(4) |
| C(41)-C(40)-C(43) | 121.4(4) |
| C(40)-C(41)-H(41) | 119.4    |
| C(42)-C(41)-C(40) | 121.2(5) |
| C(42)-C(41)-H(41) | 119.4    |
| C(37)-C(42)-C(41) | 119.3(5) |
| C(37)-C(42)-H(42) | 120.4    |
| C(41)-C(42)-H(42) | 120.4    |
| C(44)-C(43)-C(40) | 121.6(4) |
| C(44)-C(43)-C(54) | 116.9(4) |
| C(54)-C(43)-C(40) | 121.4(4) |
| C(43)-C(44)-H(44) | 118.8    |
| C(45)-C(44)-C(43) | 122.4(4) |
| C(45)-C(44)-H(44) | 118.8    |
| C(44)-C(45)-H(45) | 120.0    |

|                     |          |
|---------------------|----------|
| C(44)-C(45)-C(46)   | 119.9(4) |
| C(46)-C(45)-H(45)   | 120.0    |
| C(45)-C(46)-N(7)    | 124.5(4) |
| C(53)-C(46)-N(7)    | 117.4(4) |
| C(53)-C(46)-C(45)   | 118.1(4) |
| N(7)-C(47)-C(50)    | 118.9(4) |
| N(8)-C(47)-N(7)     | 120.0(4) |
| N(8)-C(47)-C(50)    | 121.1(4) |
| N(8)-C(48)-C(52)    | 114.2(4) |
| N(9)-C(48)-N(8)     | 130.5(4) |
| N(9)-C(48)-C(52)    | 115.2(4) |
| N(9)-C(49)-C(50)    | 121.1(4) |
| N(9)-C(49)-C(51)    | 116.7(4) |
| C(50)-C(49)-C(51)   | 122.3(4) |
| C(47)-C(50)-H(50)   | 120.8    |
| C(49)-C(50)-C(47)   | 118.3(4) |
| C(49)-C(50)-H(50)   | 120.8    |
| C(49)-C(51)-H(51A)  | 109.5    |
| C(49)-C(51)-H(51B)  | 109.5    |
| C(49)-C(51)-H(51C)  | 109.5    |
| H(51A)-C(51)-H(51B) | 109.5    |
| H(51A)-C(51)-H(51C) | 109.5    |
| H(51B)-C(51)-H(51C) | 109.5    |
| F(7)-C(52)-C(48)    | 112.3(4) |
| F(8)-C(52)-F(7)     | 104.9(4) |
| F(8)-C(52)-C(48)    | 113.7(4) |
| F(9)-C(52)-F(7)     | 105.3(4) |
| F(9)-C(52)-F(8)     | 107.7(4) |
| F(9)-C(52)-C(48)    | 112.4(4) |
| C(46)-C(53)-H(53)   | 119.2    |

|                   |          |
|-------------------|----------|
| C(54)-C(53)-C(46) | 121.6(4) |
| C(54)-C(53)-H(53) | 119.2    |
| C(43)-C(54)-H(54) | 119.4    |
| C(53)-C(54)-C(43) | 121.1(4) |
| C(53)-C(54)-H(54) | 119.4    |
| C(64)-N(10)-H(10) | 115.1    |
| C(65)-N(10)-H(10) | 115.1    |
| C(65)-N(10)-C(64) | 129.8(4) |
| C(66)-N(11)-C(65) | 114.7(4) |
| C(66)-N(12)-C(67) | 114.2(4) |
| C(56)-C(55)-Br(4) | 118.8(3) |
| C(60)-C(55)-Br(4) | 120.4(4) |
| C(60)-C(55)-C(56) | 120.8(4) |
| C(55)-C(56)-H(56) | 120.3    |
| C(55)-C(56)-C(57) | 119.5(4) |
| C(57)-C(56)-H(56) | 120.3    |
| C(56)-C(57)-H(57) | 119.3    |
| C(56)-C(57)-C(58) | 121.5(4) |
| C(58)-C(57)-H(57) | 119.3    |
| C(57)-C(58)-C(61) | 120.4(4) |
| C(59)-C(58)-C(57) | 117.5(4) |
| C(59)-C(58)-C(61) | 122.1(4) |
| C(58)-C(59)-H(59) | 119.4    |
| C(60)-C(59)-C(58) | 121.3(4) |
| C(60)-C(59)-H(59) | 119.4    |
| C(55)-C(60)-C(59) | 119.4(4) |
| C(55)-C(60)-H(60) | 120.3    |
| C(59)-C(60)-H(60) | 120.3    |
| C(62)-C(61)-C(58) | 121.5(4) |
| C(62)-C(61)-C(72) | 117.3(4) |

|                     |          |
|---------------------|----------|
| C(72)-C(61)-C(58)   | 121.1(4) |
| C(61)-C(62)-H(62)   | 119.2    |
| C(63)-C(62)-C(61)   | 121.6(4) |
| C(63)-C(62)-H(62)   | 119.2    |
| C(62)-C(63)-H(63)   | 119.6    |
| C(62)-C(63)-C(64)   | 120.7(4) |
| C(64)-C(63)-H(63)   | 119.6    |
| C(63)-C(64)-N(10)   | 117.5(4) |
| C(63)-C(64)-C(71)   | 118.6(4) |
| C(71)-C(64)-N(10)   | 123.9(4) |
| N(10)-C(65)-C(68)   | 119.0(4) |
| N(11)-C(65)-N(10)   | 120.1(4) |
| N(11)-C(65)-C(68)   | 120.9(4) |
| N(11)-C(66)-C(70)   | 114.9(4) |
| N(12)-C(66)-N(11)   | 130.1(4) |
| N(12)-C(66)-C(70)   | 115.0(4) |
| N(12)-C(67)-C(68)   | 121.7(4) |
| N(12)-C(67)-C(69)   | 115.9(4) |
| C(68)-C(67)-C(69)   | 122.4(4) |
| C(65)-C(68)-H(68)   | 120.8    |
| C(67)-C(68)-C(65)   | 118.3(4) |
| C(67)-C(68)-H(68)   | 120.8    |
| C(67)-C(69)-H(69A)  | 109.5    |
| C(67)-C(69)-H(69B)  | 109.5    |
| C(67)-C(69)-H(69C)  | 109.5    |
| H(69A)-C(69)-H(69B) | 109.5    |
| H(69A)-C(69)-H(69C) | 109.5    |
| H(69B)-C(69)-H(69C) | 109.5    |
| F(10)-C(70)-F(11)   | 102.0(5) |
| F(10)-C(70)-C(66)   | 114.3(4) |

|                   |          |
|-------------------|----------|
| F(11)-C(70)-C(66) | 113.7(5) |
| F(12)-C(70)-F(10) | 108.1(5) |
| F(12)-C(70)-F(11) | 103.8(5) |
| F(12)-C(70)-C(66) | 113.7(5) |
| C(64)-C(71)-H(71) | 120.1    |
| C(72)-C(71)-C(64) | 119.8(4) |
| C(72)-C(71)-H(71) | 120.1    |
| C(61)-C(72)-H(72) | 119.0    |
| C(71)-C(72)-C(61) | 121.9(4) |
| C(71)-C(72)-H(72) | 119.0    |

---

Symmetry transformations used to generate equivalent atoms:

**Table S6.** Anisotropic displacement parameters ( $\text{\AA}^2 \times 10^3$ ) for **3m**. The anisotropic displacement factor exponent takes the form:  $-2^2 [ h^2 a^* 2U^{11} + \dots + 2 h k a^* b^* U^{12} ]$

---

|       | U <sup>11</sup> | U <sup>22</sup> | U <sup>33</sup> | U <sup>23</sup> | U <sup>13</sup> | U <sup>12</sup> |
|-------|-----------------|-----------------|-----------------|-----------------|-----------------|-----------------|
| Br(1) | 42(1)           | 32(1)           | 60(1)           | 4(1)            | 28(1)           | 6(1)            |
| F(1)  | 141(4)          | 176(5)          | 41(2)           | -18(3)          | 10(2)           | 103(4)          |
| F(2)  | 76(3)           | 265(7)          | 58(3)           | -23(3)          | 0(2)            | 92(4)           |
| F(3)  | 232(7)          | 150(5)          | 65(3)           | 52(3)           | 21(4)           | -3(5)           |
| N(1)  | 38(2)           | 34(2)           | 35(2)           | -2(2)           | 15(2)           | 9(2)            |
| N(2)  | 31(2)           | 45(3)           | 37(2)           | -3(2)           | 17(2)           | 9(2)            |
| N(3)  | 32(2)           | 37(3)           | 43(3)           | -4(2)           | 19(2)           | 2(2)            |
| C(1)  | 30(2)           | 25(3)           | 44(3)           | 0(2)            | 22(2)           | -1(2)           |
| C(2)  | 46(3)           | 34(3)           | 37(3)           | -5(2)           | 25(2)           | 0(2)            |
| C(3)  | 38(3)           | 36(3)           | 33(3)           | 2(2)            | 20(2)           | 3(2)            |
| C(4)  | 31(2)           | 29(3)           | 32(3)           | 1(2)            | 17(2)           | -4(2)           |

|       |        |        |       |        |       |        |
|-------|--------|--------|-------|--------|-------|--------|
| C(5)  | 41(3)  | 34(3)  | 32(3) | -5(2)  | 19(2) | -2(2)  |
| C(6)  | 34(3)  | 32(3)  | 38(3) | 6(2)   | 14(2) | 1(2)   |
| C(7)  | 25(2)  | 32(3)  | 34(3) | 1(2)   | 17(2) | -2(2)  |
| C(8)  | 23(2)  | 37(3)  | 34(3) | -10(2) | 12(2) | -4(2)  |
| C(9)  | 32(3)  | 41(3)  | 40(3) | -8(2)  | 20(2) | -4(2)  |
| C(10) | 31(2)  | 24(3)  | 35(3) | -4(2)  | 17(2) | -2(2)  |
| C(11) | 32(3)  | 28(3)  | 49(3) | -5(2)  | 25(2) | -2(2)  |
| C(12) | 33(3)  | 48(3)  | 44(3) | -3(3)  | 21(2) | 6(2)   |
| C(13) | 30(2)  | 35(3)  | 48(3) | 0(2)   | 25(2) | -3(2)  |
| C(14) | 36(3)  | 33(3)  | 41(3) | 4(2)   | 21(2) | 4(2)   |
| C(15) | 49(3)  | 38(3)  | 56(3) | 4(3)   | 28(3) | 14(3)  |
| C(16) | 63(4)  | 92(6)  | 41(4) | 4(4)   | 20(3) | 38(4)  |
| C(17) | 27(2)  | 42(3)  | 36(3) | -1(2)  | 13(2) | 2(2)   |
| C(18) | 36(3)  | 35(3)  | 30(3) | -6(2)  | 17(2) | -3(2)  |
| Br(2) | 42(1)  | 35(1)  | 80(1) | 4(1)   | 31(1) | -9(1)  |
| F(4)  | 105(3) | 112(3) | 43(2) | -11(2) | 8(2)  | -72(3) |
| F(5)  | 86(3)  | 217(5) | 48(2) | 7(3)   | 22(2) | -80(3) |
| F(6)  | 216(6) | 97(4)  | 54(3) | 23(2)  | 23(3) | 42(4)  |
| N(4)  | 37(2)  | 37(2)  | 32(2) | 1(2)   | 11(2) | -10(2) |
| N(5)  | 30(2)  | 38(2)  | 35(2) | -5(2)  | 14(2) | -13(2) |
| N(6)  | 29(2)  | 36(2)  | 44(3) | -2(2)  | 15(2) | -8(2)  |
| C(19) | 26(2)  | 27(3)  | 52(3) | 0(2)   | 19(2) | -1(2)  |
| C(20) | 25(2)  | 31(3)  | 46(3) | -4(2)  | 12(2) | -5(2)  |
| C(21) | 28(2)  | 34(3)  | 31(3) | 2(2)   | 13(2) | -1(2)  |
| C(22) | 22(2)  | 27(3)  | 35(3) | -1(2)  | 13(2) | 0(2)   |
| C(23) | 35(3)  | 34(3)  | 36(3) | -2(2)  | 14(2) | -1(2)  |
| C(24) | 43(3)  | 28(3)  | 42(3) | 6(2)   | 24(2) | 2(2)   |
| C(25) | 22(2)  | 28(3)  | 27(2) | -4(2)  | 9(2)  | -3(2)  |
| C(26) | 22(2)  | 40(3)  | 31(3) | -1(2)  | 9(2)  | -5(2)  |
| C(27) | 28(2)  | 37(3)  | 26(2) | 2(2)   | 8(2)  | -1(2)  |



|       |        |        |        |        |       |        |
|-------|--------|--------|--------|--------|-------|--------|
| C(28) | 25(2)  | 25(3)  | 27(2)  | -5(2)  | 8(2)  | -6(2)  |
| C(29) | 24(2)  | 28(3)  | 43(3)  | -6(2)  | 15(2) | -5(2)  |
| C(30) | 36(3)  | 35(3)  | 41(3)  | -7(2)  | 16(2) | -11(2) |
| C(31) | 27(2)  | 20(3)  | 53(3)  | 3(2)   | 18(2) | 0(2)   |
| C(32) | 31(2)  | 33(3)  | 37(3)  | 4(2)   | 13(2) | -3(2)  |
| C(33) | 33(3)  | 31(3)  | 58(3)  | -1(3)  | 17(2) | -5(2)  |
| C(34) | 62(4)  | 60(4)  | 41(3)  | -4(3)  | 13(3) | -32(3) |
| C(35) | 27(2)  | 31(3)  | 33(3)  | 0(2)   | 4(2)  | -7(2)  |
| C(36) | 36(3)  | 33(3)  | 30(3)  | 0(2)   | 12(2) | -4(2)  |
| Br(3) | 57(1)  | 42(1)  | 84(1)  | 7(1)   | 46(1) | 12(1)  |
| F(7)  | 34(2)  | 47(2)  | 78(2)  | 4(2)   | 21(2) | -7(1)  |
| F(8)  | 56(2)  | 32(2)  | 147(3) | -12(2) | 46(2) | -6(2)  |
| F(9)  | 104(3) | 128(3) | 46(2)  | -5(2)  | 33(2) | -73(3) |
| N(7)  | 23(2)  | 29(2)  | 57(3)  | -1(2)  | 16(2) | -5(2)  |
| N(8)  | 23(2)  | 29(2)  | 32(2)  | 0(2)   | 10(2) | 0(2)   |
| N(9)  | 27(2)  | 33(2)  | 35(2)  | 0(2)   | 10(2) | 4(2)   |
| C(37) | 43(3)  | 24(3)  | 54(3)  | 7(2)   | 31(3) | 7(2)   |
| C(38) | 38(3)  | 34(3)  | 46(3)  | 6(3)   | 22(2) | 2(2)   |
| C(39) | 38(3)  | 26(3)  | 35(3)  | 3(2)   | 17(2) | 3(2)   |
| C(40) | 33(2)  | 23(3)  | 32(3)  | 5(2)   | 15(2) | 0(2)   |
| C(41) | 38(3)  | 37(3)  | 52(3)  | -4(3)  | 21(2) | -2(2)  |
| C(42) | 55(3)  | 31(3)  | 55(3)  | -8(3)  | 31(3) | -4(3)  |
| C(43) | 33(2)  | 25(3)  | 30(3)  | 0(2)   | 13(2) | -4(2)  |
| C(44) | 26(2)  | 30(3)  | 31(3)  | -3(2)  | 10(2) | -3(2)  |
| C(45) | 29(2)  | 29(3)  | 35(3)  | -6(2)  | 13(2) | -4(2)  |
| C(46) | 30(2)  | 27(3)  | 34(3)  | 1(2)   | 15(2) | -3(2)  |
| C(47) | 26(2)  | 27(3)  | 29(3)  | 0(2)   | 10(2) | -2(2)  |
| C(48) | 28(2)  | 31(3)  | 27(3)  | 0(2)   | 11(2) | -1(2)  |
| C(49) | 26(2)  | 40(3)  | 33(3)  | -6(2)  | 11(2) | 4(2)   |
| C(50) | 21(2)  | 45(3)  | 36(3)  | -1(2)  | 9(2)  | -7(2)  |

|       |        |        |        |        |        |         |
|-------|--------|--------|--------|--------|--------|---------|
| C(51) | 31(3)  | 49(3)  | 51(3)  | -4(3)  | 18(2)  | 7(2)    |
| C(52) | 34(3)  | 35(3)  | 46(3)  | -3(2)  | 18(2)  | -3(2)   |
| C(53) | 25(2)  | 27(3)  | 57(3)  | -2(2)  | 8(2)   | -6(2)   |
| C(54) | 37(3)  | 22(3)  | 51(3)  | -3(2)  | 12(2)  | -5(2)   |
| Br(4) | 40(1)  | 55(1)  | 59(1)  | -9(1)  | 18(1)  | 13(1)   |
| F(10) | 140(4) | 79(3)  | 217(5) | -81(3) | 137(4) | -67(3)  |
| F(11) | 46(2)  | 71(3)  | 292(7) | 29(4)  | 57(3)  | -9(2)   |
| F(12) | 163(4) | 214(5) | 71(3)  | 3(3)   | 41(3)  | -145(4) |
| N(10) | 29(2)  | 28(2)  | 54(3)  | 3(2)   | 23(2)  | -2(2)   |
| N(11) | 28(2)  | 32(2)  | 35(2)  | -2(2)  | 15(2)  | 2(2)    |
| N(12) | 33(2)  | 36(2)  | 40(2)  | -1(2)  | 18(2)  | 6(2)    |
| C(55) | 34(3)  | 37(3)  | 32(3)  | -2(2)  | 14(2)  | 5(2)    |
| C(56) | 33(3)  | 43(3)  | 30(3)  | -4(2)  | 17(2)  | -2(2)   |
| C(57) | 36(3)  | 24(3)  | 37(3)  | -1(2)  | 18(2)  | -4(2)   |
| C(58) | 30(2)  | 31(3)  | 26(2)  | 0(2)   | 11(2)  | -3(2)   |
| C(59) | 34(3)  | 30(3)  | 35(3)  | -2(2)  | 15(2)  | -4(2)   |
| C(60) | 45(3)  | 27(3)  | 39(3)  | -5(2)  | 19(2)  | 1(2)    |
| C(61) | 26(2)  | 25(3)  | 29(2)  | 2(2)   | 9(2)   | -3(2)   |
| C(62) | 30(2)  | 24(3)  | 45(3)  | 6(2)   | 16(2)  | 0(2)    |
| C(63) | 31(3)  | 32(3)  | 49(3)  | 7(2)   | 21(2)  | -6(2)   |
| C(64) | 26(2)  | 31(3)  | 34(3)  | 1(2)   | 14(2)  | -1(2)   |
| C(65) | 31(2)  | 32(3)  | 34(3)  | 3(2)   | 18(2)  | 2(2)    |
| C(66) | 35(3)  | 34(3)  | 32(3)  | -1(2)  | 17(2)  | 1(2)    |
| C(67) | 27(2)  | 48(3)  | 31(3)  | 3(2)   | 12(2)  | 6(2)    |
| C(68) | 31(2)  | 37(3)  | 42(3)  | 3(2)   | 18(2)  | -2(2)   |
| C(69) | 41(3)  | 53(4)  | 51(3)  | 0(3)   | 23(3)  | 12(3)   |
| C(70) | 48(3)  | 31(3)  | 68(4)  | -4(3)  | 39(3)  | -3(3)   |
| C(71) | 35(3)  | 24(3)  | 36(3)  | 1(2)   | 16(2)  | -4(2)   |
| C(72) | 33(2)  | 32(3)  | 35(3)  | 4(2)   | 19(2)  | -1(2)   |

**Table S7.** Hydrogen coordinates (  $\times 10^4$ ) and isotropic displacement parameters ( $\text{\AA}^2 \times 10^3$ ) for **3m**.

|        | x     | y     | z    | U(eq) |
|--------|-------|-------|------|-------|
| H(1)   | 4305  | 11139 | 1980 | 43    |
| H(2)   | 6574  | 5528  | 1625 | 43    |
| H(3)   | 5903  | 7024  | 1599 | 40    |
| H(5)   | 6663  | 7176  | 3242 | 41    |
| H(6)   | 7344  | 5707  | 3265 | 42    |
| H(8)   | 6361  | 9086  | 3070 | 37    |
| H(9)   | 5696  | 10570 | 3054 | 43    |
| H(14)  | 3832  | 12725 | 2195 | 42    |
| H(15A) | 3310  | 14070 | 3064 | 68    |
| H(15B) | 3333  | 14261 | 2481 | 68    |
| H(15C) | 3820  | 14907 | 3005 | 68    |
| H(17)  | 4393  | 9207  | 1695 | 42    |
| H(18)  | 5051  | 7713  | 1716 | 39    |
| H(4)   | 31    | -479  | 2991 | 43    |
| H(20)  | 2385  | 5380  | 3404 | 41    |
| H(21)  | 1805  | 3721  | 3373 | 37    |
| H(23)  | 1084  | 3806  | 1728 | 42    |
| H(24)  | 1673  | 5448  | 1755 | 43    |
| H(26)  | 1630  | 1807  | 3229 | 38    |
| H(27)  | 1026  | 253   | 3264 | 37    |
| H(32)  | -763  | -1829 | 2827 | 41    |
| H(33A) | -2181 | -2873 | 2073 | 61    |
| H(33B) | -1583 | -3196 | 2606 | 61    |
| H(33C) | -1714 | -3847 | 2043 | 61    |

|        |      |       |      |    |
|--------|------|-------|------|----|
| H(35)  | -337 | 1344  | 1863 | 39 |
| H(36)  | 272  | 2904  | 1836 | 40 |
| H(7)   | 7570 | 7234  | 848  | 44 |
| H(38)  | 3697 | 9741  | 122  | 46 |
| H(39)  | 4528 | 8706  | 97   | 39 |
| H(41)  | 5695 | 10681 | 1316 | 50 |
| H(42)  | 4859 | 11737 | 1327 | 53 |
| H(44)  | 5228 | 7444  | 313  | 35 |
| H(45)  | 6044 | 6284  | 353  | 37 |
| H(50)  | 8207 | 5759  | 797  | 42 |
| H(51A) | 8722 | 2965  | 1050 | 65 |
| H(51B) | 8855 | 4162  | 813  | 65 |
| H(51C) | 8444 | 3181  | 406  | 65 |
| H(53)  | 7228 | 8815  | 1187 | 46 |
| H(54)  | 6413 | 9950  | 1160 | 46 |
| H(10)  | 895  | 8686  | 786  | 42 |
| H(56)  | 4618 | 6864  | 831  | 41 |
| H(57)  | 3752 | 7899  | 772  | 38 |
| H(59)  | 2772 | 4924  | 485  | 39 |
| H(60)  | 3647 | 3884  | 555  | 44 |
| H(62)  | 2280 | 5937  | 955  | 39 |
| H(63)  | 1488 | 7022  | 1010 | 43 |
| H(68)  | 194  | 10147 | 714  | 43 |
| H(69A) | -139 | 13104 | 838  | 70 |
| H(69B) | -409 | 11823 | 814  | 70 |
| H(69C) | -468 | 12458 | 265  | 70 |
| H(71)  | 2015 | 9782  | 364  | 38 |
| H(72)  | 2798 | 8664  | 299  | 38 |

**Table S8.** Torsion angles [°] for **3m**.

---

|                        |           |
|------------------------|-----------|
| Br(1)-C(1)-C(2)-C(3)   | -178.6(3) |
| Br(1)-C(1)-C(6)-C(5)   | 179.2(3)  |
| N(1)-C(10)-C(17)-C(18) | 176.5(4)  |
| N(1)-C(11)-C(14)-C(13) | 178.2(4)  |
| N(2)-C(11)-C(14)-C(13) | -2.3(7)   |
| N(2)-C(12)-C(16)-F(1)  | 168.8(6)  |
| N(2)-C(12)-C(16)-F(2)  | 44.4(8)   |
| N(2)-C(12)-C(16)-F(3)  | -71.4(7)  |
| N(3)-C(12)-C(16)-F(1)  | -12.6(9)  |
| N(3)-C(12)-C(16)-F(2)  | -137.0(6) |
| N(3)-C(12)-C(16)-F(3)  | 107.1(6)  |
| N(3)-C(13)-C(14)-C(11) | 0.1(7)    |
| C(1)-C(2)-C(3)-C(4)    | -0.5(7)   |
| C(2)-C(1)-C(6)-C(5)    | 0.4(7)    |
| C(2)-C(3)-C(4)-C(5)    | 0.2(7)    |
| C(2)-C(3)-C(4)-C(7)    | 179.2(4)  |
| C(3)-C(4)-C(5)-C(6)    | 0.5(7)    |
| C(3)-C(4)-C(7)-C(8)    | -147.4(4) |
| C(3)-C(4)-C(7)-C(18)   | 32.9(6)   |
| C(4)-C(5)-C(6)-C(1)    | -0.7(7)   |
| C(4)-C(7)-C(8)-C(9)    | -179.1(4) |
| C(4)-C(7)-C(18)-C(17)  | 179.5(4)  |
| C(5)-C(4)-C(7)-C(8)    | 31.5(6)   |
| C(5)-C(4)-C(7)-C(18)   | -148.1(4) |
| C(6)-C(1)-C(2)-C(3)    | 0.3(7)    |
| C(7)-C(4)-C(5)-C(6)    | -178.5(4) |
| C(7)-C(8)-C(9)-C(10)   | -0.7(7)   |
| C(8)-C(7)-C(18)-C(17)  | -0.2(6)   |

|                         |           |
|-------------------------|-----------|
| C(8)-C(9)-C(10)-N(1)    | -176.0(4) |
| C(8)-C(9)-C(10)-C(17)   | 0.4(7)    |
| C(9)-C(10)-C(17)-C(18)  | 0.0(7)    |
| C(10)-N(1)-C(11)-N(2)   | -2.1(7)   |
| C(10)-N(1)-C(11)-C(14)  | 177.3(4)  |
| C(10)-C(17)-C(18)-C(7)  | -0.1(7)   |
| C(11)-N(1)-C(10)-C(9)   | -31.9(7)  |
| C(11)-N(1)-C(10)-C(17)  | 151.7(4)  |
| C(11)-N(2)-C(12)-N(3)   | -1.6(8)   |
| C(11)-N(2)-C(12)-C(16)  | 176.6(5)  |
| C(12)-N(2)-C(11)-N(1)   | -177.6(4) |
| C(12)-N(2)-C(11)-C(14)  | 2.9(6)    |
| C(12)-N(3)-C(13)-C(14)  | 1.2(6)    |
| C(12)-N(3)-C(13)-C(15)  | -177.7(4) |
| C(13)-N(3)-C(12)-N(2)   | -0.5(7)   |
| C(13)-N(3)-C(12)-C(16)  | -178.7(5) |
| C(15)-C(13)-C(14)-C(11) | 178.9(4)  |
| C(18)-C(7)-C(8)-C(9)    | 0.6(6)    |
| Br(2)-C(19)-C(20)-C(21) | -178.2(3) |
| Br(2)-C(19)-C(24)-C(23) | 178.7(3)  |
| N(4)-C(28)-C(35)-C(36)  | 173.7(4)  |
| N(4)-C(29)-C(32)-C(31)  | -179.3(4) |
| N(5)-C(29)-C(32)-C(31)  | -0.3(7)   |
| N(5)-C(30)-C(34)-F(4)   | 165.5(5)  |
| N(5)-C(30)-C(34)-F(5)   | 40.3(7)   |
| N(5)-C(30)-C(34)-F(6)   | -76.0(6)  |
| N(6)-C(30)-C(34)-F(4)   | -17.3(8)  |
| N(6)-C(30)-C(34)-F(5)   | -142.6(5) |
| N(6)-C(30)-C(34)-F(6)   | 101.2(6)  |
| N(6)-C(31)-C(32)-C(29)  | -0.4(7)   |

|                         |           |
|-------------------------|-----------|
| C(19)-C(20)-C(21)-C(22) | -0.6(6)   |
| C(20)-C(19)-C(24)-C(23) | -0.6(7)   |
| C(20)-C(21)-C(22)-C(23) | -0.3(6)   |
| C(20)-C(21)-C(22)-C(25) | -179.2(4) |
| C(21)-C(22)-C(23)-C(24) | 0.7(6)    |
| C(21)-C(22)-C(25)-C(26) | -31.0(6)  |
| C(21)-C(22)-C(25)-C(36) | 146.0(4)  |
| C(22)-C(23)-C(24)-C(19) | -0.3(7)   |
| C(22)-C(25)-C(26)-C(27) | 175.1(4)  |
| C(22)-C(25)-C(36)-C(35) | -175.2(4) |
| C(23)-C(22)-C(25)-C(26) | 150.2(4)  |
| C(23)-C(22)-C(25)-C(36) | -32.8(6)  |
| C(24)-C(19)-C(20)-C(21) | 1.0(7)    |
| C(25)-C(22)-C(23)-C(24) | 179.6(4)  |
| C(25)-C(26)-C(27)-C(28) | 0.0(7)    |
| C(26)-C(25)-C(36)-C(35) | 1.9(6)    |
| C(26)-C(27)-C(28)-N(4)  | -174.1(4) |
| C(26)-C(27)-C(28)-C(35) | 2.2(7)    |
| C(27)-C(28)-C(35)-C(36) | -2.4(7)   |
| C(28)-N(4)-C(29)-N(5)   | 4.4(7)    |
| C(28)-N(4)-C(29)-C(32)  | -176.6(4) |
| C(28)-C(35)-C(36)-C(25) | 0.3(7)    |
| C(29)-N(4)-C(28)-C(27)  | -158.3(4) |
| C(29)-N(4)-C(28)-C(35)  | 25.5(7)   |
| C(29)-N(5)-C(30)-N(6)   | -2.3(7)   |
| C(29)-N(5)-C(30)-C(34)  | 174.4(5)  |
| C(30)-N(5)-C(29)-N(4)   | -179.5(4) |
| C(30)-N(5)-C(29)-C(32)  | 1.5(6)    |
| C(30)-N(6)-C(31)-C(32)  | -0.1(6)   |
| C(30)-N(6)-C(31)-C(33)  | 179.4(4)  |

|                         |           |
|-------------------------|-----------|
| C(31)-N(6)-C(30)-N(5)   | 1.6(7)    |
| C(31)-N(6)-C(30)-C(34)  | -175.1(5) |
| C(33)-C(31)-C(32)-C(29) | -179.8(4) |
| C(36)-C(25)-C(26)-C(27) | -2.1(6)   |
| Br(3)-C(37)-C(38)-C(39) | -173.2(3) |
| Br(3)-C(37)-C(42)-C(41) | 172.6(4)  |
| N(7)-C(46)-C(53)-C(54)  | 178.6(4)  |
| N(7)-C(47)-C(50)-C(49)  | 179.6(4)  |
| N(8)-C(47)-C(50)-C(49)  | 0.0(7)    |
| N(8)-C(48)-C(52)-F(7)   | 43.9(6)   |
| N(8)-C(48)-C(52)-F(8)   | 162.8(4)  |
| N(8)-C(48)-C(52)-F(9)   | -74.6(5)  |
| N(9)-C(48)-C(52)-F(7)   | -138.0(4) |
| N(9)-C(48)-C(52)-F(8)   | -19.1(6)  |
| N(9)-C(48)-C(52)-F(9)   | 103.6(5)  |
| N(9)-C(49)-C(50)-C(47)  | -0.8(7)   |
| C(37)-C(38)-C(39)-C(40) | 0.2(7)    |
| C(38)-C(37)-C(42)-C(41) | -4.6(7)   |
| C(38)-C(39)-C(40)-C(41) | -3.6(7)   |
| C(38)-C(39)-C(40)-C(43) | 175.7(4)  |
| C(39)-C(40)-C(41)-C(42) | 3.0(7)    |
| C(39)-C(40)-C(43)-C(44) | -17.9(6)  |
| C(39)-C(40)-C(43)-C(54) | 164.7(4)  |
| C(40)-C(41)-C(42)-C(37) | 1.0(8)    |
| C(40)-C(43)-C(44)-C(45) | -177.4(4) |
| C(40)-C(43)-C(54)-C(53) | 178.1(4)  |
| C(41)-C(40)-C(43)-C(44) | 161.4(4)  |
| C(41)-C(40)-C(43)-C(54) | -16.0(7)  |
| C(42)-C(37)-C(38)-C(39) | 4.0(7)    |
| C(43)-C(40)-C(41)-C(42) | -176.4(4) |



|                         |           |
|-------------------------|-----------|
| C(43)-C(44)-C(45)-C(46) | 0.1(7)    |
| C(44)-C(43)-C(54)-C(53) | 0.6(7)    |
| C(44)-C(45)-C(46)-N(7)  | -177.7(4) |
| C(44)-C(45)-C(46)-C(53) | -1.0(7)   |
| C(45)-C(46)-C(53)-C(54) | 1.7(7)    |
| C(46)-N(7)-C(47)-N(8)   | -5.7(7)   |
| C(46)-N(7)-C(47)-C(50)  | 174.7(4)  |
| C(46)-C(53)-C(54)-C(43) | -1.5(8)   |
| C(47)-N(7)-C(46)-C(45)  | -28.0(7)  |
| C(47)-N(7)-C(46)-C(53)  | 155.3(5)  |
| C(47)-N(8)-C(48)-N(9)   | -0.2(7)   |
| C(47)-N(8)-C(48)-C(52)  | 177.6(4)  |
| C(48)-N(8)-C(47)-N(7)   | -179.1(4) |
| C(48)-N(8)-C(47)-C(50)  | 0.5(6)    |
| C(48)-N(9)-C(49)-C(50)  | 1.0(6)    |
| C(48)-N(9)-C(49)-C(51)  | -177.9(4) |
| C(49)-N(9)-C(48)-N(8)   | -0.5(7)   |
| C(49)-N(9)-C(48)-C(52)  | -178.3(4) |
| C(51)-C(49)-C(50)-C(47) | 178.0(4)  |
| C(54)-C(43)-C(44)-C(45) | 0.1(7)    |
| Br(4)-C(55)-C(56)-C(57) | -176.6(3) |
| Br(4)-C(55)-C(60)-C(59) | 177.0(3)  |
| N(10)-C(64)-C(71)-C(72) | -178.9(4) |
| N(10)-C(65)-C(68)-C(67) | -179.6(4) |
| N(11)-C(65)-C(68)-C(67) | 0.1(7)    |
| N(11)-C(66)-C(70)-F(10) | -143.3(5) |
| N(11)-C(66)-C(70)-F(11) | -26.8(7)  |
| N(11)-C(66)-C(70)-F(12) | 91.8(6)   |
| N(12)-C(66)-C(70)-F(10) | 37.9(7)   |
| N(12)-C(66)-C(70)-F(11) | 154.4(5)  |

|                         |           |
|-------------------------|-----------|
| N(12)-C(66)-C(70)-F(12) | -87.0(6)  |
| N(12)-C(67)-C(68)-C(65) | -2.3(7)   |
| C(55)-C(56)-C(57)-C(58) | -0.6(7)   |
| C(56)-C(55)-C(60)-C(59) | -2.1(7)   |
| C(56)-C(57)-C(58)-C(59) | -1.6(7)   |
| C(56)-C(57)-C(58)-C(61) | 175.9(4)  |
| C(57)-C(58)-C(59)-C(60) | 2.0(7)    |
| C(57)-C(58)-C(61)-C(62) | -143.6(4) |
| C(57)-C(58)-C(61)-C(72) | 33.2(6)   |
| C(58)-C(59)-C(60)-C(55) | -0.2(7)   |
| C(58)-C(61)-C(62)-C(63) | 175.3(4)  |
| C(58)-C(61)-C(72)-C(71) | -174.8(4) |
| C(59)-C(58)-C(61)-C(62) | 33.7(7)   |
| C(59)-C(58)-C(61)-C(72) | -149.5(4) |
| C(60)-C(55)-C(56)-C(57) | 2.5(7)    |
| C(61)-C(58)-C(59)-C(60) | -175.4(4) |
| C(61)-C(62)-C(63)-C(64) | -0.3(7)   |
| C(62)-C(61)-C(72)-C(71) | 2.2(7)    |
| C(62)-C(63)-C(64)-N(10) | 179.6(4)  |
| C(62)-C(63)-C(64)-C(71) | 1.7(7)    |
| C(63)-C(64)-C(71)-C(72) | -1.1(7)   |
| C(64)-N(10)-C(65)-N(11) | -8.0(7)   |
| C(64)-N(10)-C(65)-C(68) | 171.7(4)  |
| C(64)-C(71)-C(72)-C(61) | -0.9(7)   |
| C(65)-N(10)-C(64)-C(63) | 162.6(5)  |
| C(65)-N(10)-C(64)-C(71) | -19.6(7)  |
| C(65)-N(11)-C(66)-N(12) | -2.4(7)   |
| C(65)-N(11)-C(66)-C(70) | 179.0(4)  |
| C(66)-N(11)-C(65)-N(10) | -178.3(4) |
| C(66)-N(11)-C(65)-C(68) | 2.0(6)    |

|                         |           |
|-------------------------|-----------|
| C(66)-N(12)-C(67)-C(68) | 2.1(6)    |
| C(66)-N(12)-C(67)-C(69) | -176.1(4) |
| C(67)-N(12)-C(66)-N(11) | 0.4(7)    |
| C(67)-N(12)-C(66)-C(70) | 178.9(4)  |
| C(69)-C(67)-C(68)-C(65) | 175.8(4)  |
| C(72)-C(61)-C(62)-C(63) | -1.6(7)   |

---

Symmetry transformations used to generate equivalent atoms:

**Table S9.** Hydrogen bonds for **3m** [ $\text{\AA}$  and  $^\circ$ ].

---

| D-H...A | d(D-H) | d(H...A) | d(D...A) | $\angle$ (DHA) |
|---------|--------|----------|----------|----------------|
|---------|--------|----------|----------|----------------|

---

## 7. Copies of the $^1\text{H}$ NMR, $^{13}\text{C}$ NMR, $^{19}\text{F}$ NMR spectra

$^1\text{H}$  NMR (400 MHz,  $\text{CDCl}_3$ ) of *N*-([1,1'-Biphenyl]-4-yl)-6-methyl-2-(trifluoromethyl)pyrimidin-4-amine (3a)

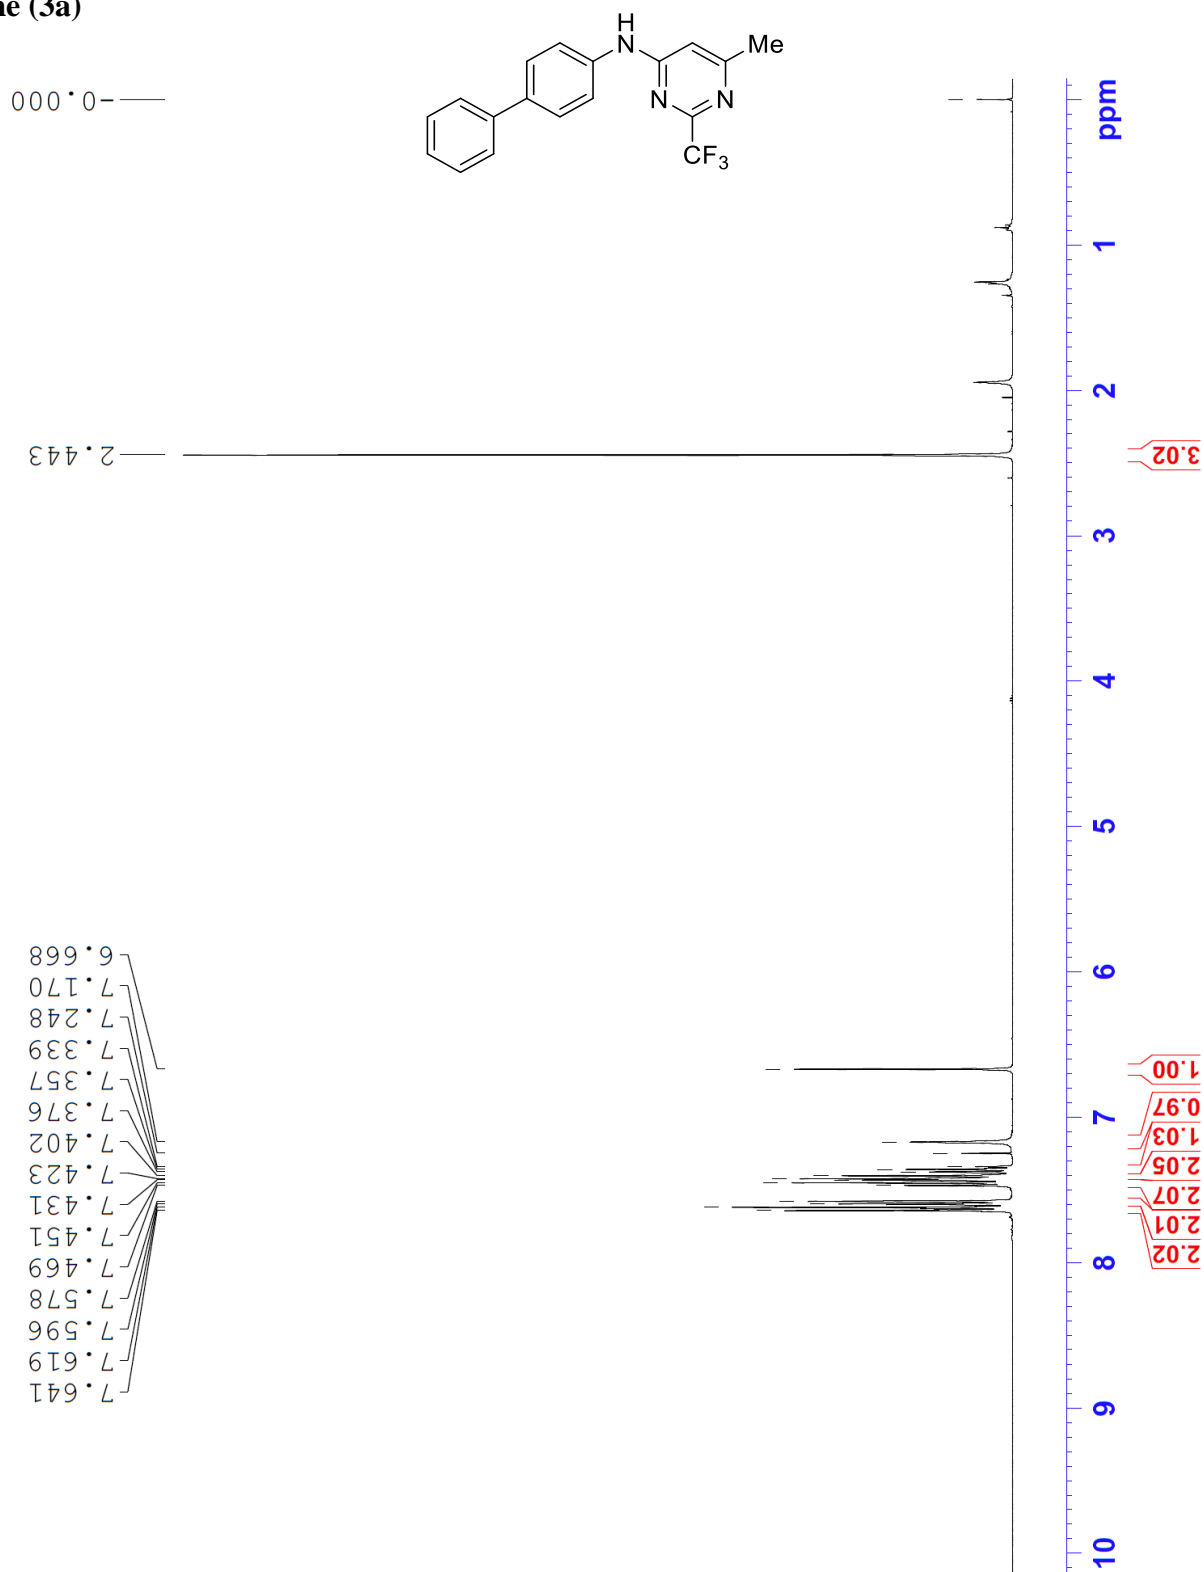

<sup>13</sup>C NMR (100.6 MHz, CDCl<sub>3</sub>) of *N*-([1,1'-Biphenyl]-4-yl)-6-methyl-2-(trifluoromethyl)pyrimidin-4-amine (3a)

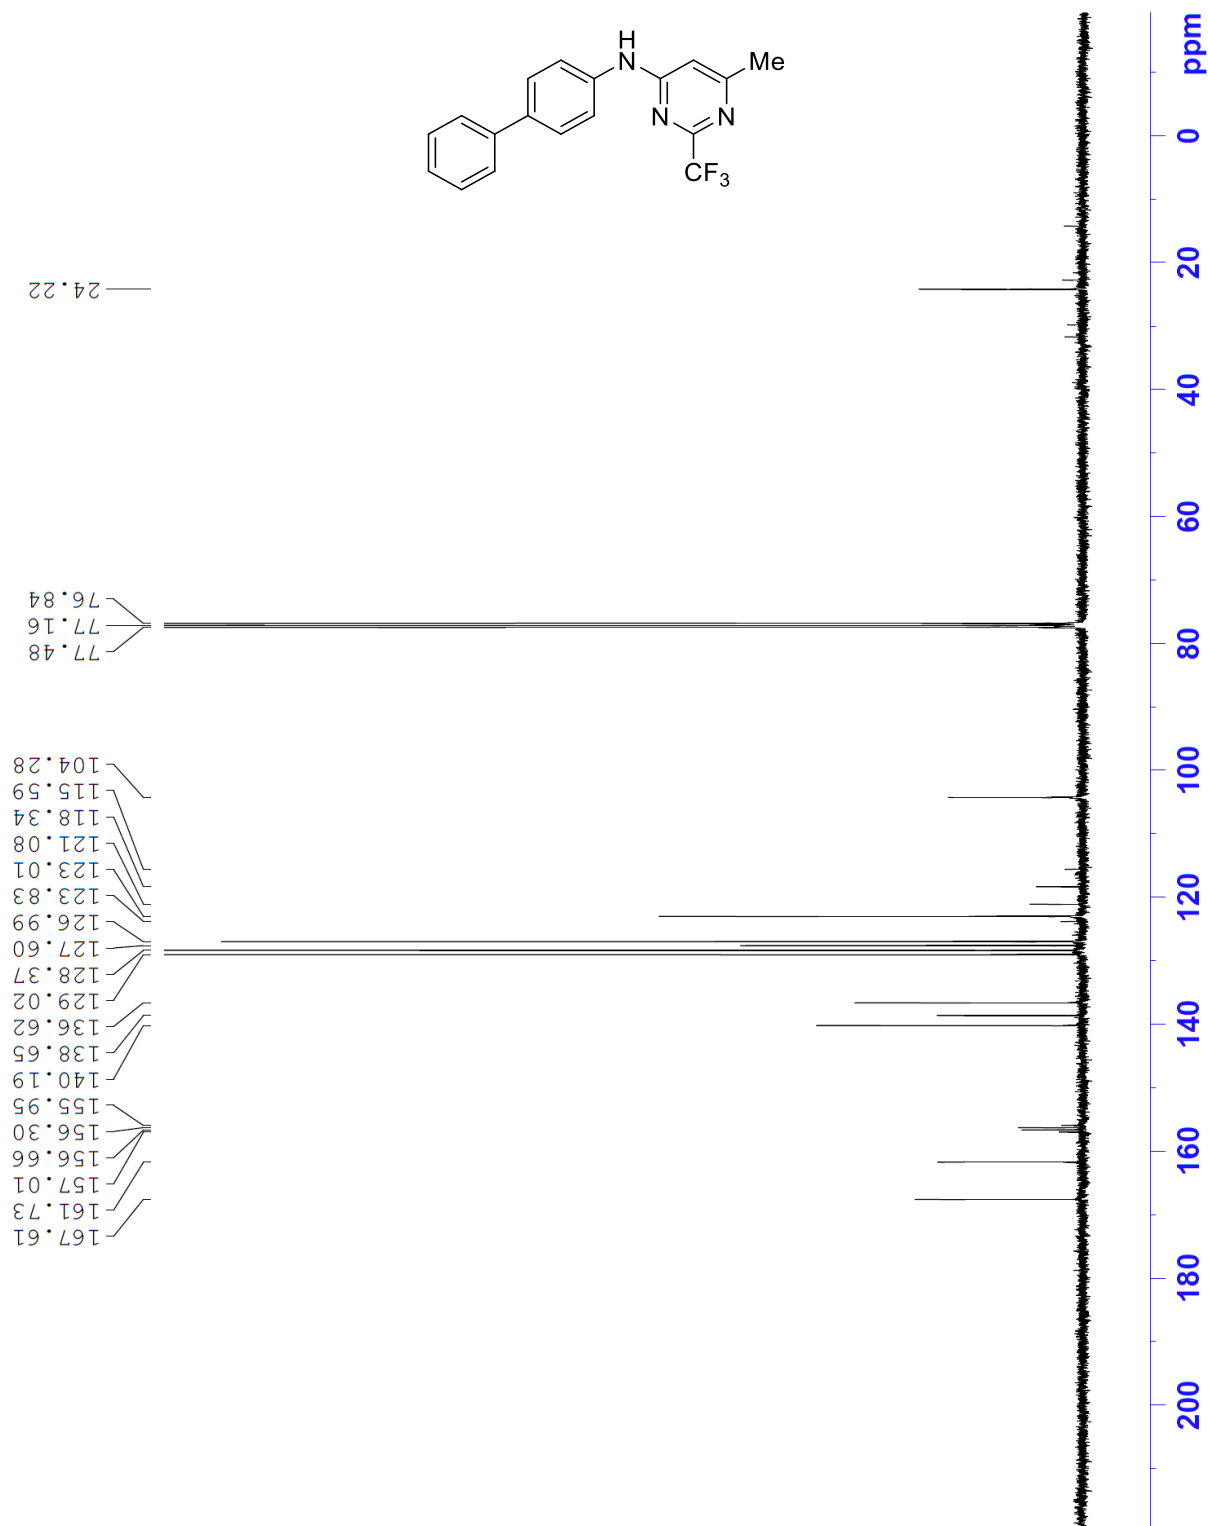

**<sup>19</sup>F NMR (376 MHz, CDCl<sub>3</sub>) of *N*-([1,1'-Biphenyl]-4-yl)-6-methyl-2-(trifluoromethyl)pyrimidin-4-amine (3a)**

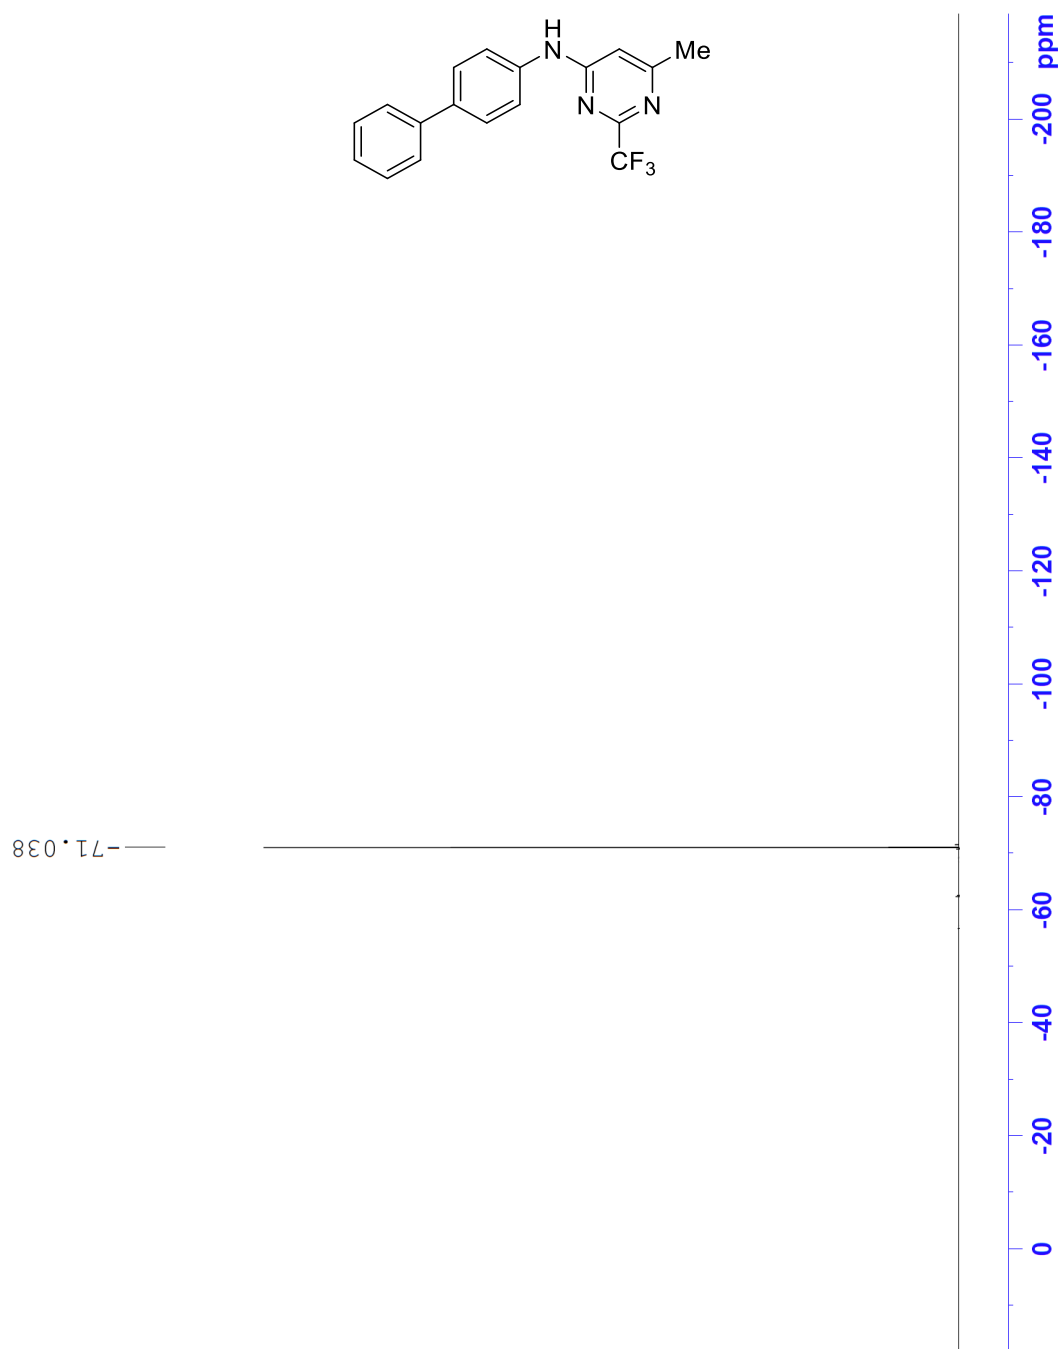

**<sup>1</sup>H-<sup>1</sup>H NOSEY (400 MHz, CDCl<sub>3</sub>) of *N*-([1,1'-Biphenyl]-4-yl)-6-methyl-2-(trifluoromethyl)pyrimidin-4-amine (3a)**

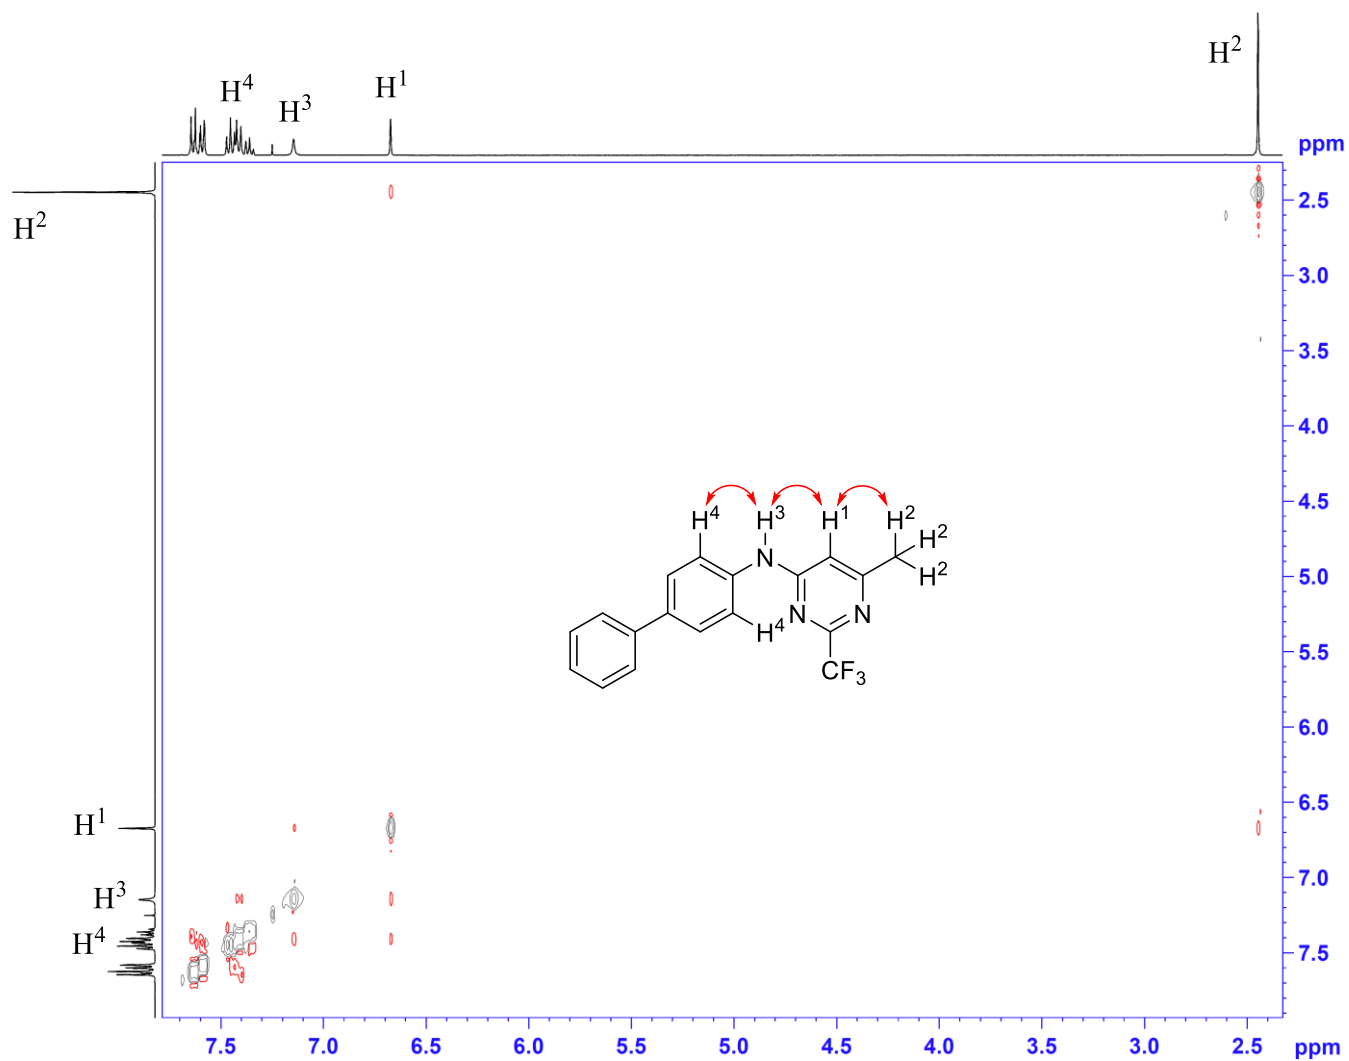

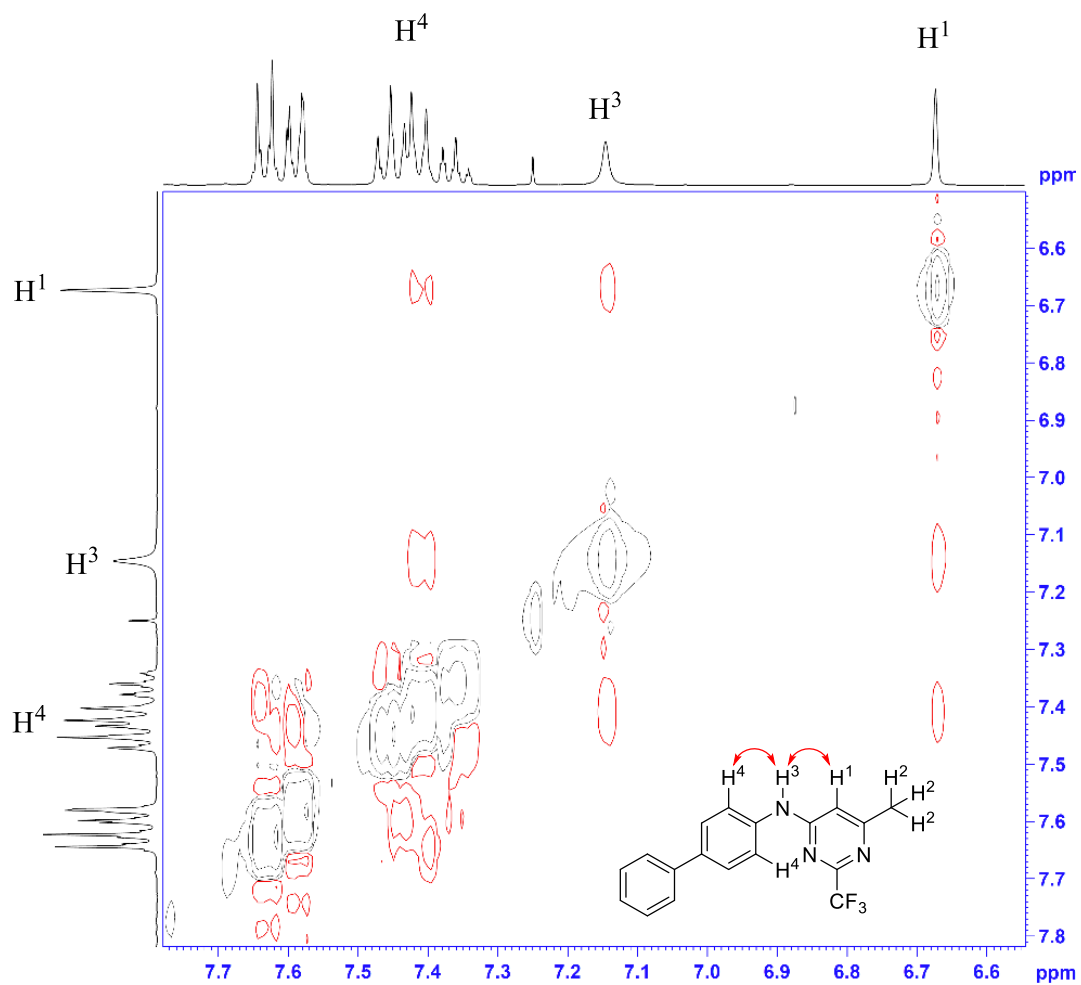



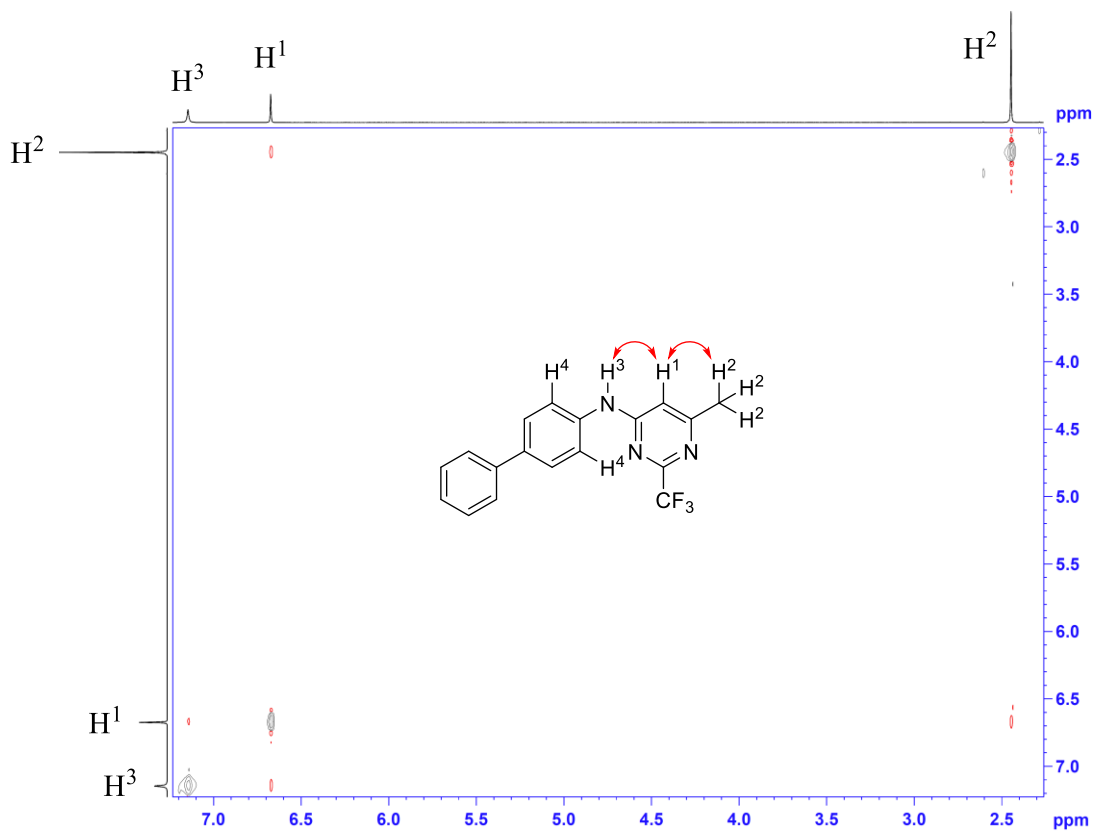

**<sup>1</sup>H NMR (400 MHz, CDCl<sub>3</sub>) of *N*-([1,1'-Biphenyl]-4-yl)-5-ethyl-6-propyl-2-(trifluoromethyl)pyrimidin-4-amine (3b)**

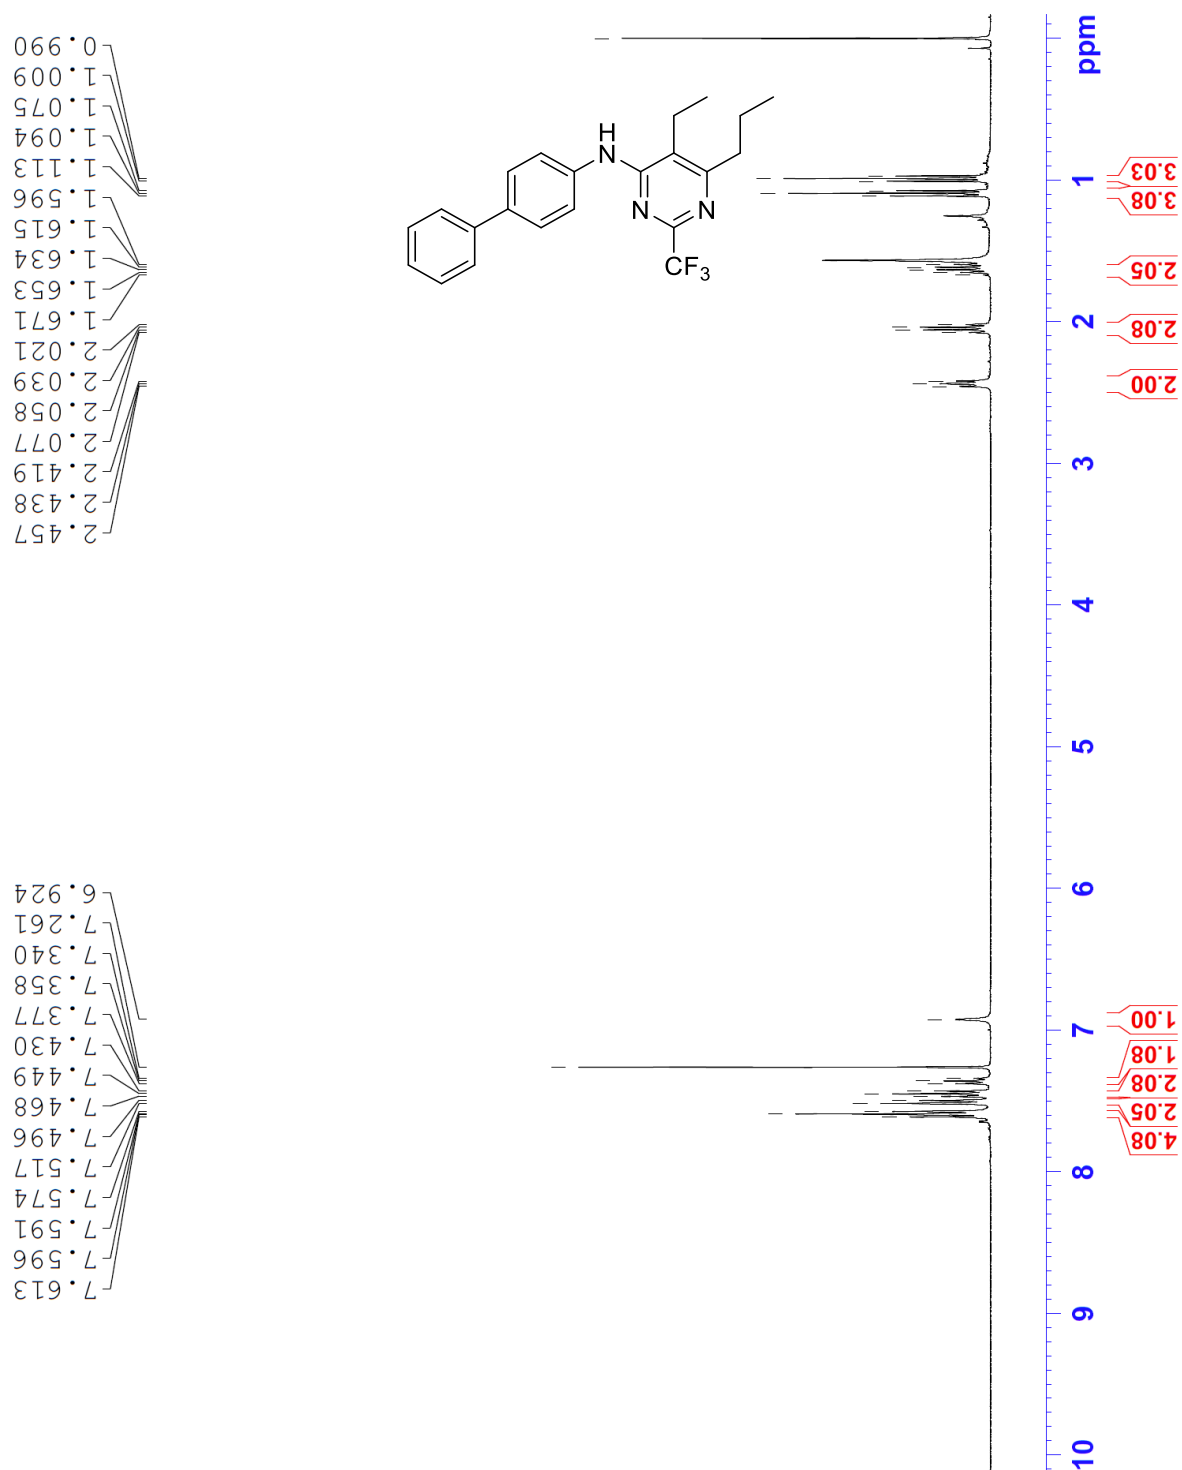

<sup>13</sup>C NMR (100.6 MHz, CDCl<sub>3</sub>) of *N*-([1,1'-Biphenyl]-4-yl)-5-ethyl-6-propyl-2-(trifluoromethyl)pyrimidin-4-amine (3b)

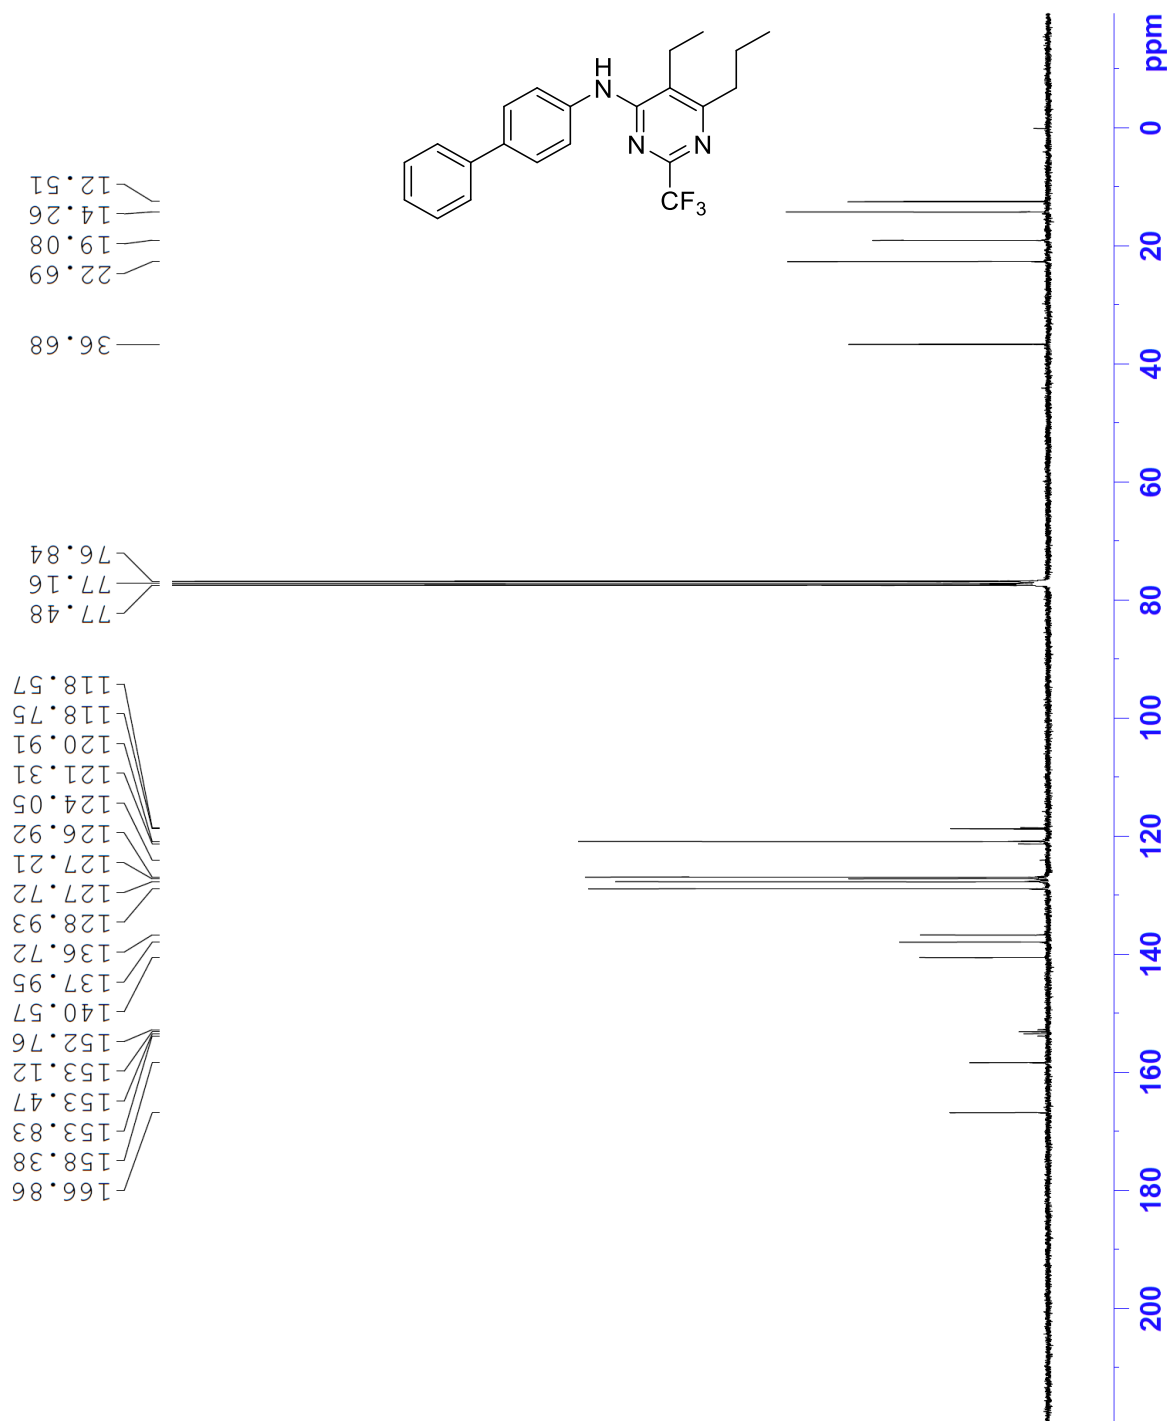

**<sup>19</sup>F NMR (565 MHz, CDCl<sub>3</sub>) of *N*-([1,1'-Biphenyl]-4-yl)-5-ethyl-6-propyl-2-(trifluoromethyl)pyrimidin-4-amine (3b)**

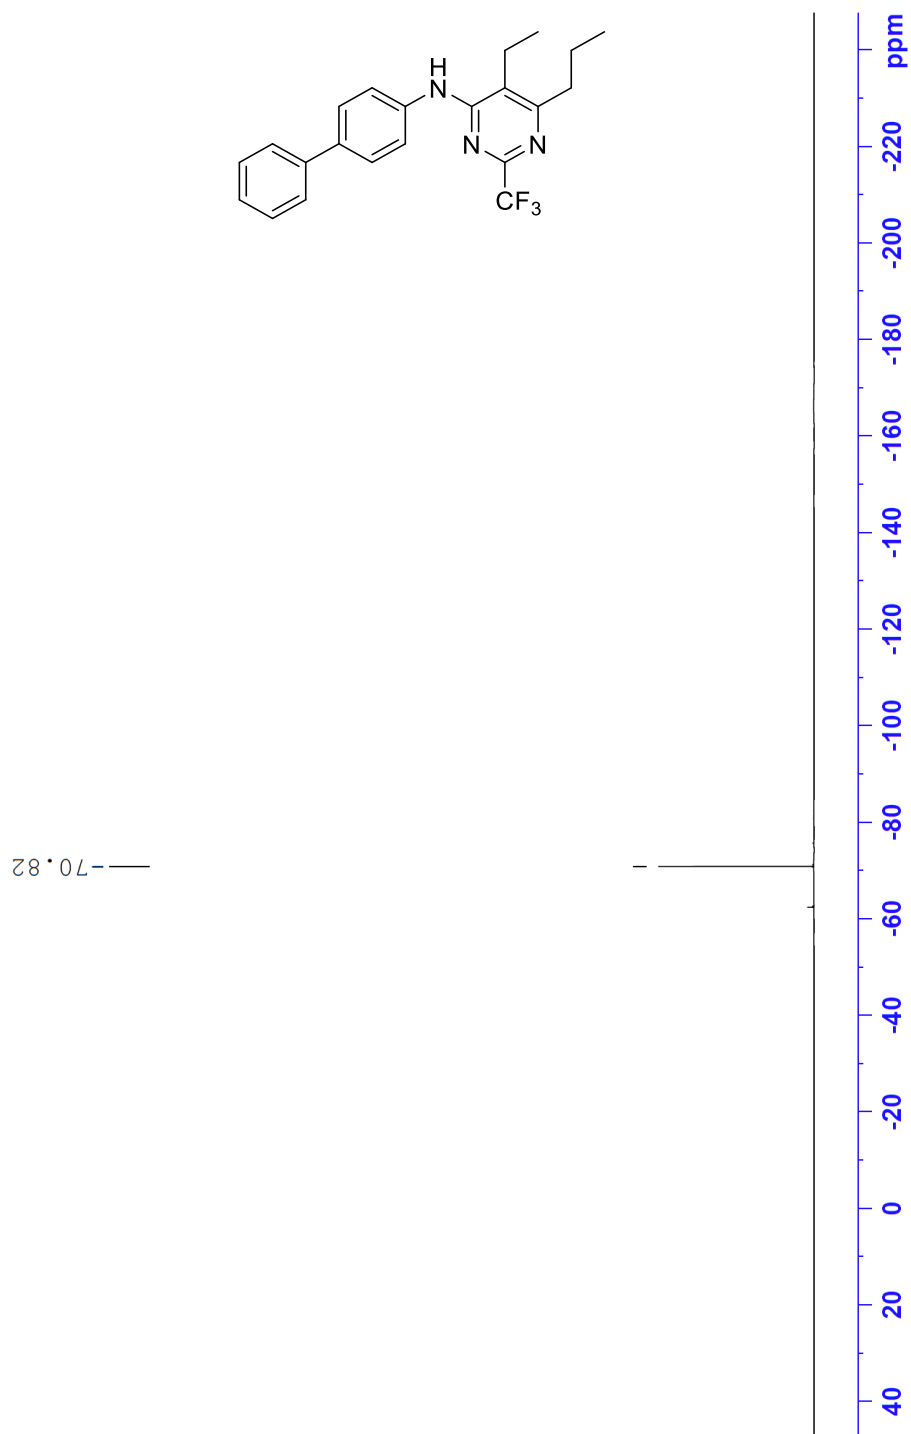

**<sup>1</sup>H NMR (400 MHz, CDCl<sub>3</sub>) of *N*-([1,1'-Biphenyl]-4-yl)-5-butyl-6-pentyl-2-(trifluoromethyl)pyrimidin-4-amine (3c)**

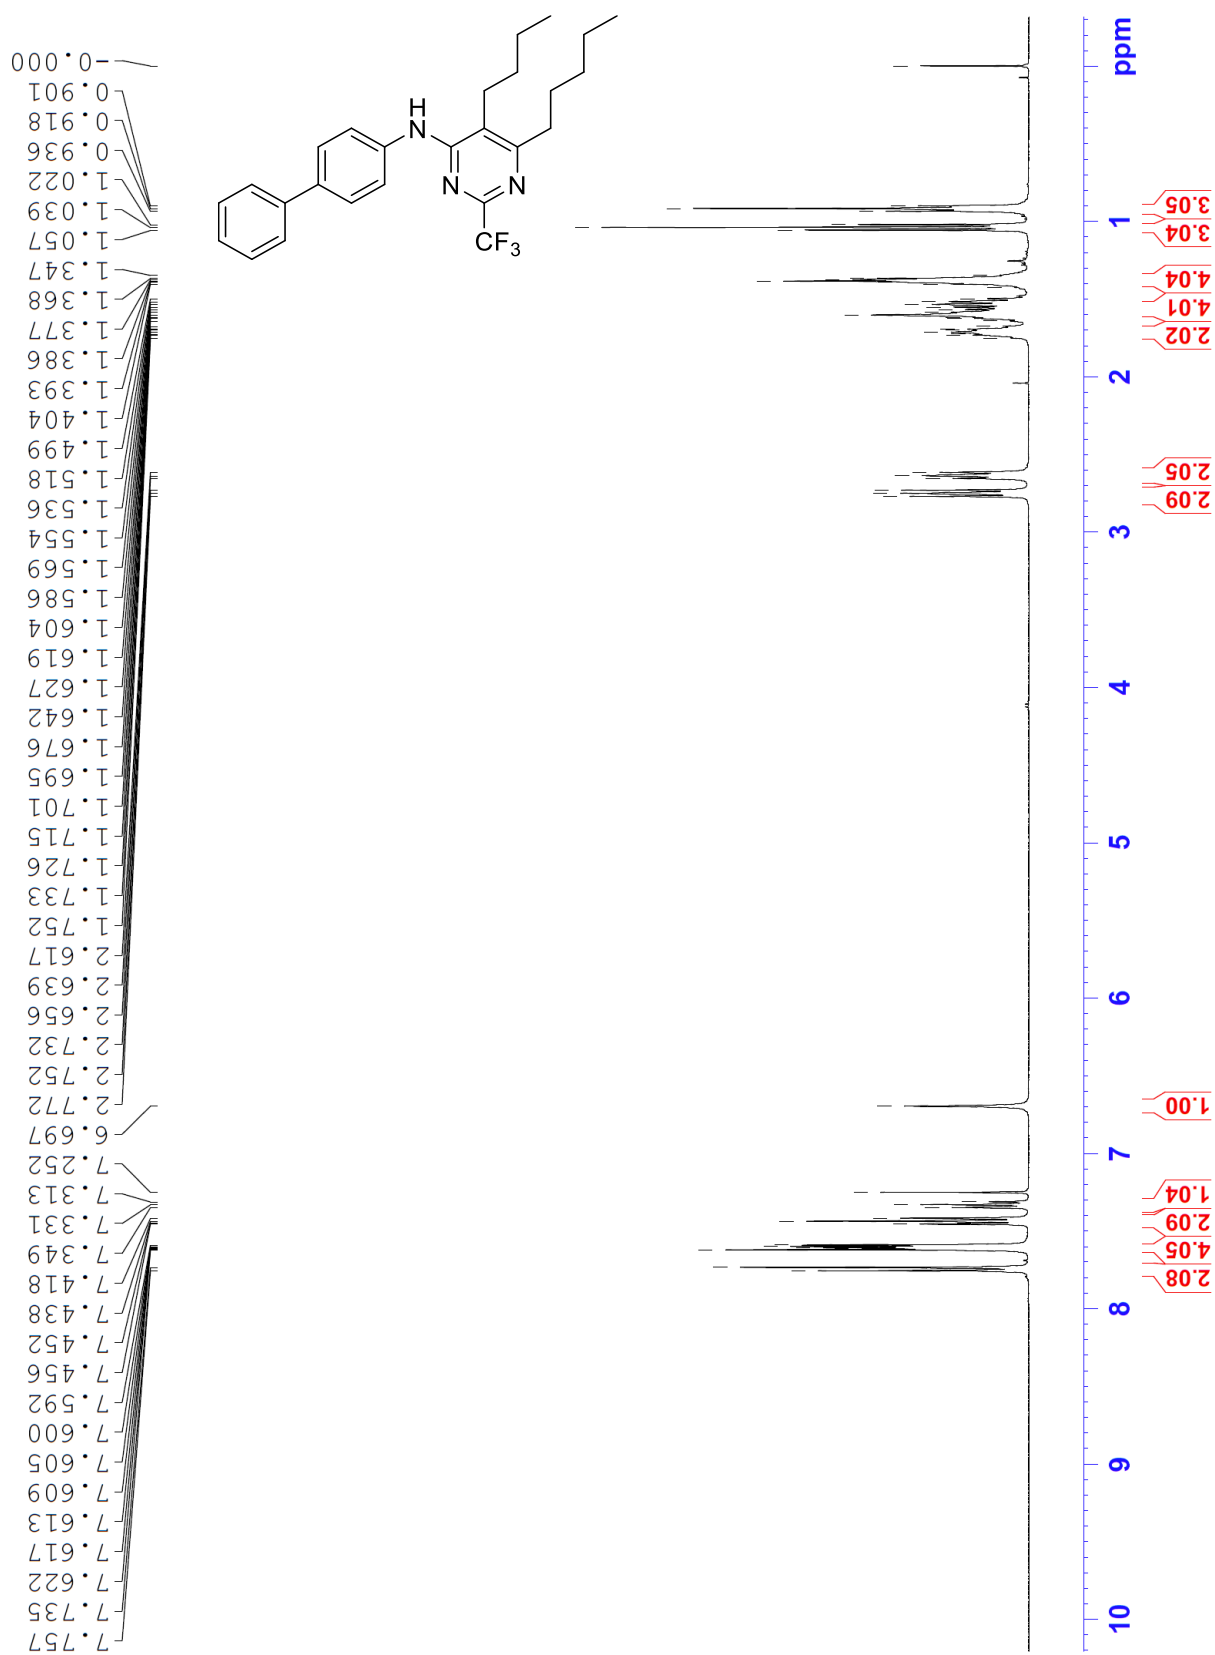

**<sup>13</sup>C NMR (100.6 MHz, CDCl<sub>3</sub>) of *N*-([1,1'-Biphenyl]-4-yl)-5-butyl-6-pentyl-2-(trifluoromethyl)pyrimidin-4-amine (3c)**

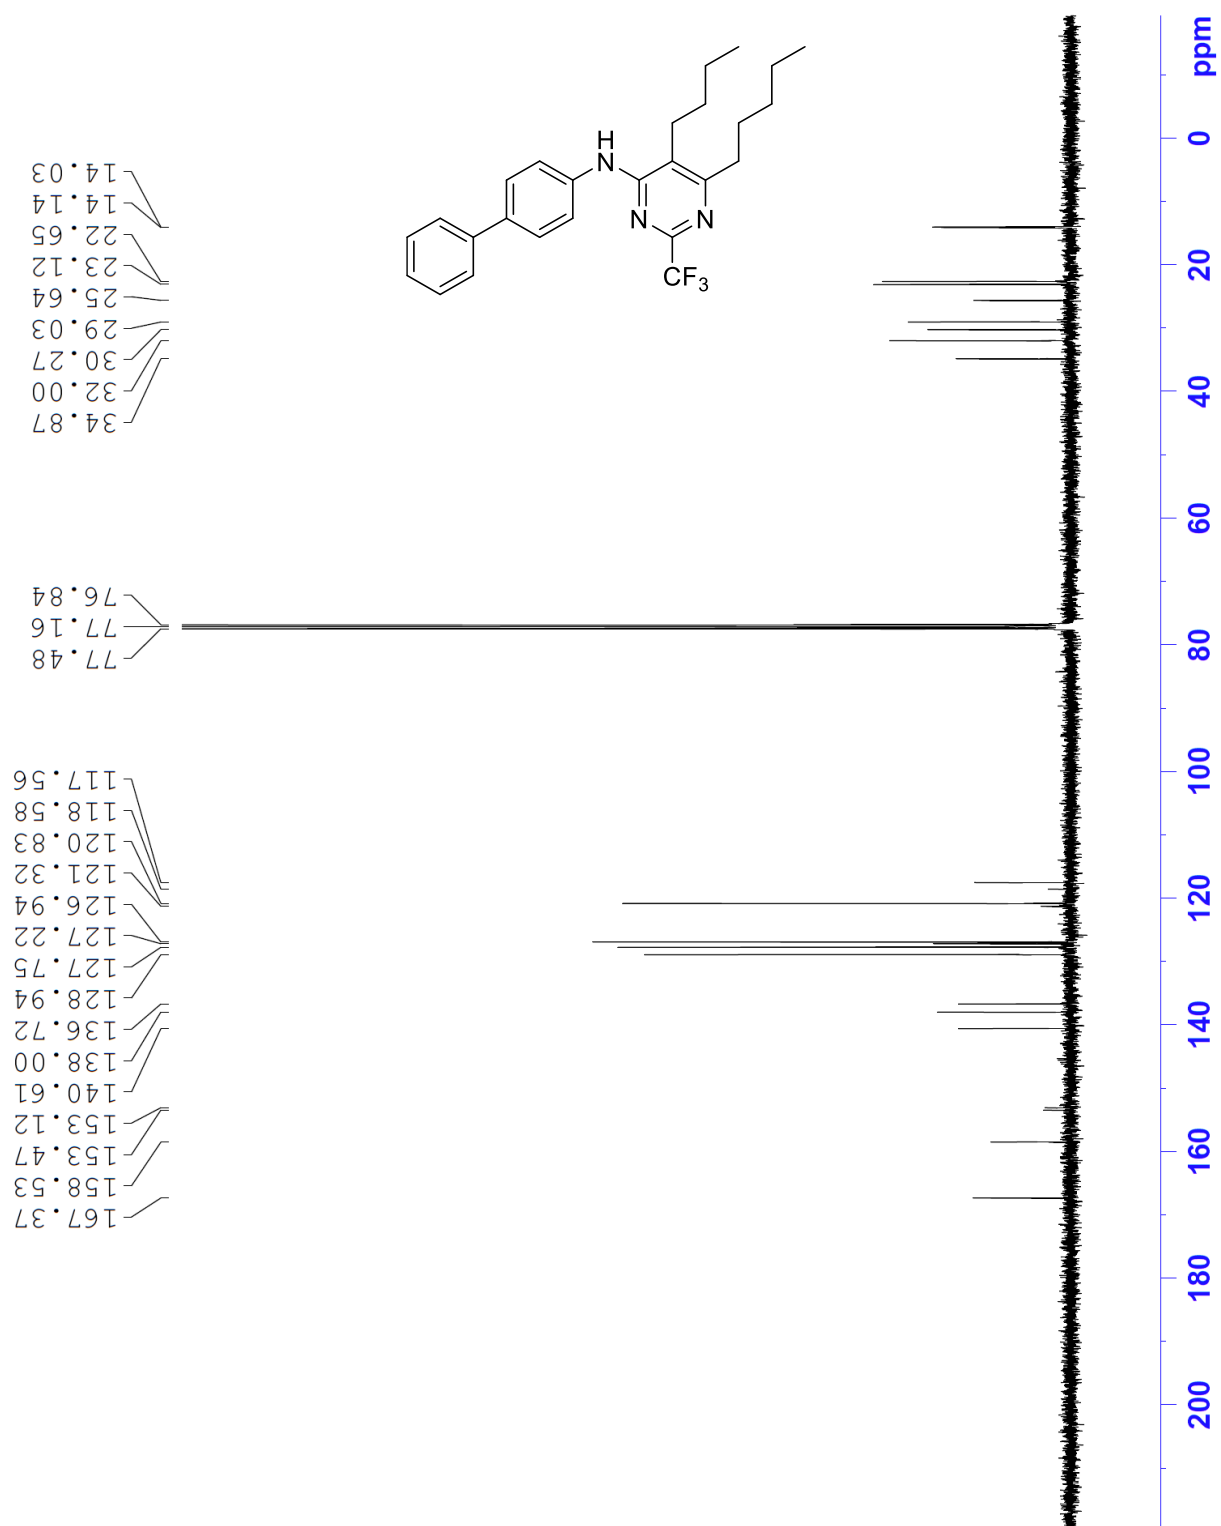

**<sup>19</sup>F NMR (376 MHz, CDCl<sub>3</sub>) of *N*-([1,1'-Biphenyl]-4-yl)-5-butyl-6-pentyl-2-(trifluoromethyl)pyrimidin-4-amine (3c)**

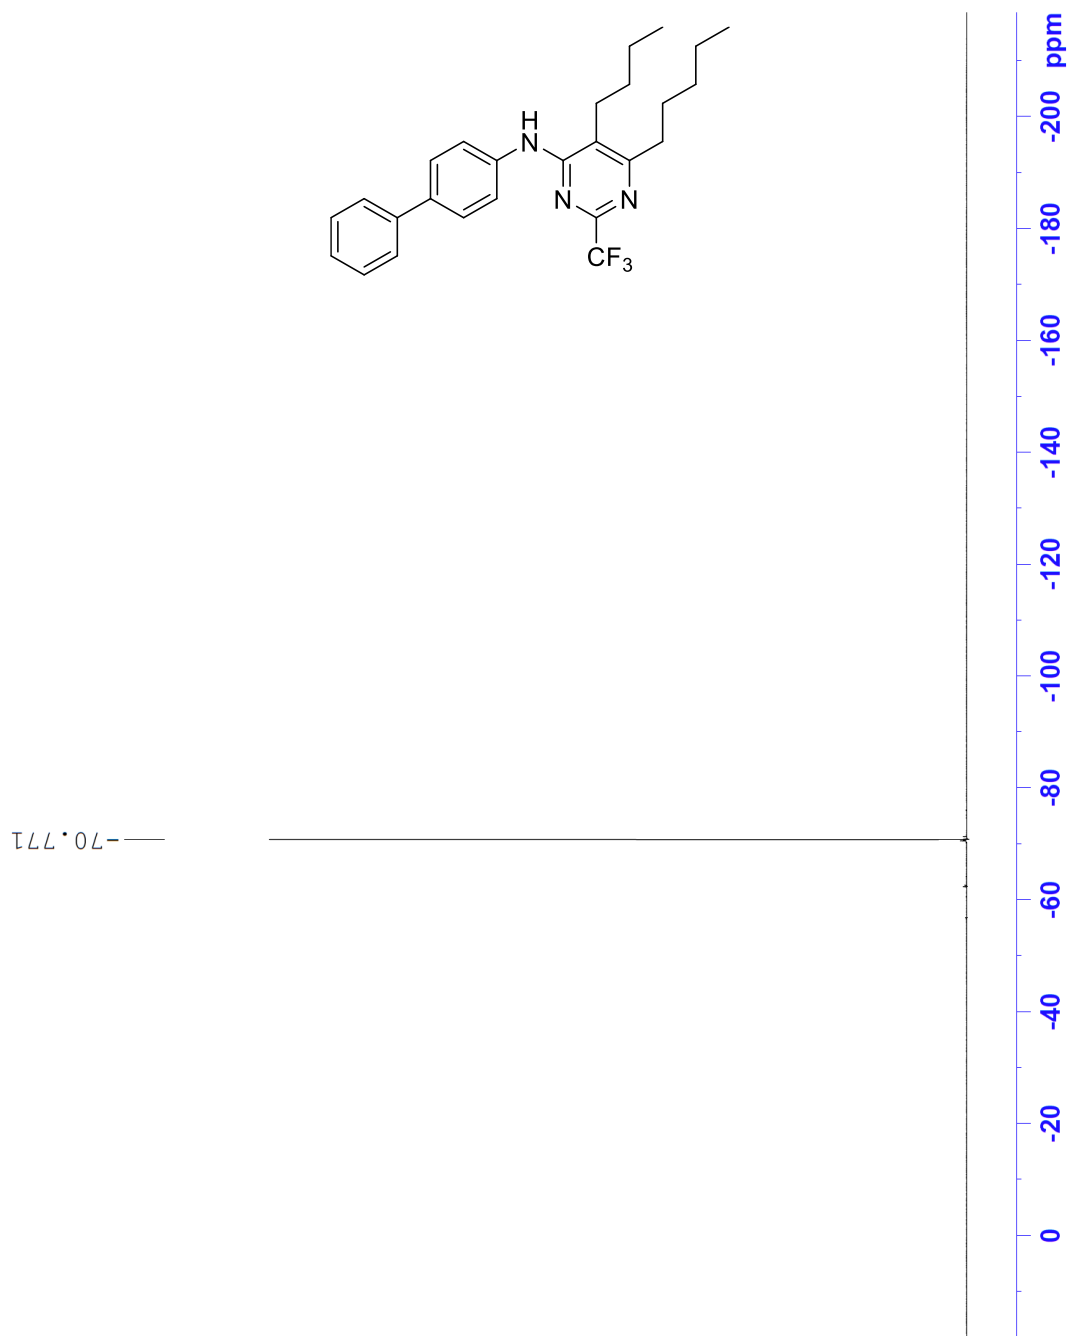

**<sup>1</sup>H NMR (400 MHz, CDCl<sub>3</sub>) of *N*-([1,1'-Biphenyl]-4-yl)-5-methoxy-6-(methoxymethyl)-2-(trifluoromethyl)pyrimidin-4-amine (3d)**

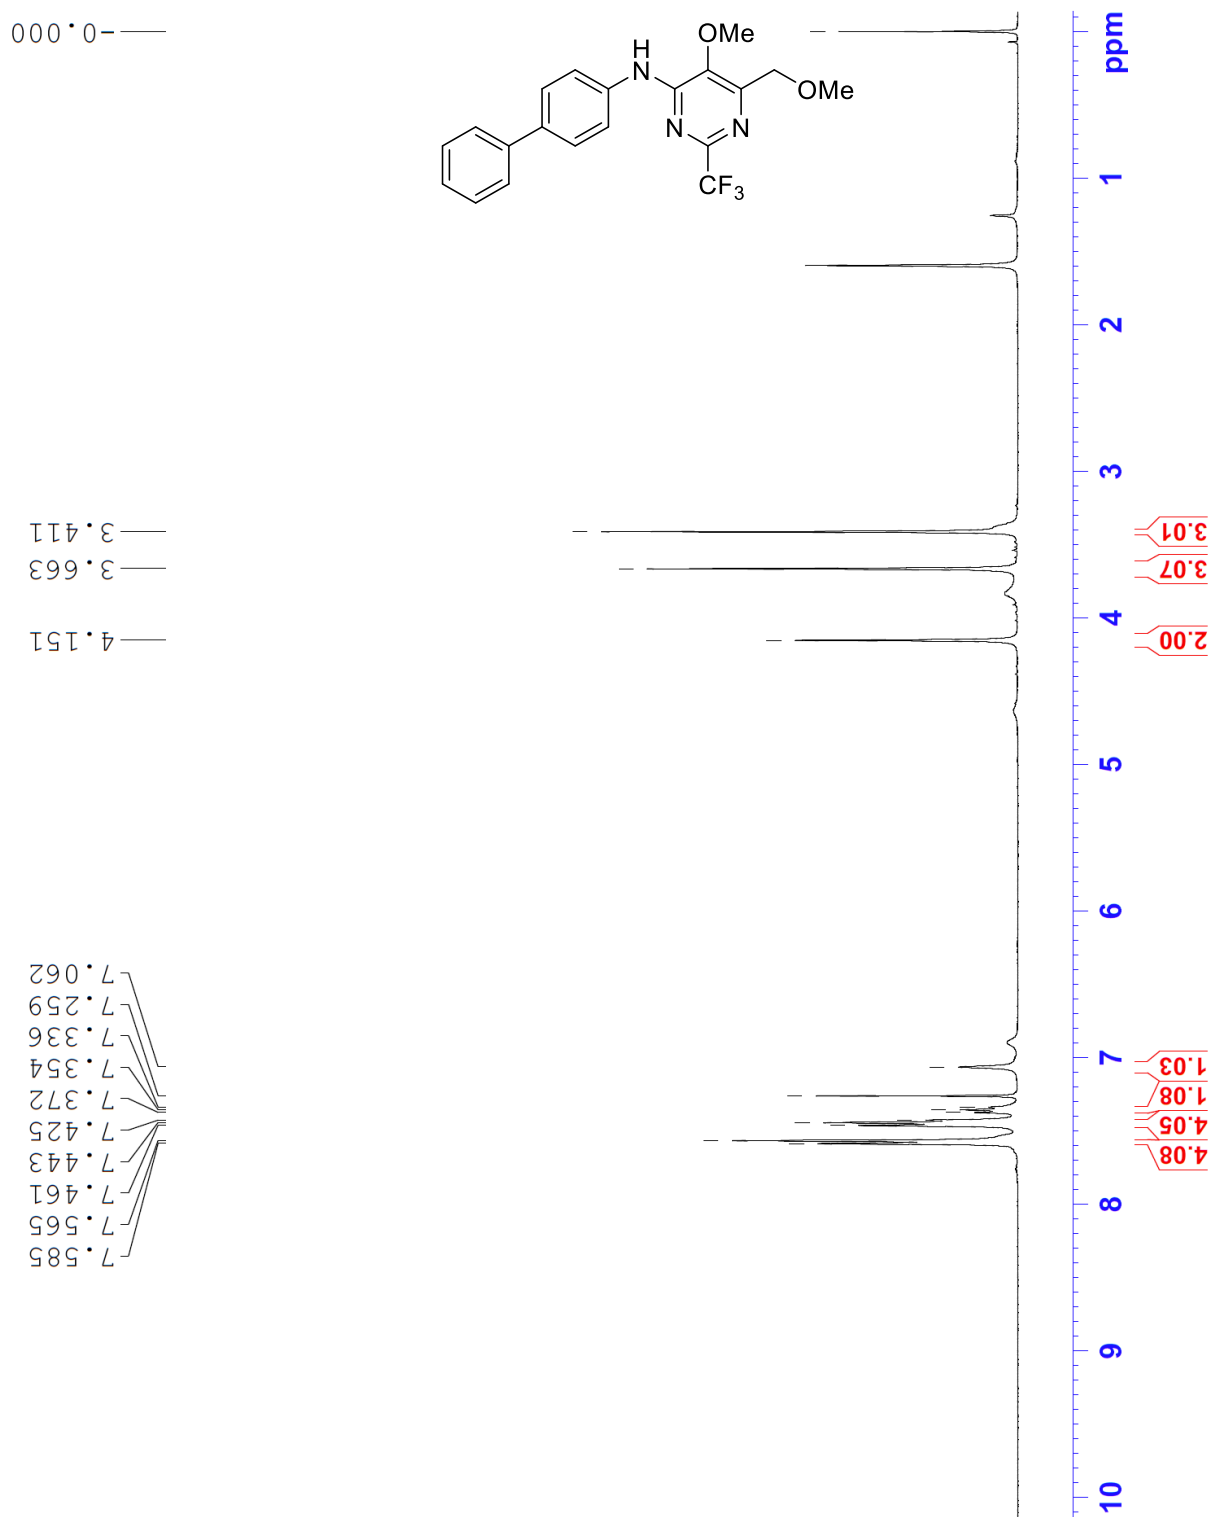



**<sup>13</sup>C NMR (100.6 MHz, CDCl<sub>3</sub>) of *N*-([1,1'-Biphenyl]-4-yl)-5-methoxy-6-(methoxymethyl)-2-(trifluoromethyl)pyrimidin-4-amine (3d)**

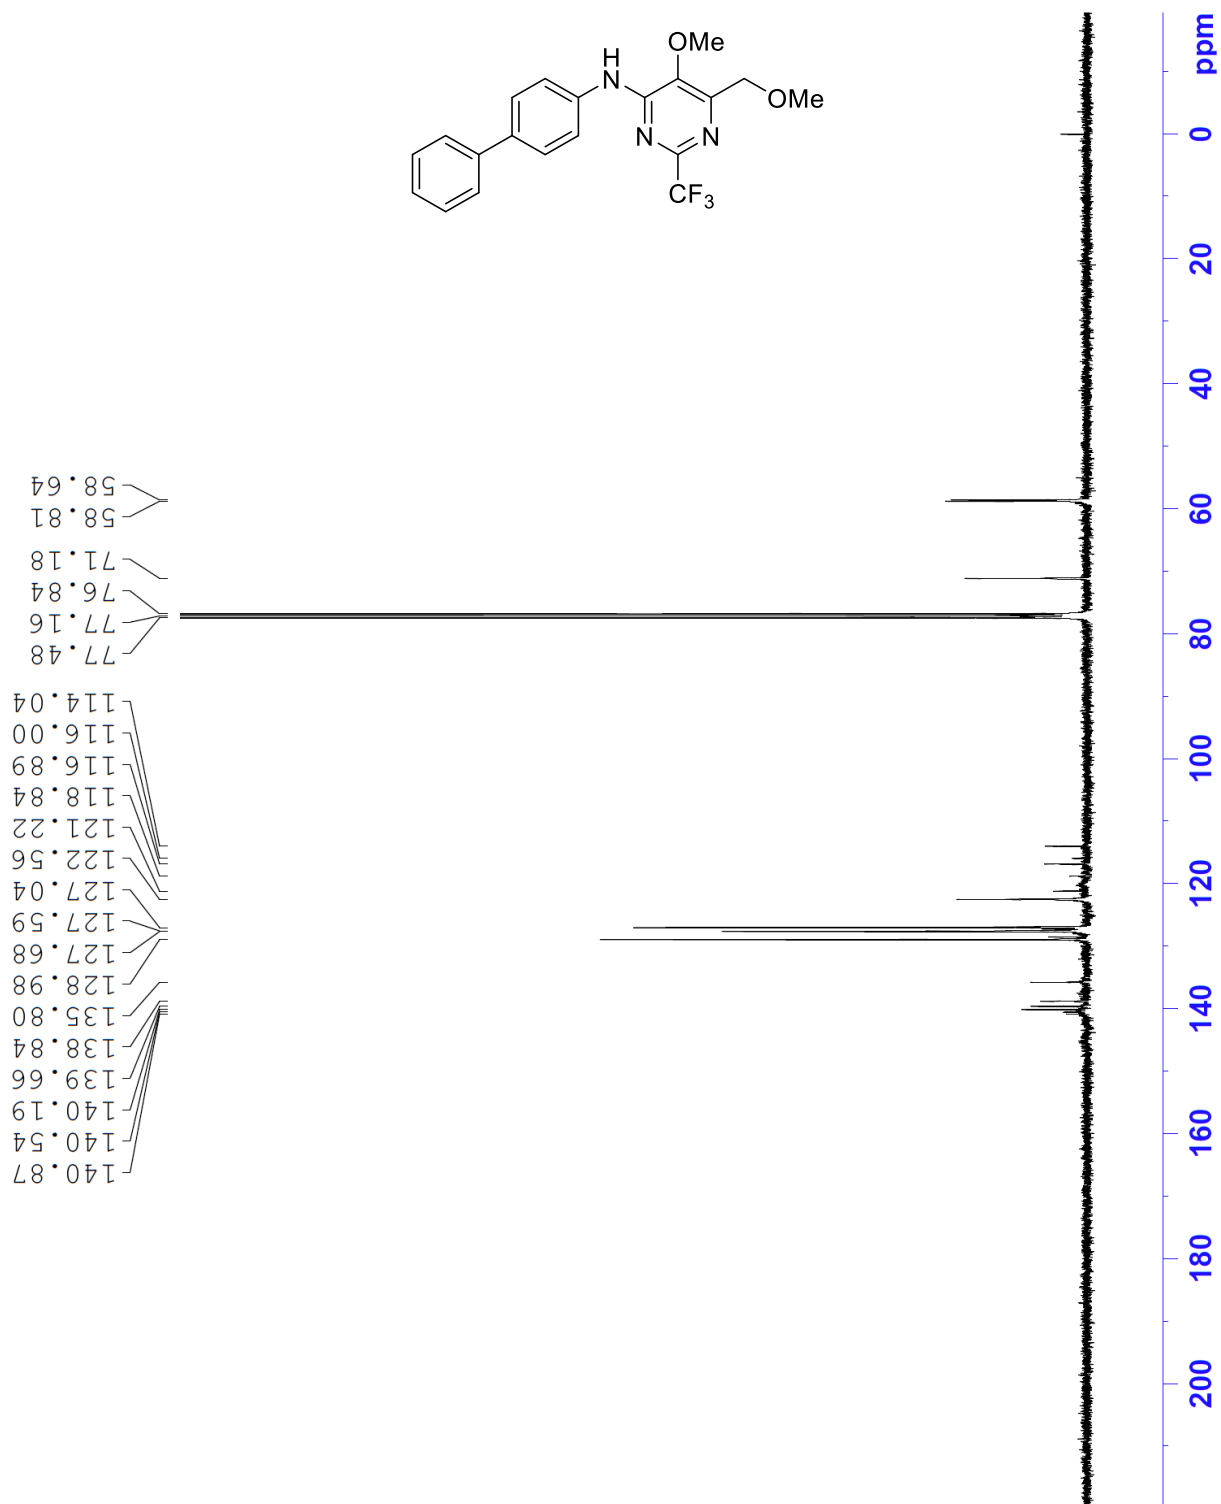

**<sup>19</sup>F NMR (376 MHz, CDCl<sub>3</sub>) of *N*-([1,1'-Biphenyl]-4-yl)-5-methoxy-6-(methoxymethyl)-2-(trifluoromethyl)pyrimidin-4-amine (3d)**

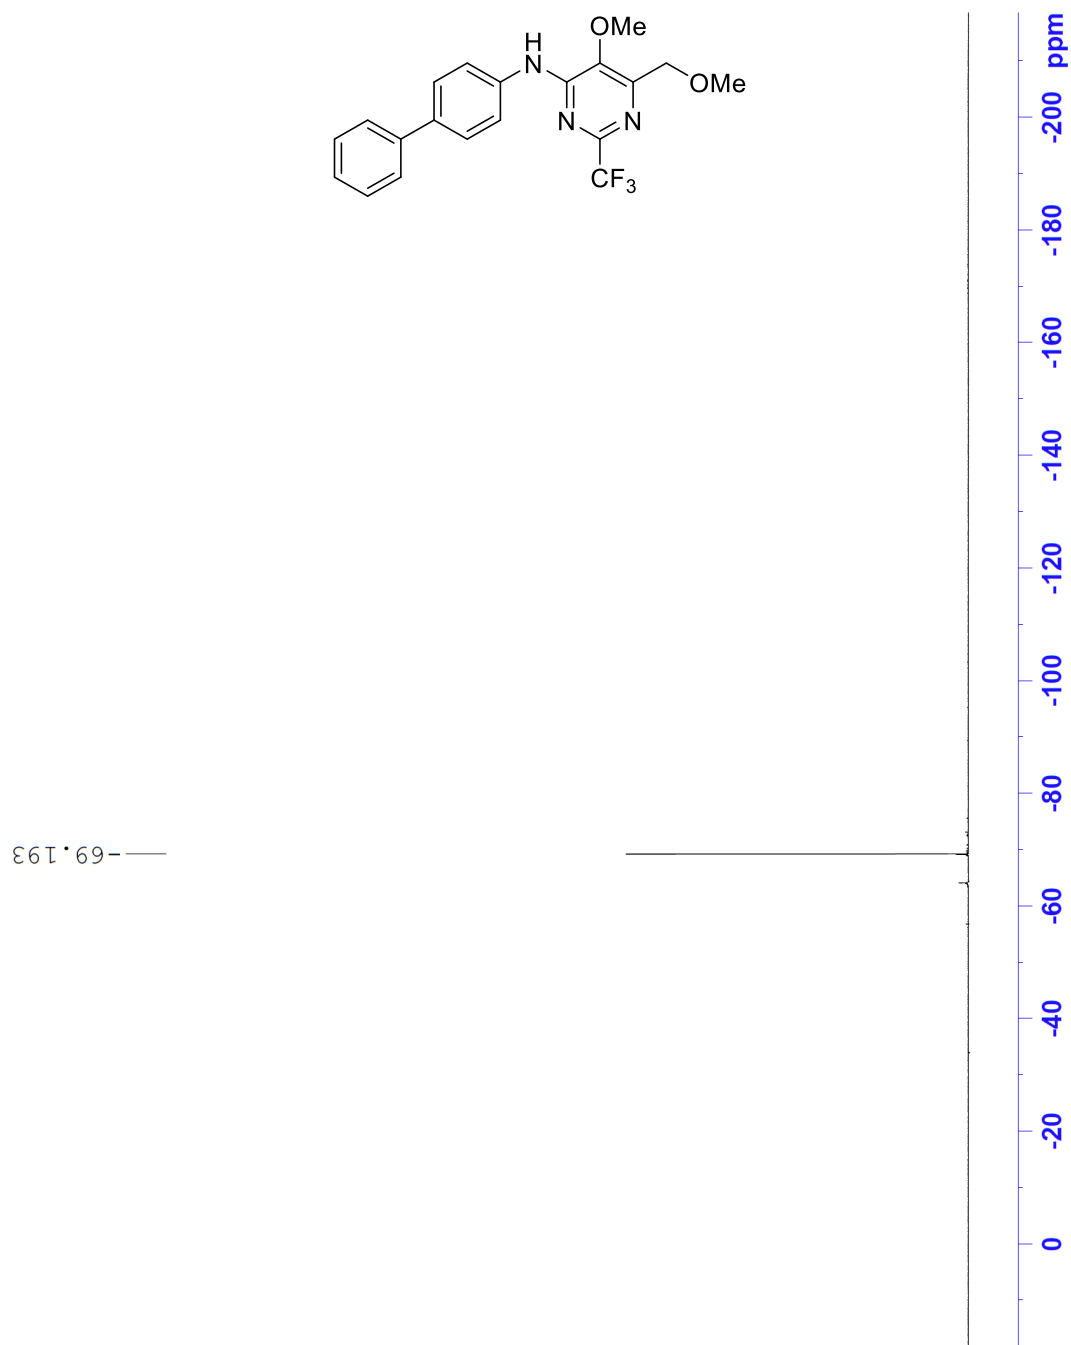

**<sup>1</sup>H NMR (400 MHz, CDCl<sub>3</sub>) of *N*-([1,1'-Biphenyl]-4-yl)-5-(methylthio)-6-((methylthio)methyl)-2-(trifluoromethyl)pyrimidin-4-amine (3e)**

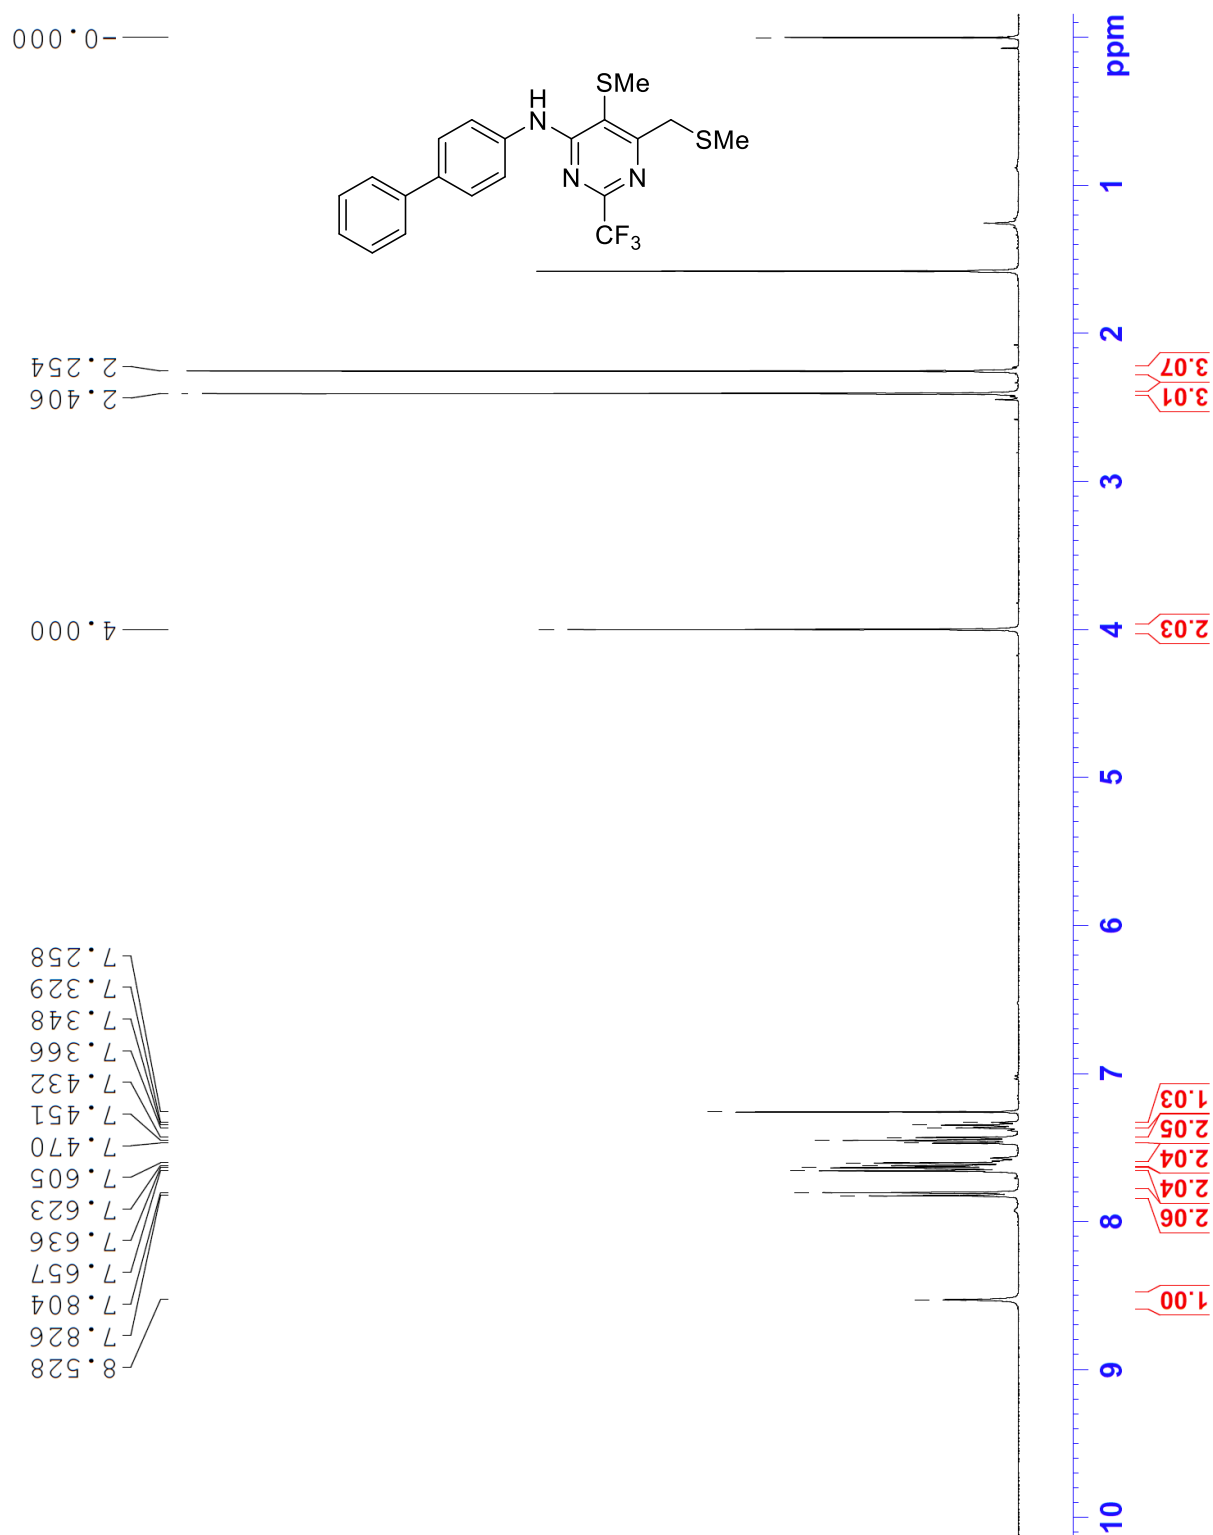

**<sup>13</sup>C NMR (100.6 MHz, CDCl<sub>3</sub>) of *N*-([1,1'-Biphenyl]-4-yl)-5-(methylthio)-6-((methylthio)methyl)-2-(trifluoromethyl)pyrimidin-4-amine (3e)**

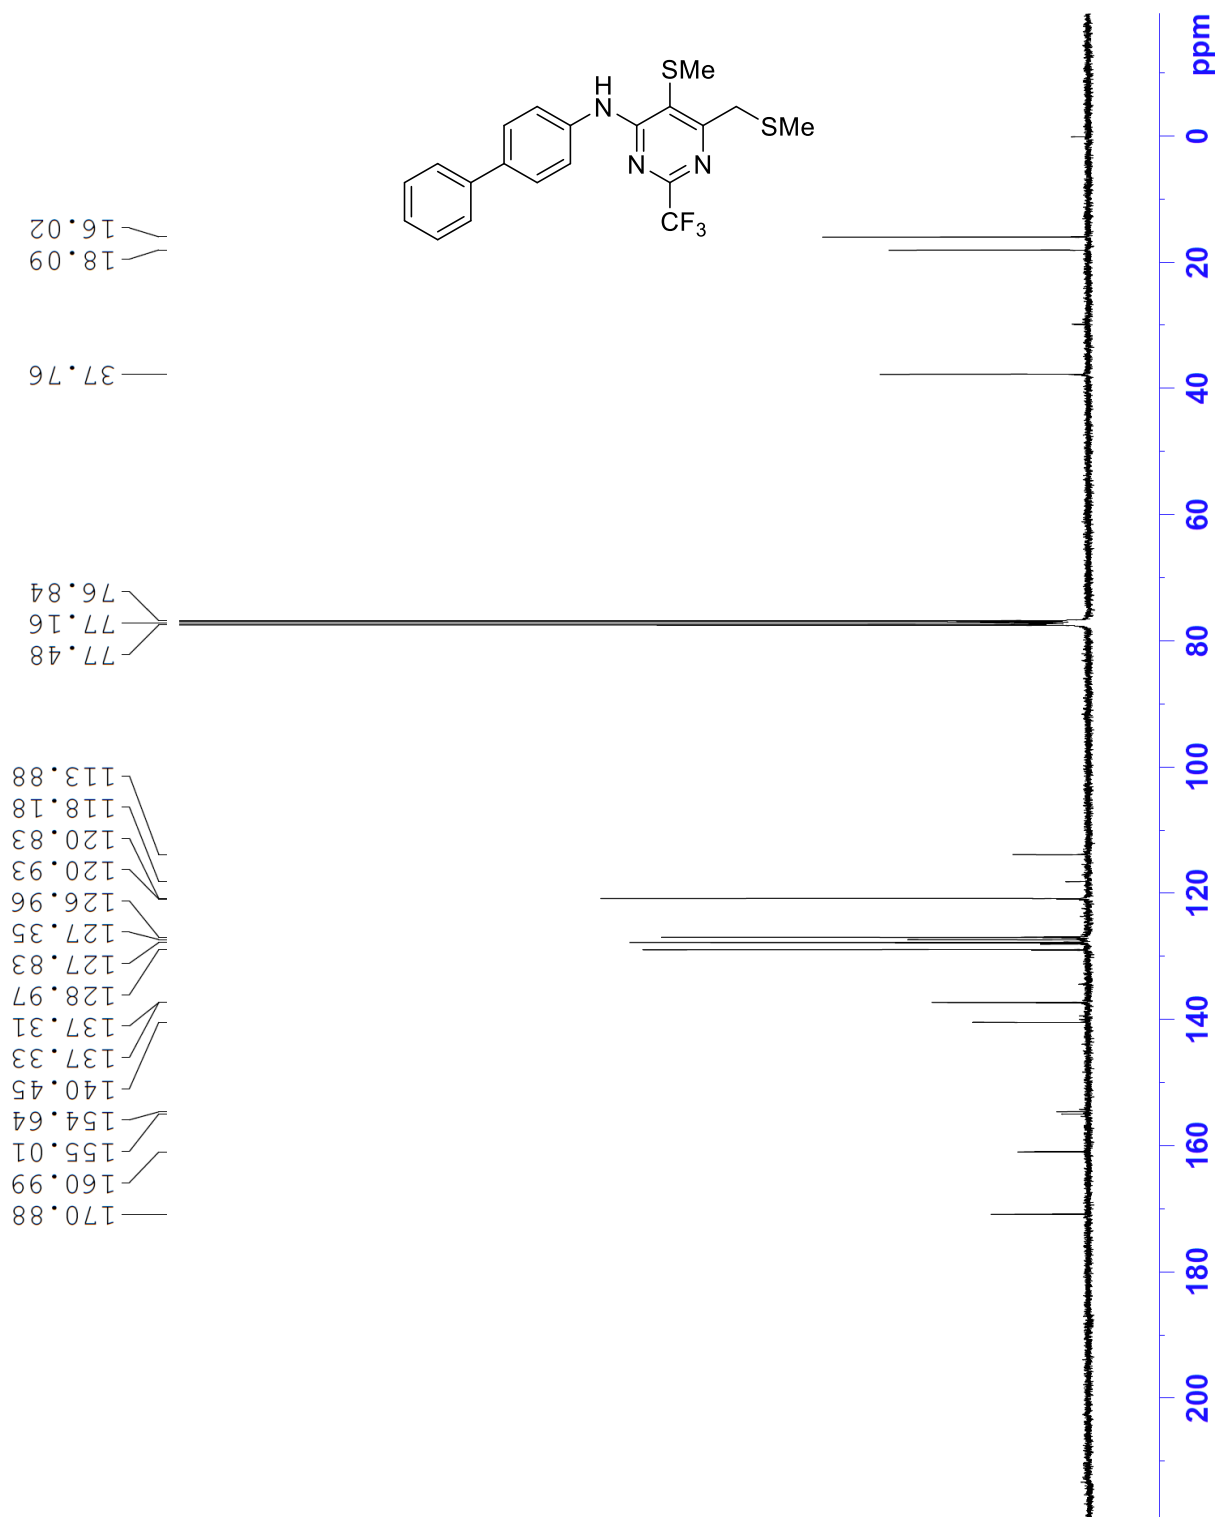

**<sup>19</sup>F NMR (376 MHz, CDCl<sub>3</sub>) of *N*-([1,1'-Biphenyl]-4-yl)-5-(methylthio)-6-((methylthio)methyl)-2-(trifluoromethyl)pyrimidin-4-amine (3e)**

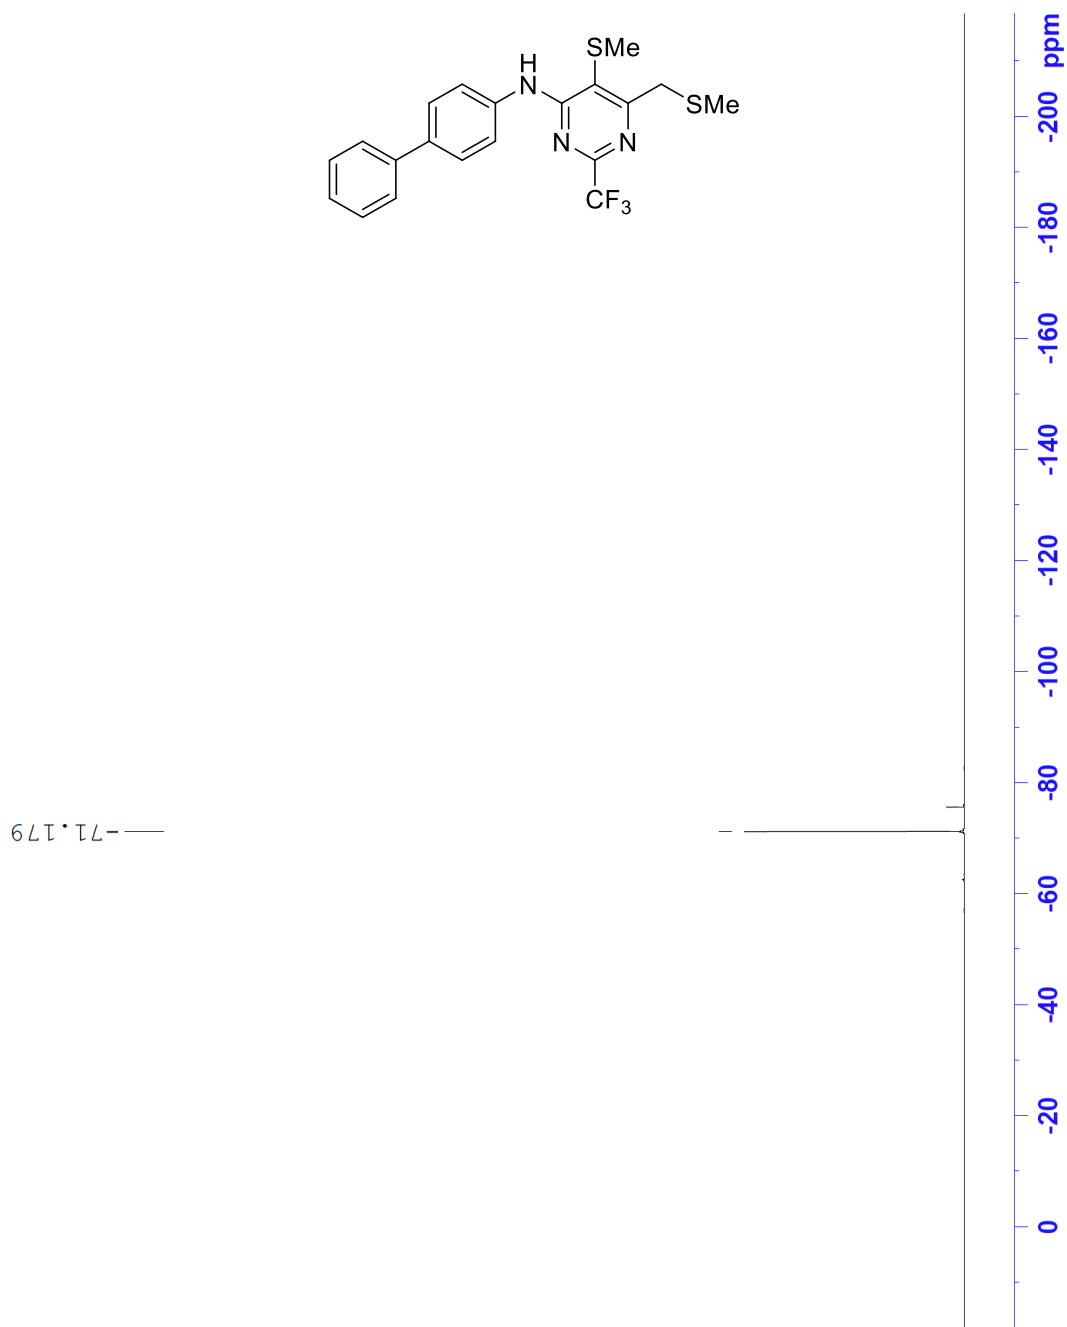

**<sup>1</sup>H NMR (400 MHz, CDCl<sub>3</sub>) of *N*-([1,1'-Biphenyl]-4-yl)-2-(trifluoromethyl)-6,7-dihydro-5*H*-cyclopenta[*d*]pyrimidin-4-amine (3f)**

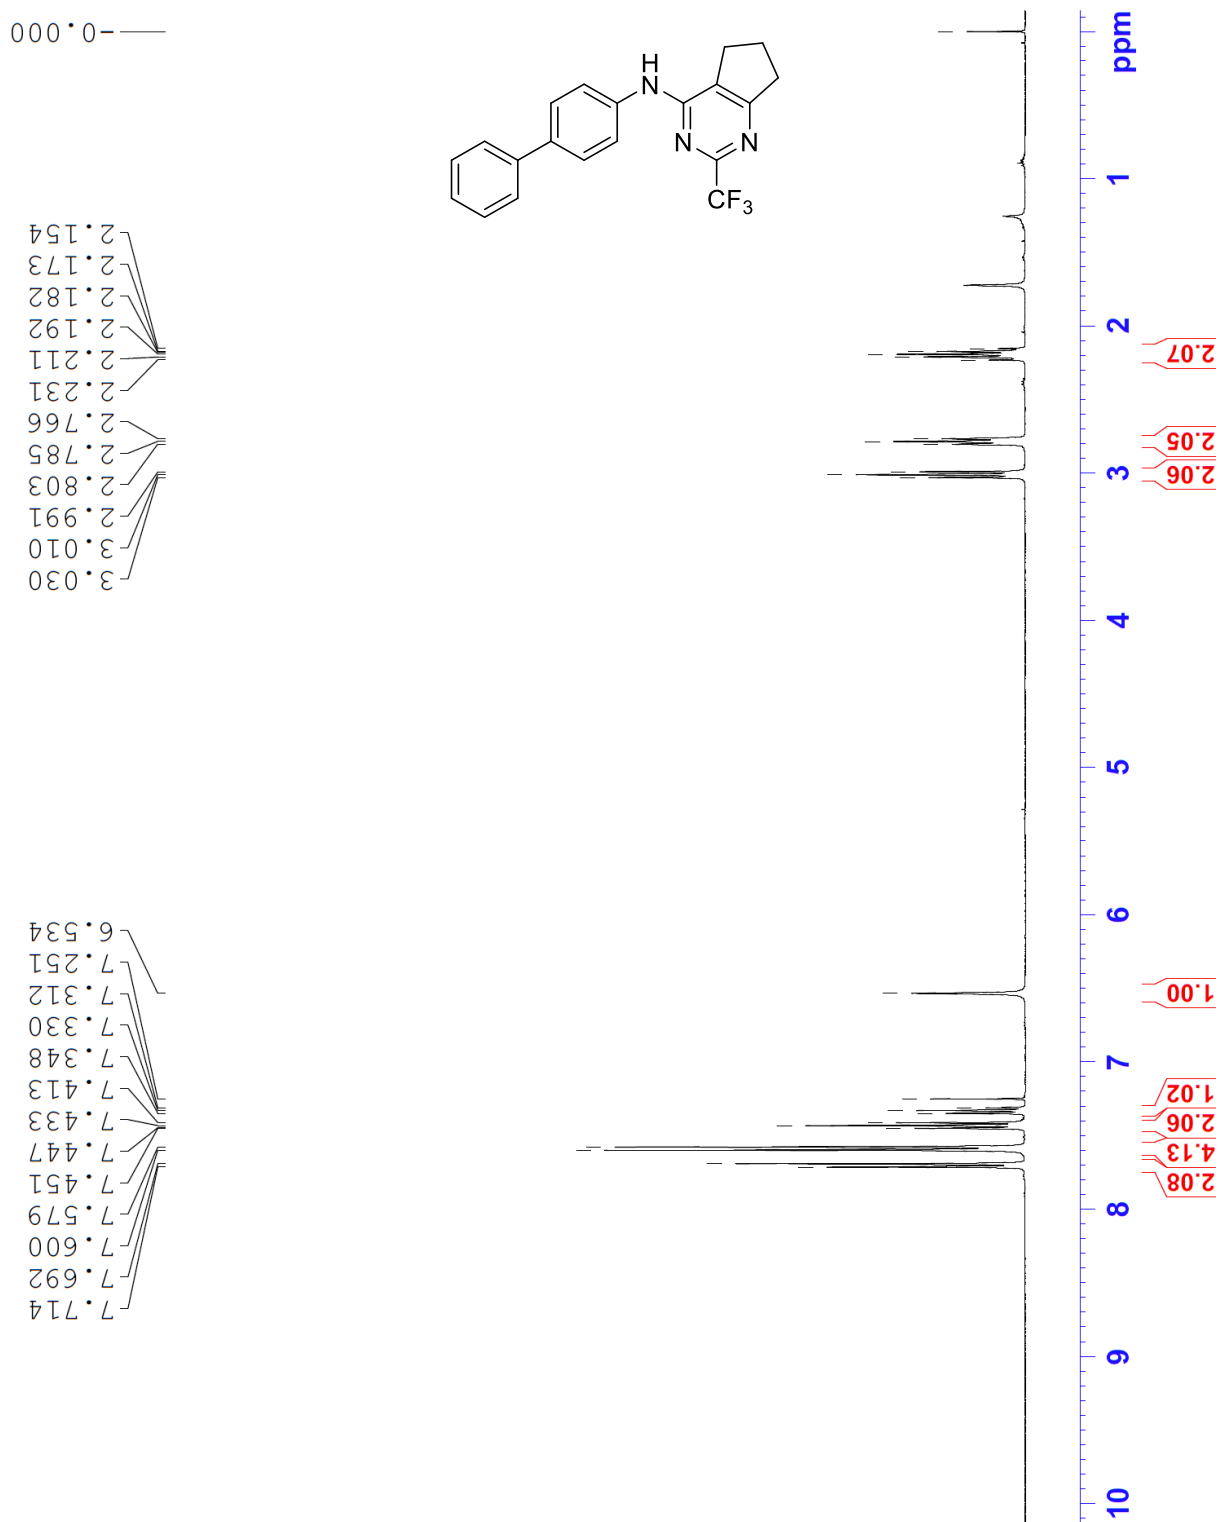

**<sup>13</sup>C NMR (100.6 MHz, CDCl<sub>3</sub>) of *N*-([1,1'-Biphenyl]-4-yl)-2-(trifluoromethyl)-6,7-dihydro-5*H*-cyclopenta[*d*]pyrimidin-4-amine (3f)**

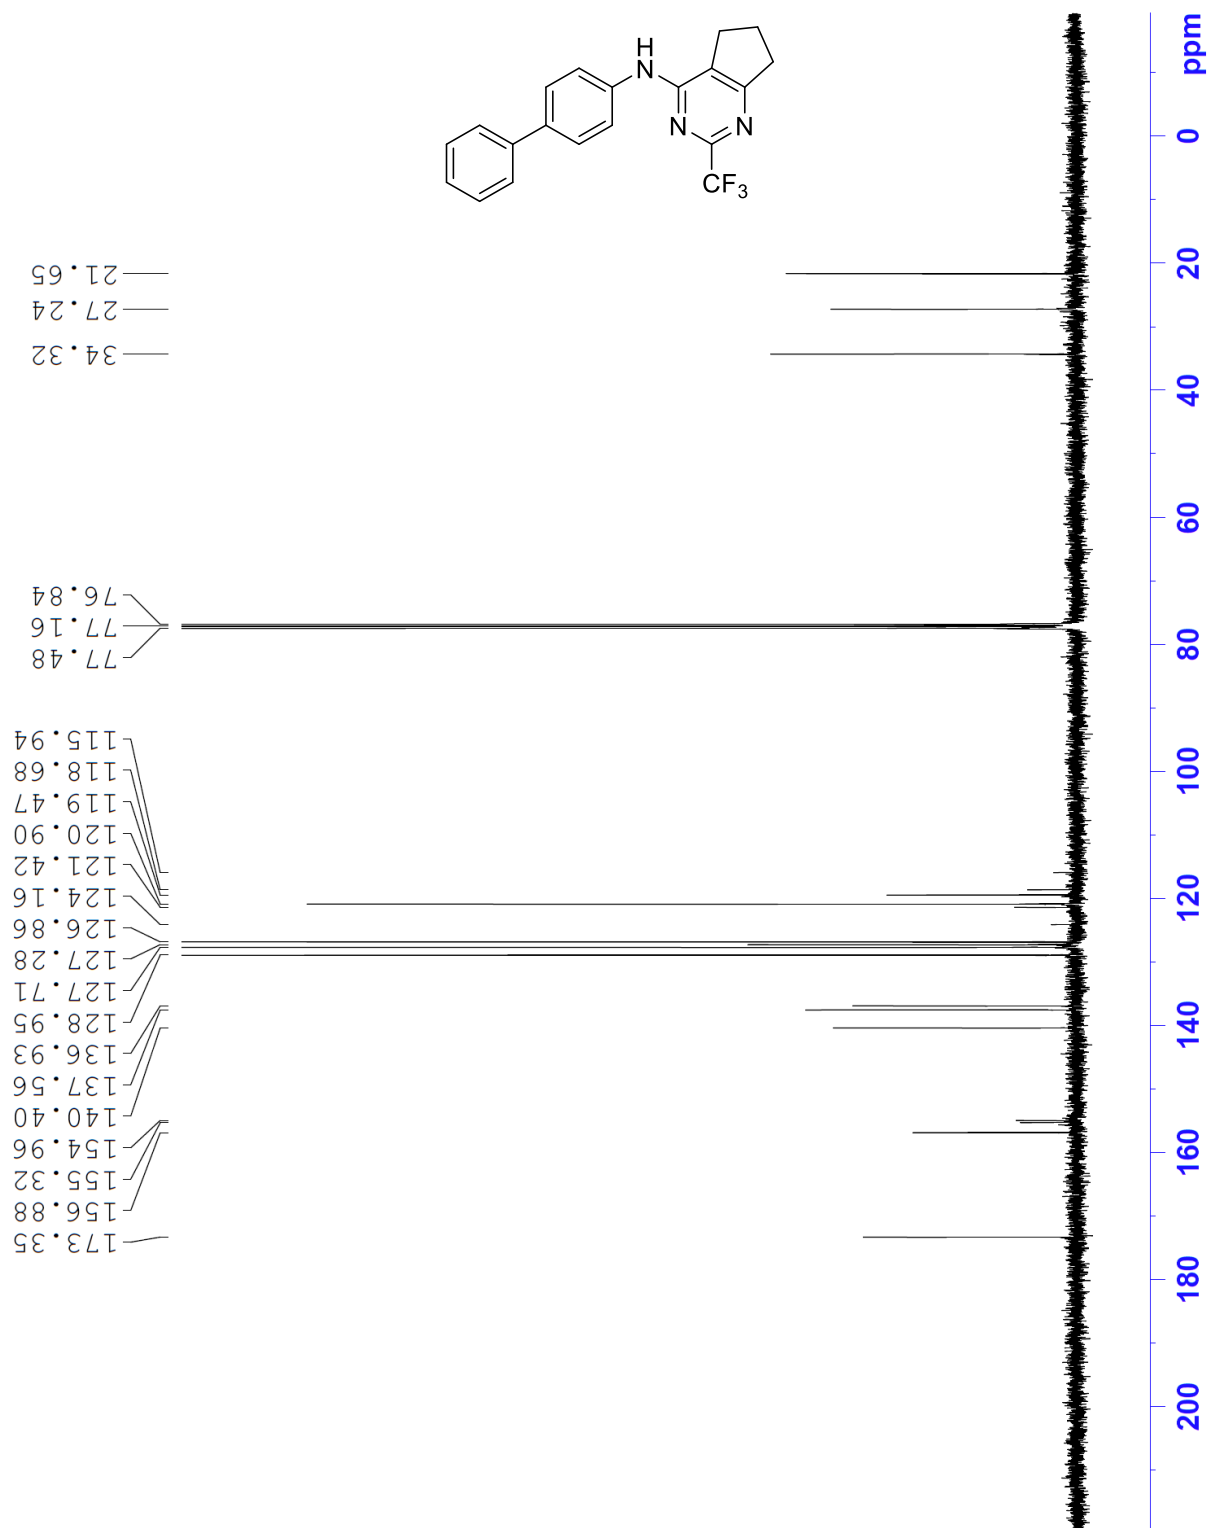

<sup>19</sup>F NMR (376 MHz, CDCl<sub>3</sub>) of *N*-([1,1'-Biphenyl]-4-yl)-2-(trifluoromethyl)-6,7-dihydro-5*H*-cyclopenta[*d*]pyrimidin-4-amine (3f)

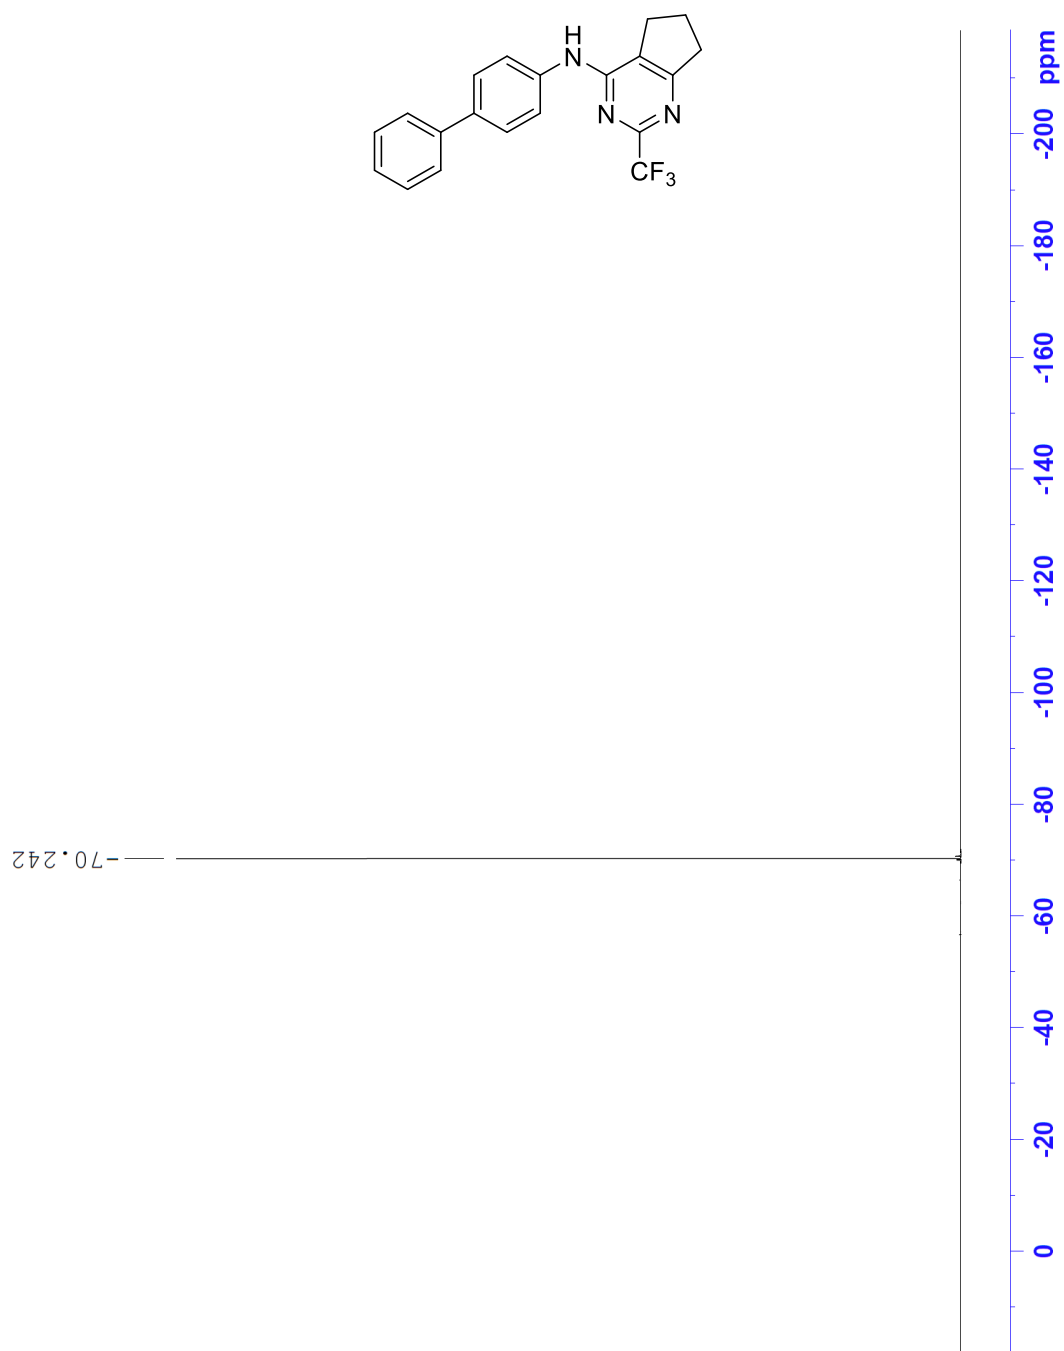



**<sup>1</sup>H NMR (400 MHz, CDCl<sub>3</sub>) of N-([1,1'-Biphenyl]-4-yl)-2-(trifluoromethyl)-5,6,7,8-tetrahydroquinazolin-4-amine (3g)**

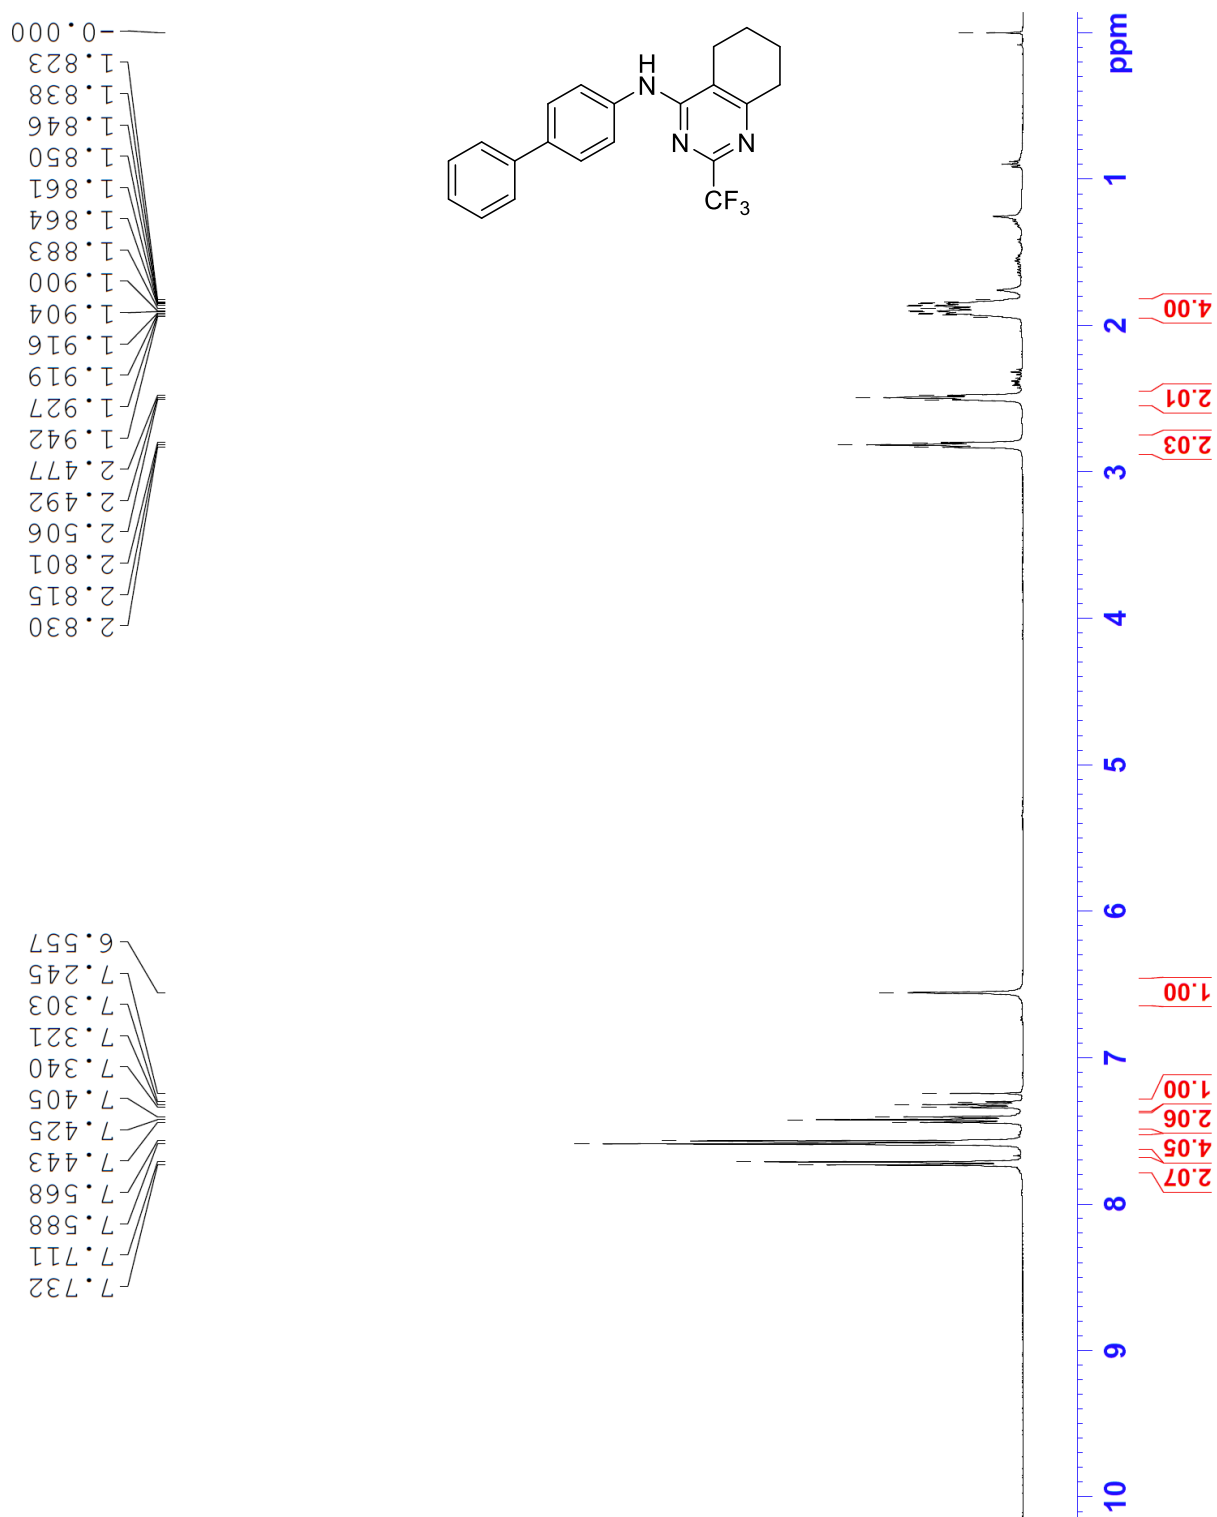

<sup>13</sup>C NMR (100.6 MHz, CDCl<sub>3</sub>) of *N*-([1,1'-Biphenyl]-4-yl)-2-(trifluoromethyl)-5,6,7,8-tetrahydroquinazolin-4-amine (3g)

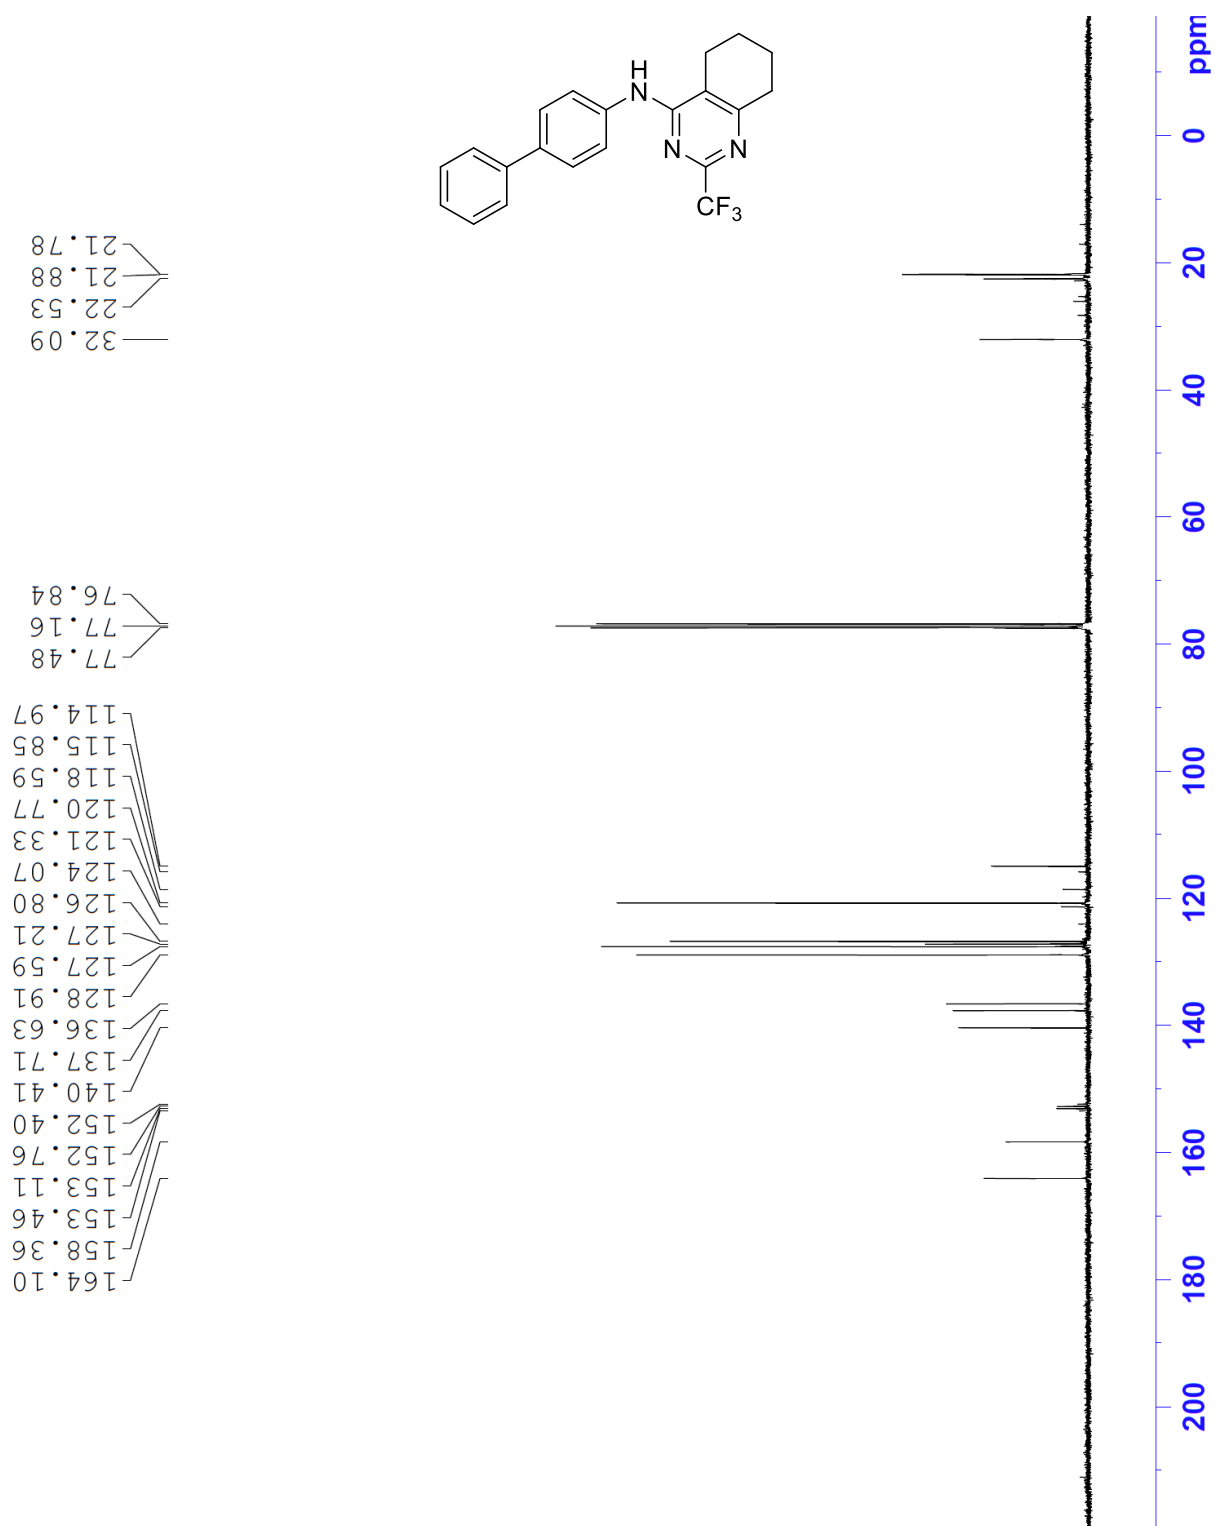

<sup>19</sup>F NMR (376 MHz, CDCl<sub>3</sub>) of *N*-([1,1'-Biphenyl]-4-yl)-2-(trifluoromethyl)-5,6,7,8-tetrahydroquinazolin-4-amine (3g)

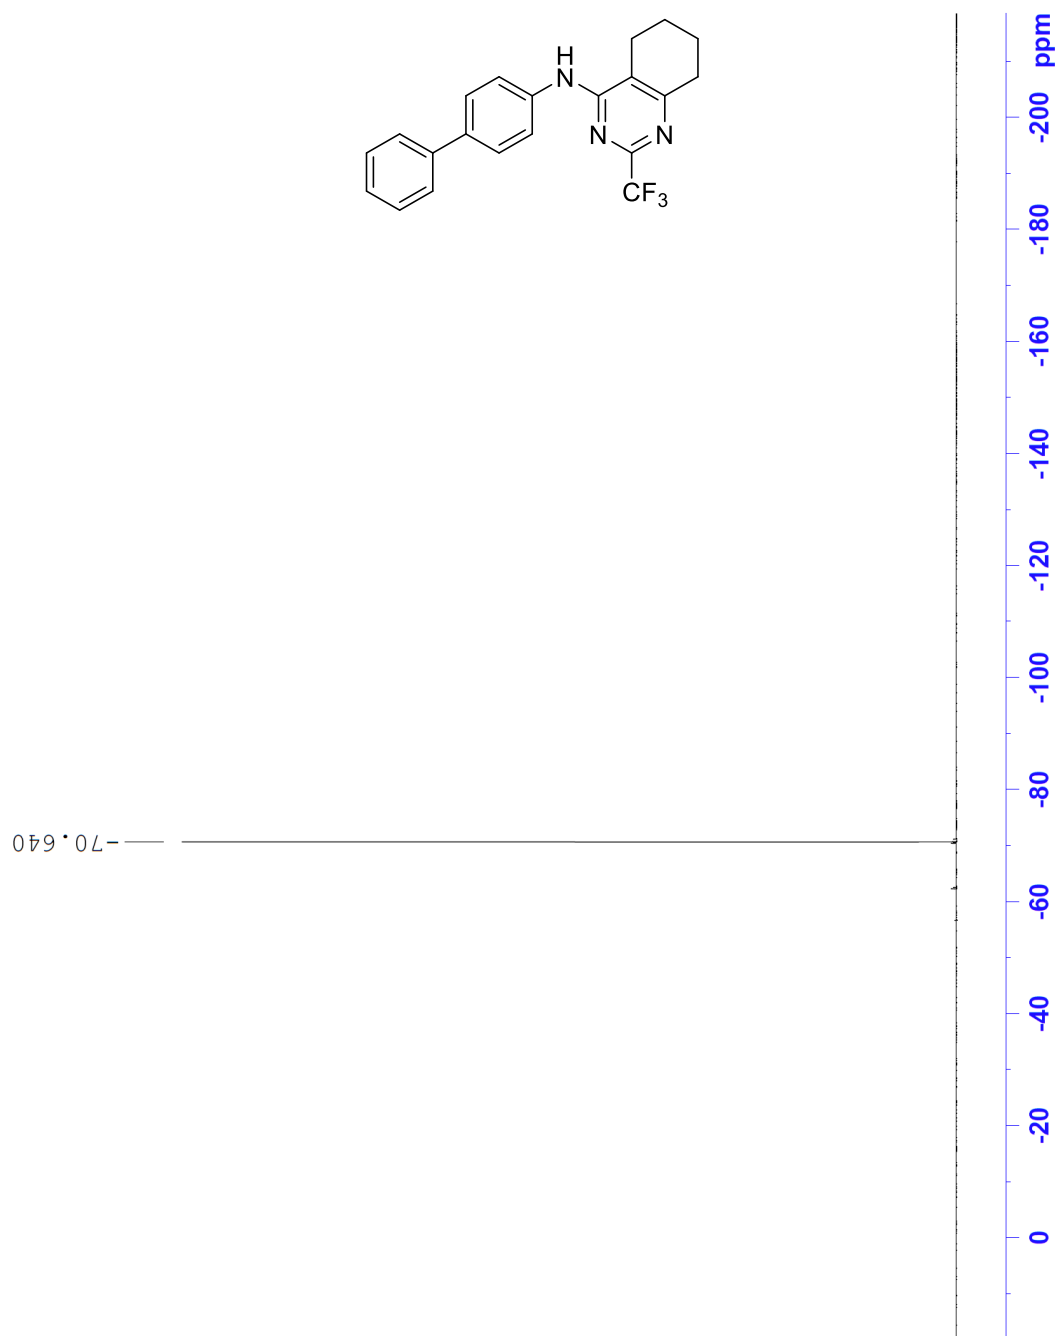

**<sup>1</sup>H NMR (600 MHz, CDCl<sub>3</sub>) of *N*-([1,1'-Biphenyl]-4-yl)-2-(trifluoromethyl)-6,7,8,9-tetrahydro-5*H*-cyclohepta[*d*]pyrimidin-4-amine (3h)**

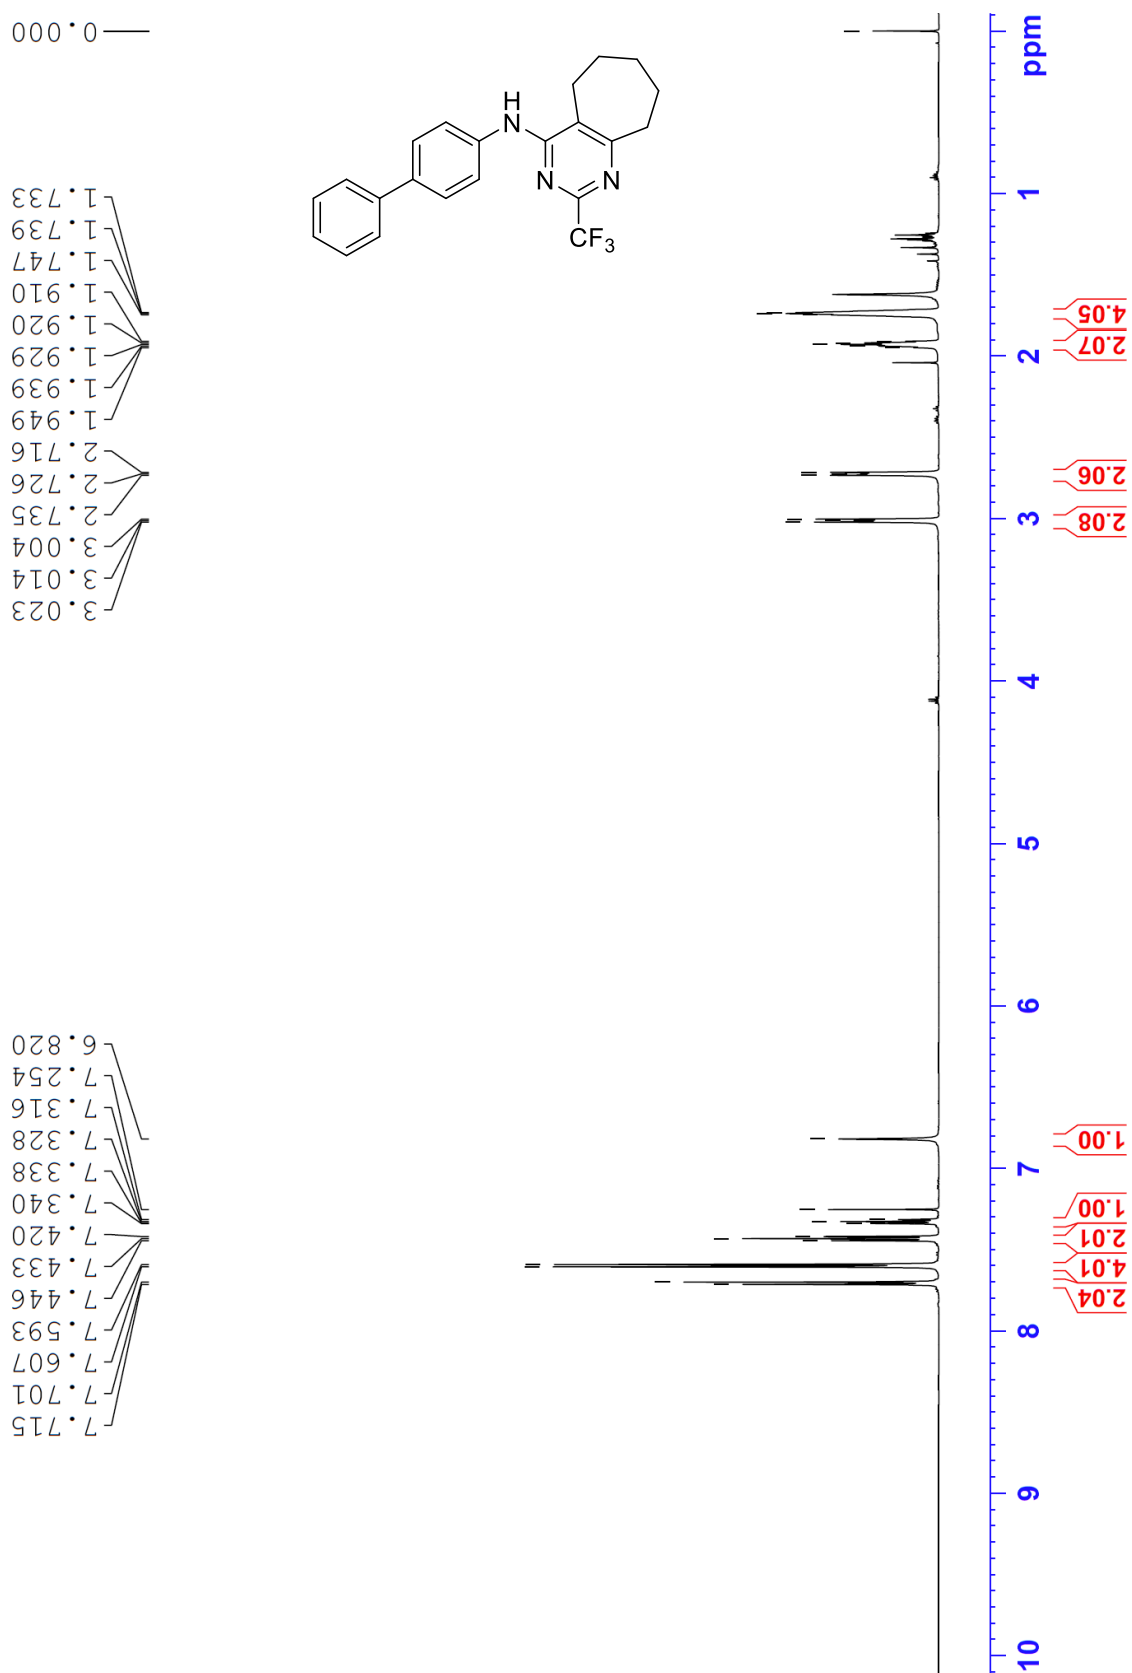

**<sup>13</sup>C NMR (100.6 MHz, CDCl<sub>3</sub>) of *N*-([1,1'-Biphenyl]-4-yl)-2-(trifluoromethyl)-6,7,8,9-tetrahydro-5*H*-cyclohepta[*d*]pyrimidin-4-amine (3h)**

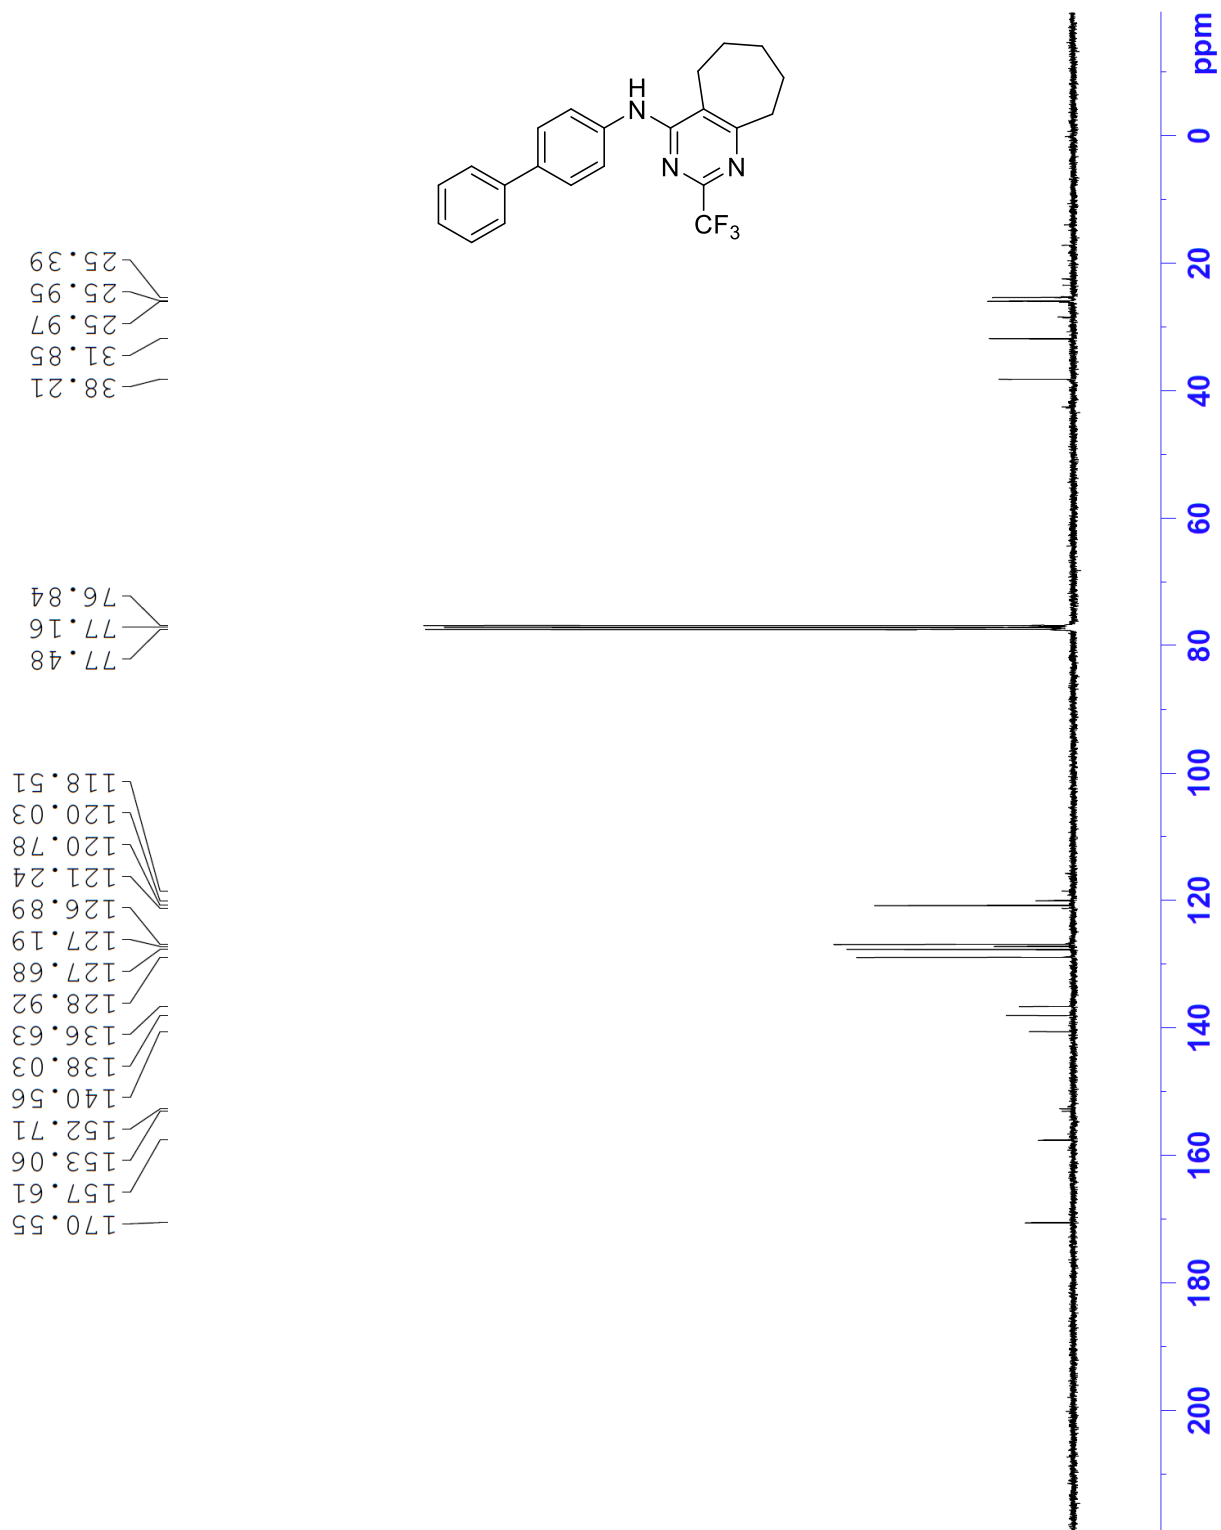

<sup>19</sup>F NMR (565 MHz, CDCl<sub>3</sub>) of *N*-([1,1'-Biphenyl]-4-yl)-2-(trifluoromethyl)-6,7,8,9-tetrahydro-5*H*-cyclohepta[*d*]pyrimidin-4-amine (3h)

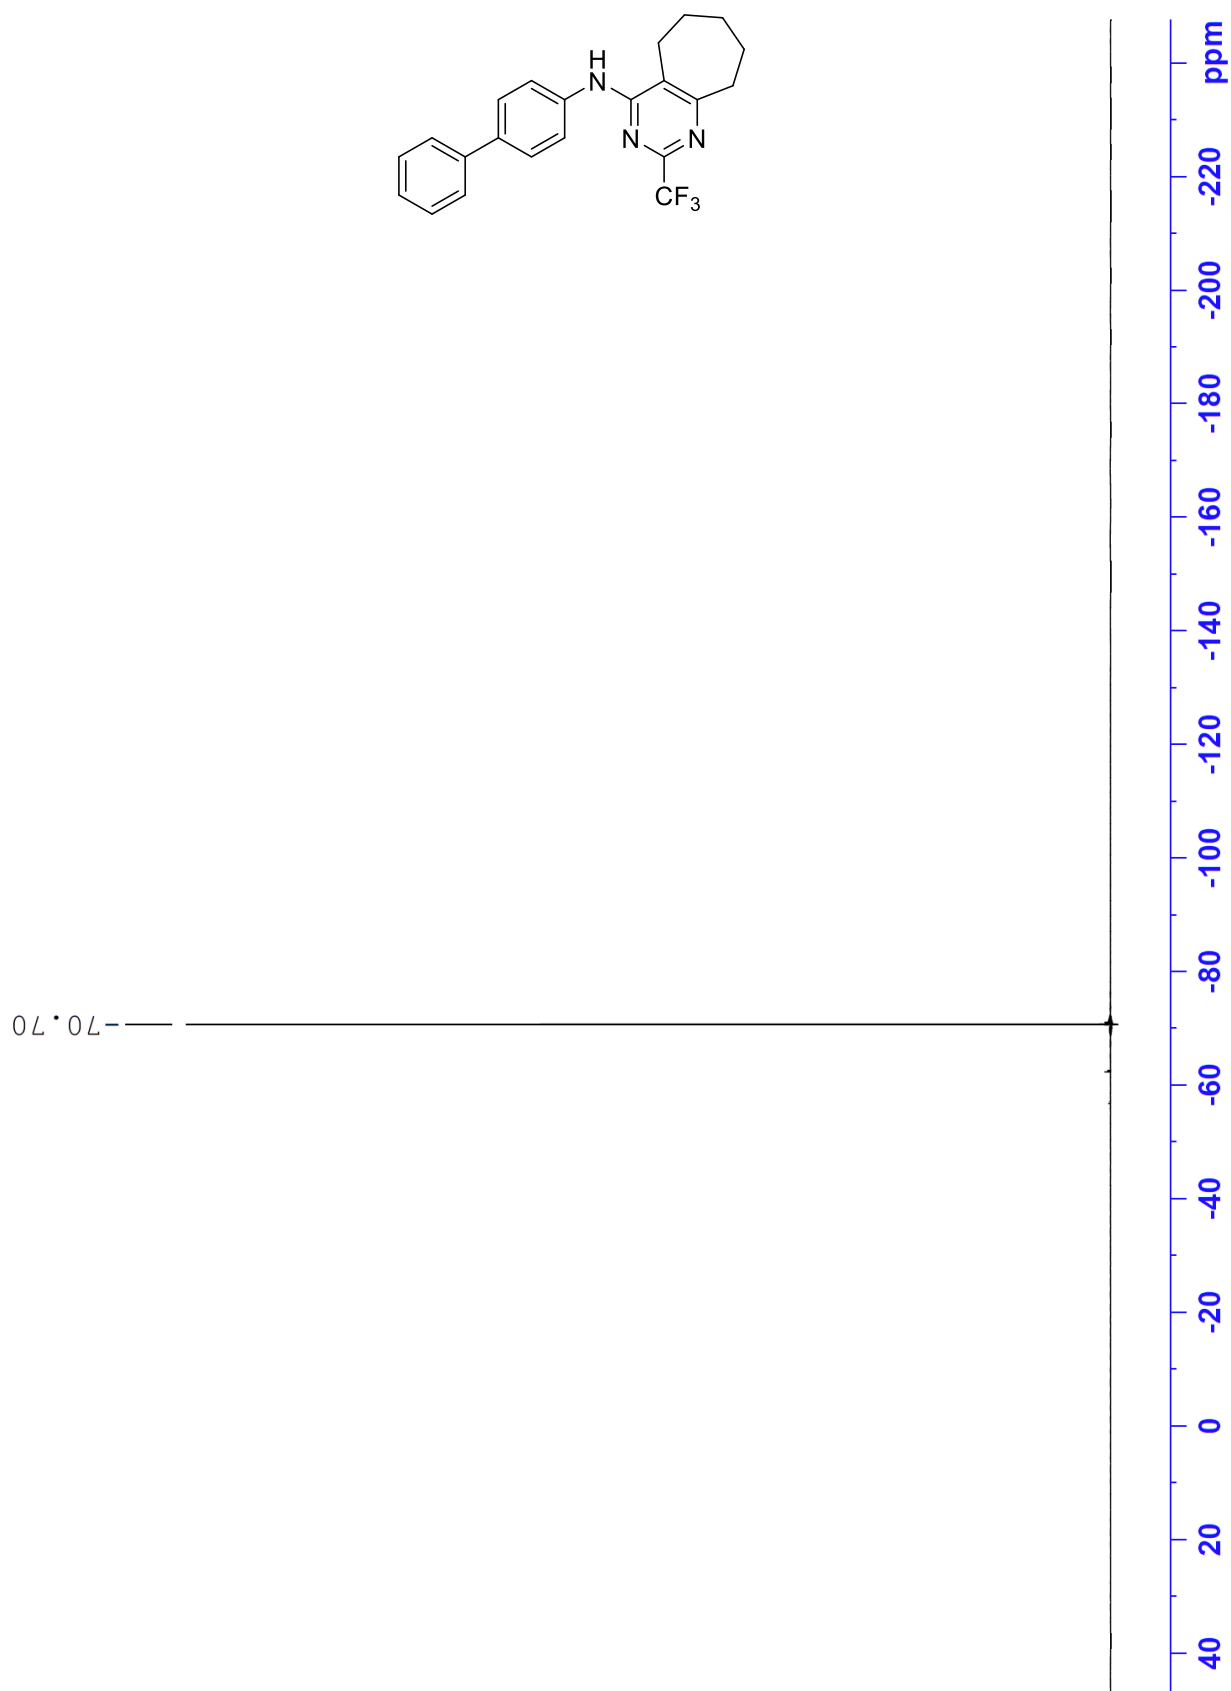

<sup>1</sup>H NMR (400 MHz, CDCl<sub>3</sub>) of 6-Methyl-N-(4'-methyl-[1,1'-biphenyl]-4-yl)-2-(trifluoromethyl)pyrimidin-4-amine (3i)

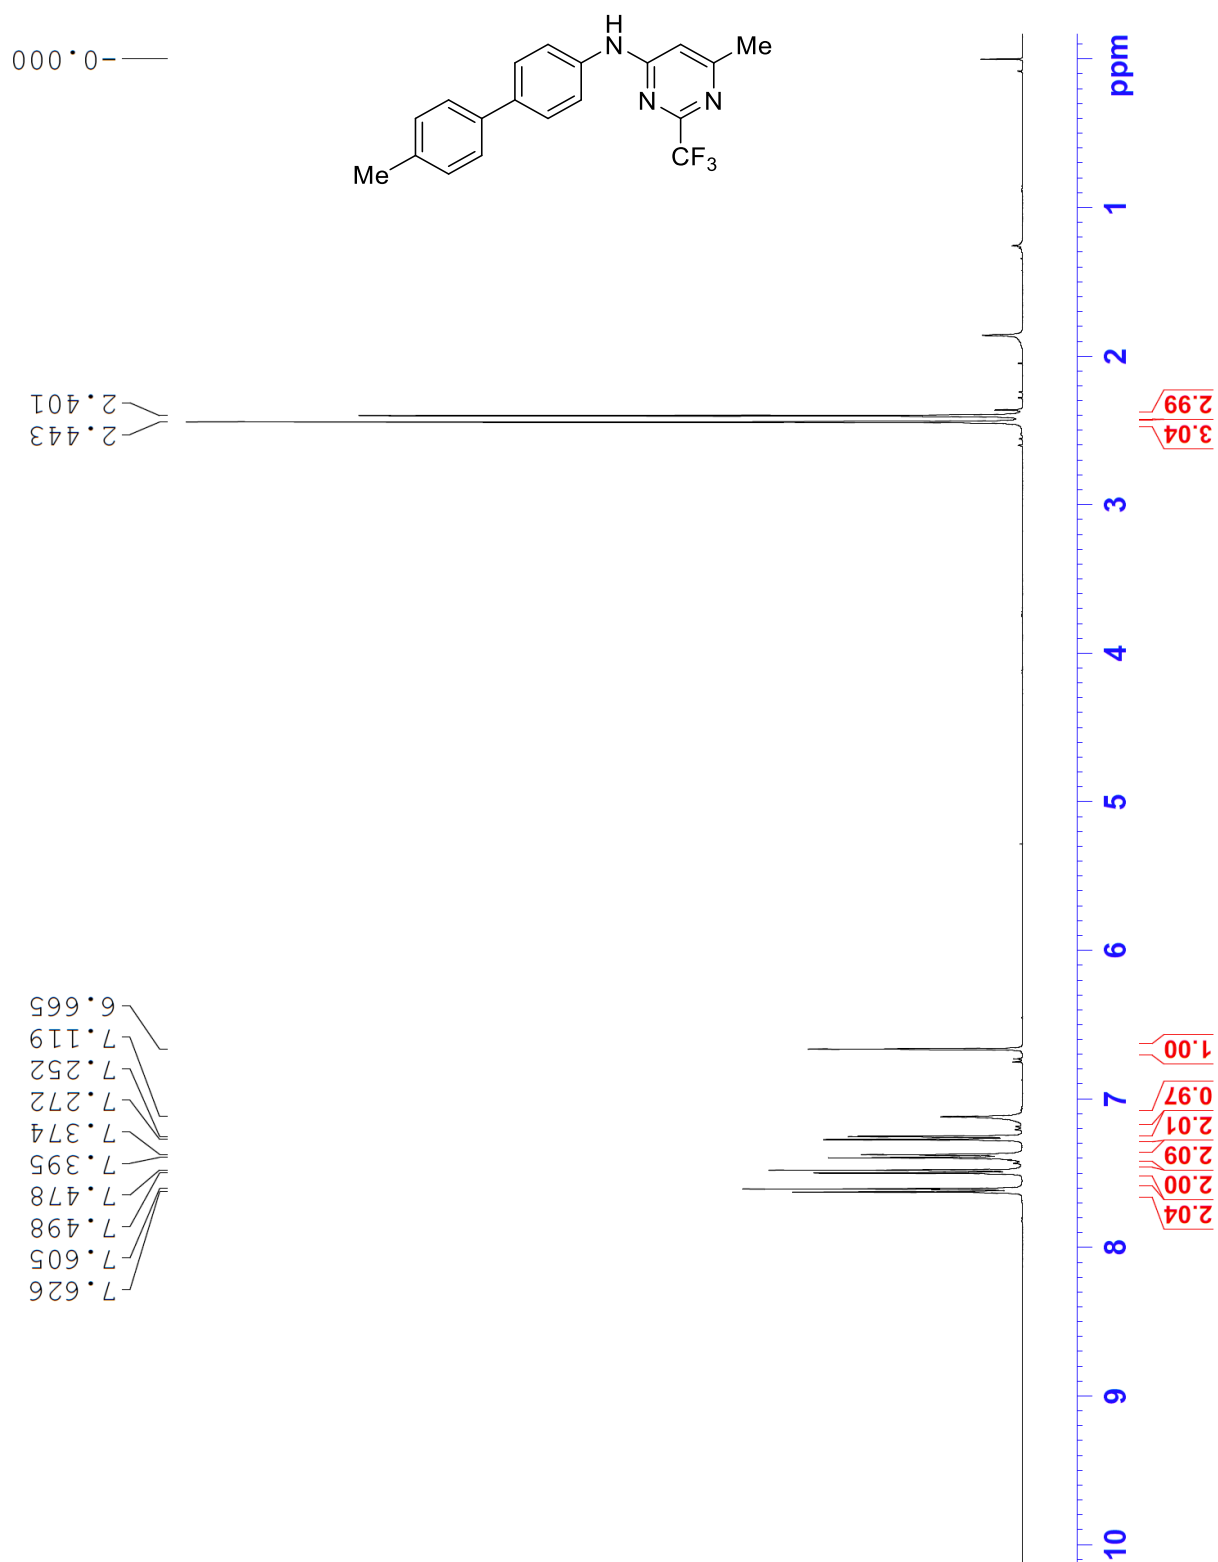

<sup>13</sup>C NMR (100.6 MHz, CDCl<sub>3</sub>) of 6-Methyl-N-(4'-methyl-[1,1'-biphenyl]-4-yl)-2-(trifluoromethyl)pyrimidin-4-amine (3i)

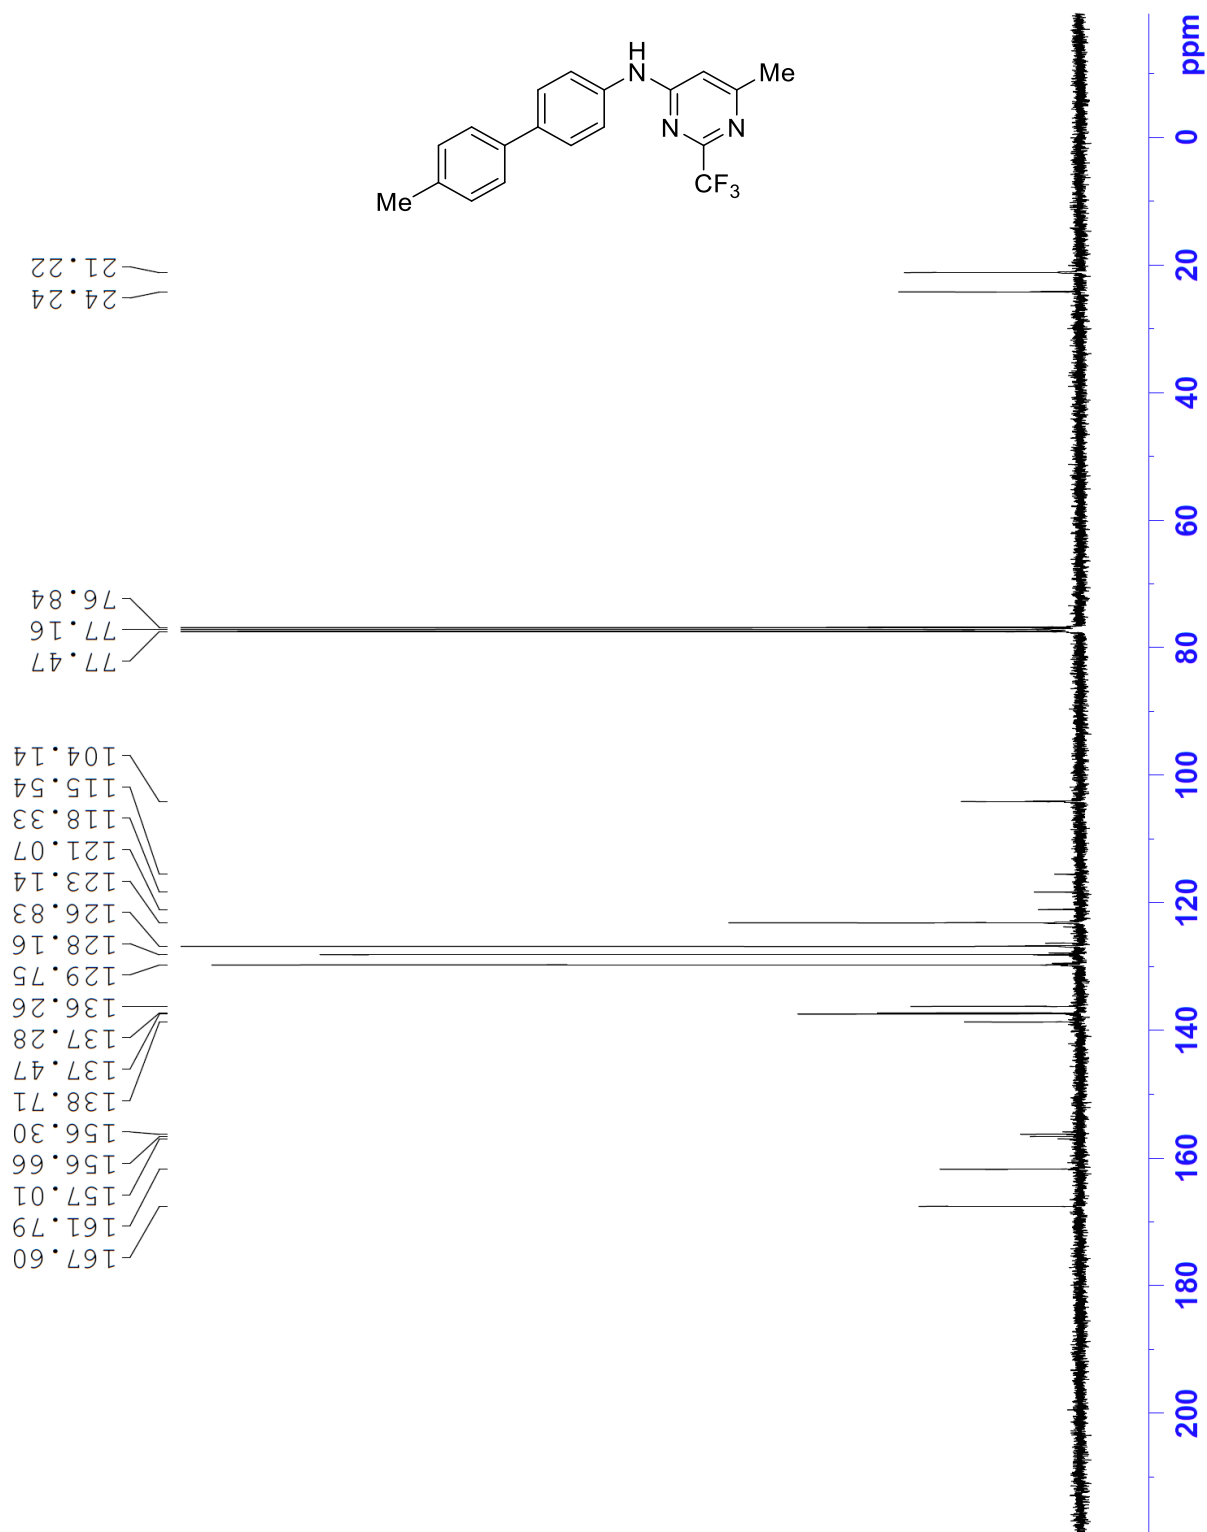



$^{19}\text{F}$  NMR (376 MHz,  $\text{CDCl}_3$ ) of 6-Methyl-N-(4'-methyl-[1,1'-biphenyl]-4-yl)-2-(trifluoromethyl)pyrimidin-4-amine (3i)

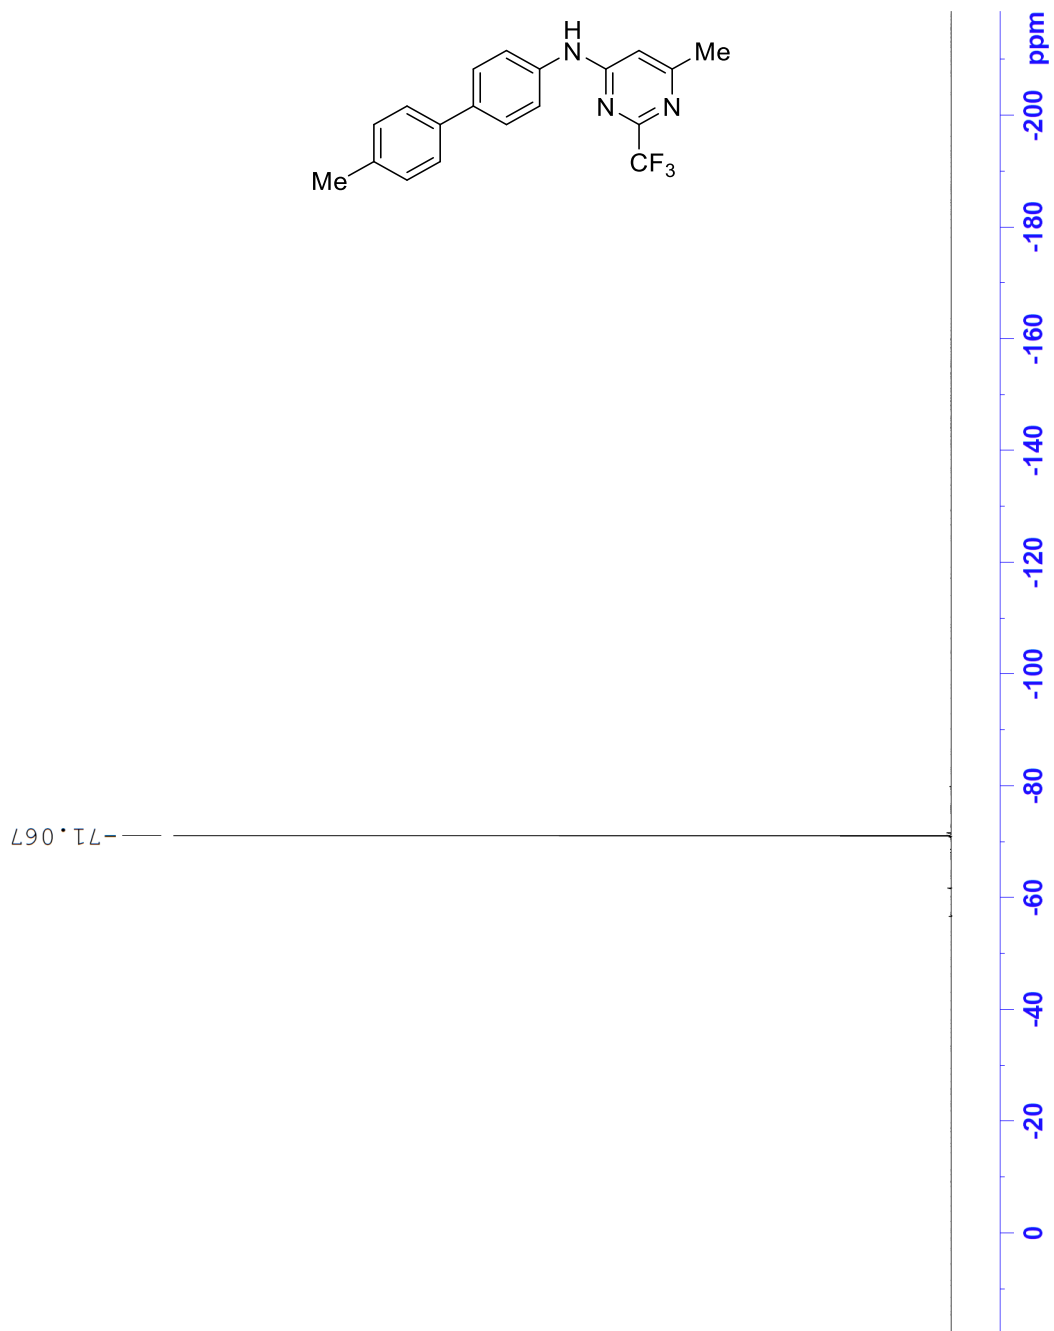

<sup>1</sup>H NMR (400 MHz, CDCl<sub>3</sub>) of *N*-(4'-Methoxy-[1,1'-biphenyl]-4-yl)-6-methyl-2-(trifluoromethyl)pyrimidin-4-amine (3j)

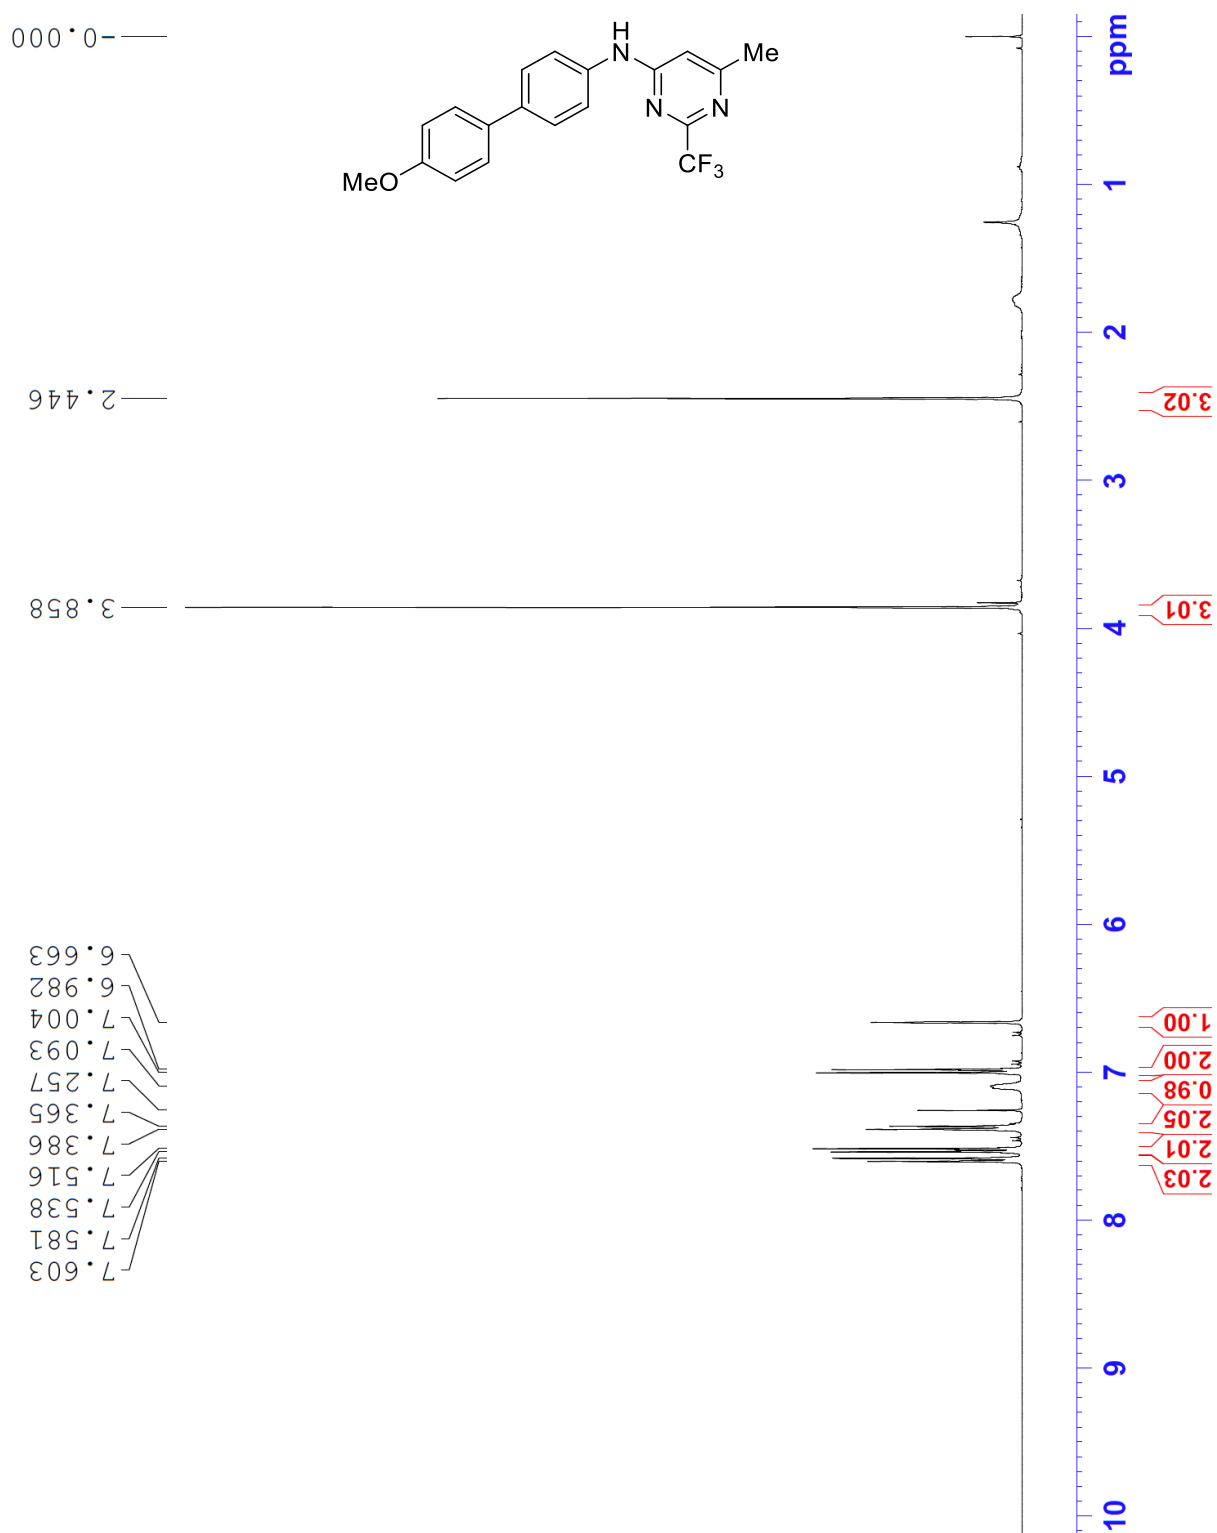

$^{13}\text{C}$  NMR (100.6 MHz,  $\text{CDCl}_3$ ) of *N*-(4'-Methoxy-[1,1'-biphenyl]-4-yl)-6-methyl-2-(trifluoromethyl)pyrimidin-4-amine (3j)

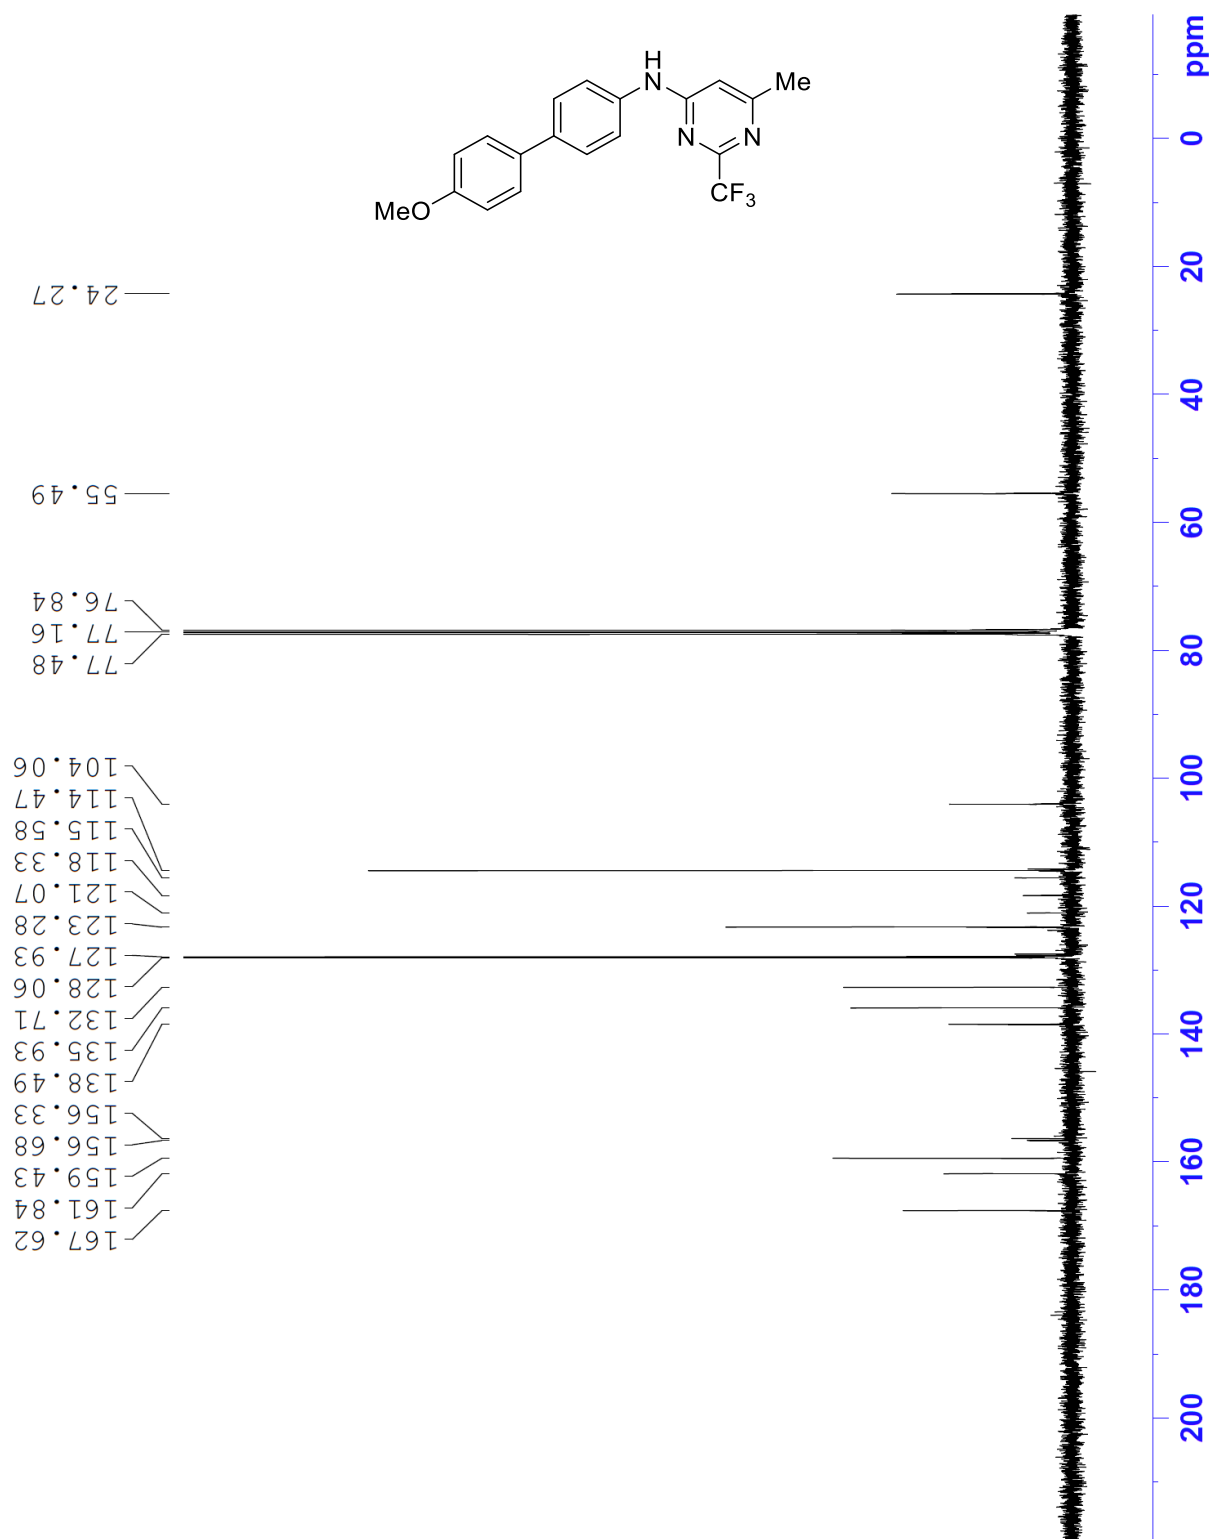

$^{19}\text{F}$  NMR (376 MHz,  $\text{CDCl}_3$ ) of *N*-(4'-Methoxy-[1,1'-biphenyl]-4-yl)-6-methyl-2-(trifluoromethyl)pyrimidin-4-amine (3j)

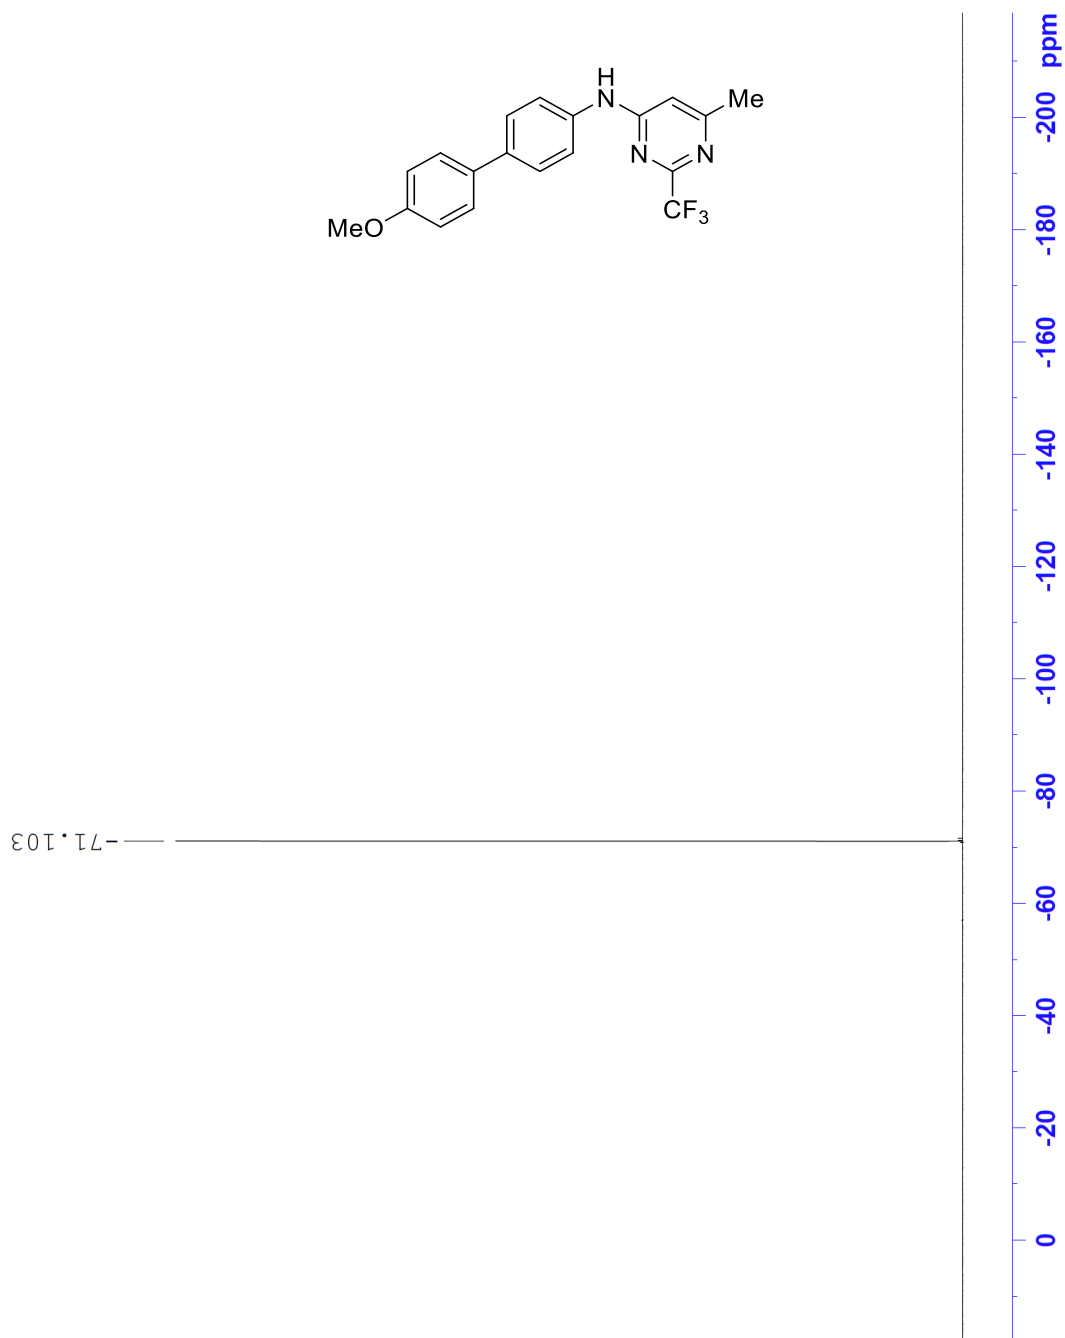

<sup>1</sup>H NMR (400 MHz, CDCl<sub>3</sub>) of N-(4'-Fluoro-[1,1'-biphenyl]-4-yl)-6-methyl-2-(trifluoromethyl)pyrimidin-4-amine (3k)

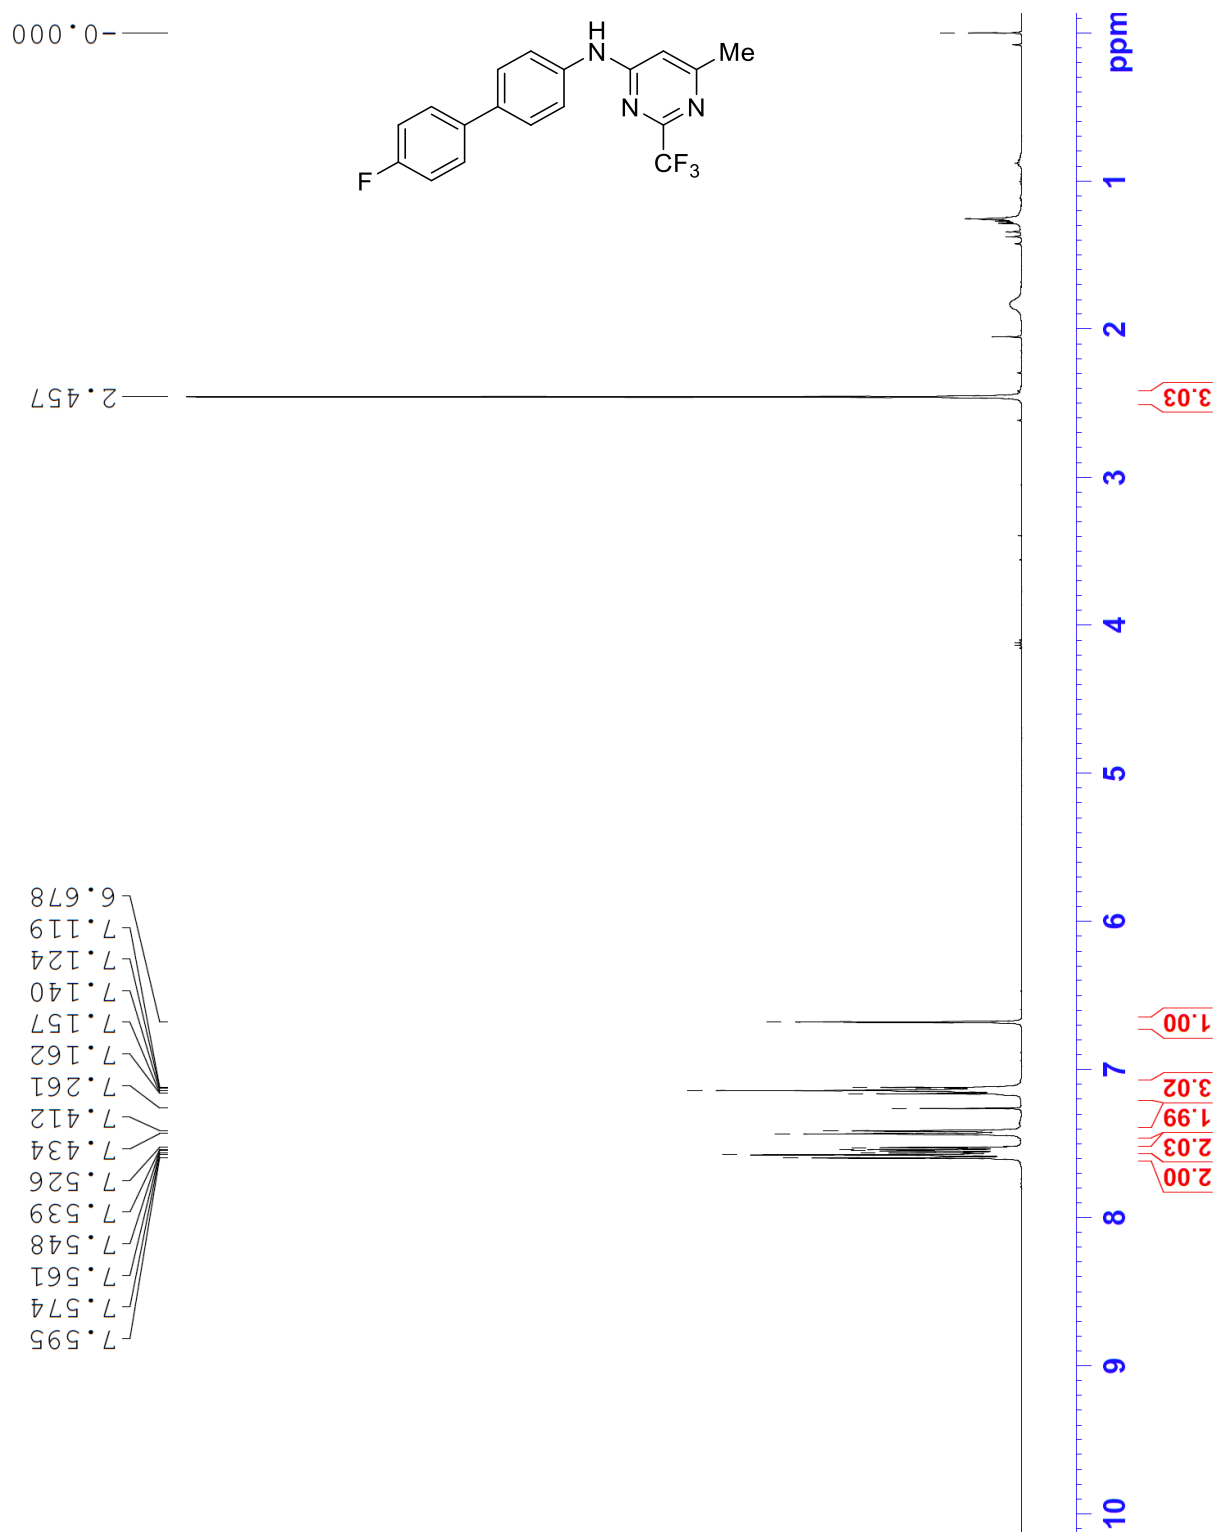

<sup>13</sup>C NMR (100.6 MHz, CDCl<sub>3</sub>) of *N*-(4'-Fluoro-[1,1'-biphenyl]-4-yl)-6-methyl-2-(trifluoromethyl)pyrimidin-4-amine (3k)

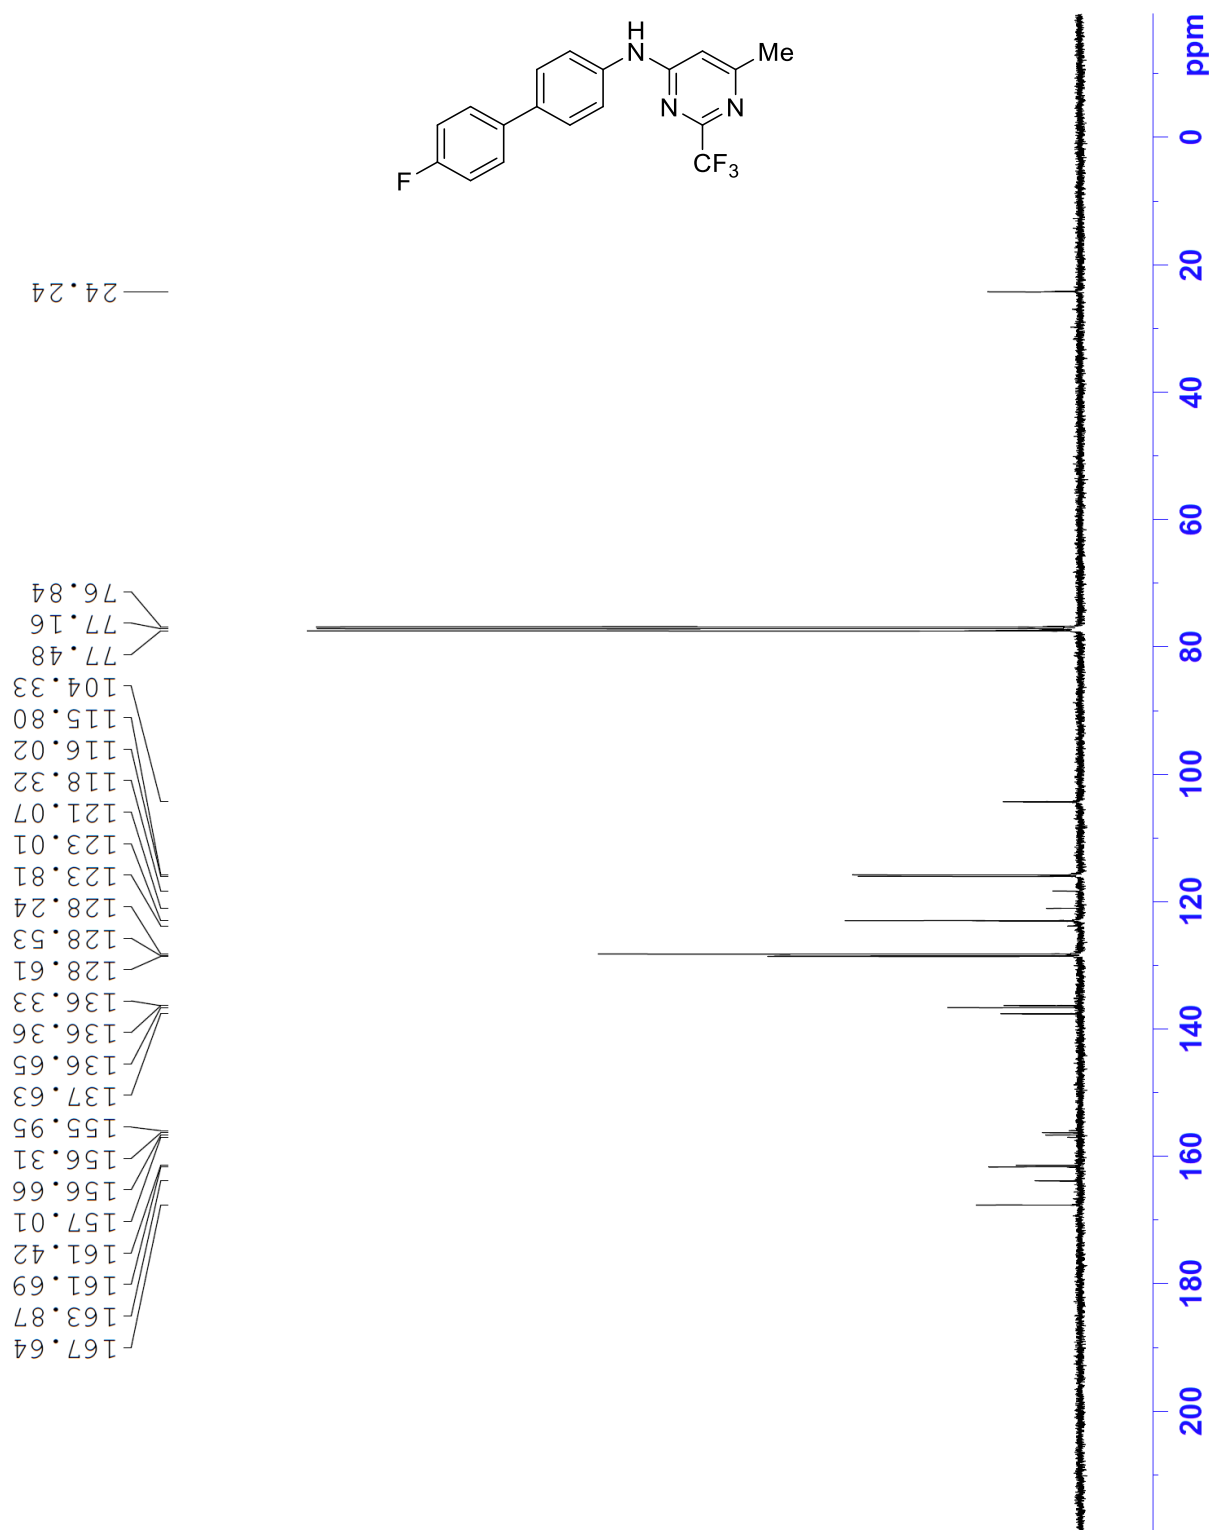

<sup>19</sup>F NMR (376 MHz, CDCl<sub>3</sub>) of *N*-(4'-Fluoro-[1,1'-biphenyl]-4-yl)-6-methyl-2-(trifluoromethyl)pyrimidin-4-amine (3k)

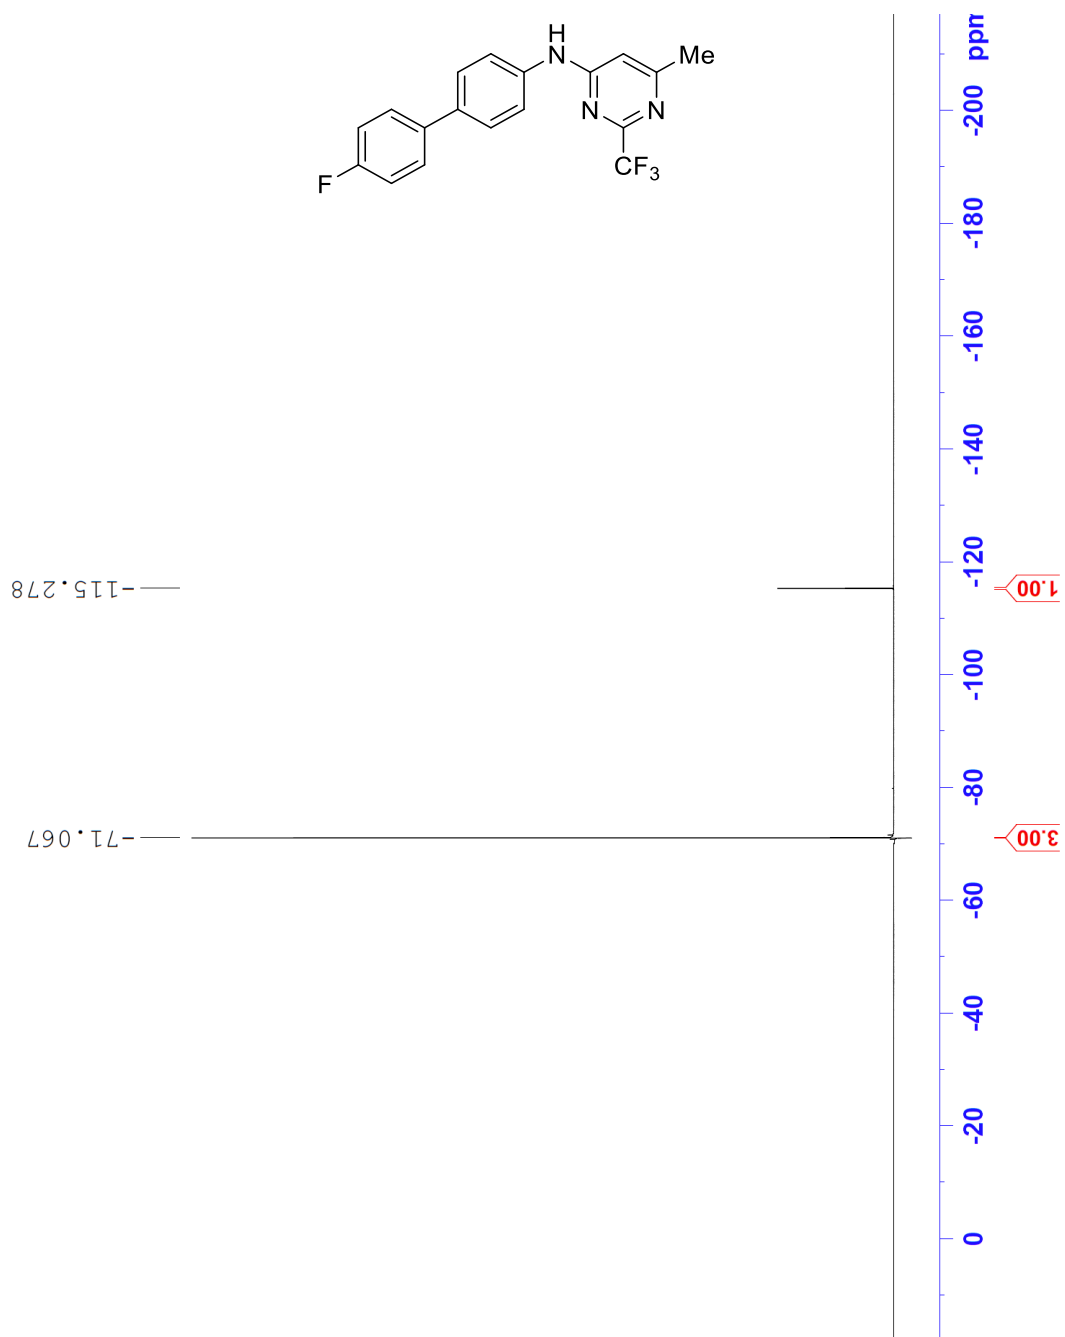

<sup>1</sup>H NMR (400 MHz, CDCl<sub>3</sub>) of *N*-(4'-Chloro-[1,1'-biphenyl]-4-yl)-6-methyl-2-(trifluoromethyl)pyrimidin-4-amine (31)

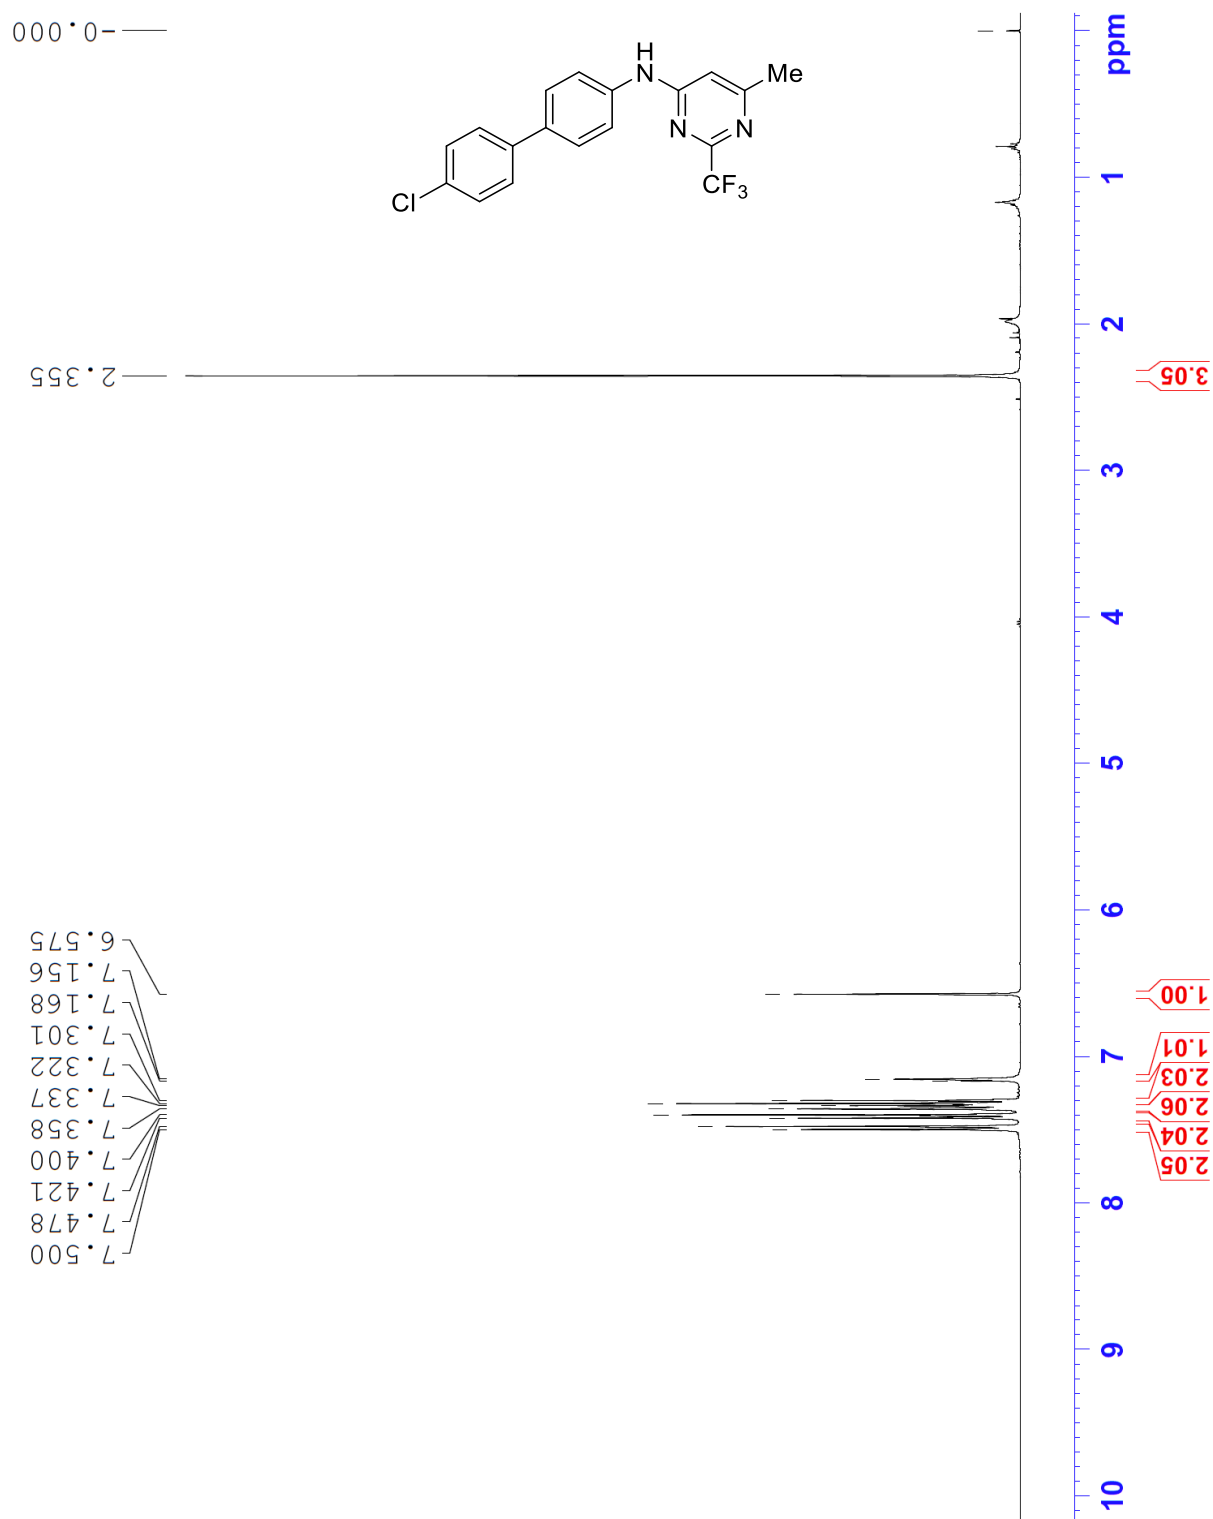



<sup>13</sup>C NMR (100.6 MHz, CDCl<sub>3</sub>) of *N*-(4'-Chloro-[1,1'-biphenyl]-4-yl)-6-methyl-2-(trifluoromethyl)pyrimidin-4-amine (3l)

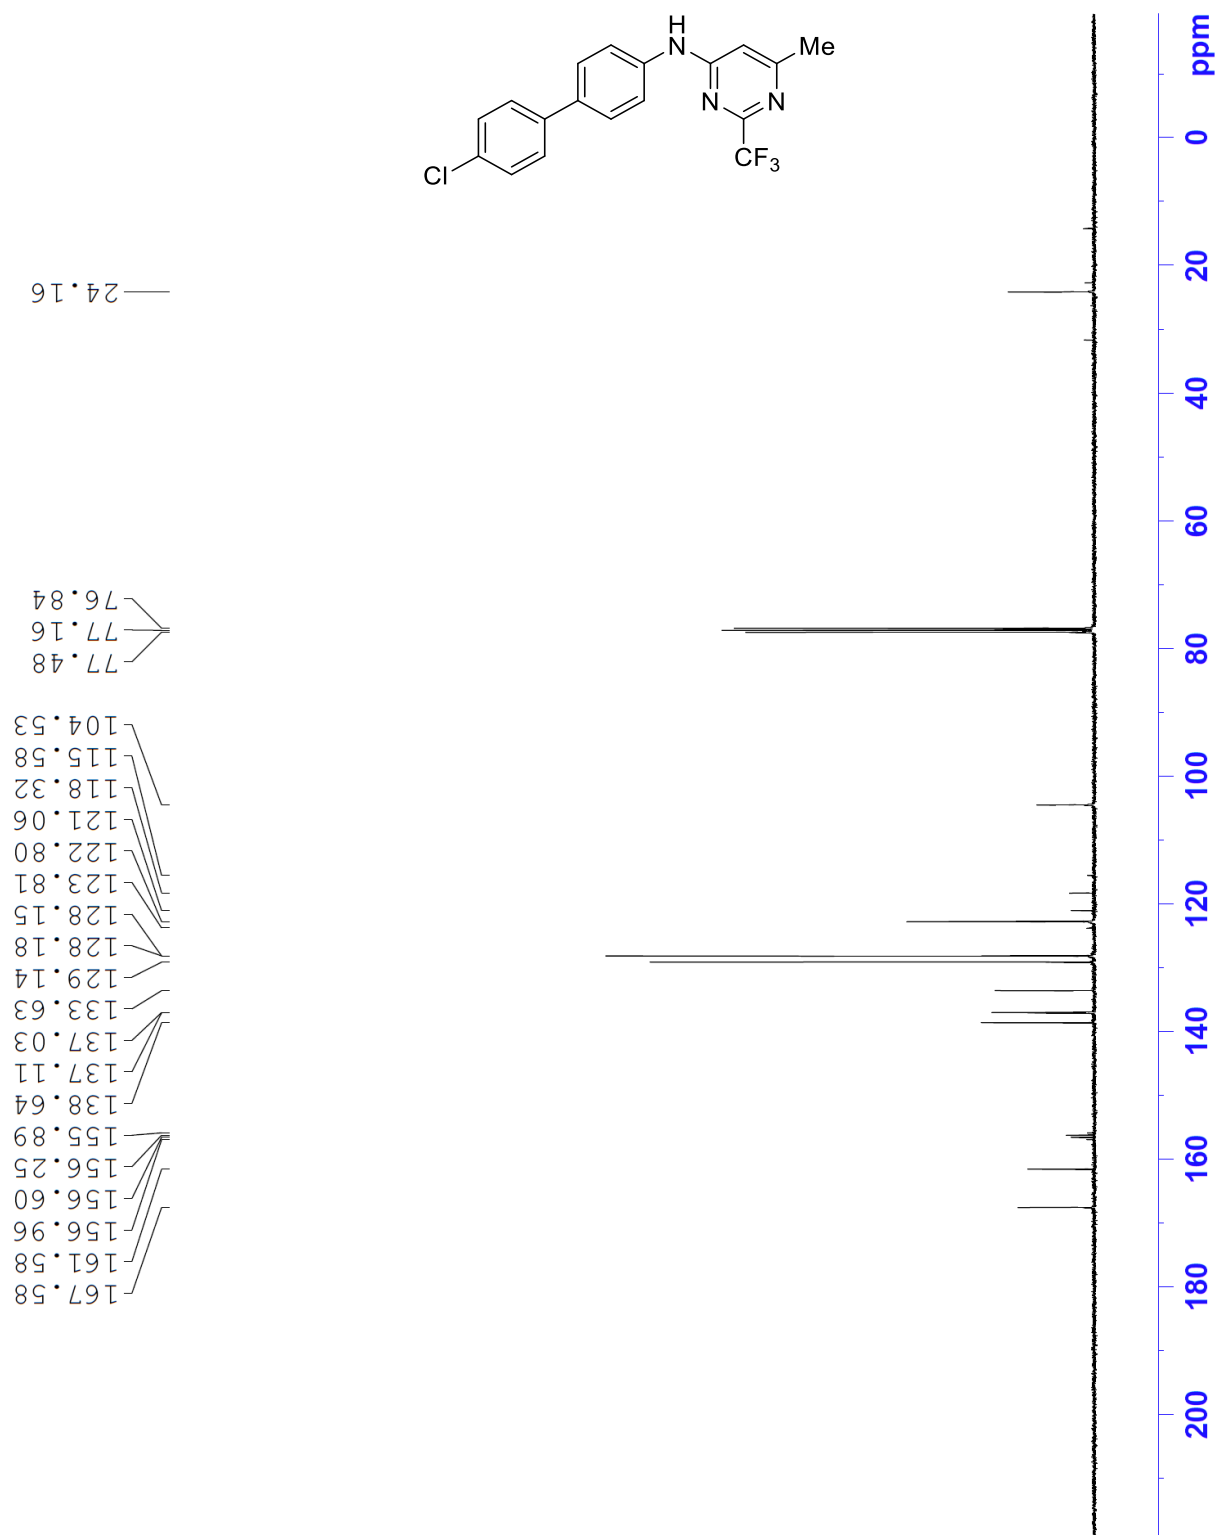

$^{19}\text{F}$  NMR (376 MHz,  $\text{CDCl}_3$ ) of *N*-(4'-Chloro-[1,1'-biphenyl]-4-yl)-6-methyl-2-(trifluoromethyl)pyrimidin-4-amine (31)

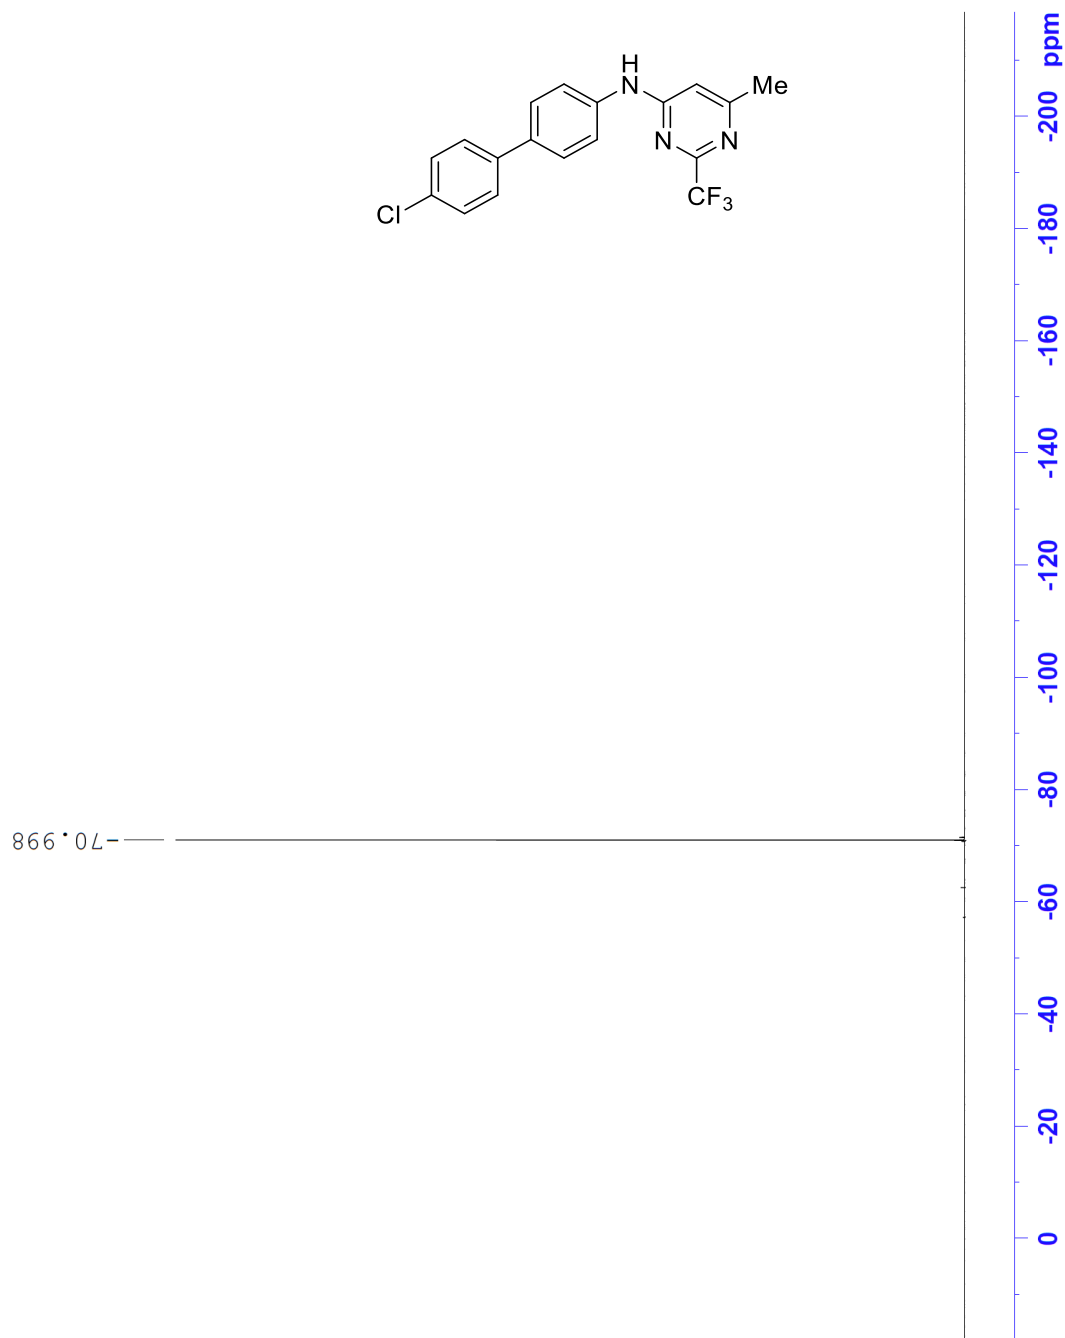

<sup>1</sup>H NMR (400 MHz, CDCl<sub>3</sub>) of *N*-(4'-Bromo-[1,1'-biphenyl]-4-yl)-6-methyl-2-(trifluoromethyl)pyrimidin-4-amine (3m)

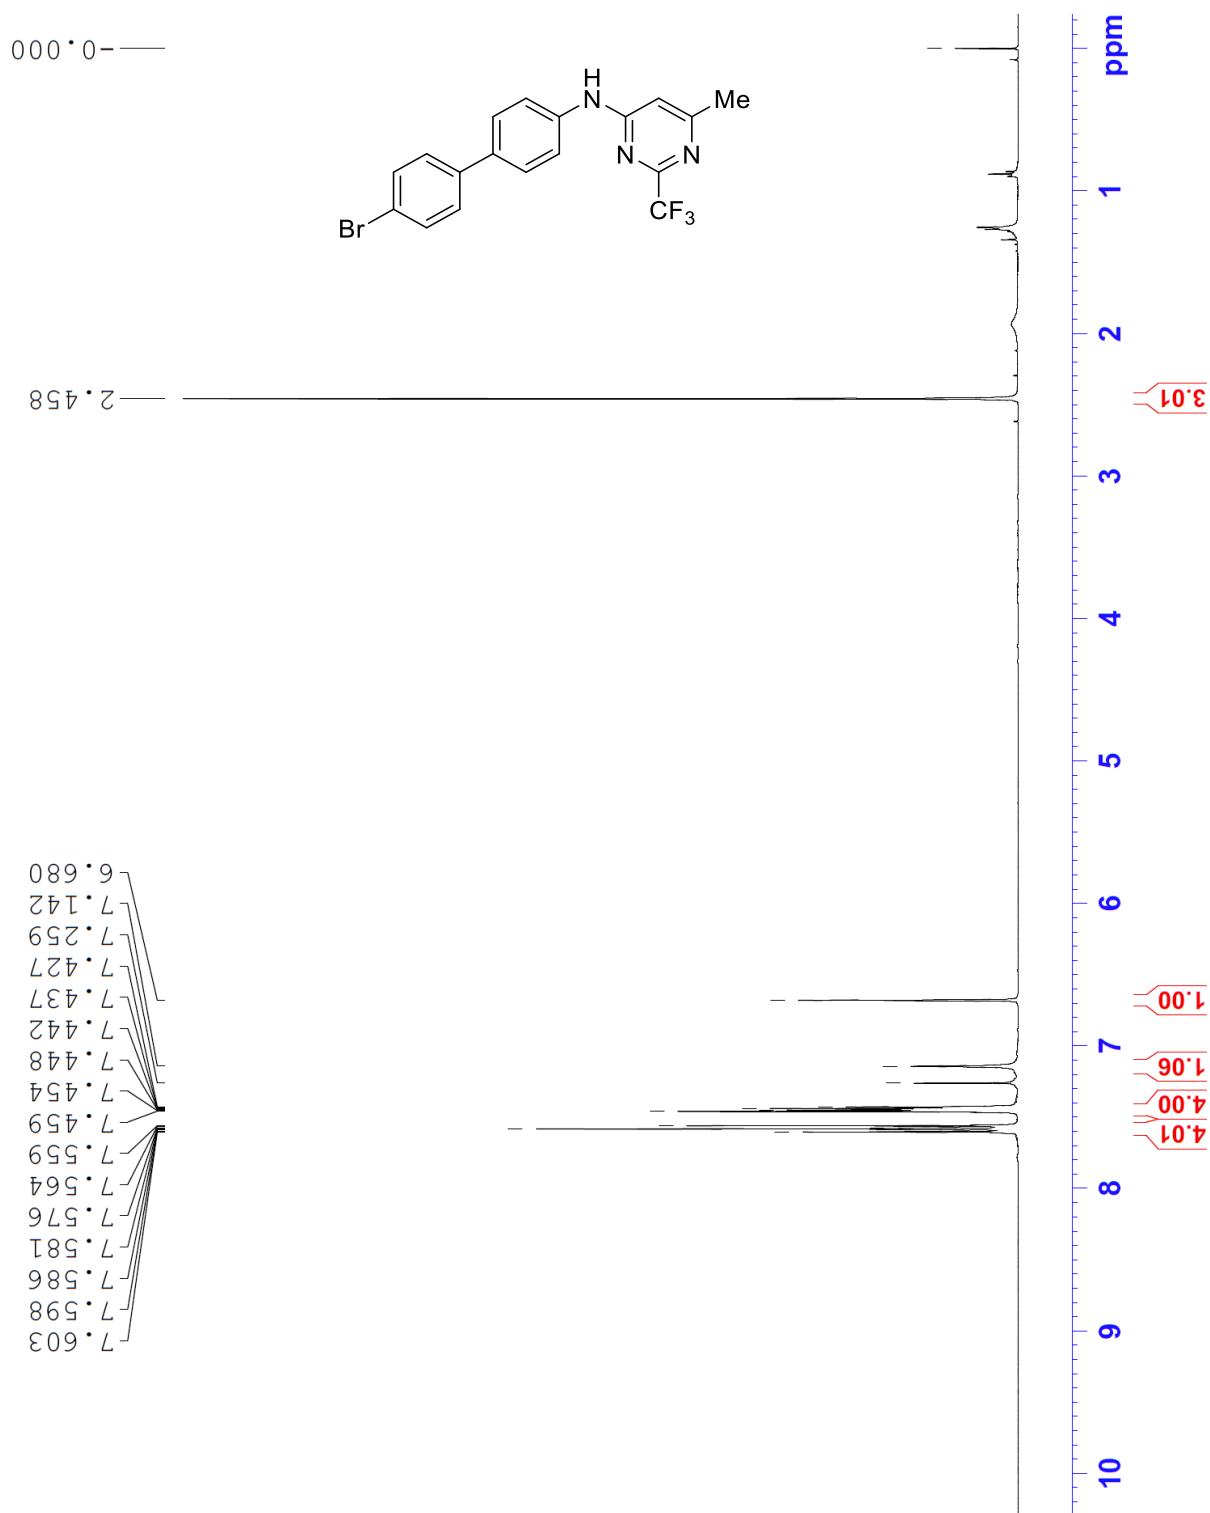

<sup>13</sup>C NMR (100.6 MHz, CDCl<sub>3</sub>) of *N*-(4'-Bromo-[1,1'-biphenyl]-4-yl)-6-methyl-2-(trifluoromethyl)pyrimidin-4-amine (3m)

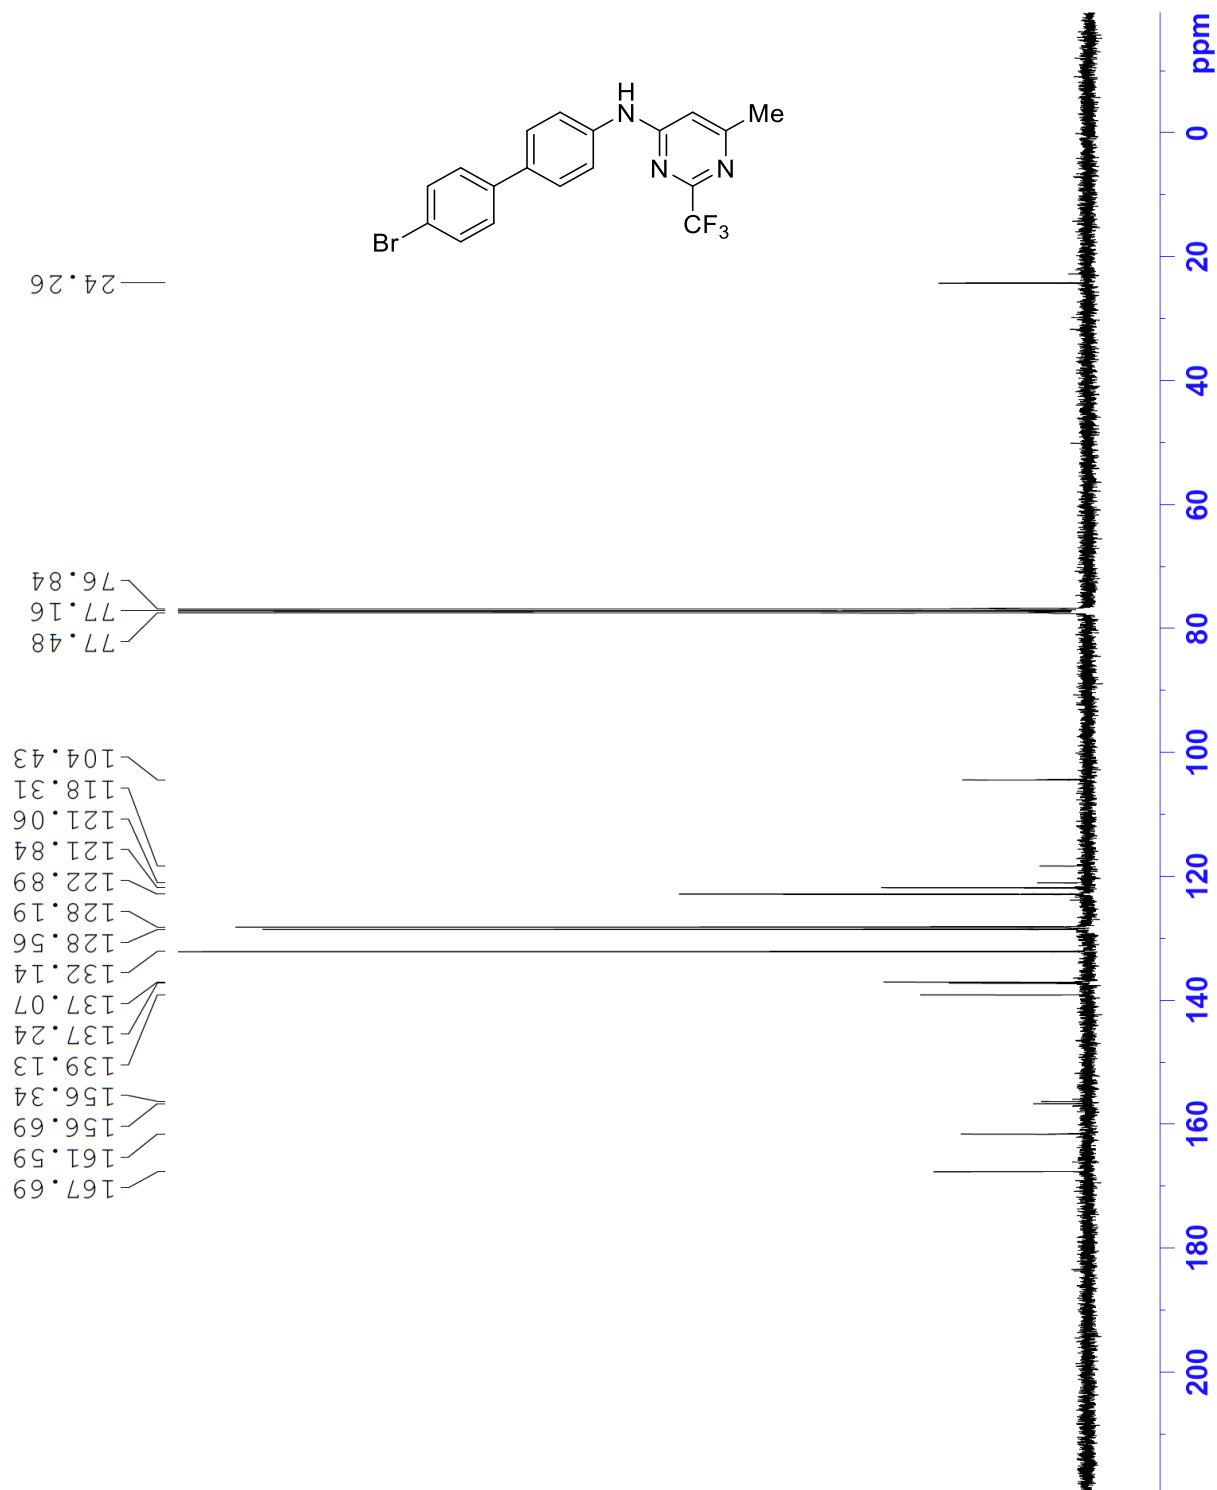

$^{19}\text{F}$  NMR (376 MHz,  $\text{CDCl}_3$ ) of *N*-(4'-Bromo-[1,1'-biphenyl]-4-yl)-6-methyl-2-(trifluoromethyl)pyrimidin-4-amine (3m)

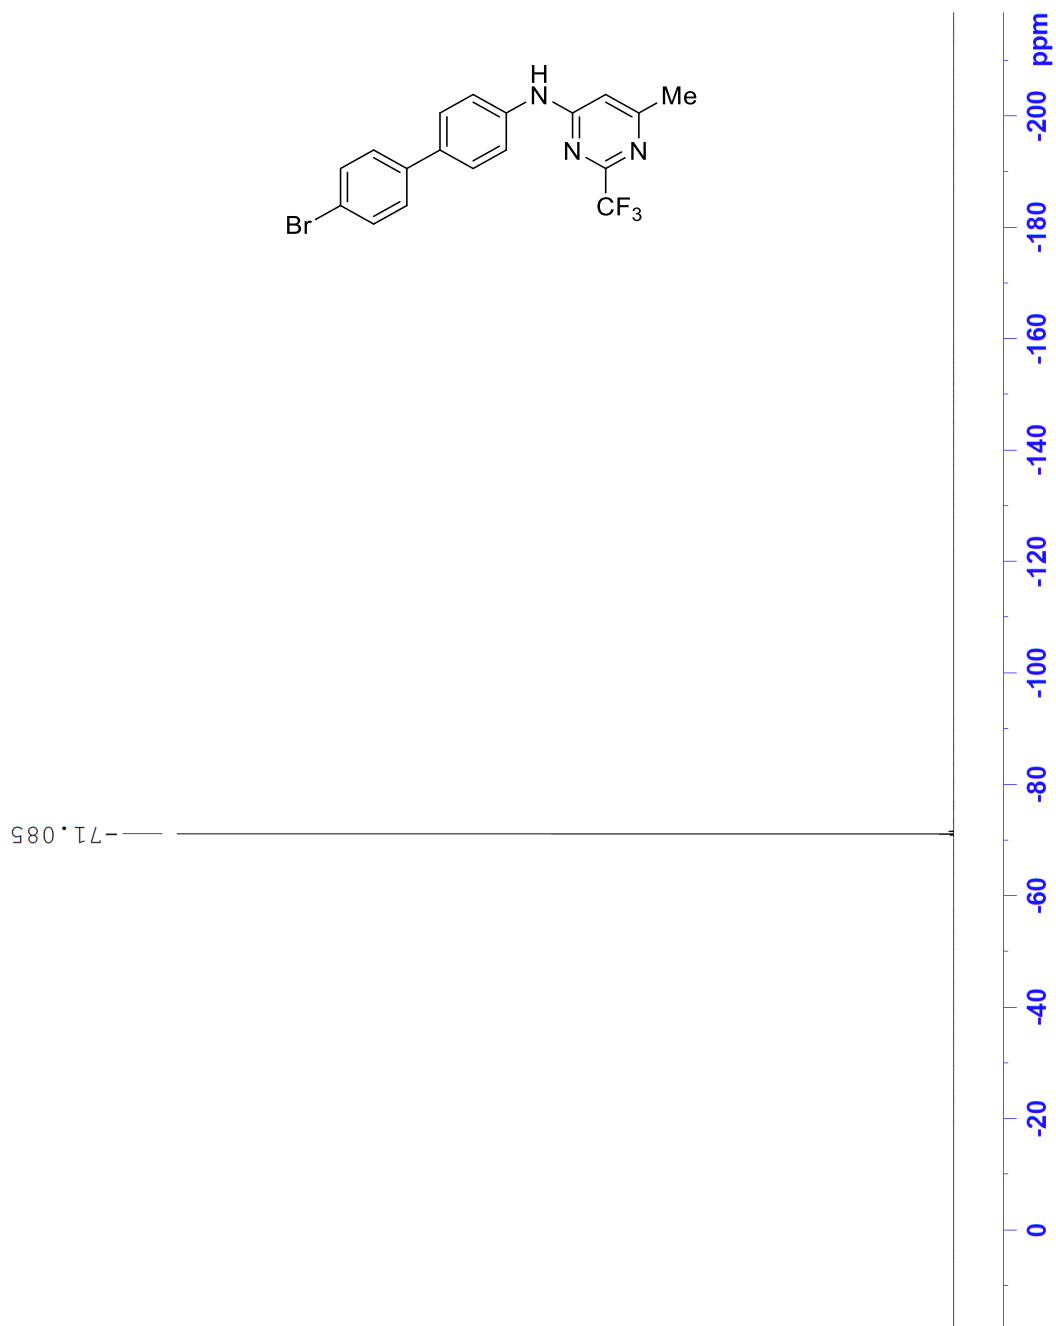

**<sup>1</sup>H NMR (400 MHz, CDCl<sub>3</sub>) of 6-Methyl-N-(naphthalen-1-yl)-2-(trifluoromethyl)pyrimidin-4-amine (3n)**

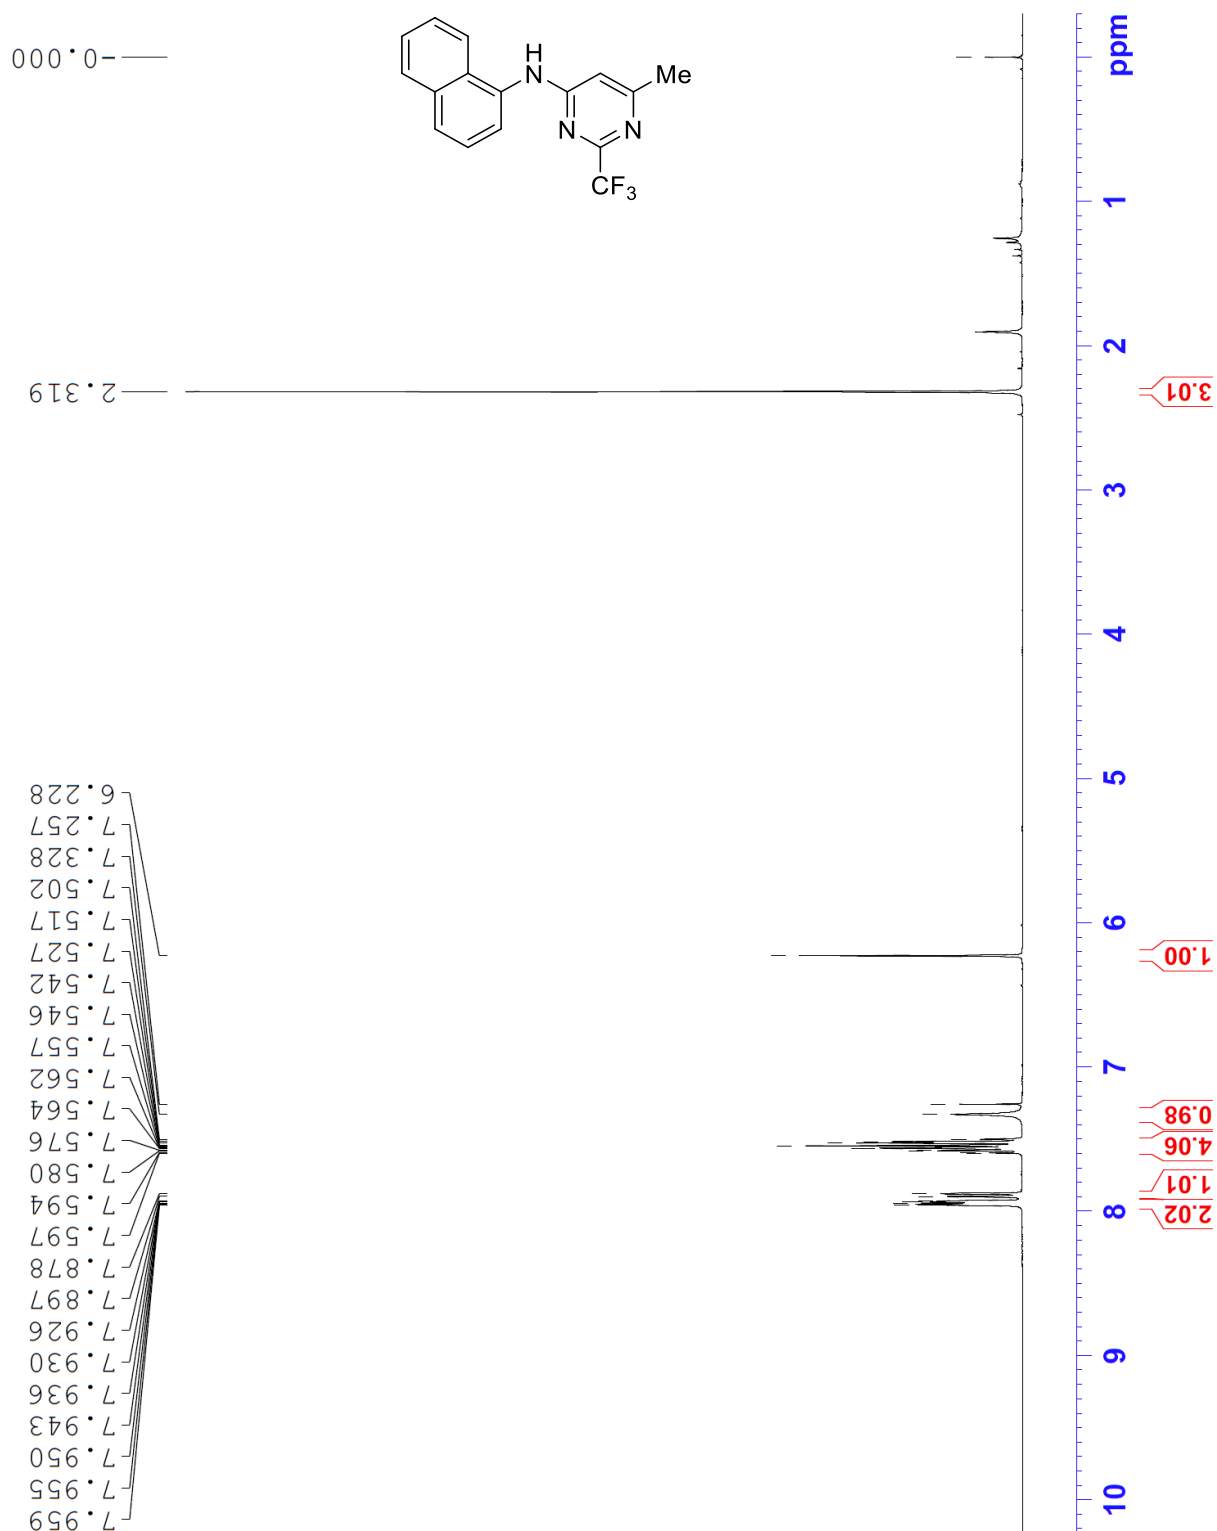

**<sup>13</sup>C NMR (100.6 MHz, CDCl<sub>3</sub>) of 6-Methyl-N-(naphthalen-1-yl)-2-(trifluoromethyl)pyrimidin-4-amine (3n)**

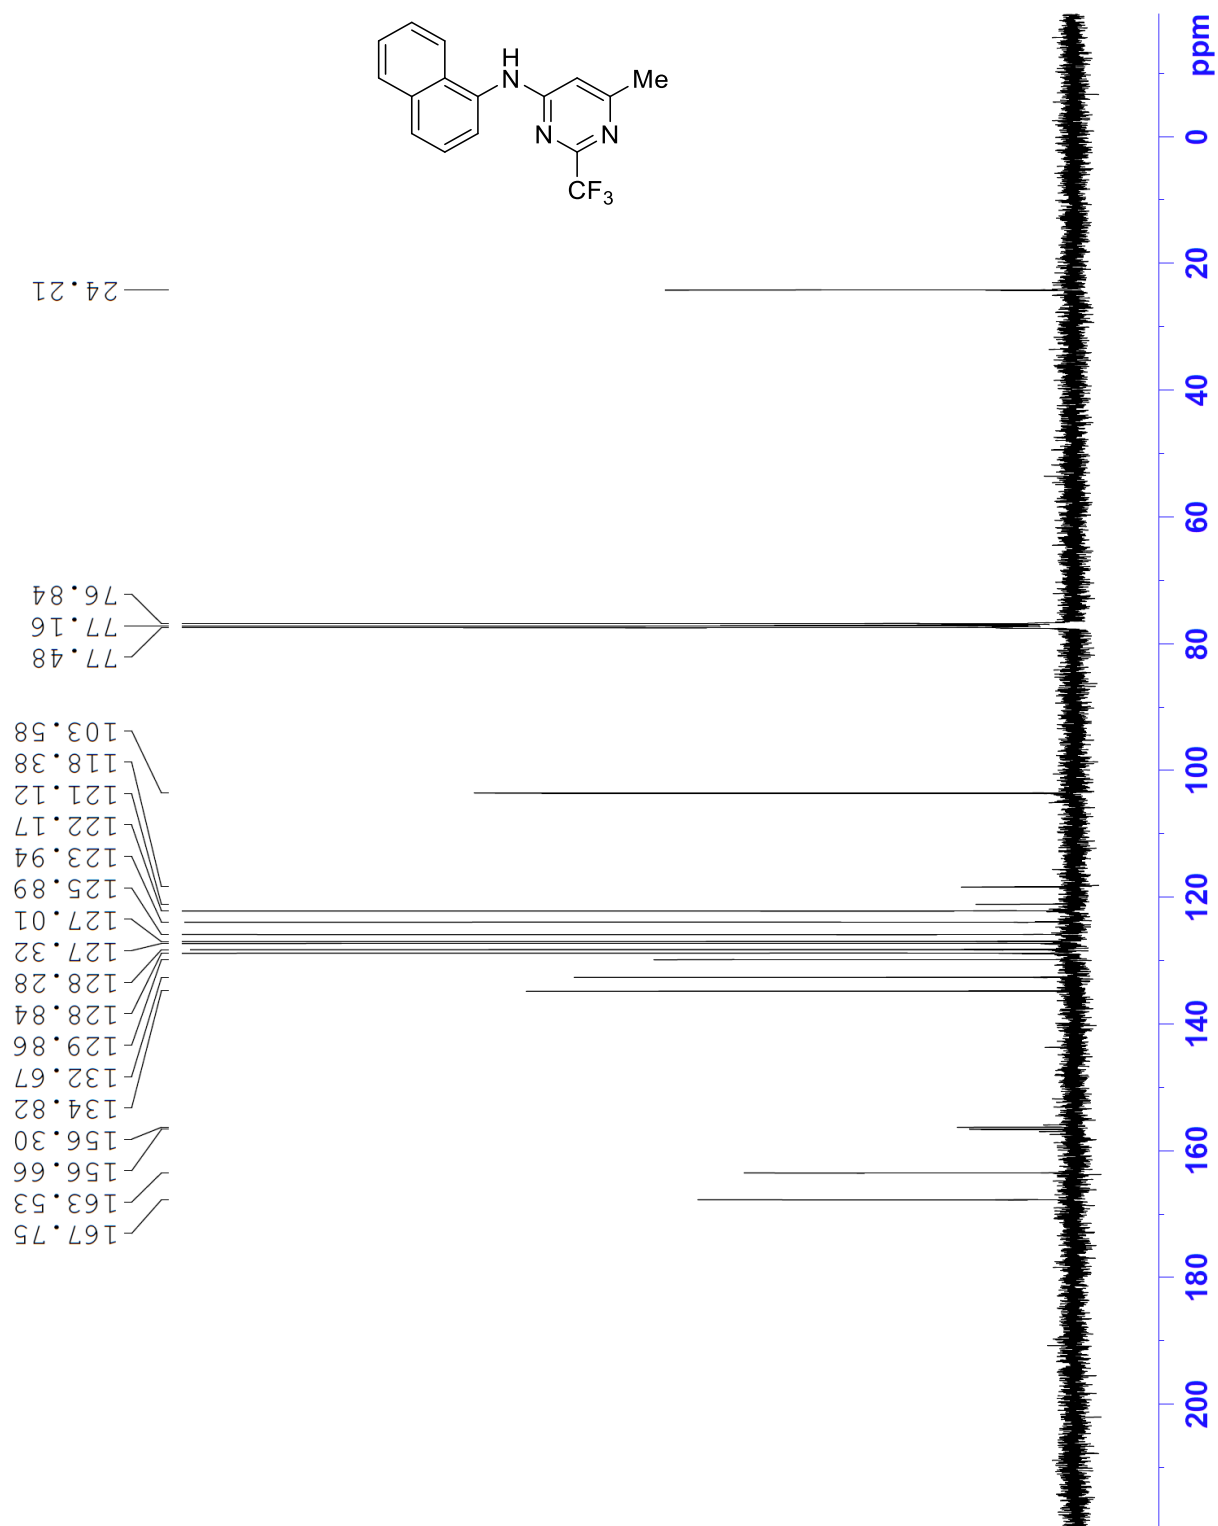

**<sup>19</sup>F NMR (376 MHz, CDCl<sub>3</sub>) of 6-Methyl-N-(naphthalen-1-yl)-2-(trifluoromethyl)pyrimidin-4-amine (3n)**

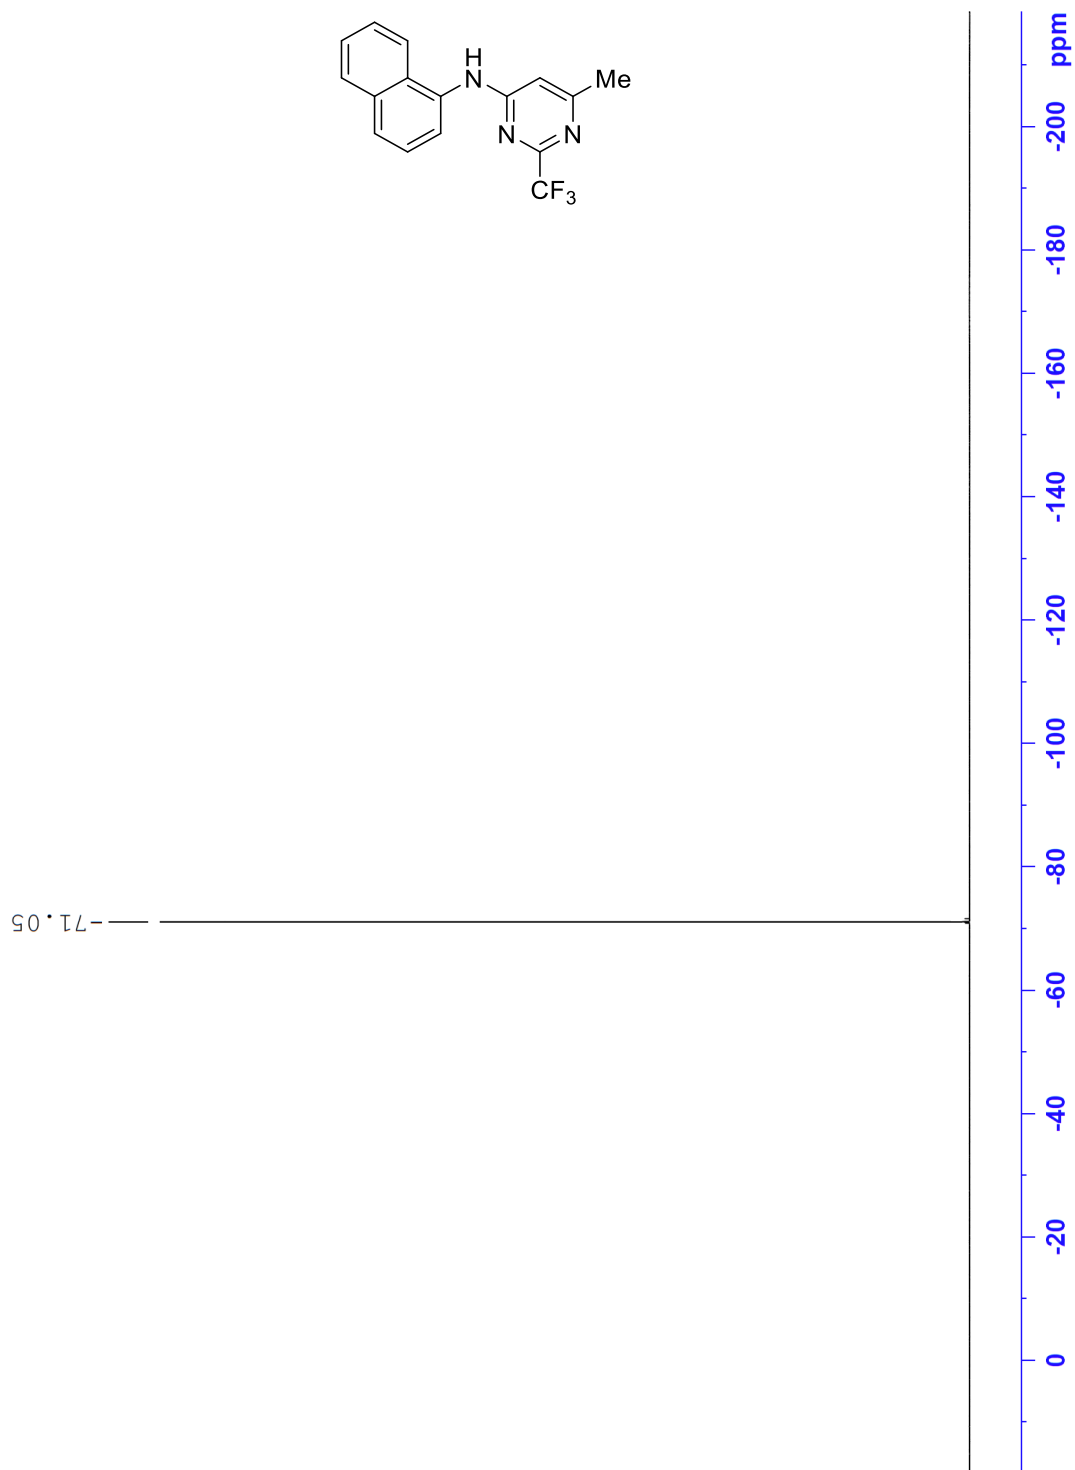



**<sup>1</sup>H NMR (400 MHz, CDCl<sub>3</sub>) of 6-Methyl-N-(naphthalen-2-yl)-2-(trifluoromethyl)pyrimidin-4-amine (3o)**

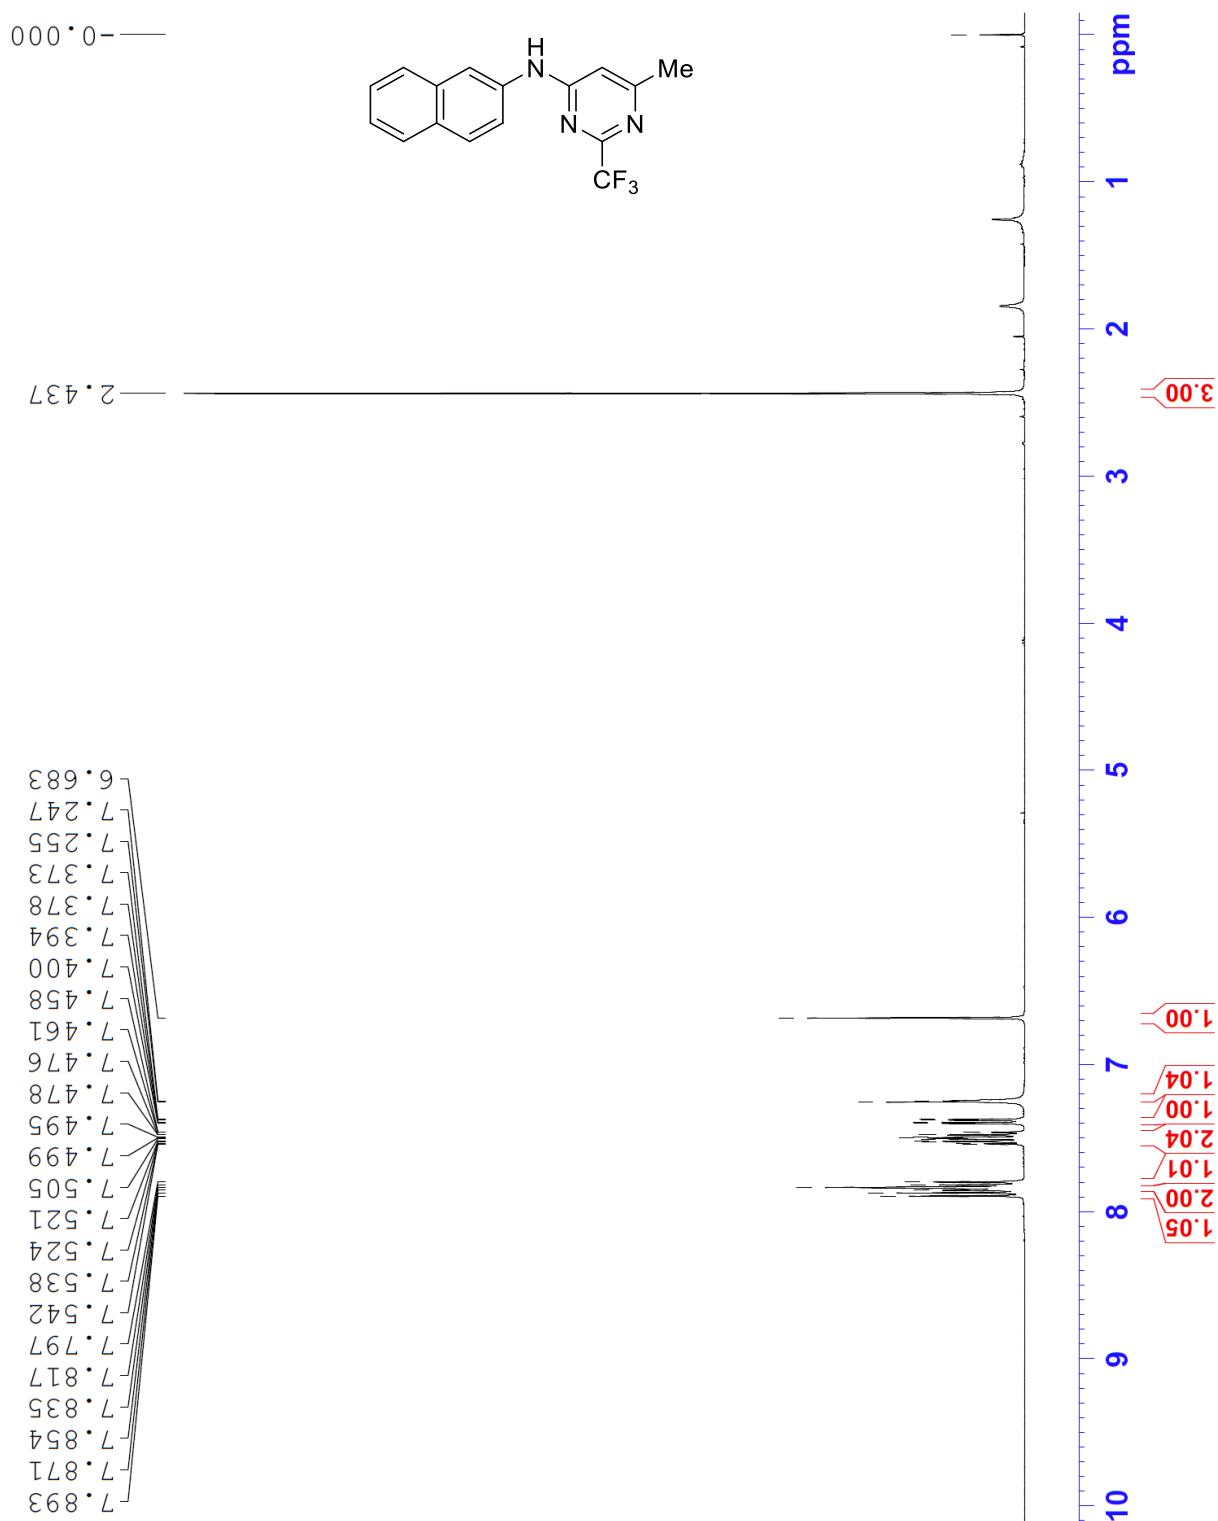

**<sup>13</sup>C NMR (100.6 MHz, CDCl<sub>3</sub>) of 6-Methyl-N-(naphthalen-2-yl)-2-(trifluoromethyl)pyrimidin-4-amine (3o)**

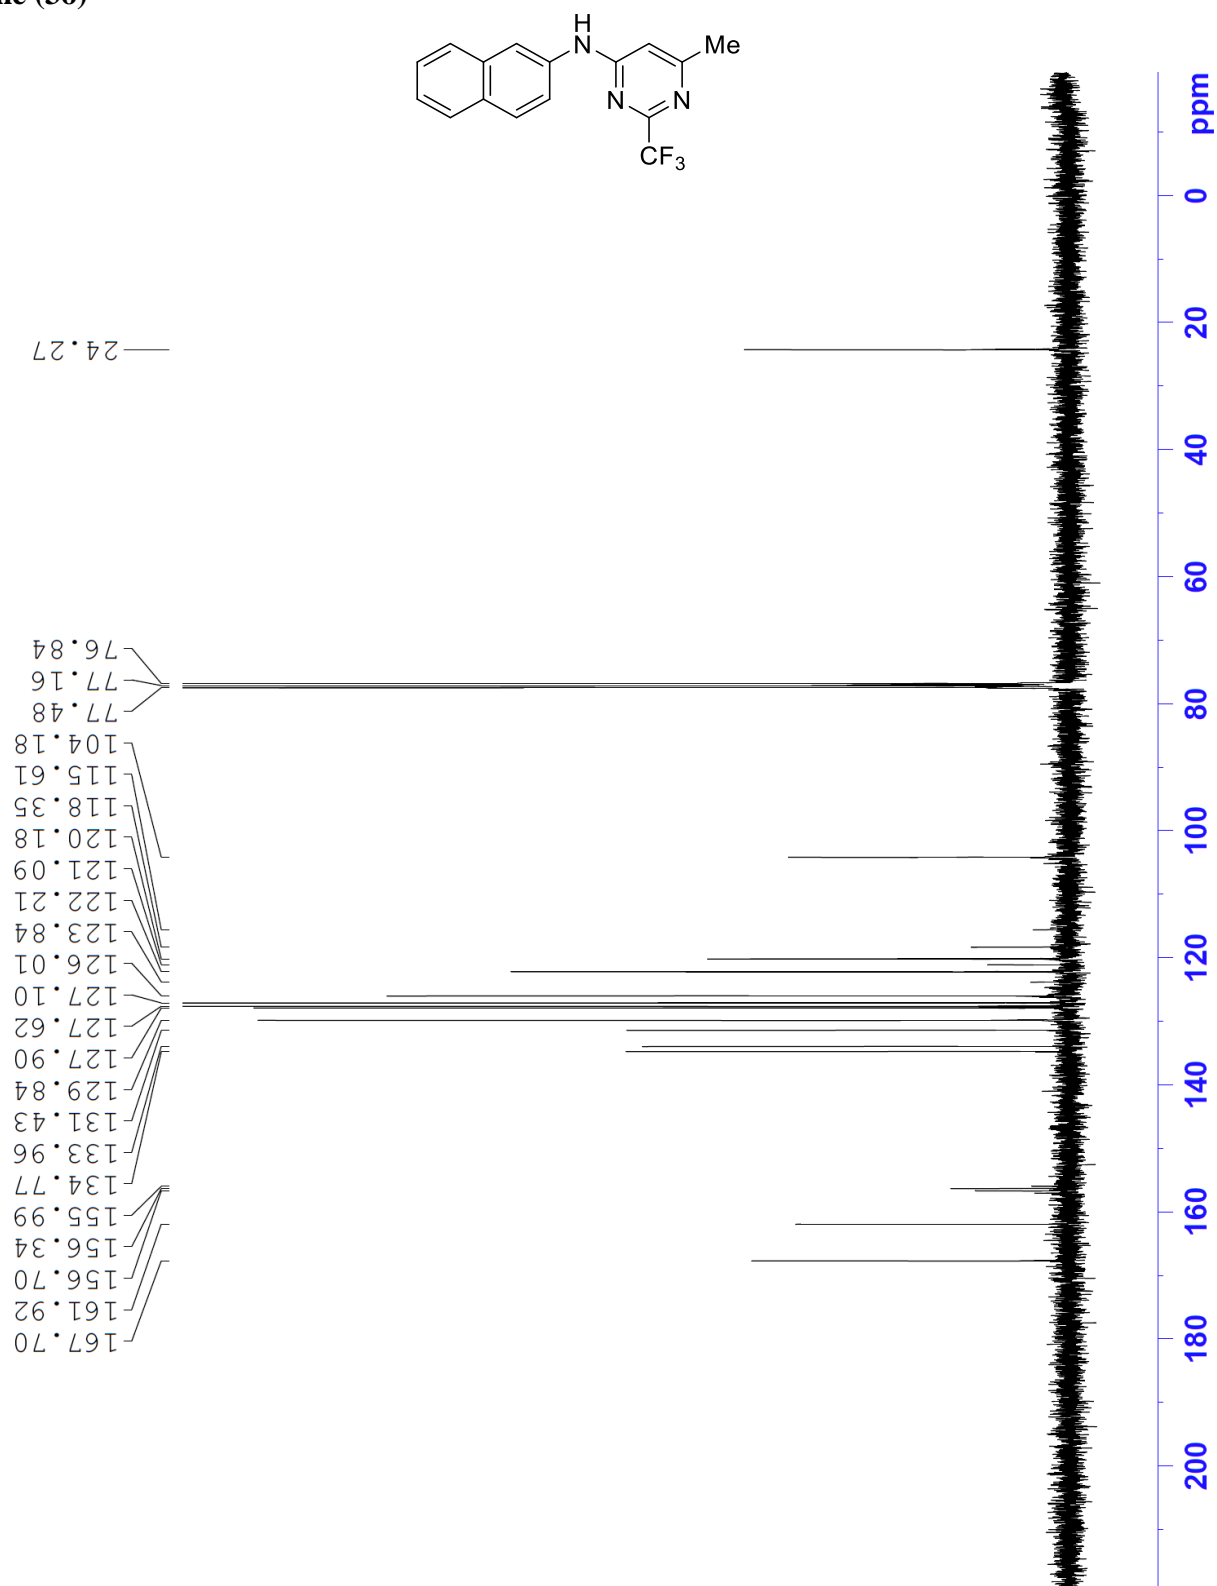

**<sup>19</sup>F NMR (376 MHz, CDCl<sub>3</sub>) of 6-Methyl-N-(naphthalen-2-yl)-2-(trifluoromethyl)pyrimidin-4-amine (3o)**

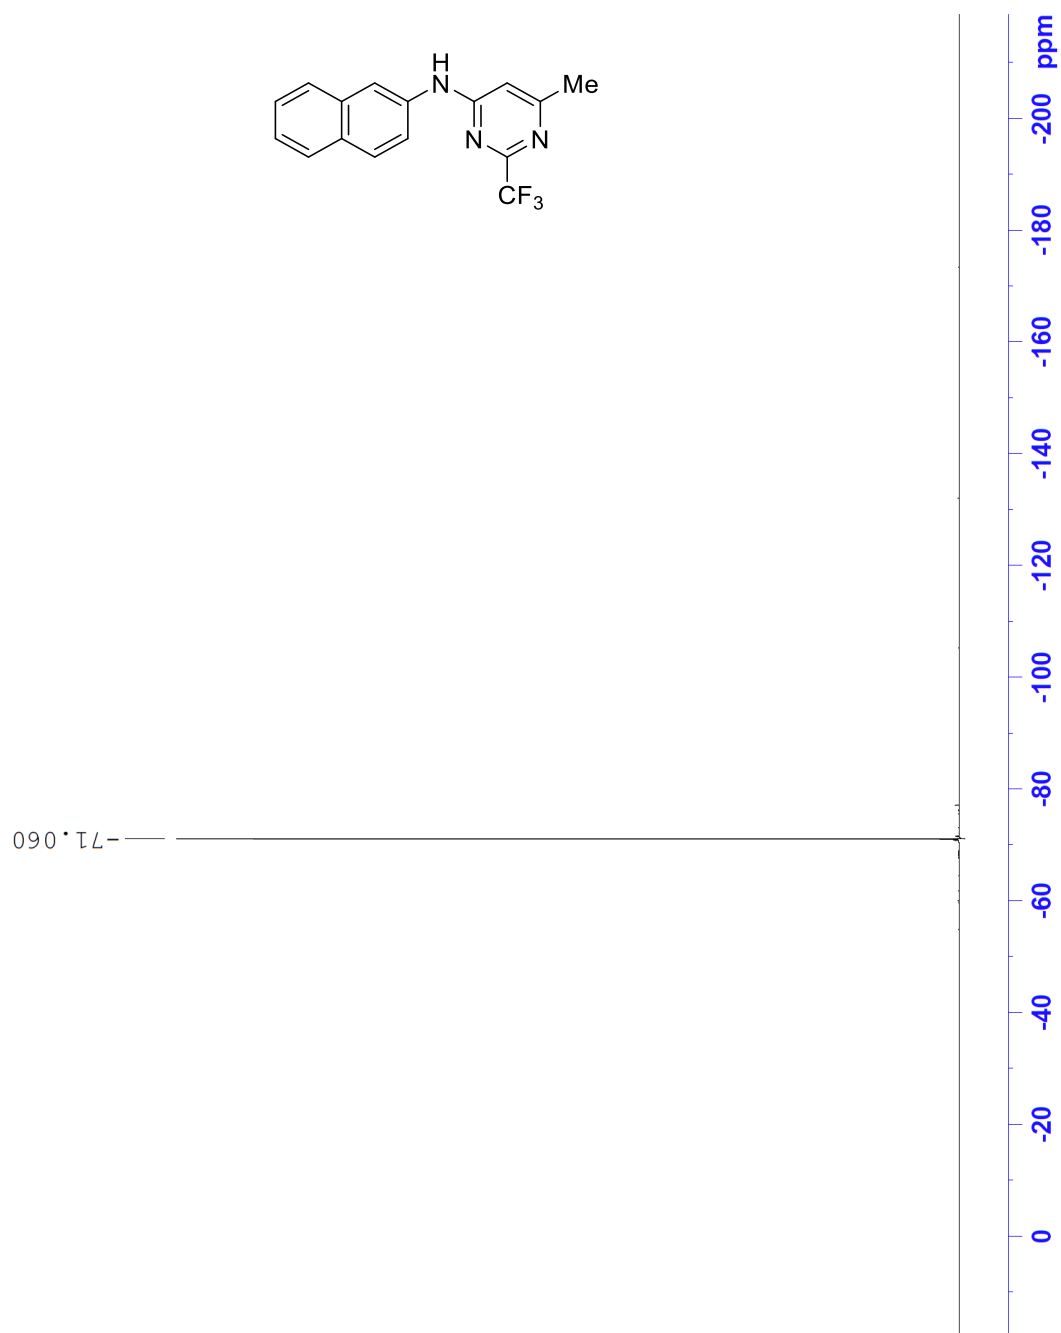

<sup>1</sup>H NMR (600 MHz, CDCl<sub>3</sub>) of *N*-(6-Methyl-2-(trifluoromethyl)pyrimidin-4-yl)-1*H*-indol-4-amine

(3p)

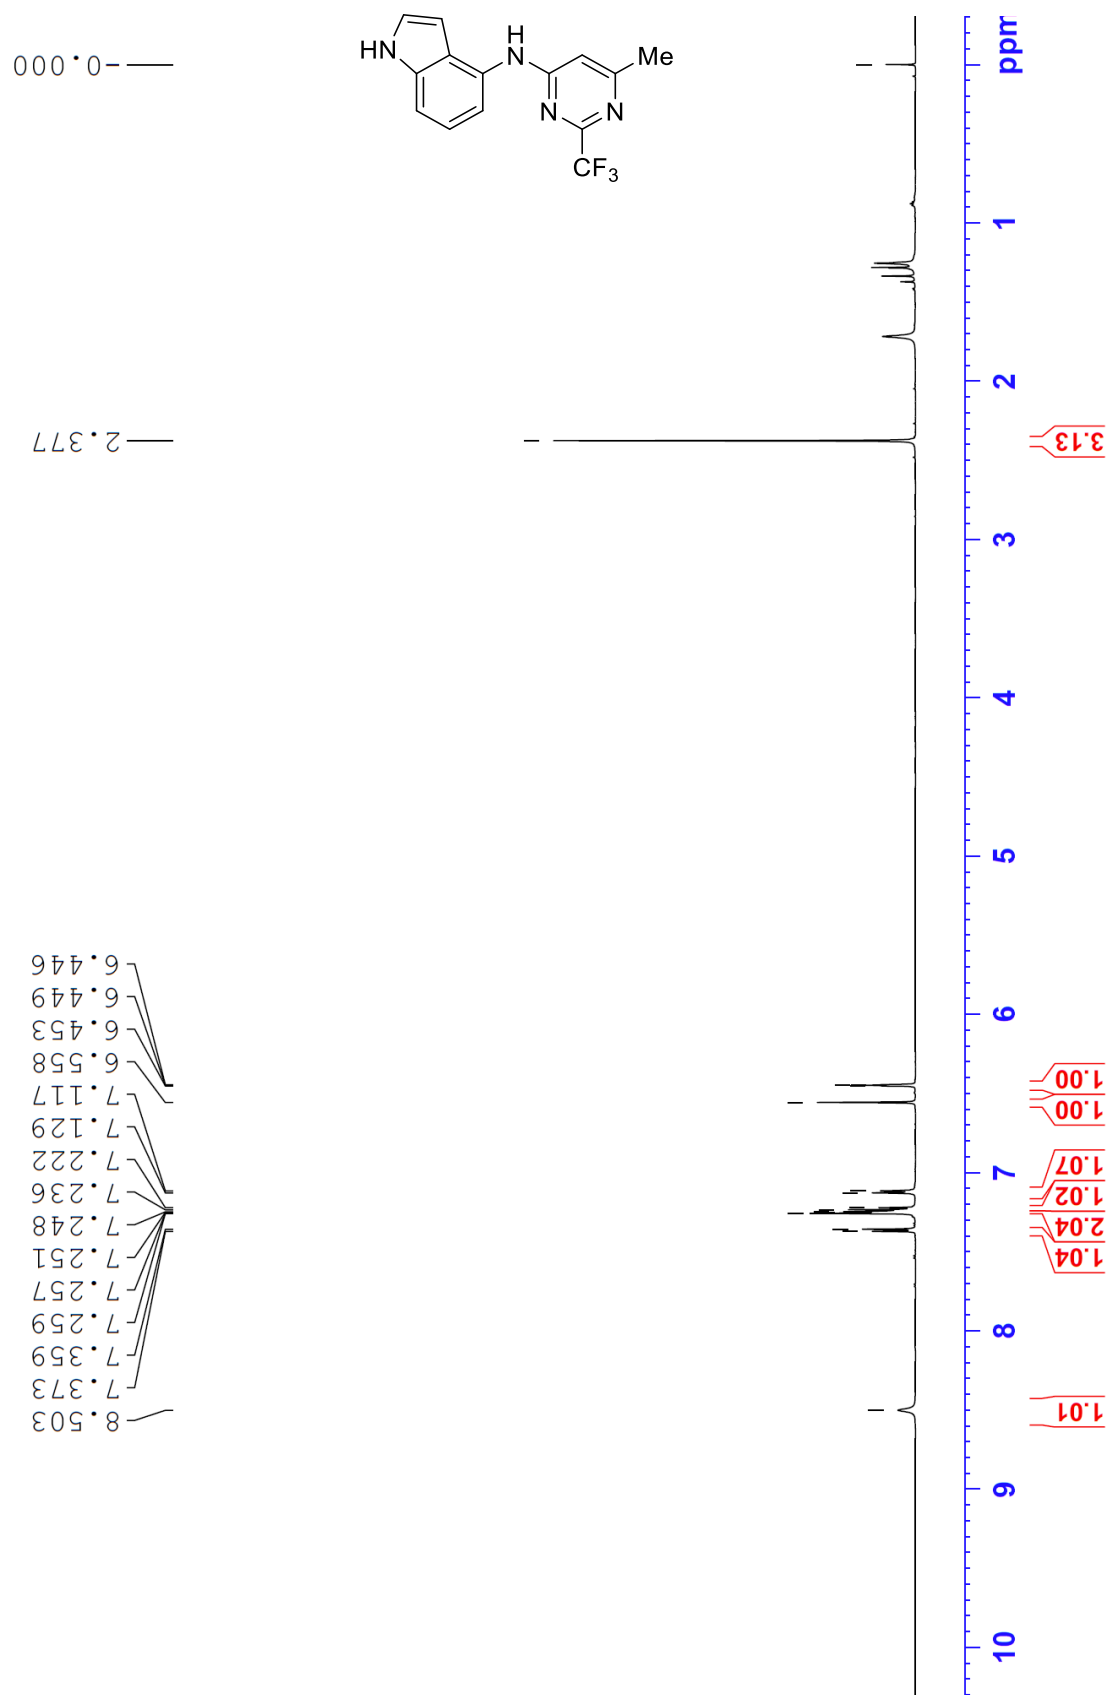

**<sup>13</sup>C NMR (100.6 MHz, CDCl<sub>3</sub>) of *N*-(6-Methyl-2-(trifluoromethyl)pyrimidin-4-yl)-1*H*-indol-4-amine (3p)**

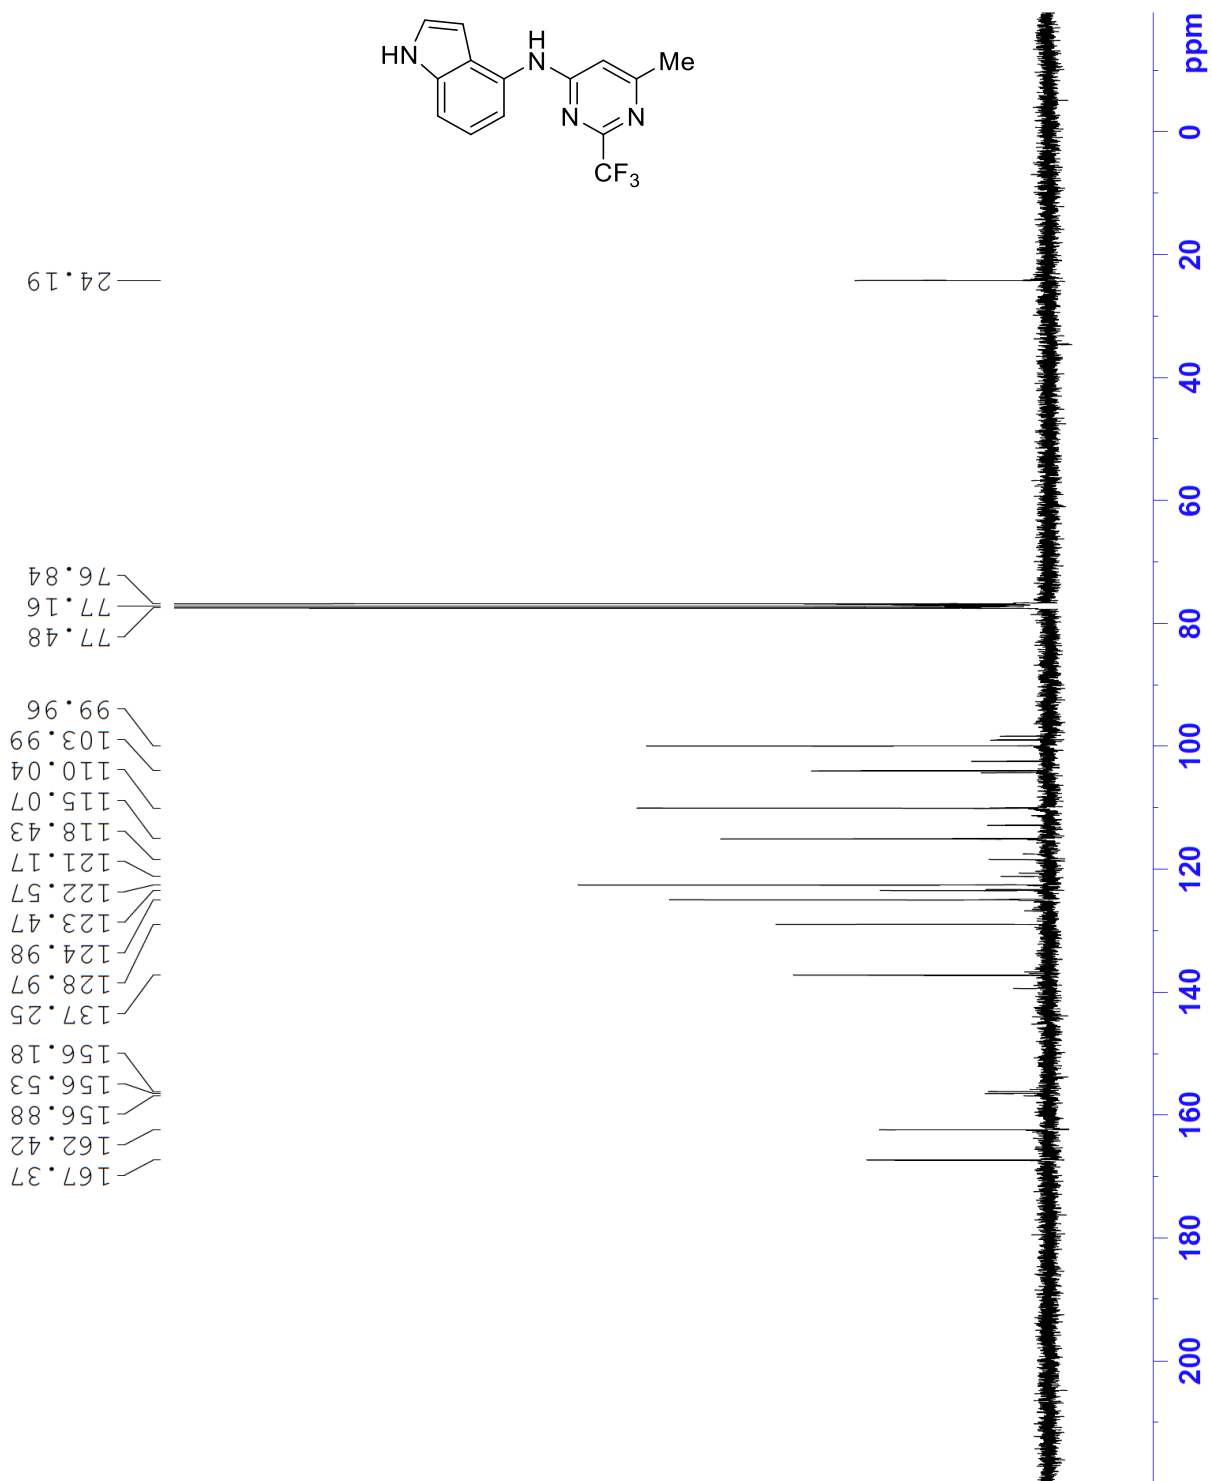

**<sup>19</sup>F NMR (565 MHz, CDCl<sub>3</sub>) of *N*-(6-Methyl-2-(trifluoromethyl)pyrimidin-4-yl)-1*H*-indol-4-amine  
(3p)**

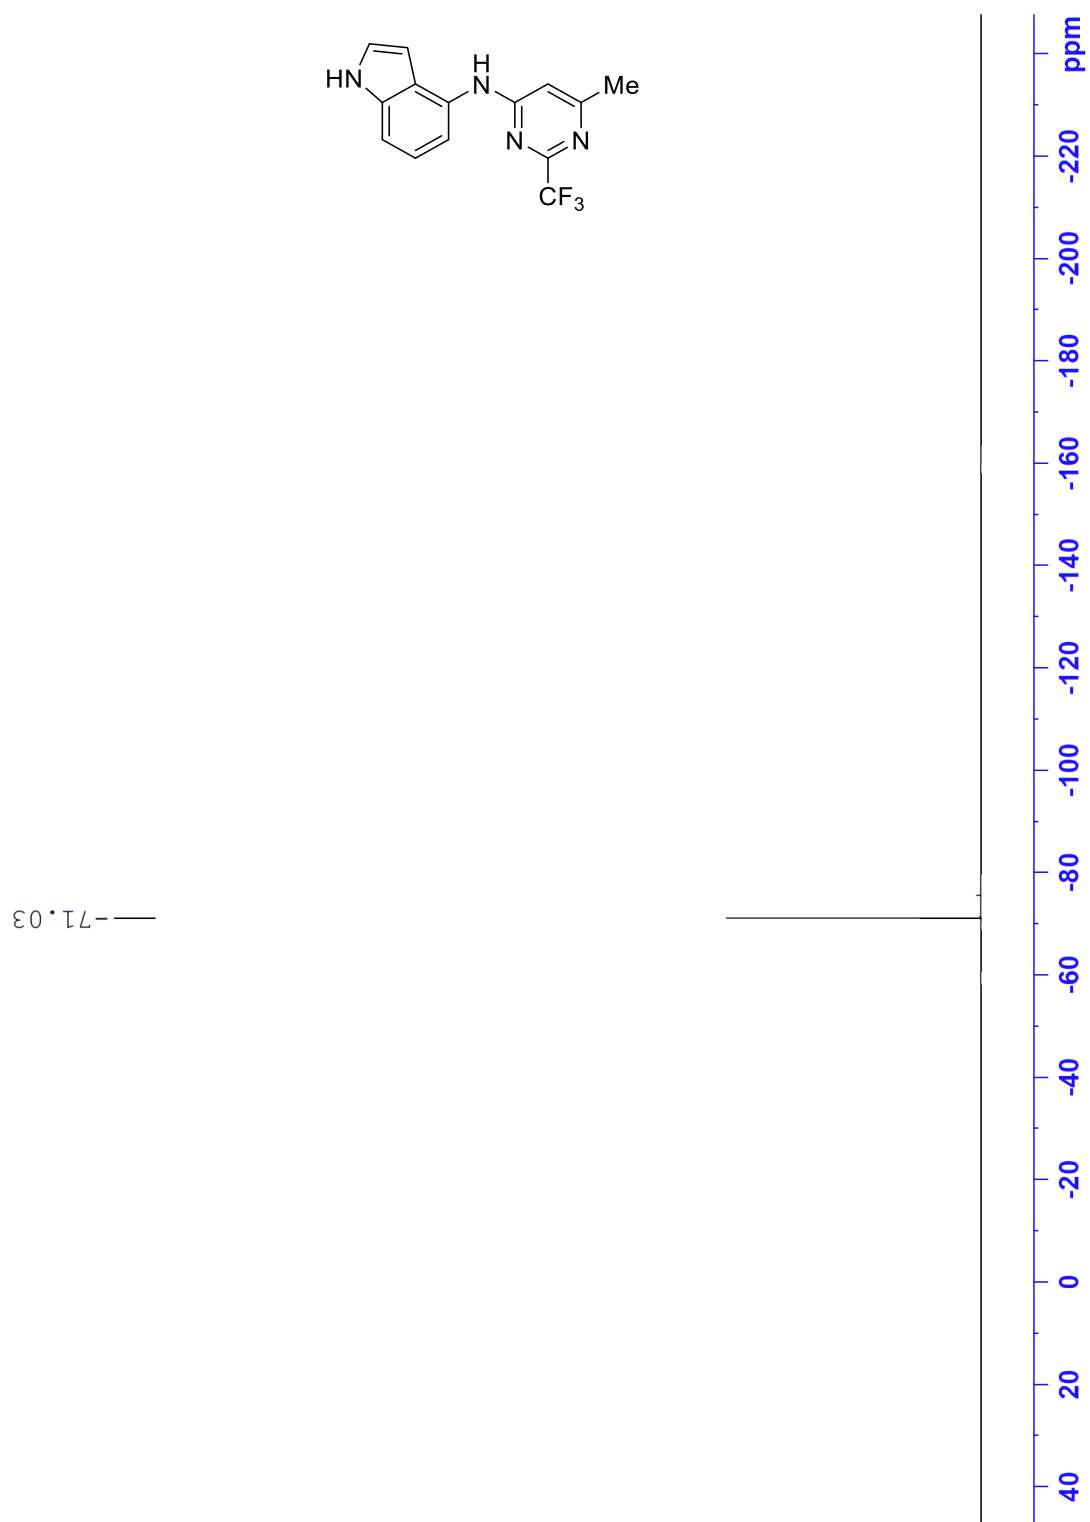

**<sup>1</sup>H NMR (400 MHz, CDCl<sub>3</sub>) of 9-Ethyl-N-(6-methyl-2-(trifluoromethyl)pyrimidin-4-yl)-9H-carbazol-3-amine (3q)**

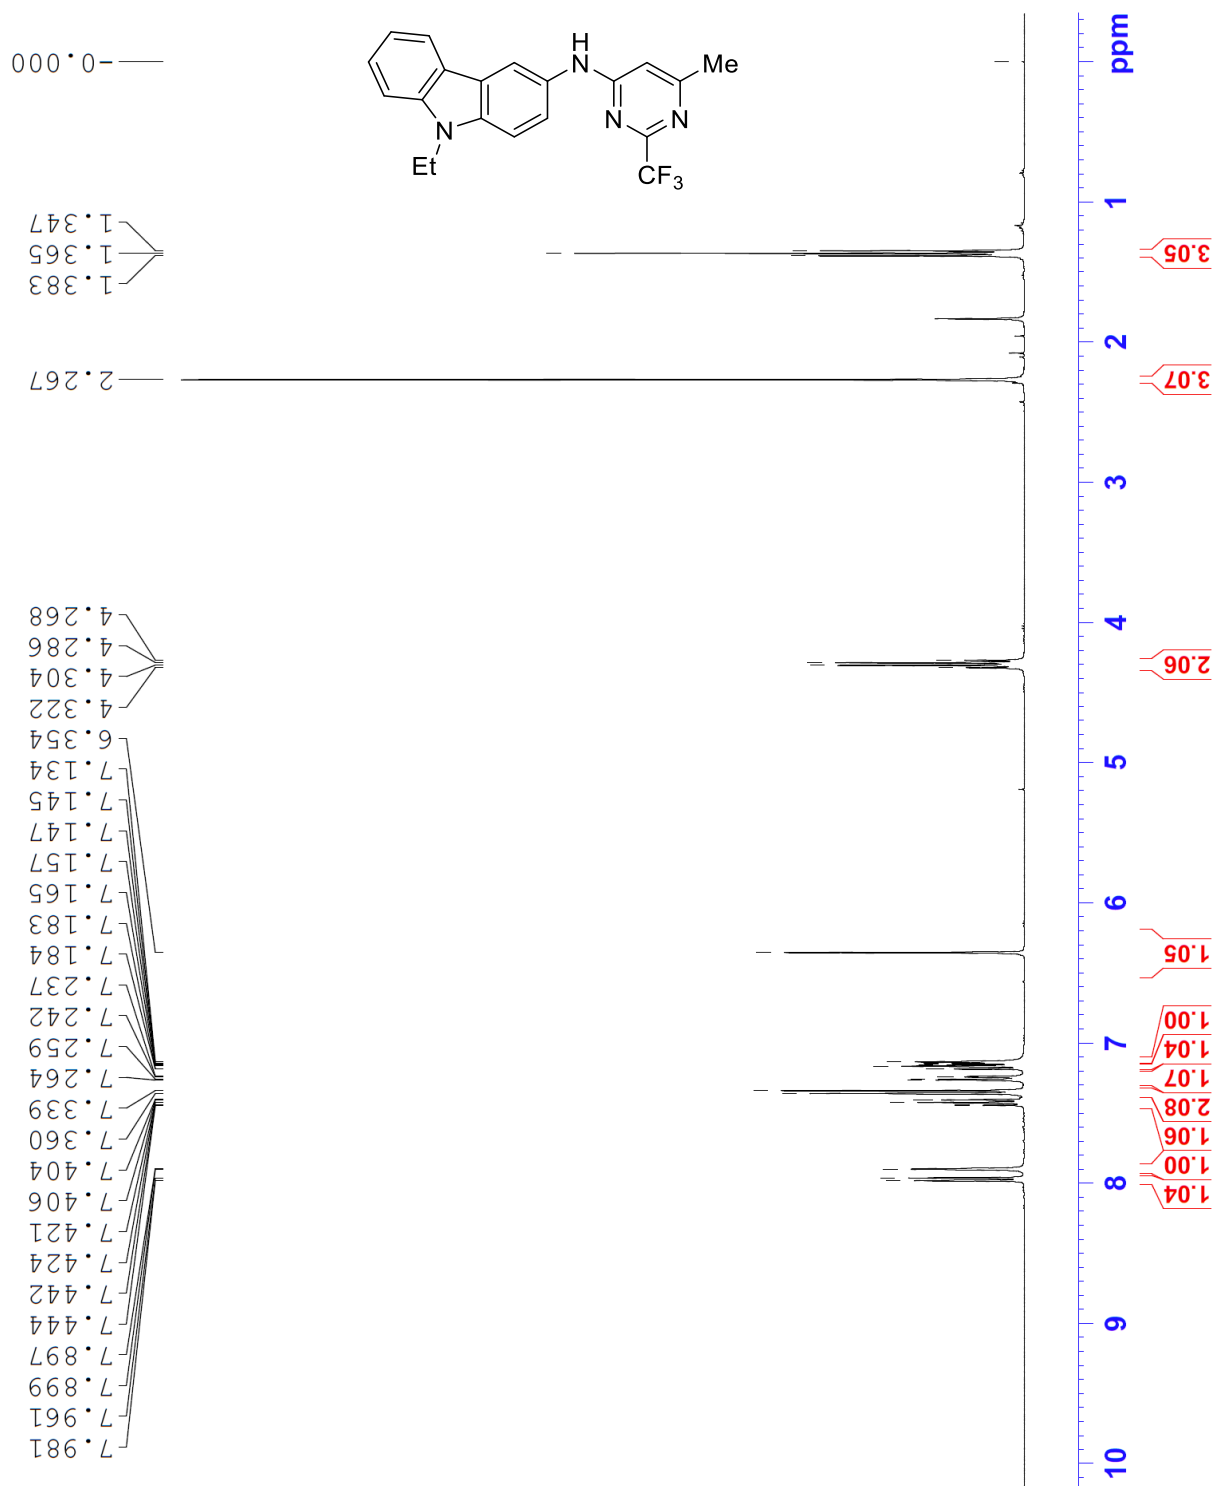

<sup>13</sup>C NMR (100.6 MHz, CDCl<sub>3</sub>) of 9-Ethyl-N-(6-methyl-2-(trifluoromethyl)pyrimidin-4-yl)-9H-carbazol-3-amine (3q)

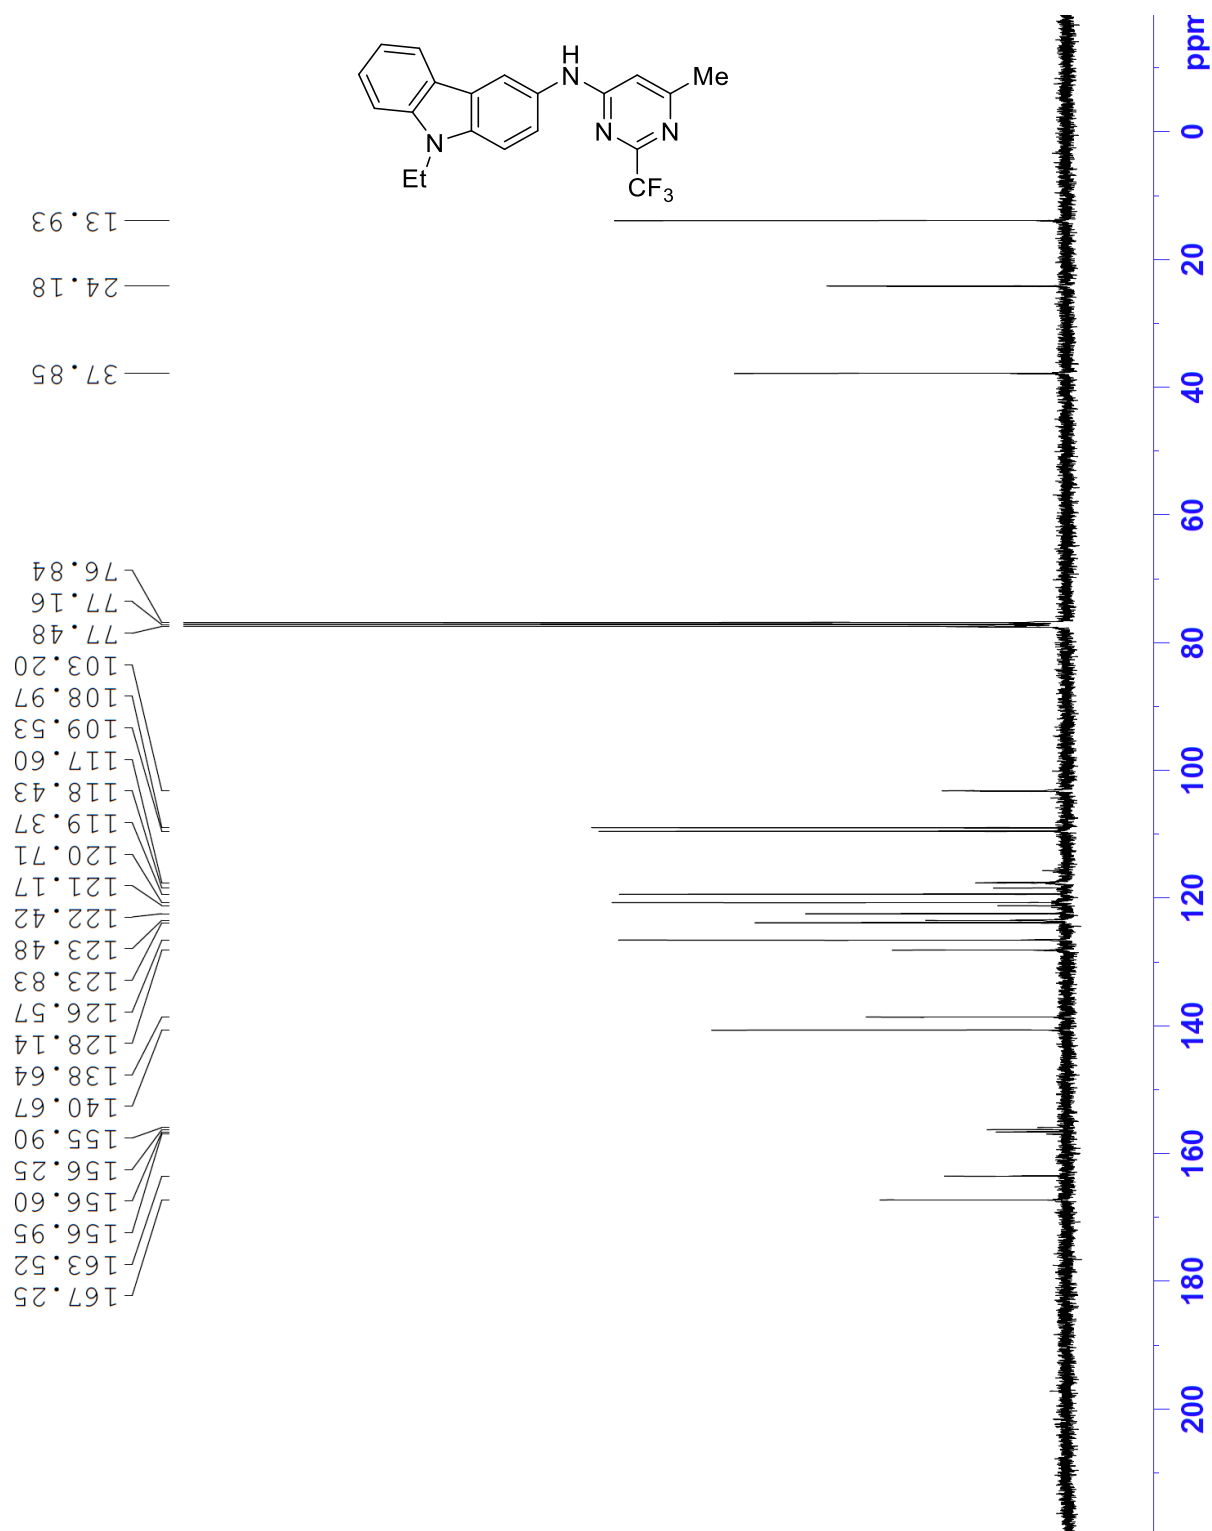



**<sup>19</sup>F NMR (376 MHz, CDCl<sub>3</sub>) of 9-Ethyl-N-(6-methyl-2-(trifluoromethyl)pyrimidin-4-yl)-9H-carbazol-3-amine (3q)**

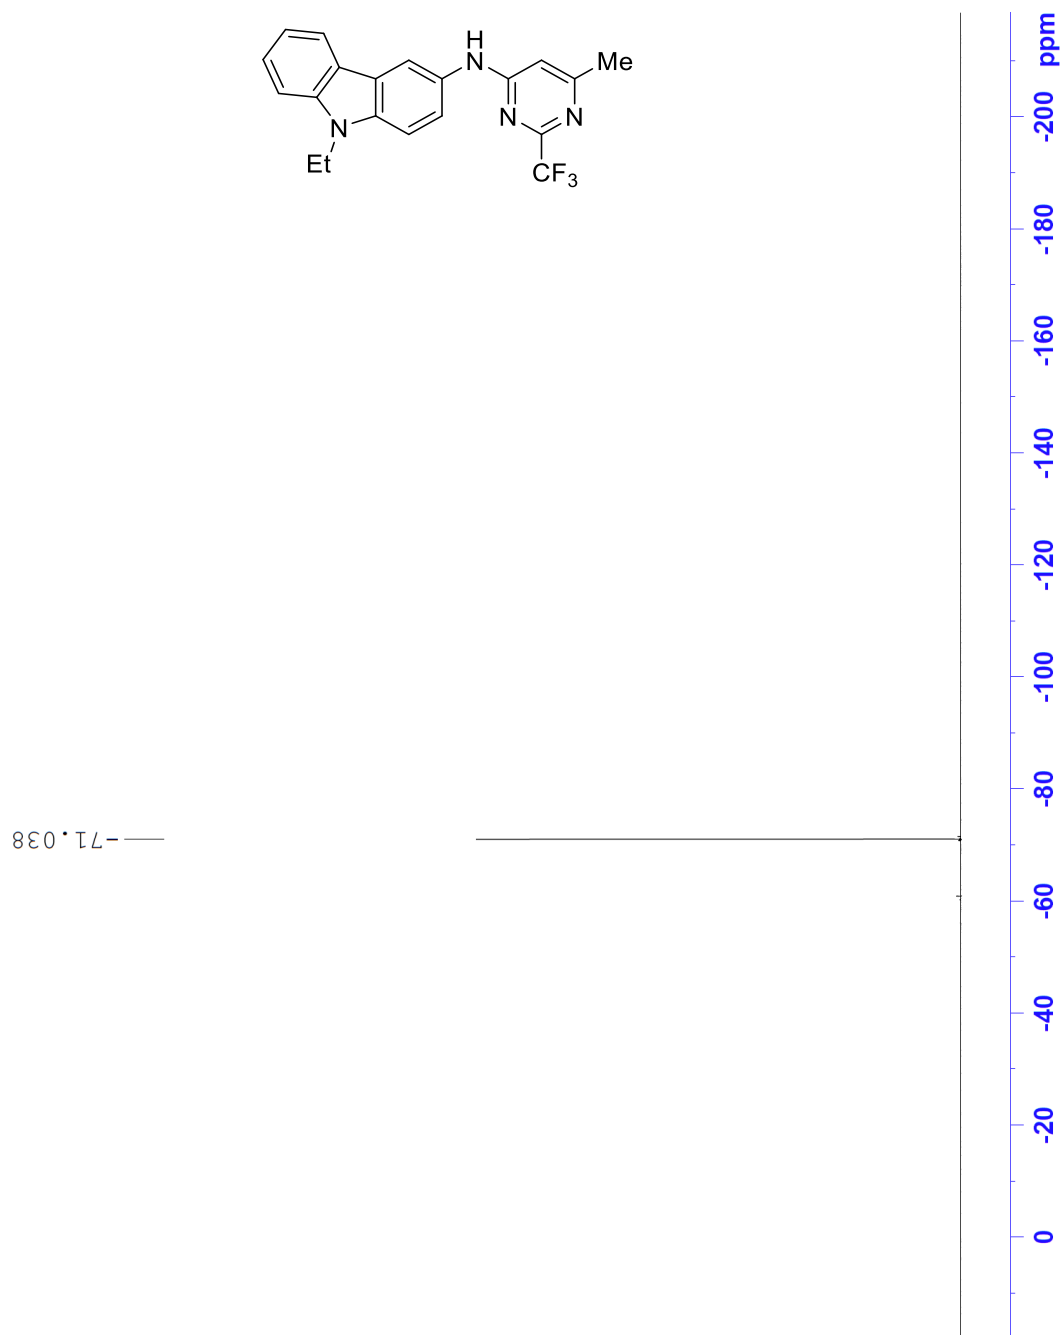

**<sup>1</sup>H NMR (400 MHz, CDCl<sub>3</sub>) of *N*-(Dibenzo[*b,d*]furan-3-yl)-6-methyl-2-(trifluoromethyl)pyrimidin-4-amine (3r)**

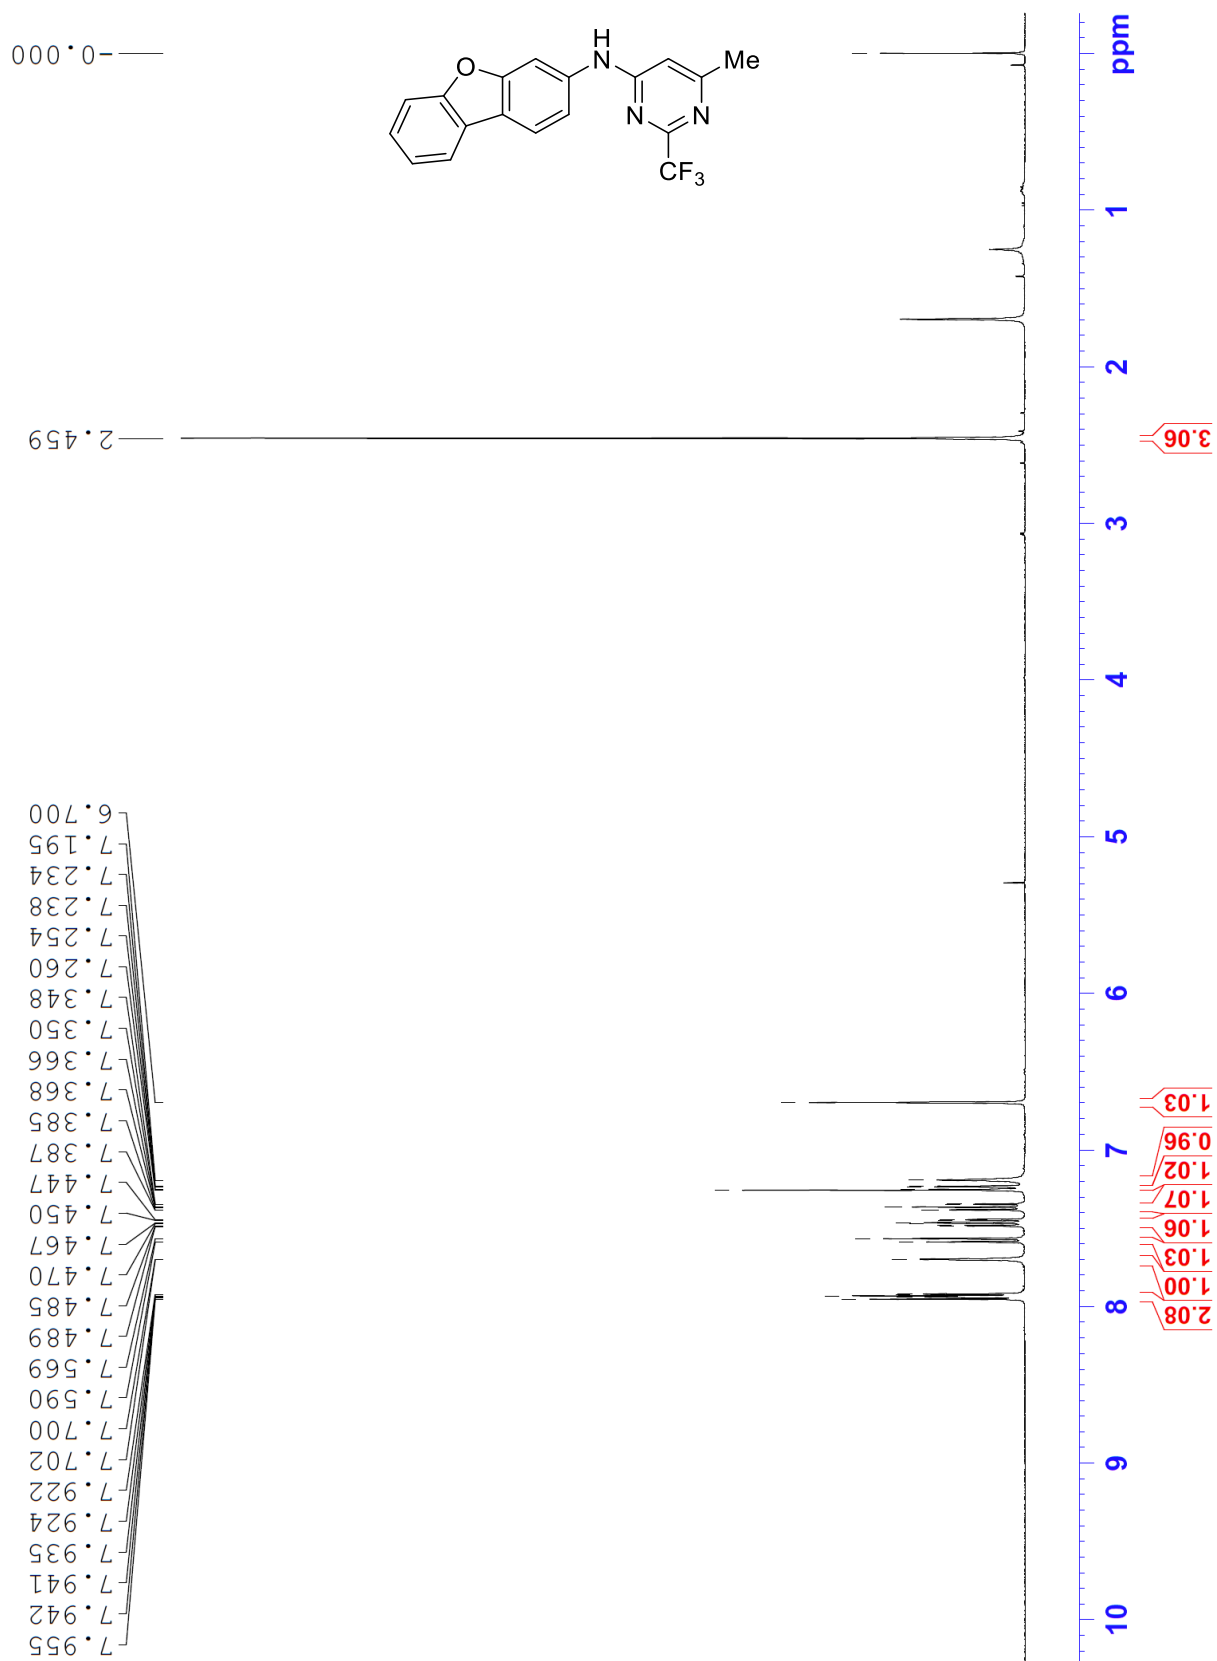

<sup>13</sup>C NMR (100.6 MHz, CDCl<sub>3</sub>) of *N*-(Dibenzo[*b,d*]furan-3-yl)-6-methyl-2-(trifluoromethyl)pyrimidin-4-amine (3r)

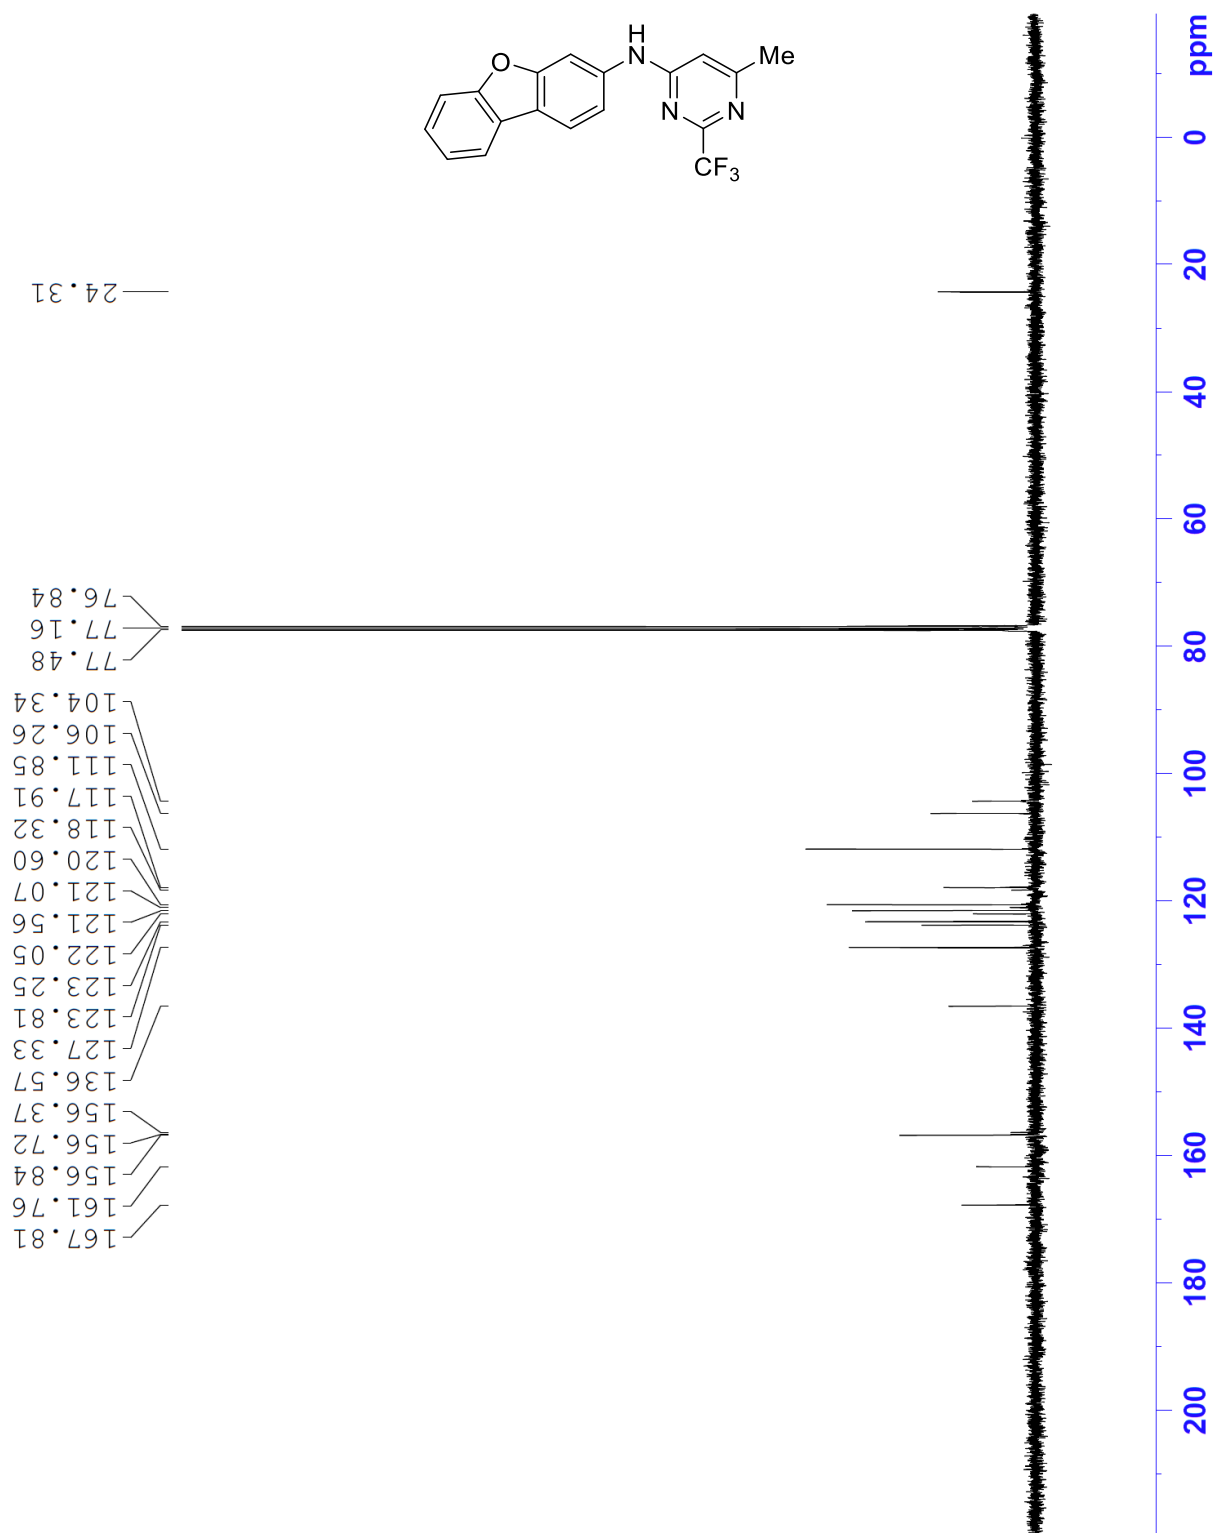

**<sup>19</sup>F NMR (376 MHz, CDCl<sub>3</sub>) of *N*-(Dibenzo[*b,d*]furan-3-yl)-6-methyl-2-(trifluoromethyl)pyrimidin-4-amine (3r)**

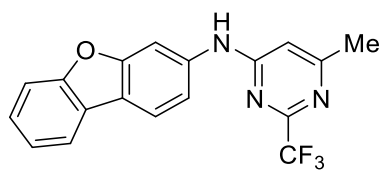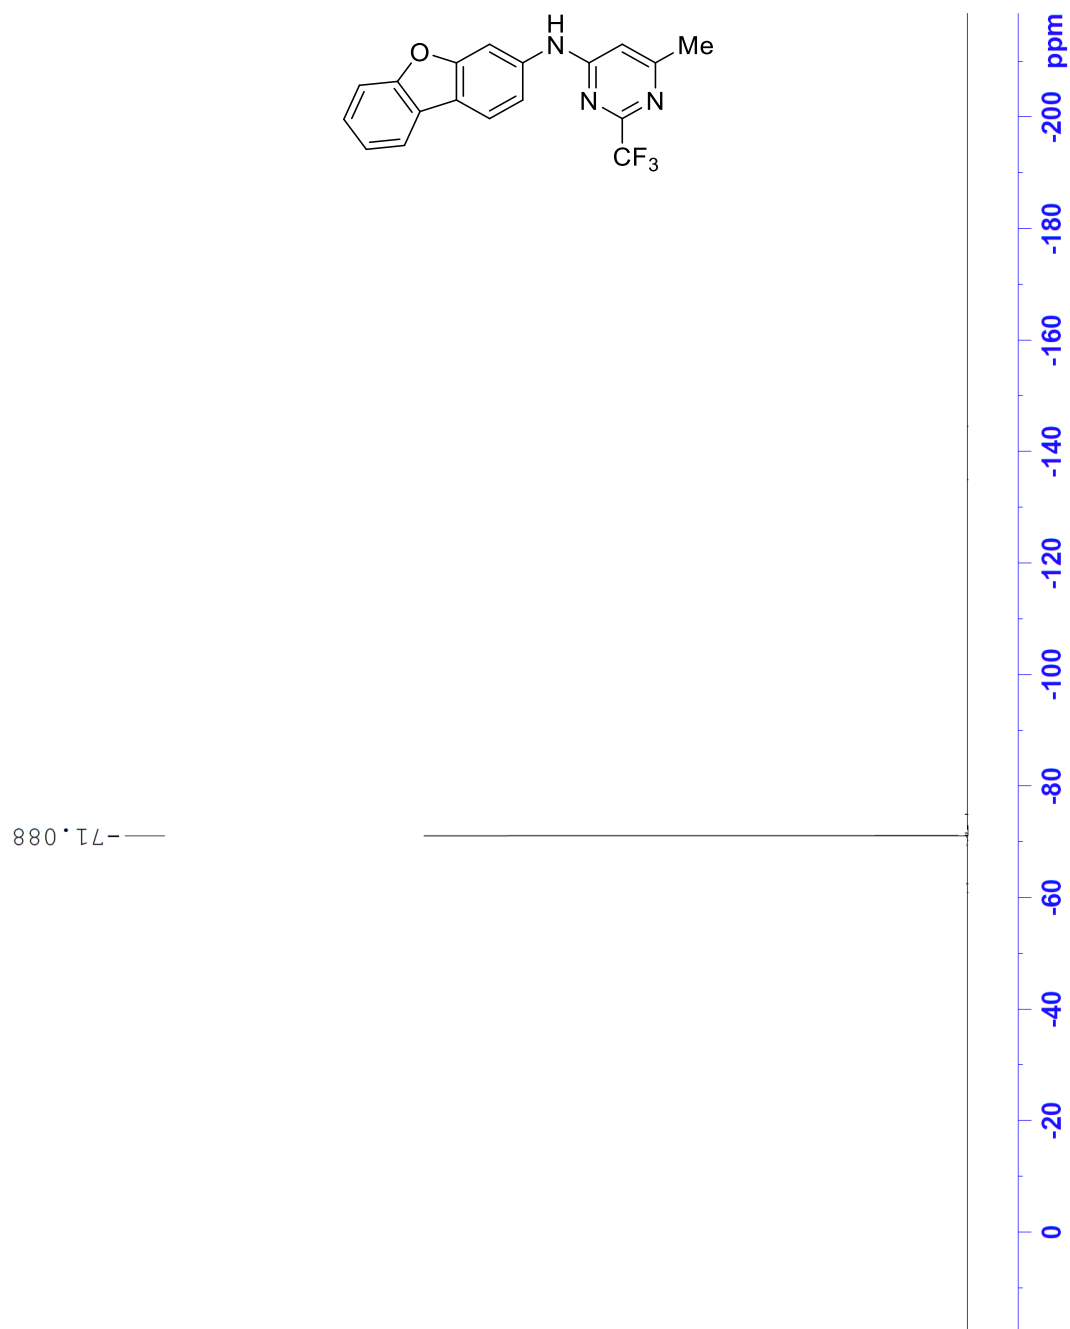

**<sup>1</sup>H NMR (400 MHz, CDCl<sub>3</sub>) of 6-Methyl-N-(*p*-tolyl)-2-(trifluoromethyl)pyrimidin-4-amine (3s)**

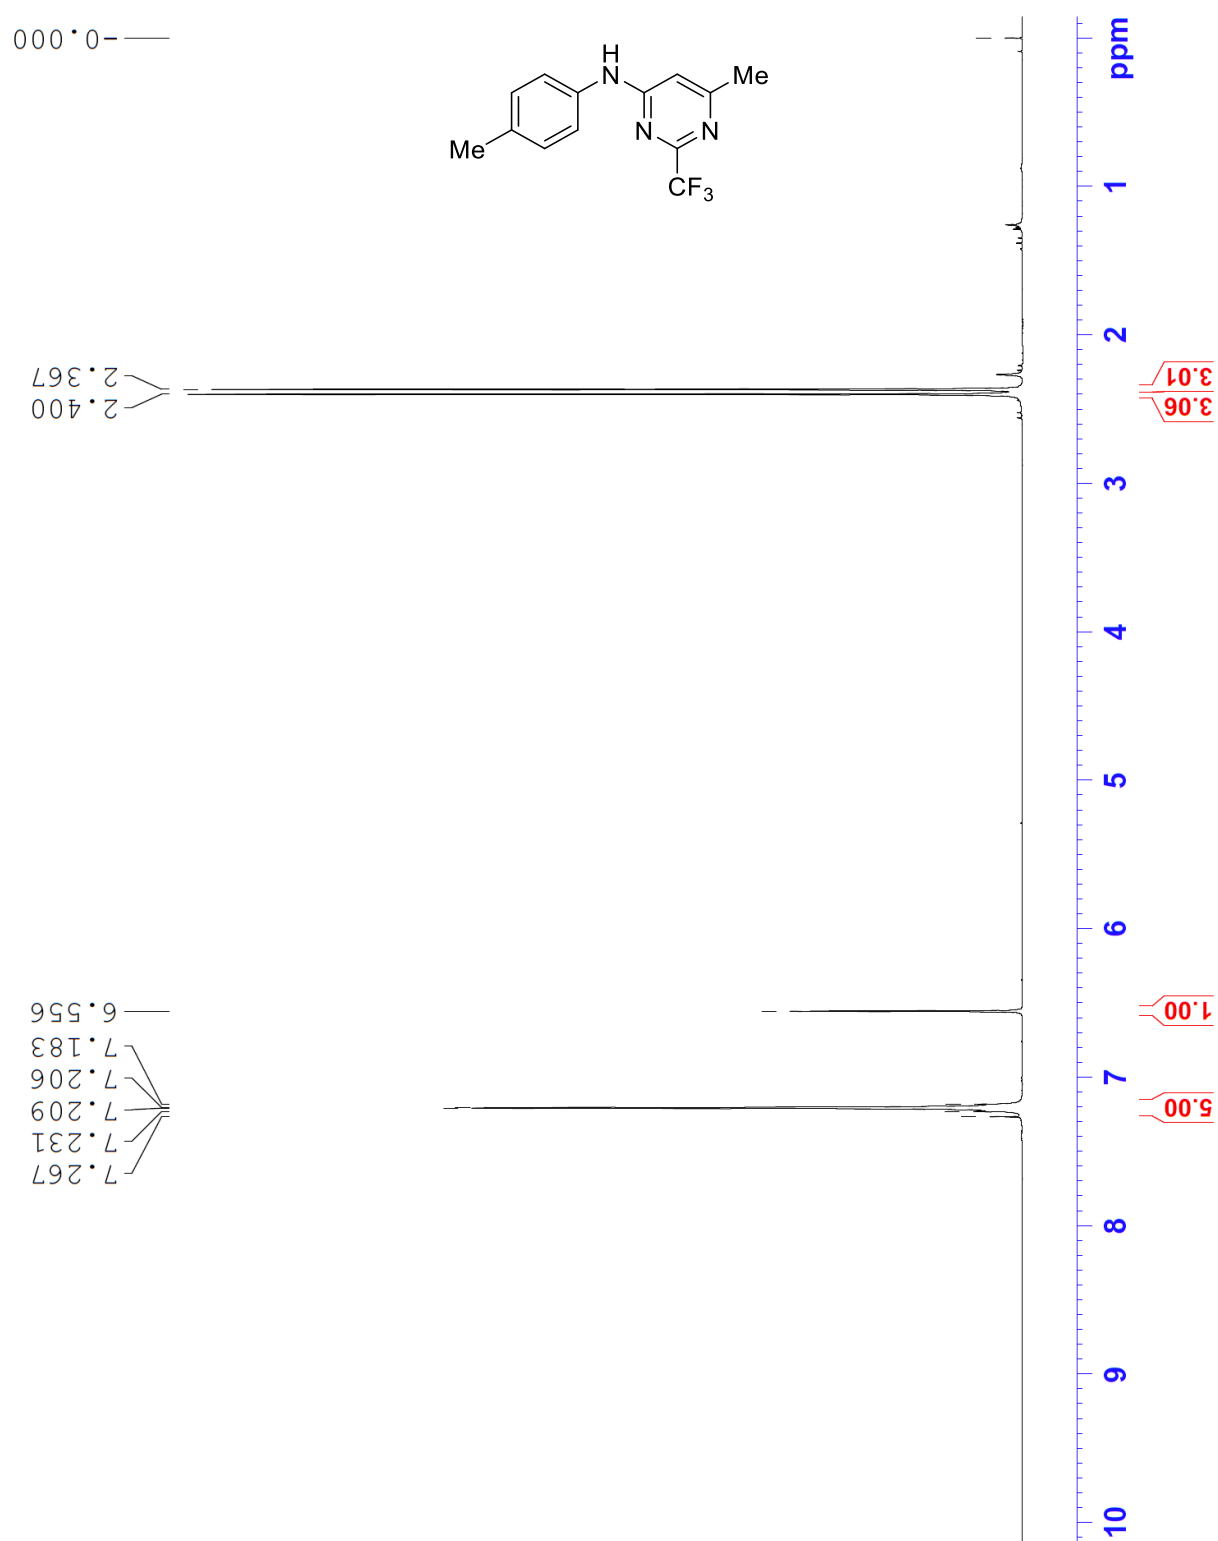

<sup>13</sup>C NMR (100.6 MHz, CDCl<sub>3</sub>) of 6-Methyl-N-(*p*-tolyl)-2-(trifluoromethyl)pyrimidin-4-amine (3s)

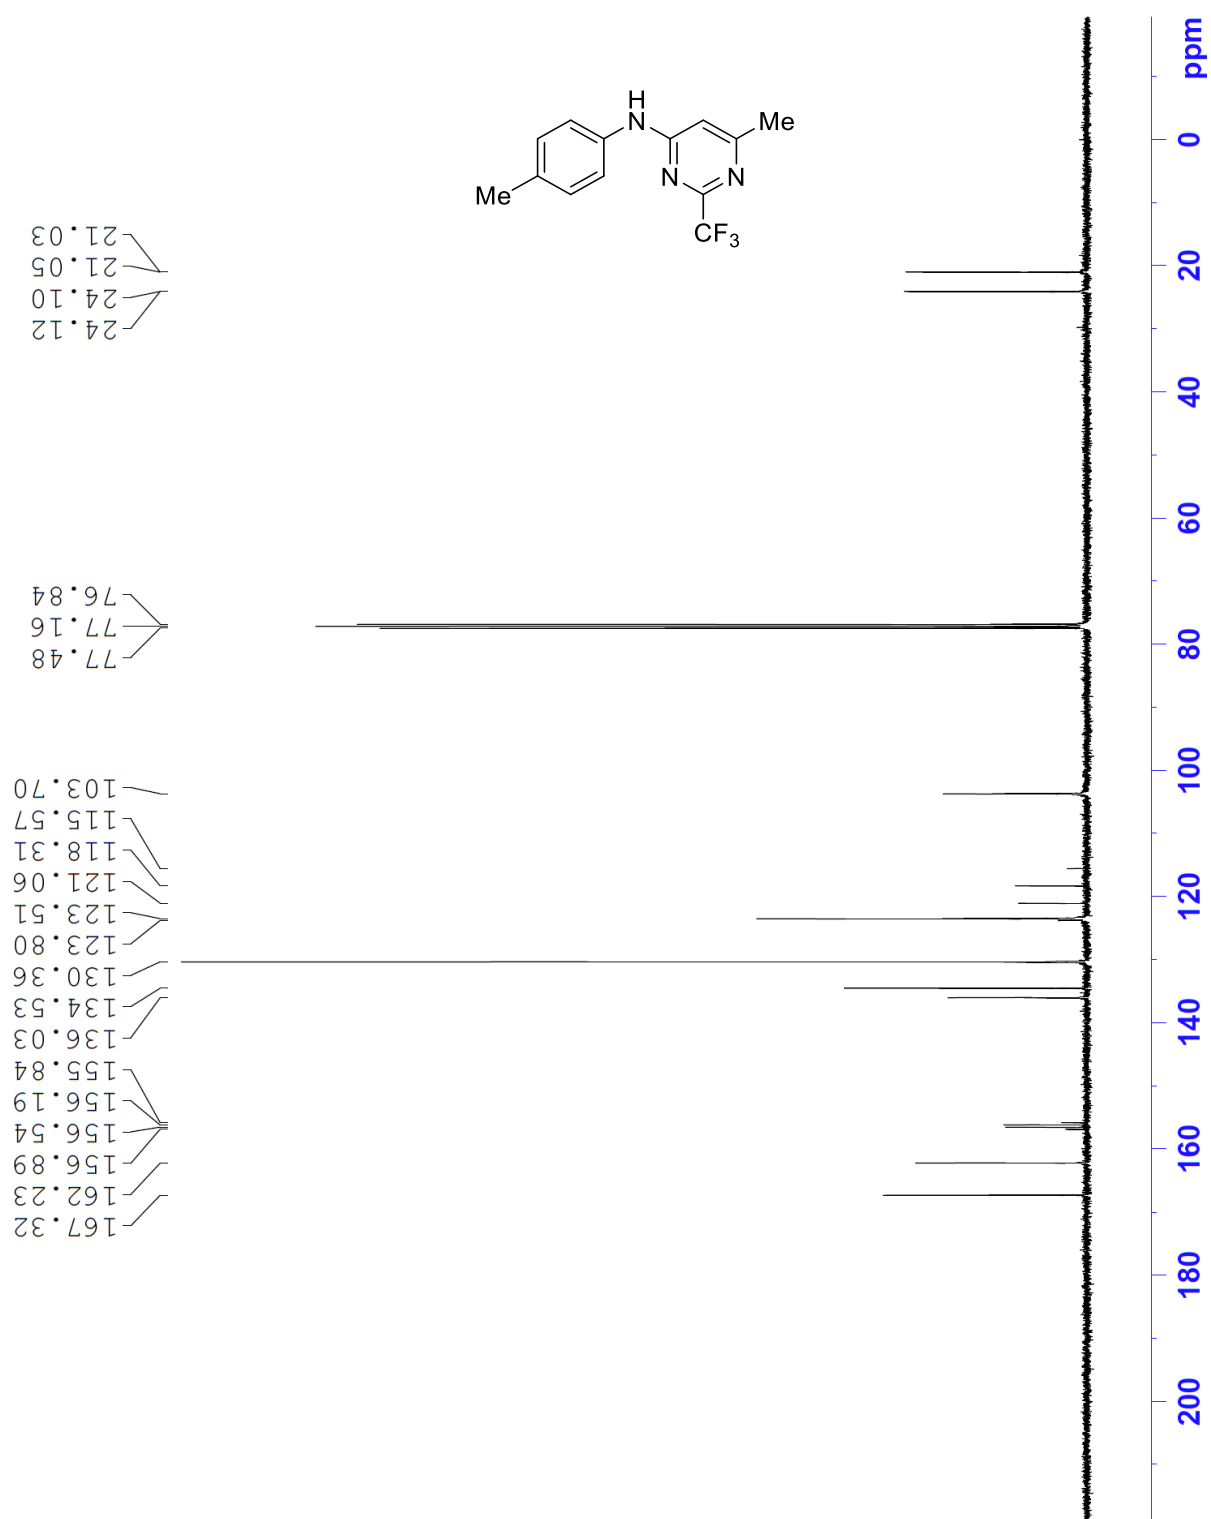

**<sup>19</sup>F NMR (376 MHz, CDCl<sub>3</sub>) of 6-Methyl-N-(*p*-tolyl)-2-(trifluoromethyl)pyrimidin-4-amine (3s)**

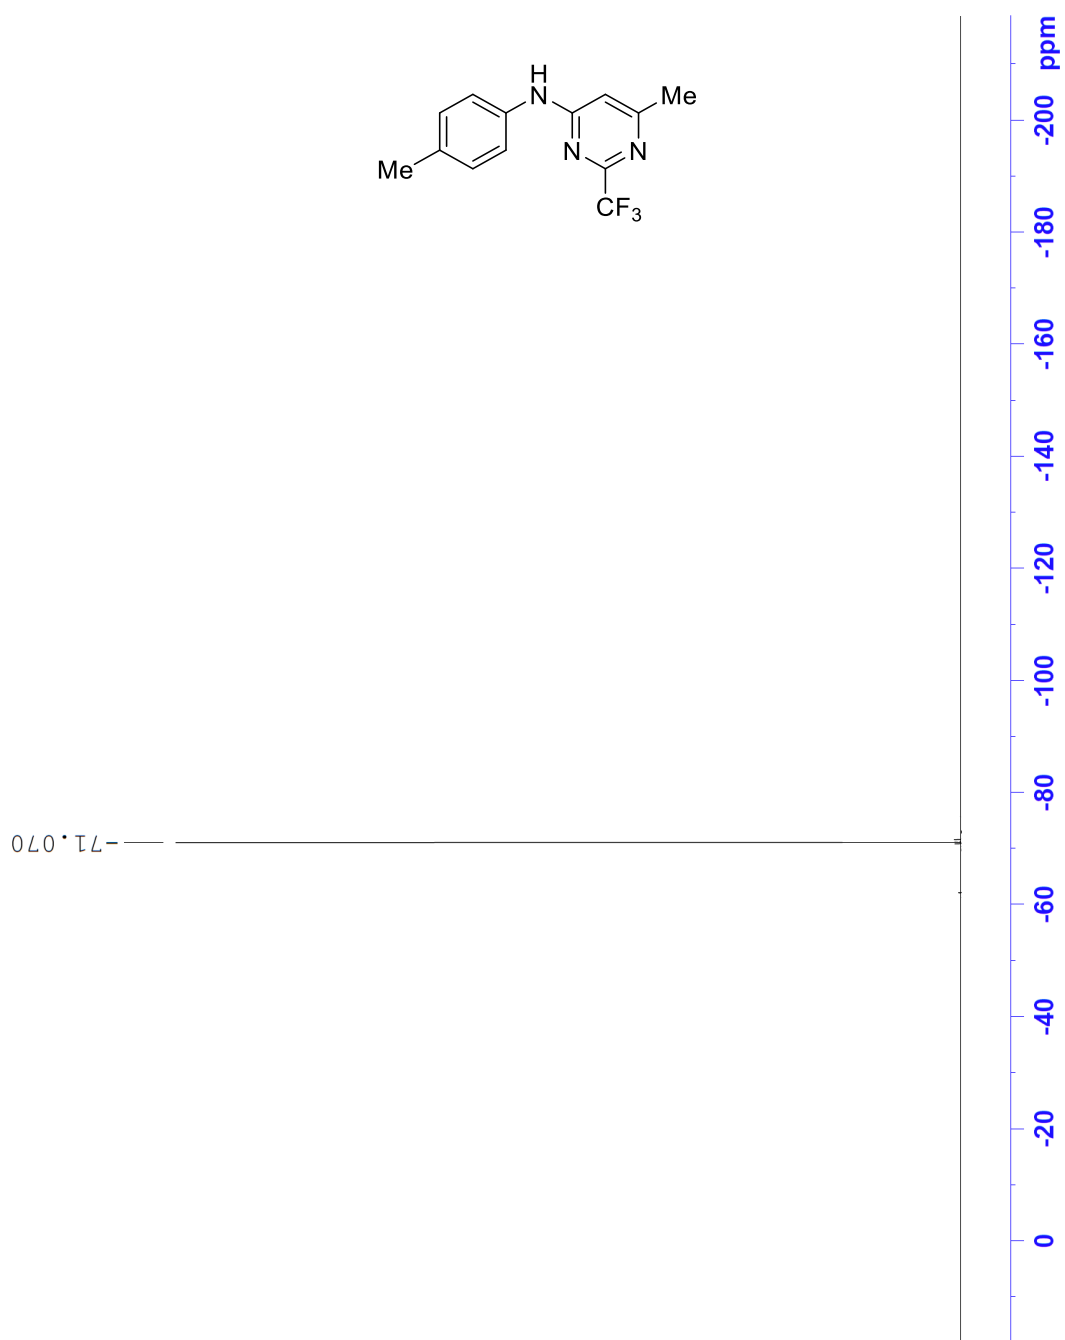

**<sup>1</sup>H NMR (400 MHz, CDCl<sub>3</sub>) of *N*-(4-Methoxyphenyl)-6-methyl-2-(trifluoromethyl)pyrimidin-4-amine (3t)**

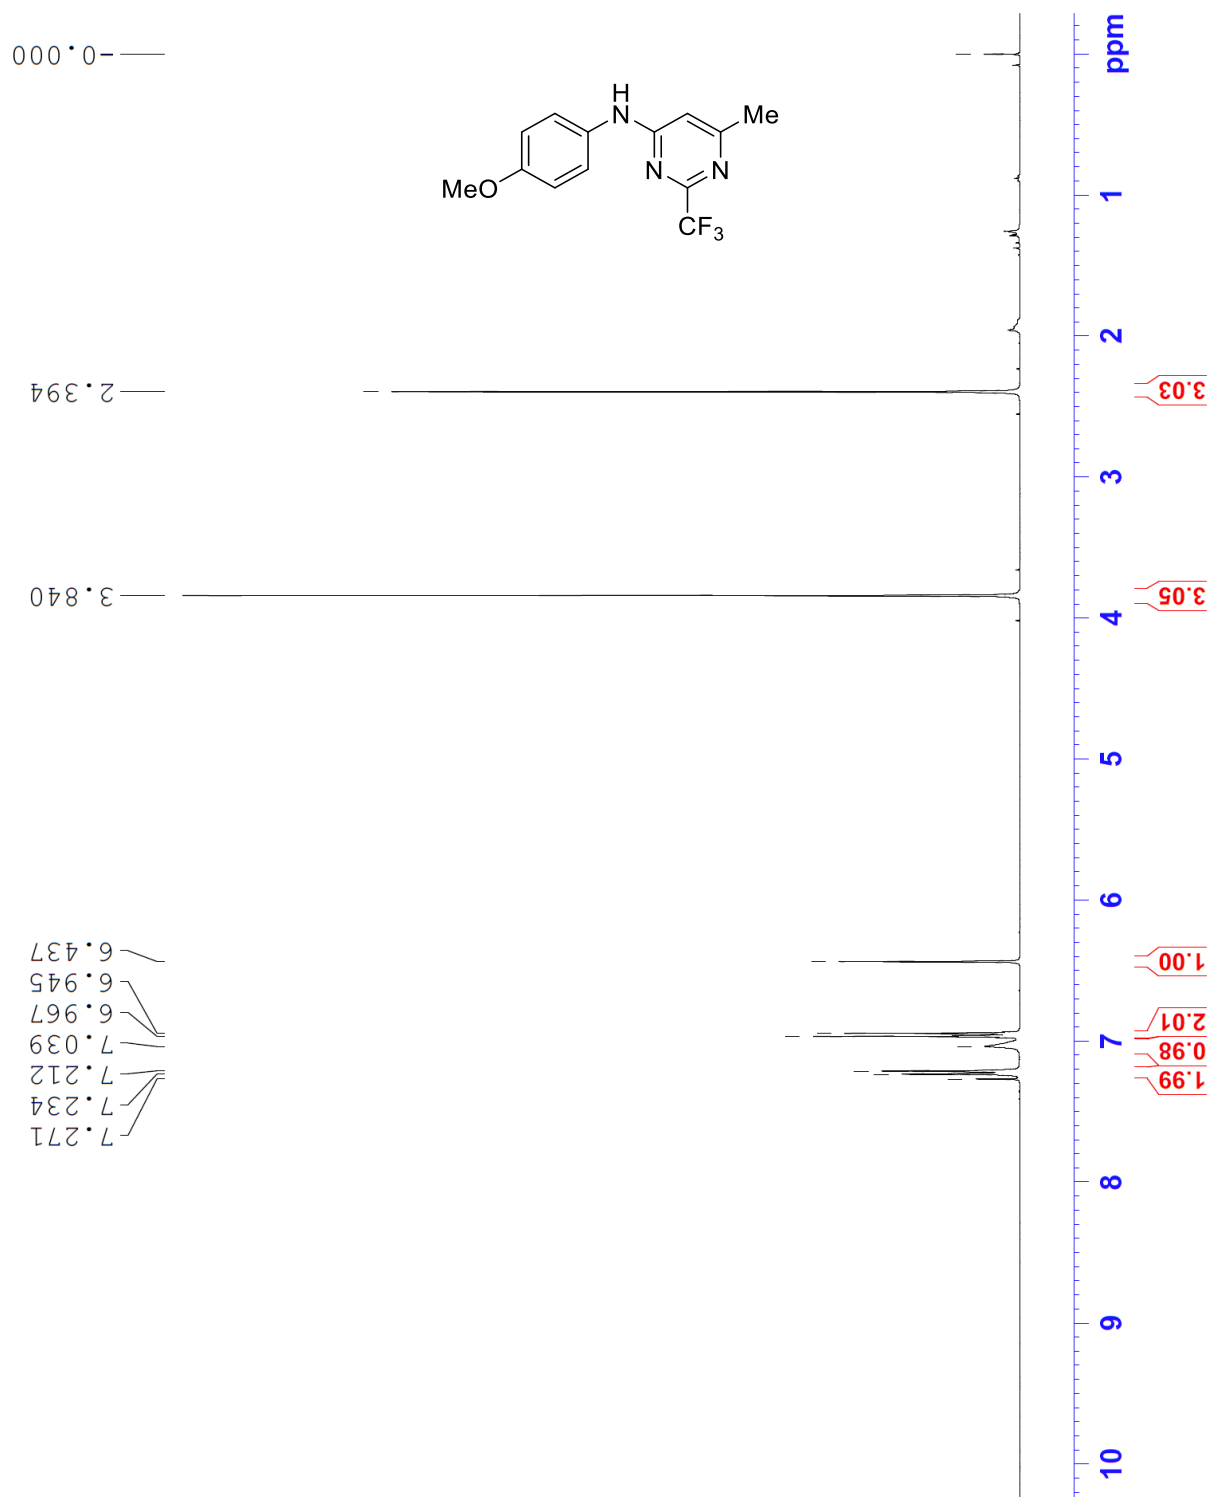



**<sup>13</sup>C NMR (100.6 MHz, CDCl<sub>3</sub>) of *N*-(4-Methoxyphenyl)-6-methyl-2-(trifluoromethyl)pyrimidin-4-amine (3t)**

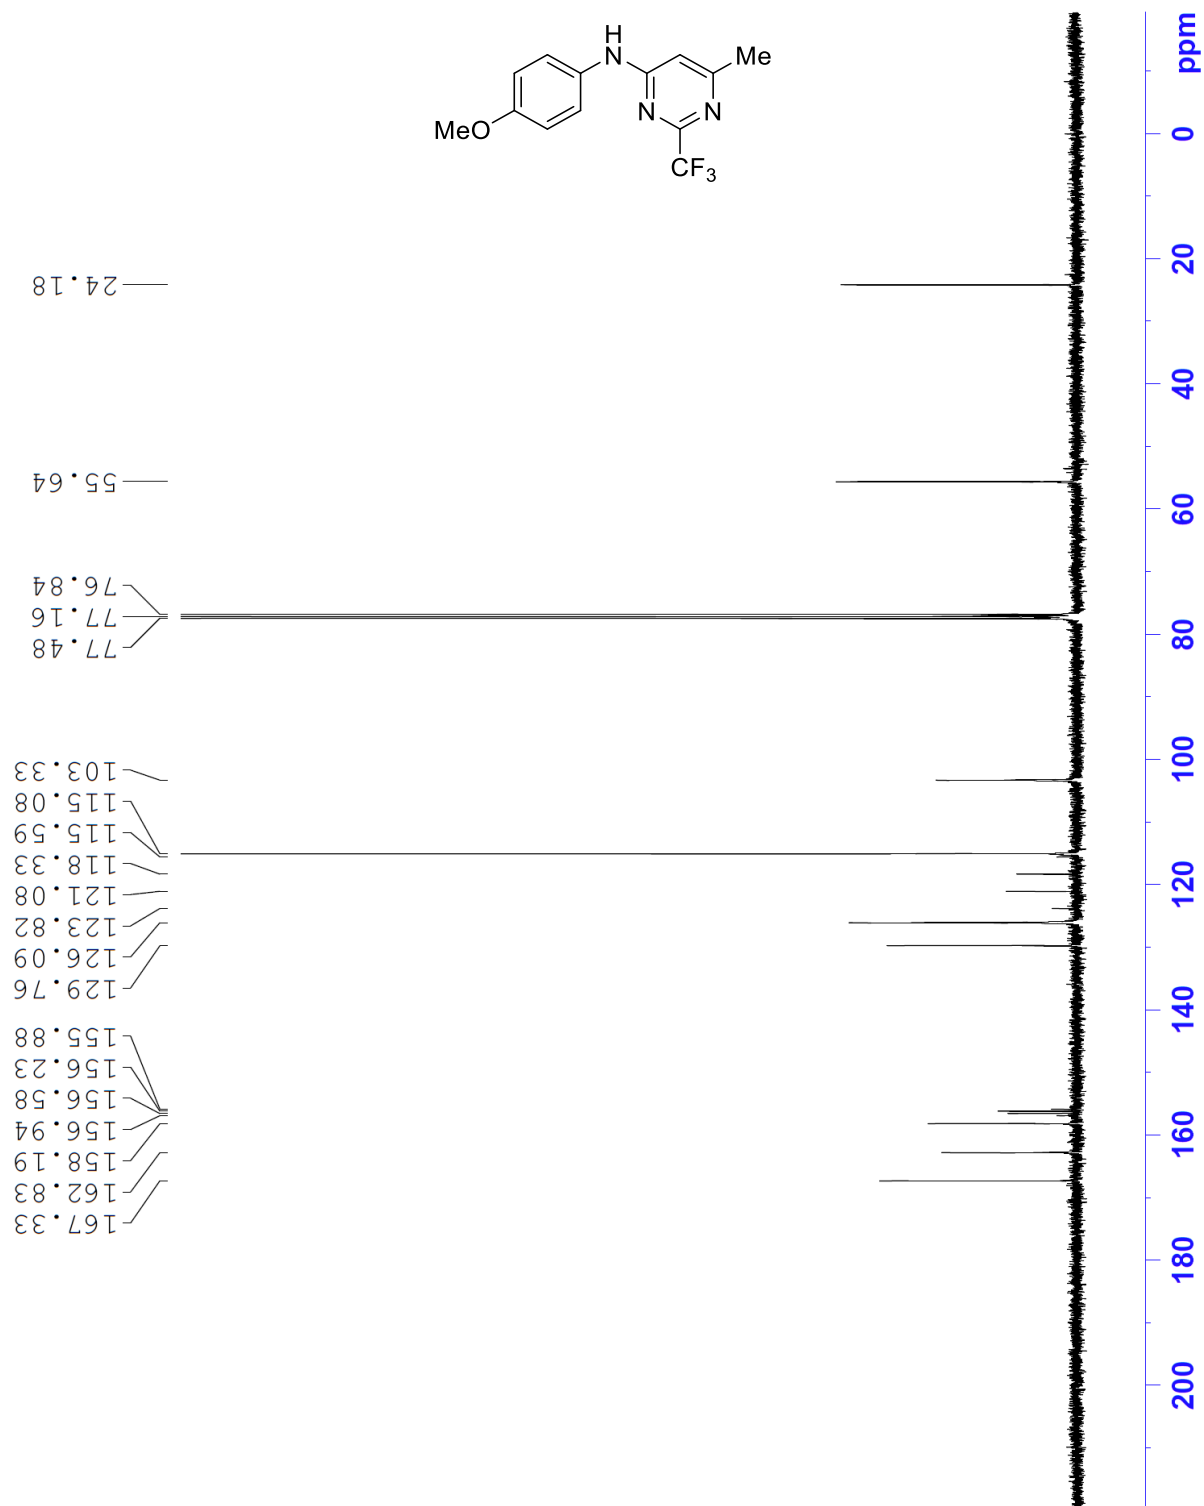

**<sup>19</sup>F NMR (376 MHz, CDCl<sub>3</sub>) of *N*-(4-Methoxyphenyl)-6-methyl-2-(trifluoromethyl)pyrimidin-4-amine (3t)**

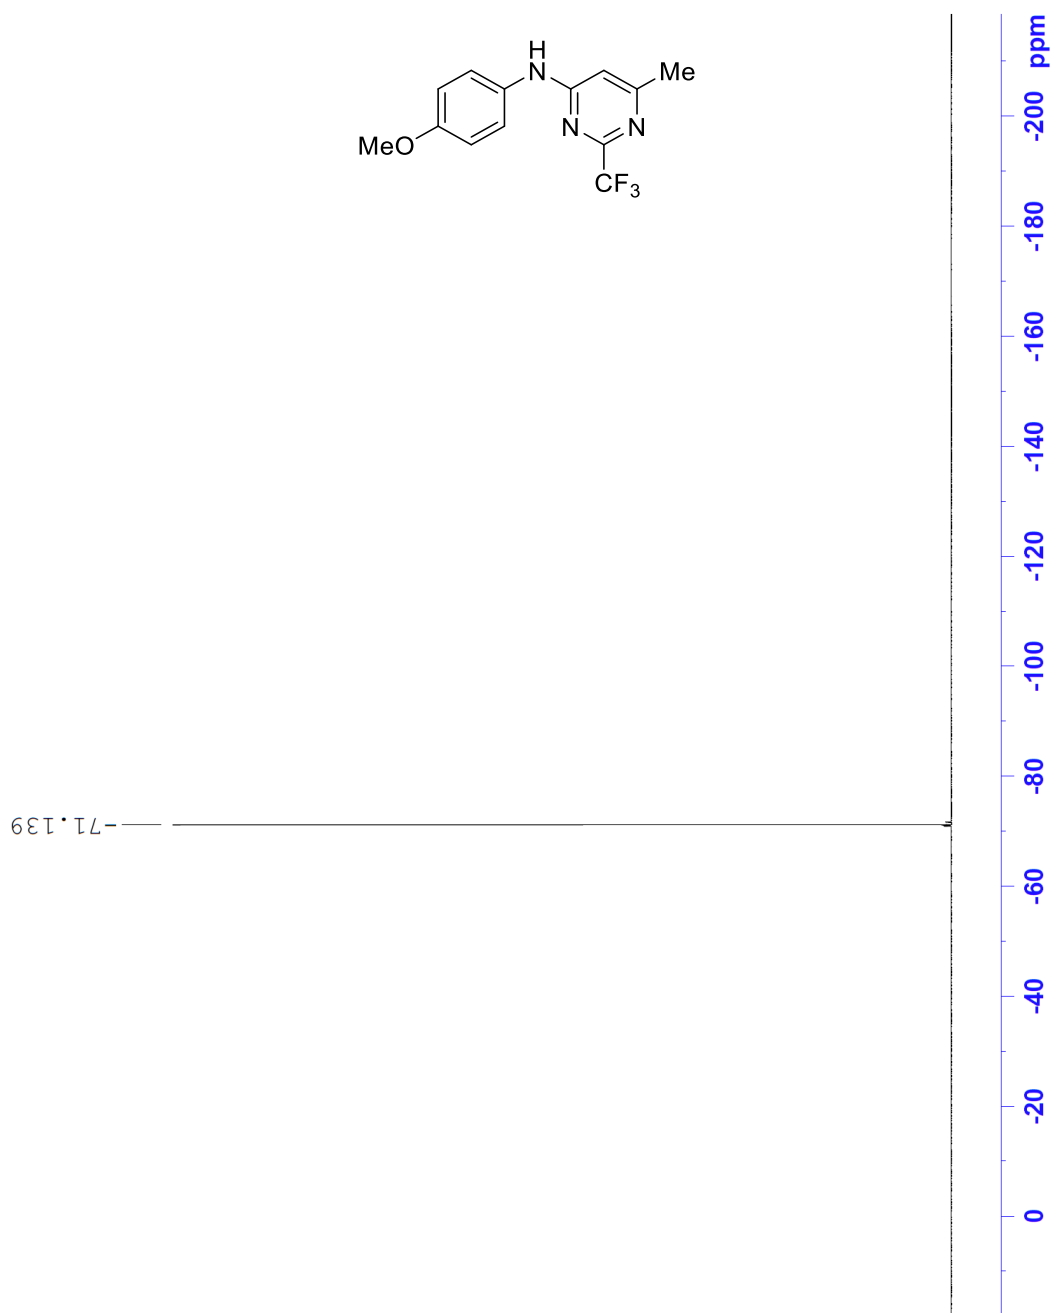

<sup>1</sup>H NMR (400 MHz, CDCl<sub>3</sub>) of *N*<sup>1</sup>,*N*<sup>1</sup>-Diethyl-*N*<sup>4</sup>-(6-methyl-2-(trifluoromethyl)pyrimidin-4-yl)benzene-1,4-diamine (3u)

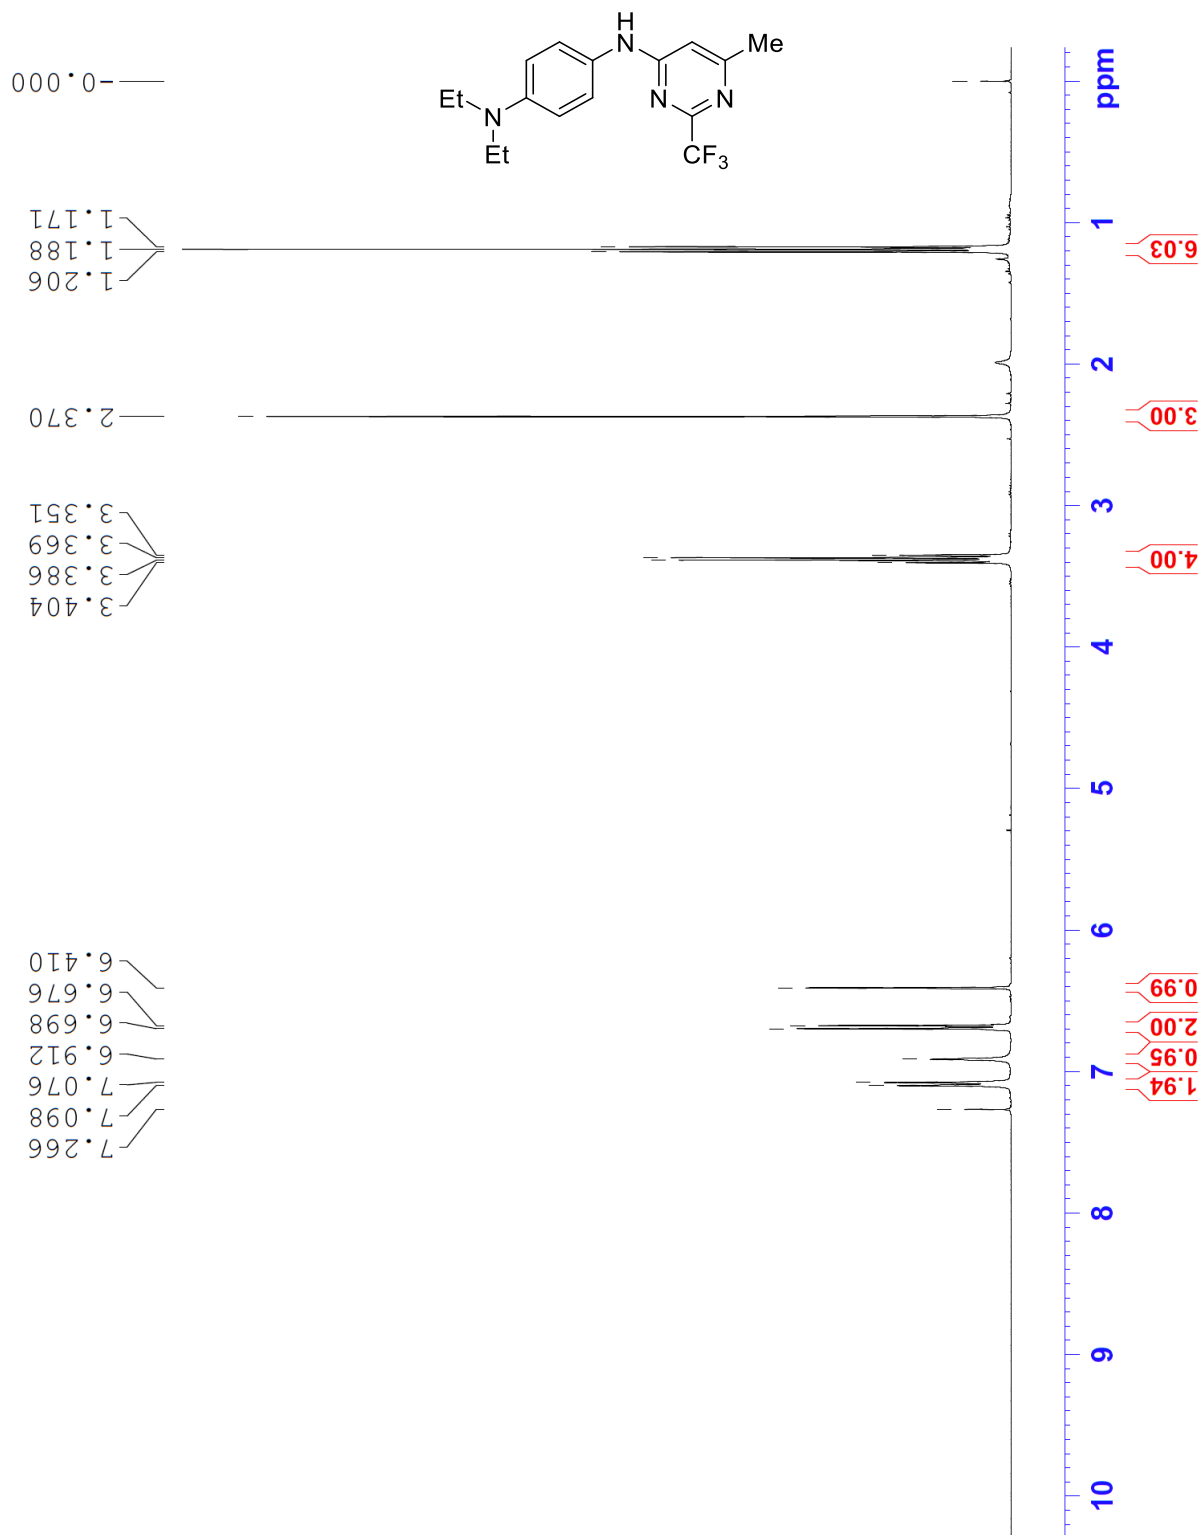

$^{13}\text{C}$  NMR (100.6 MHz,  $\text{CDCl}_3$ ) of  $N^1,N^1$ -Diethyl- $N^4$ -(6-methyl-2-(trifluoromethyl)pyrimidin-4-yl)benzene-1,4-diamine (3u)

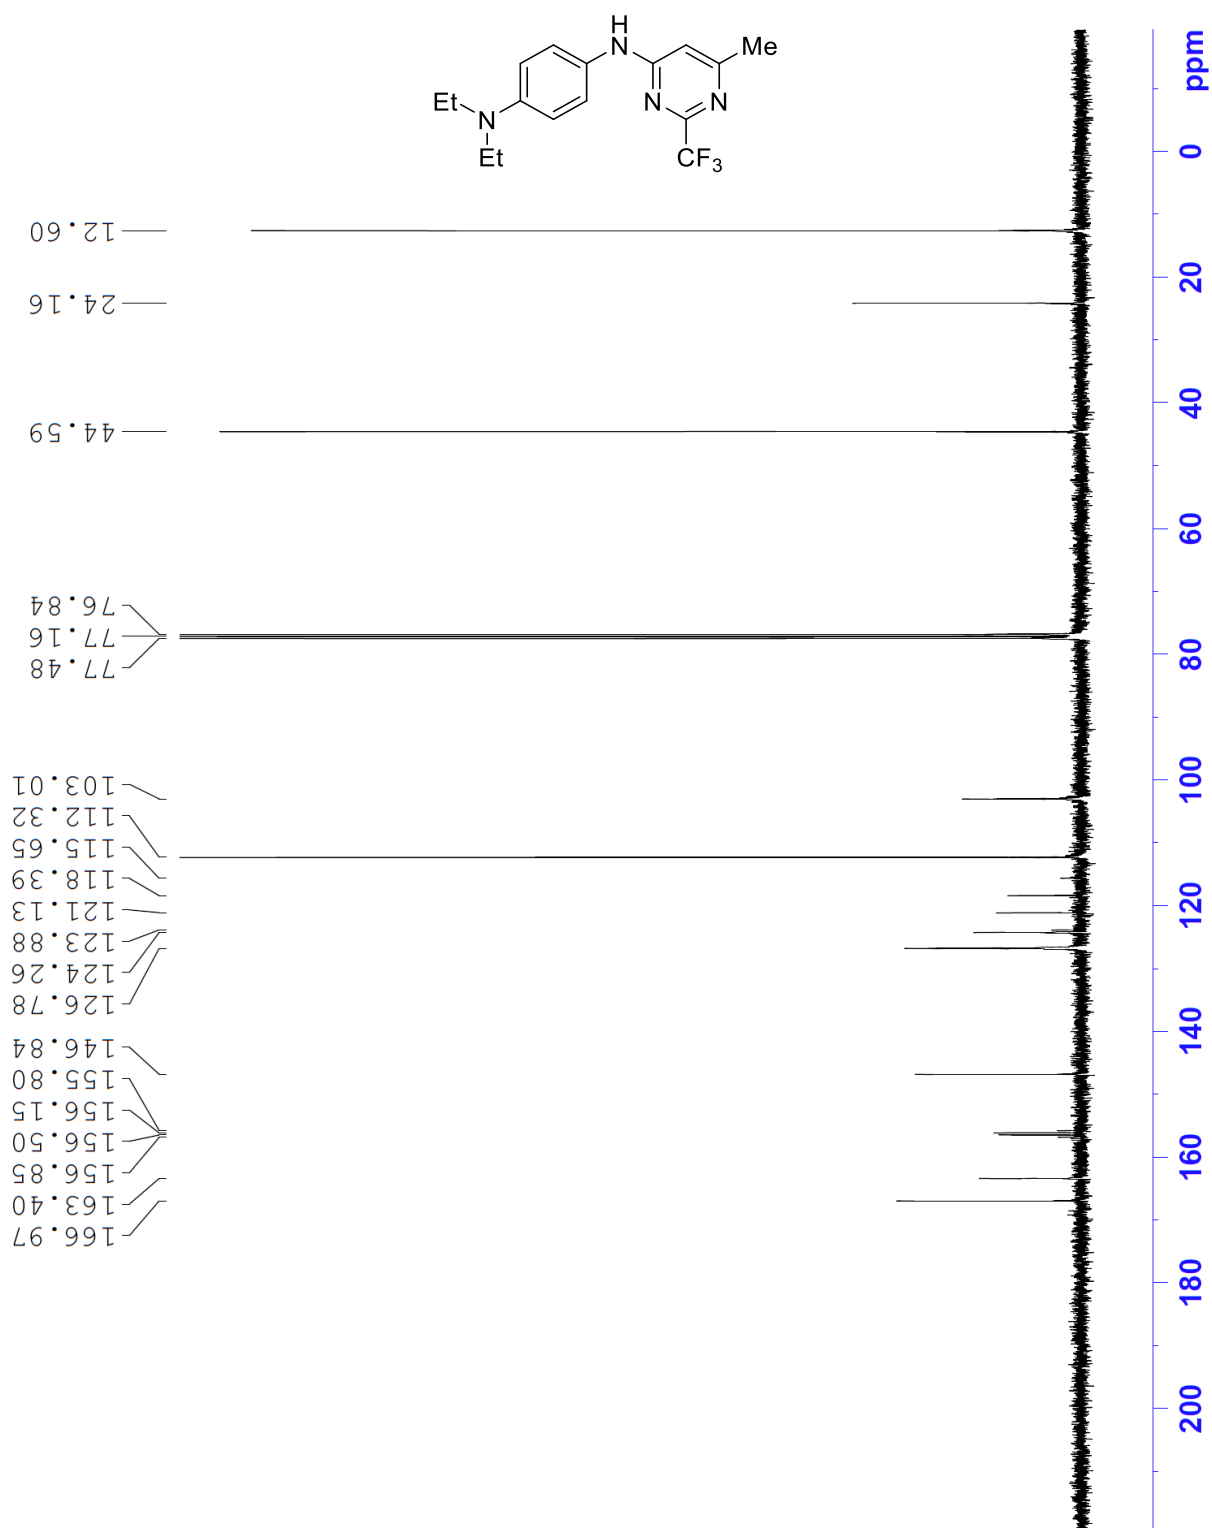

$^{19}\text{F}$  NMR (376 MHz,  $\text{CDCl}_3$ ) of  $N^1,N^1$ -Diethyl- $N^4$ -(6-methyl-2-(trifluoromethyl)pyrimidin-4-yl)benzene-1,4-diamine (3u)

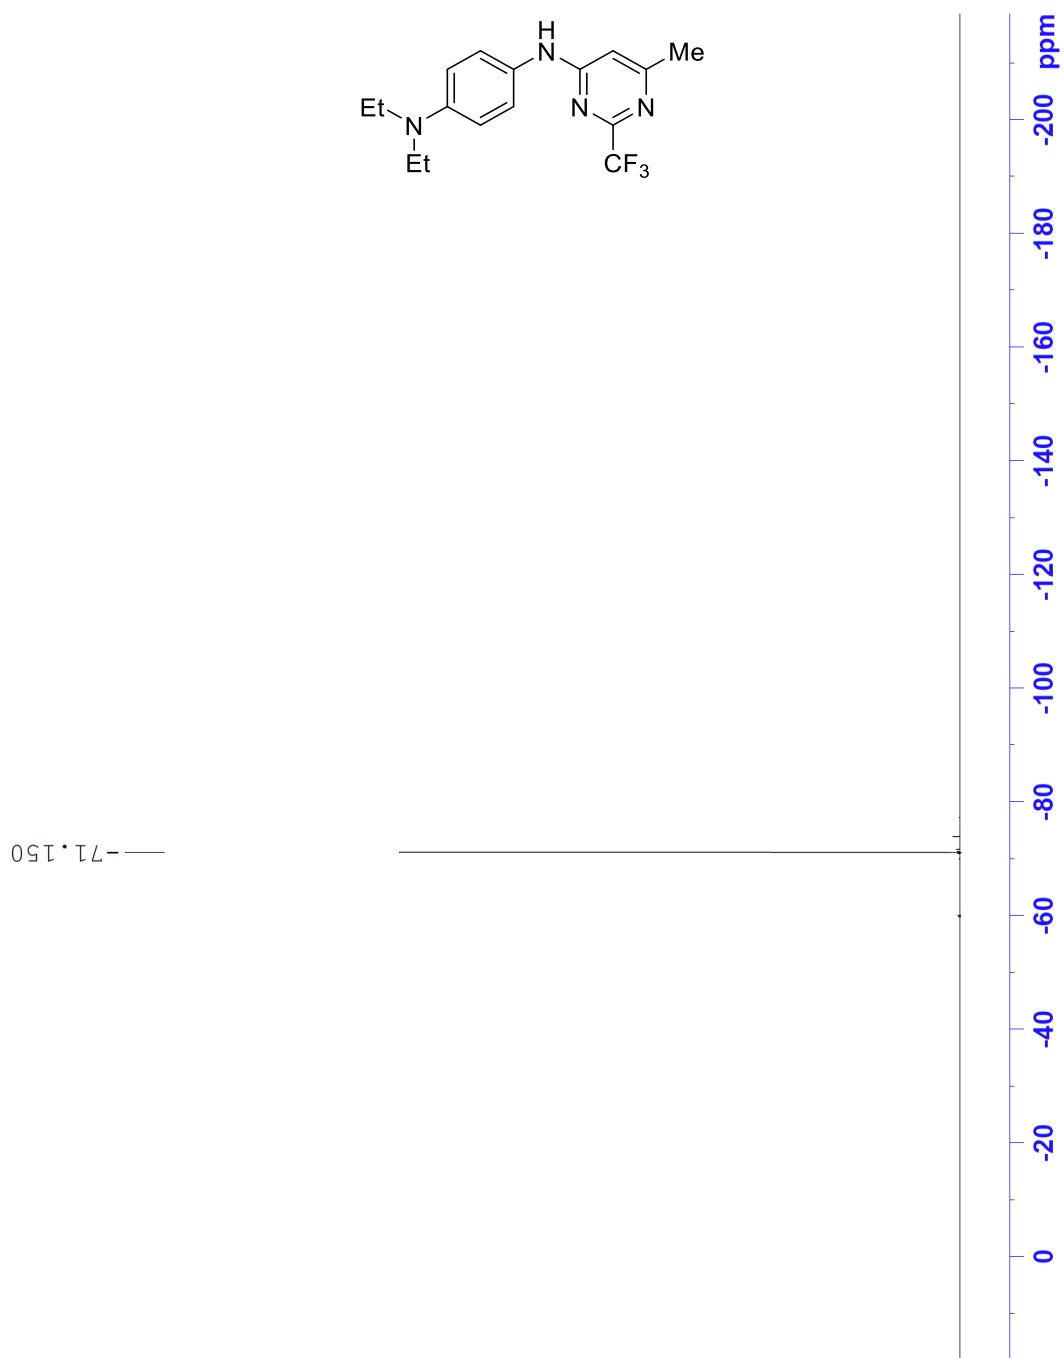

<sup>1</sup>H NMR (400 MHz, CDCl<sub>3</sub>) of *N*-(4-Chlorophenyl)-6-methyl-2-(trifluoromethyl)pyrimidin-4-amine (3v)

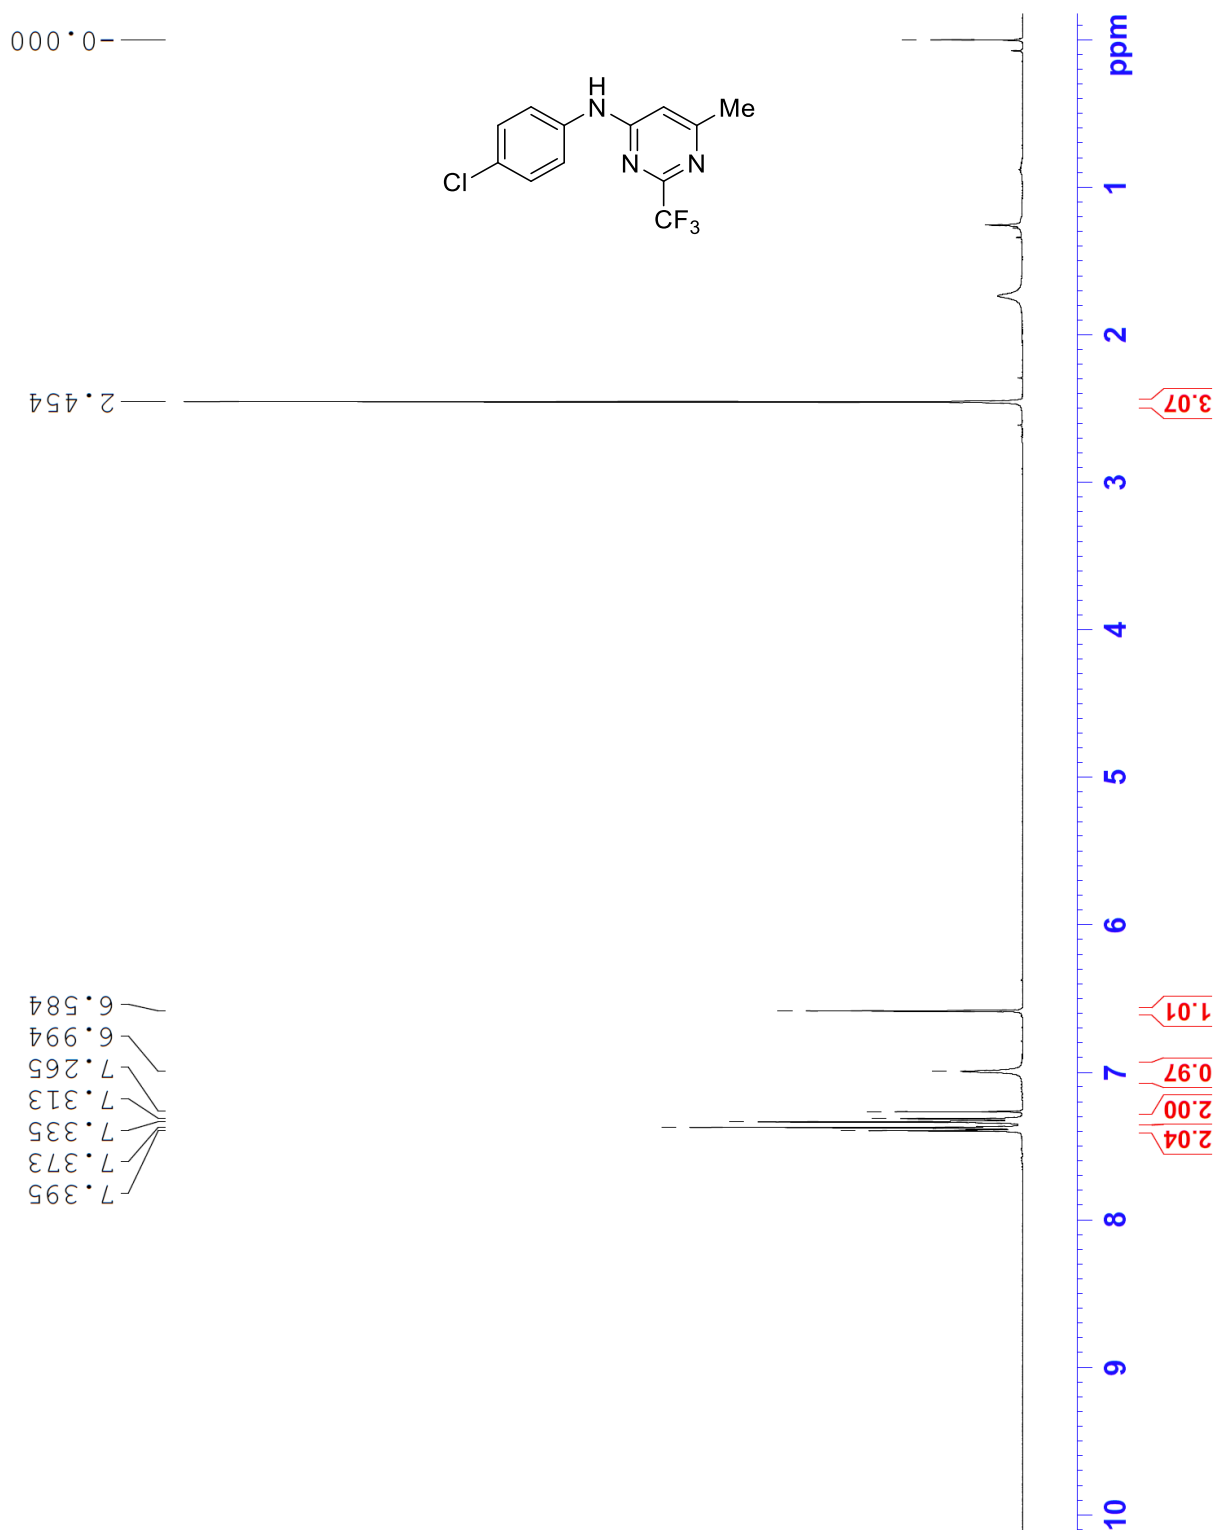

<sup>13</sup>C NMR (100.6 MHz, CDCl<sub>3</sub>) of *N*-(4-Chlorophenyl)-6-methyl-2-(trifluoromethyl)pyrimidin-4-amine (3v)

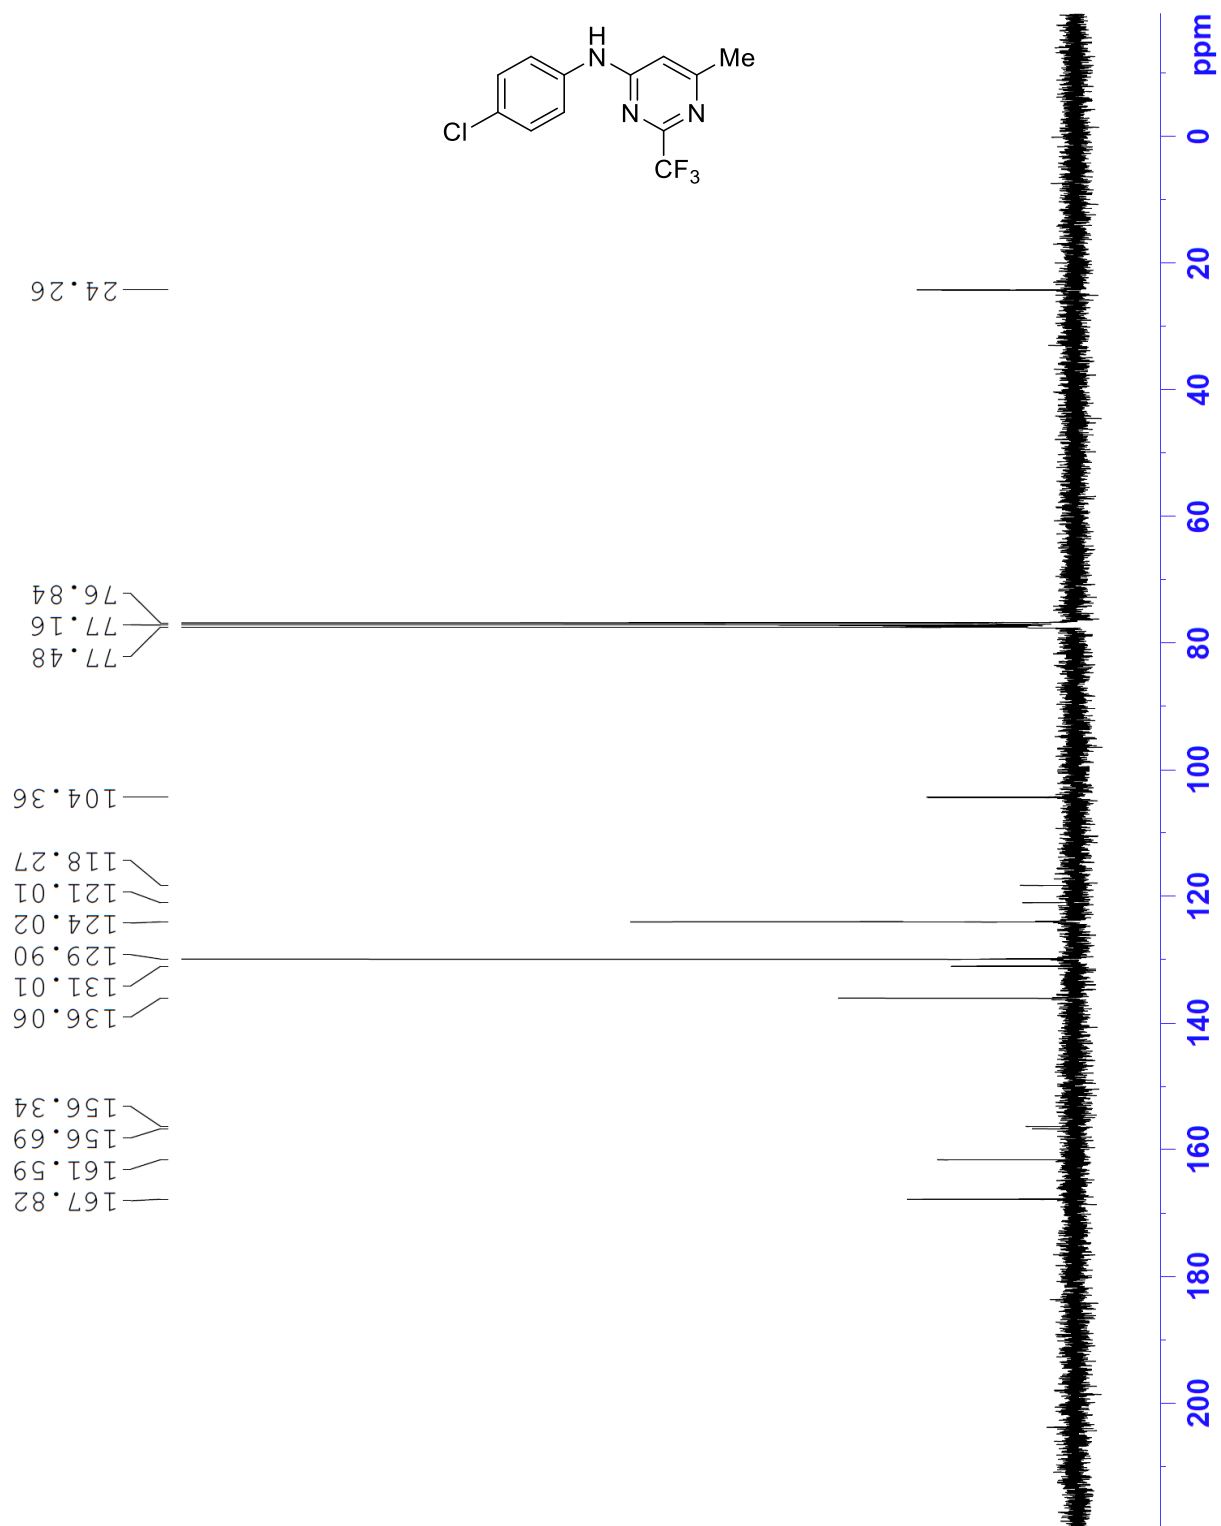

<sup>19</sup>F NMR (376 MHz, CDCl<sub>3</sub>) of *N*-(4-Chlorophenyl)-6-methyl-2-(trifluoromethyl)pyrimidin-4-amine (3v)

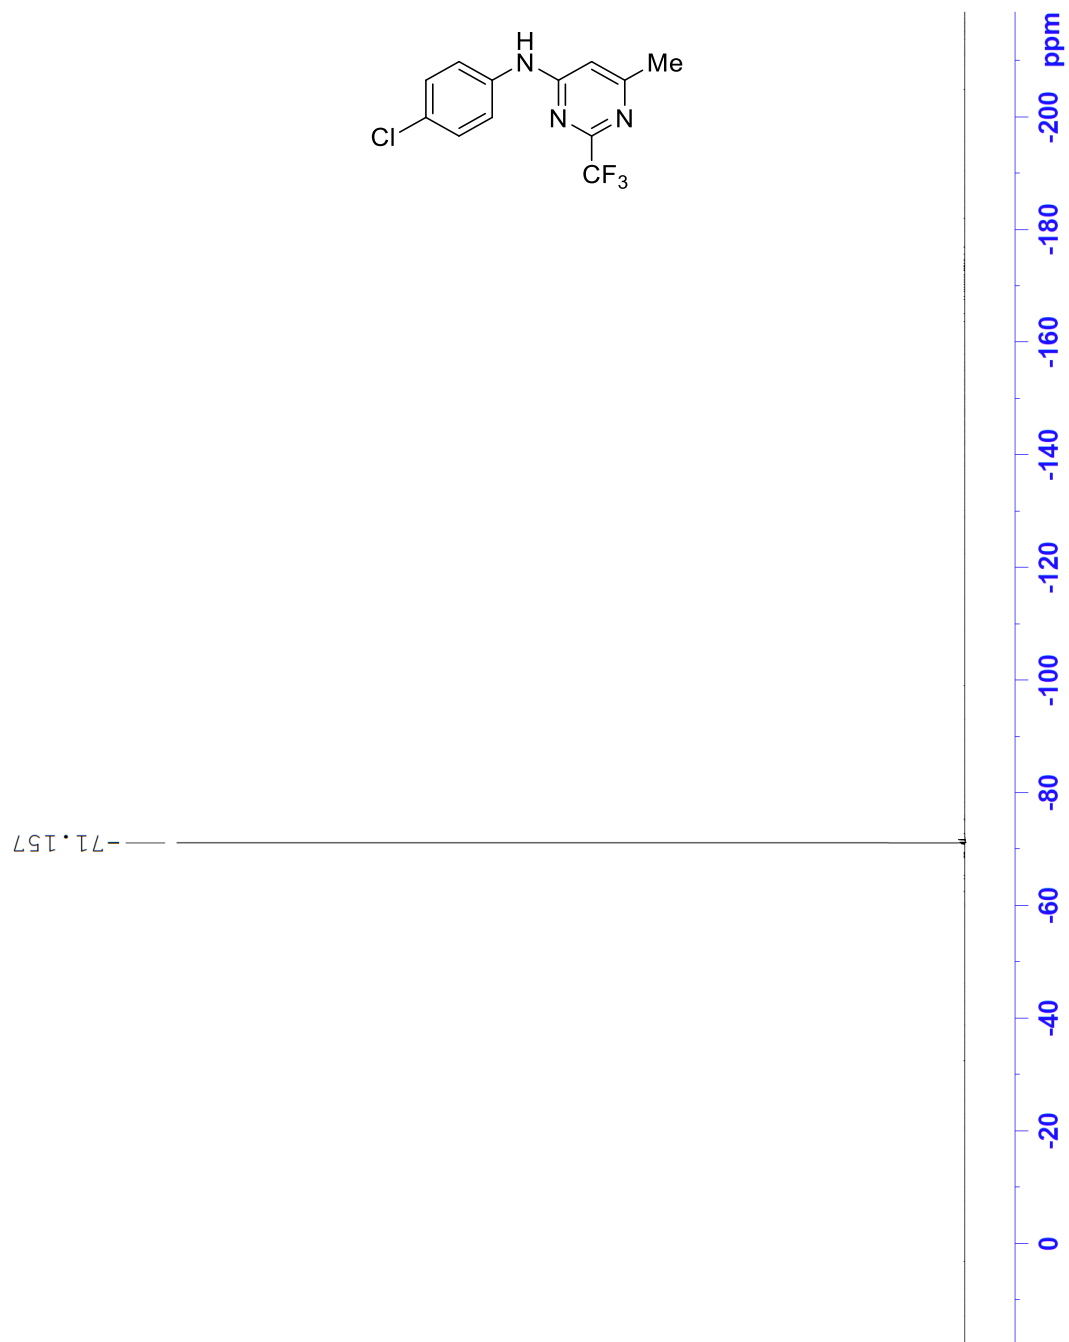



**<sup>1</sup>H NMR (400 MHz, CDCl<sub>3</sub>) of N-(4-(*tert*-Butyl)phenyl)-6-methyl-2-(trifluoromethyl)pyrimidin-4-amine (3w)**

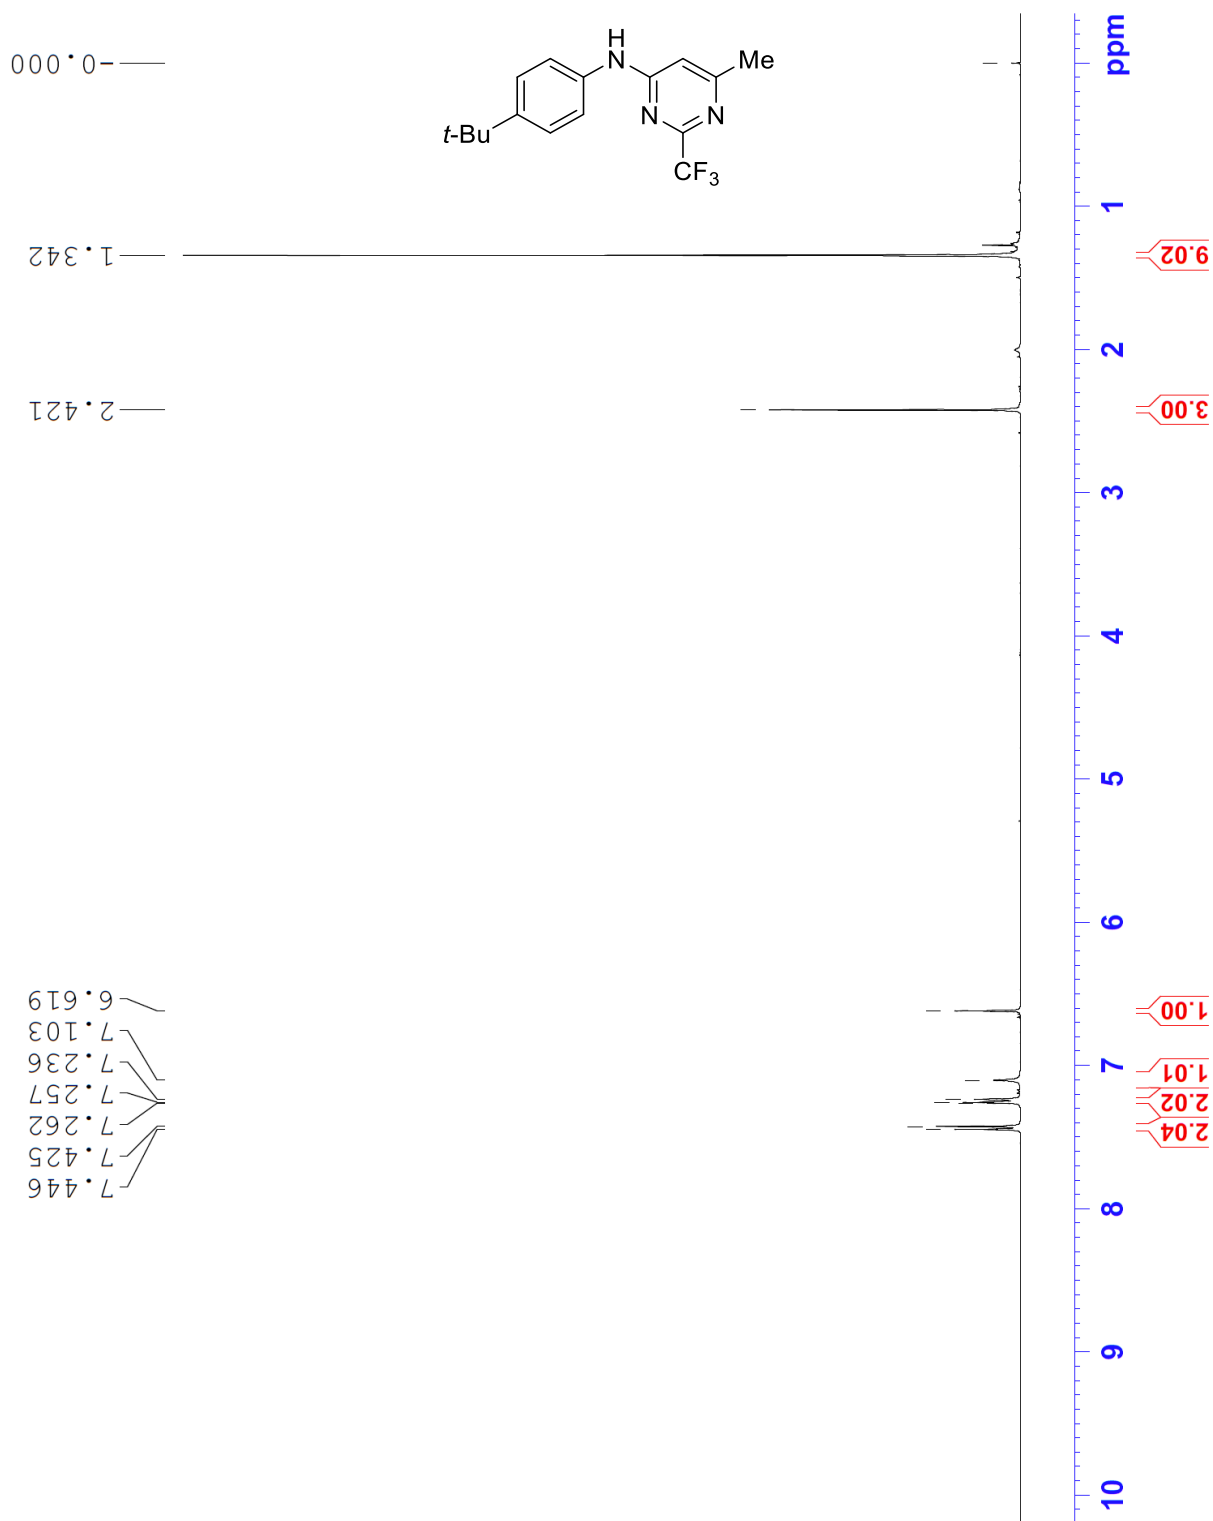

**<sup>13</sup>C NMR (100.6 MHz, CDCl<sub>3</sub>) of *N*-(4-(*tert*-Butyl)phenyl)-6-methyl-2-(trifluoromethyl)pyrimidin-4-amine (3w)**

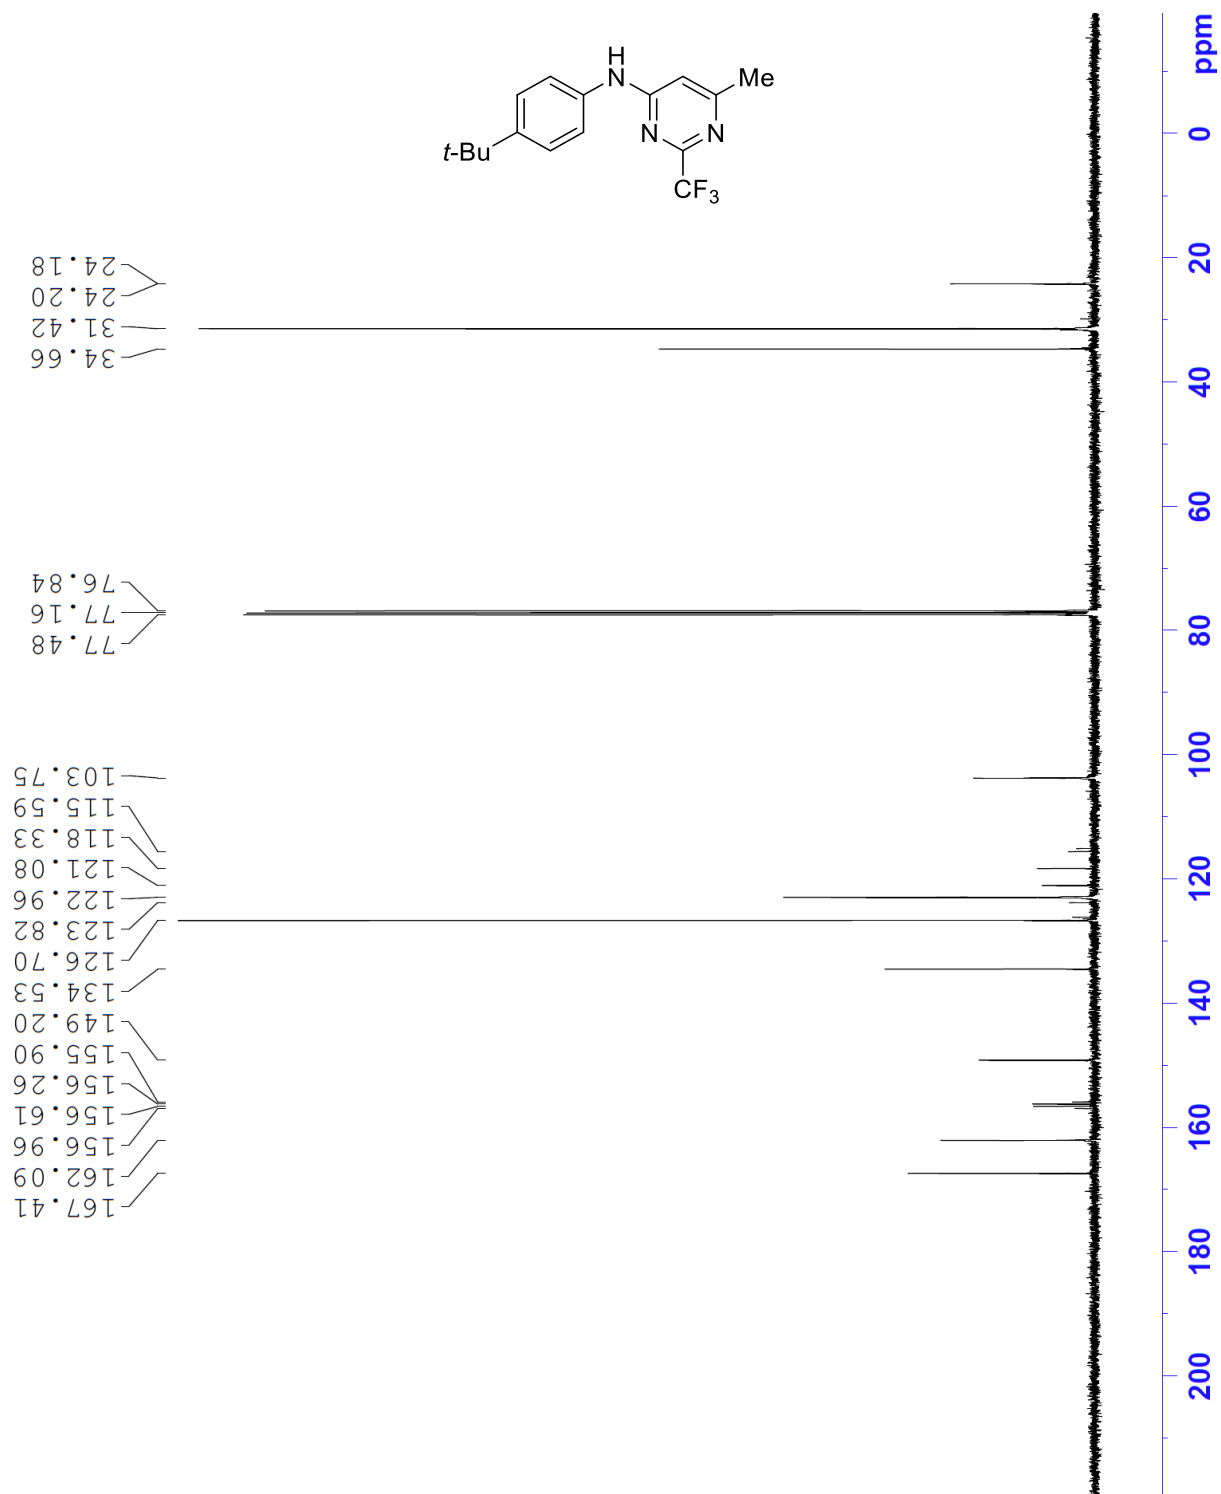

**<sup>19</sup>F NMR (376 MHz, CDCl<sub>3</sub>) of *N*-(4-(*tert*-Butyl)phenyl)-6-methyl-2-(trifluoromethyl)pyrimidin-4-amine (3w)**

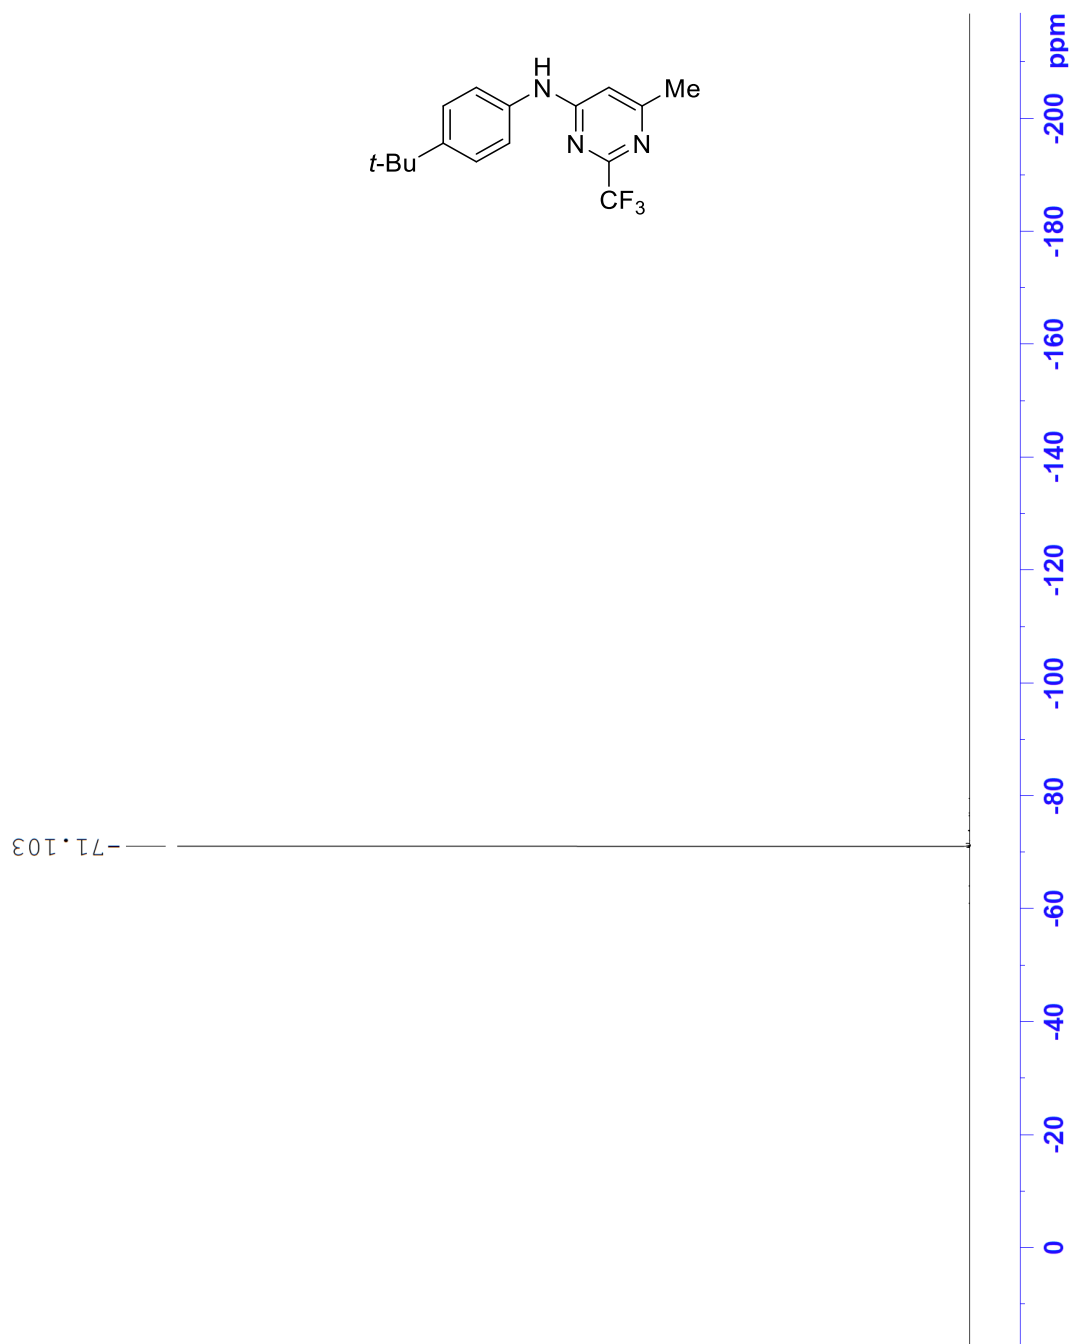

**<sup>1</sup>H NMR (400 MHz, CDCl<sub>3</sub>) of 6-Methyl-2-(trifluoromethyl)-N-(4-tritylphenyl)pyrimidin-4-amine (3x)**

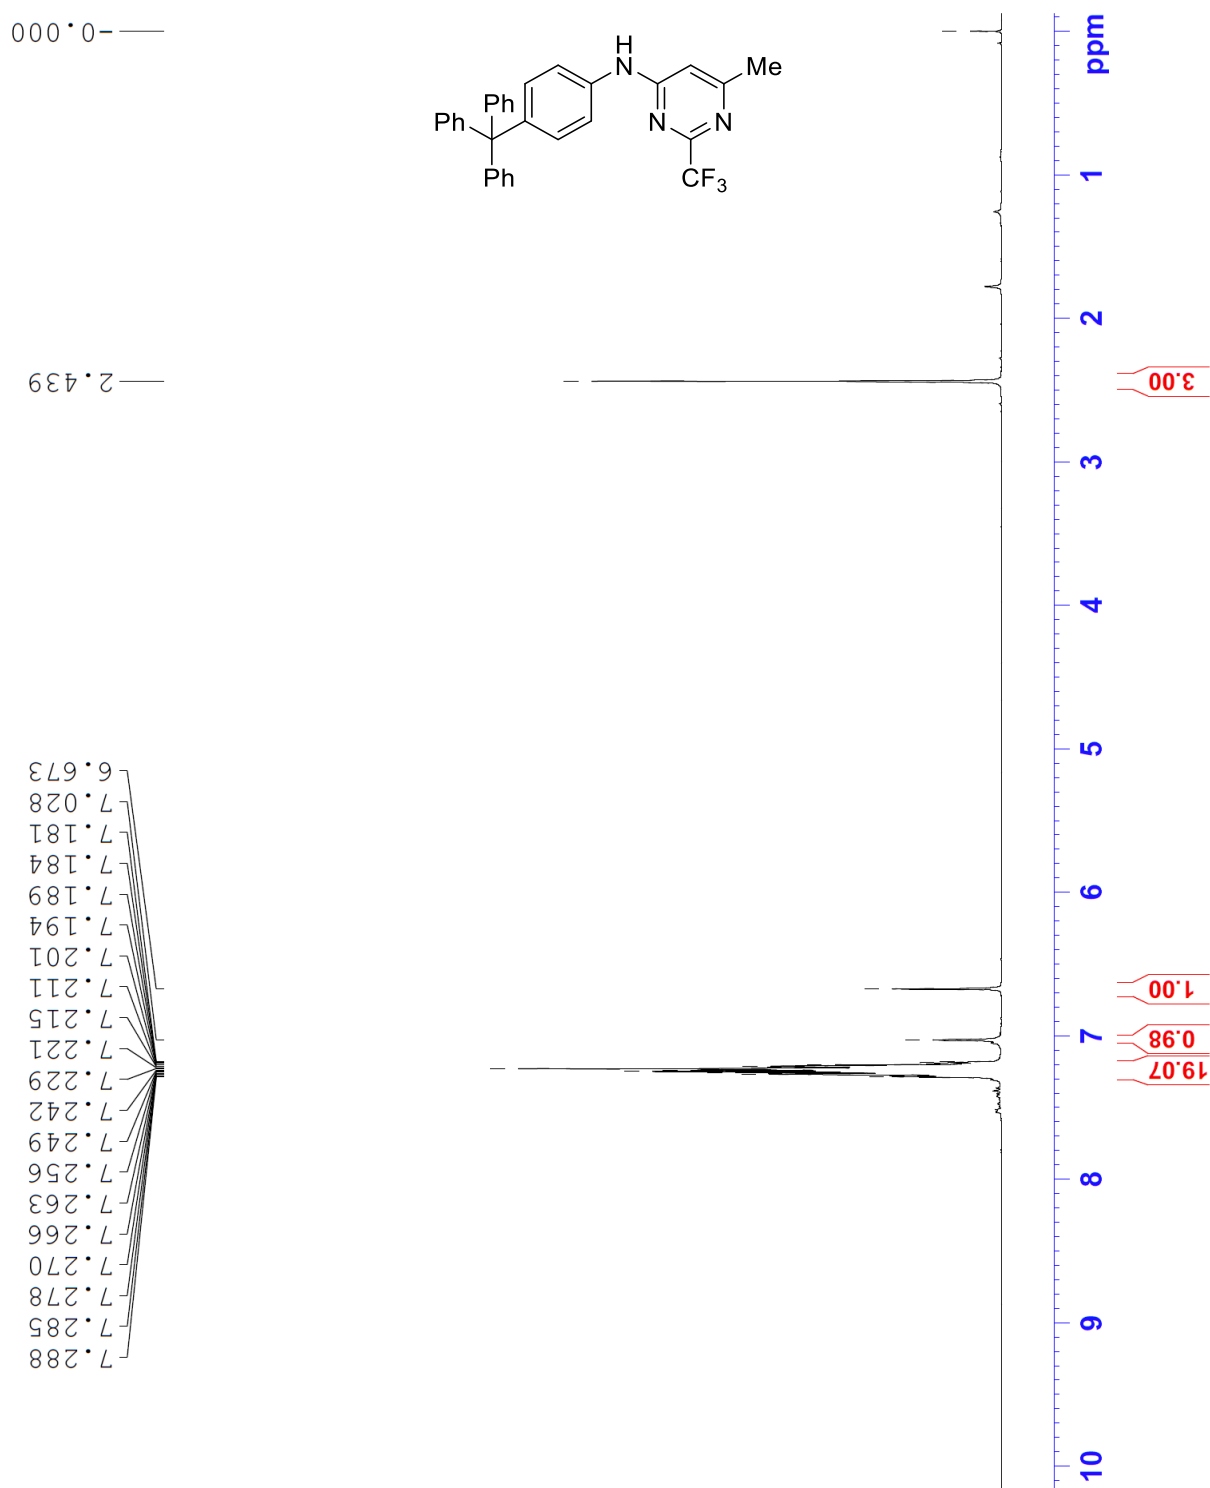

<sup>13</sup>C NMR (100.6 MHz, CDCl<sub>3</sub>) of 6-Methyl-2-(trifluoromethyl)-N-(4-tritylphenyl)pyrimidin-4-amine (3x)

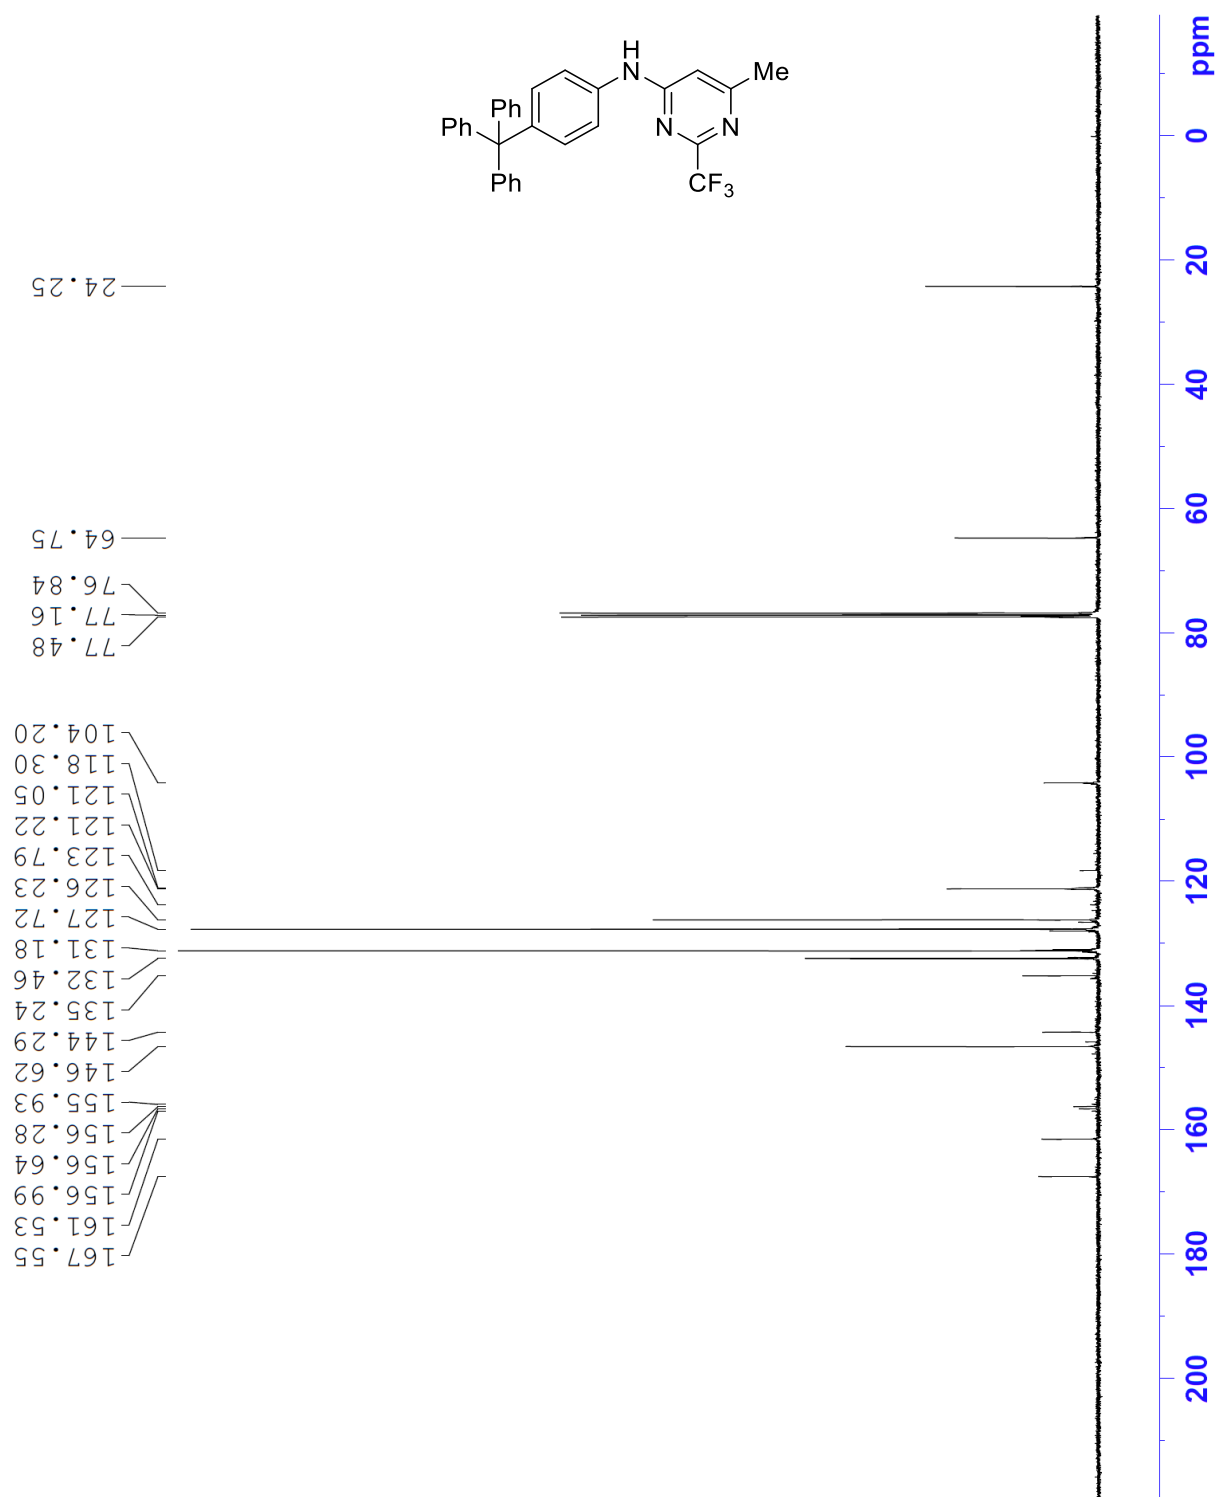

**<sup>19</sup>F NMR (376 MHz, CDCl<sub>3</sub>) of 6-Methyl-2-(trifluoromethyl)-N-(4-tritylphenyl)pyrimidin-4-amine (3x)**

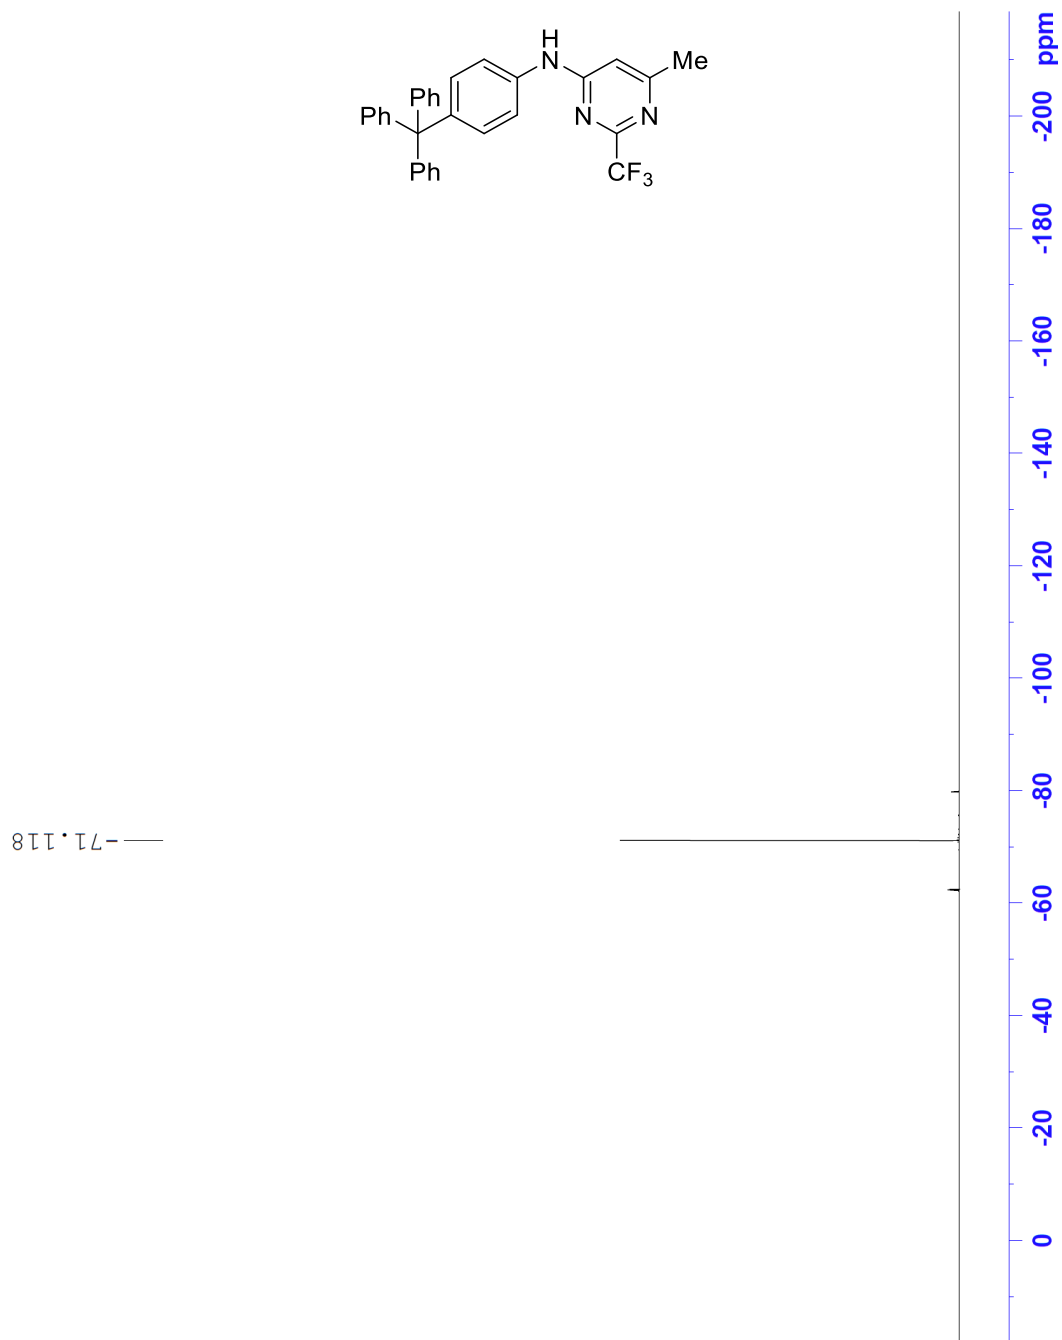

**<sup>1</sup>H NMR (400 MHz, CDCl<sub>3</sub>) of *N*-Mesityl-6-methyl-2-(trifluoromethyl)pyrimidin-4-amine (3y)**

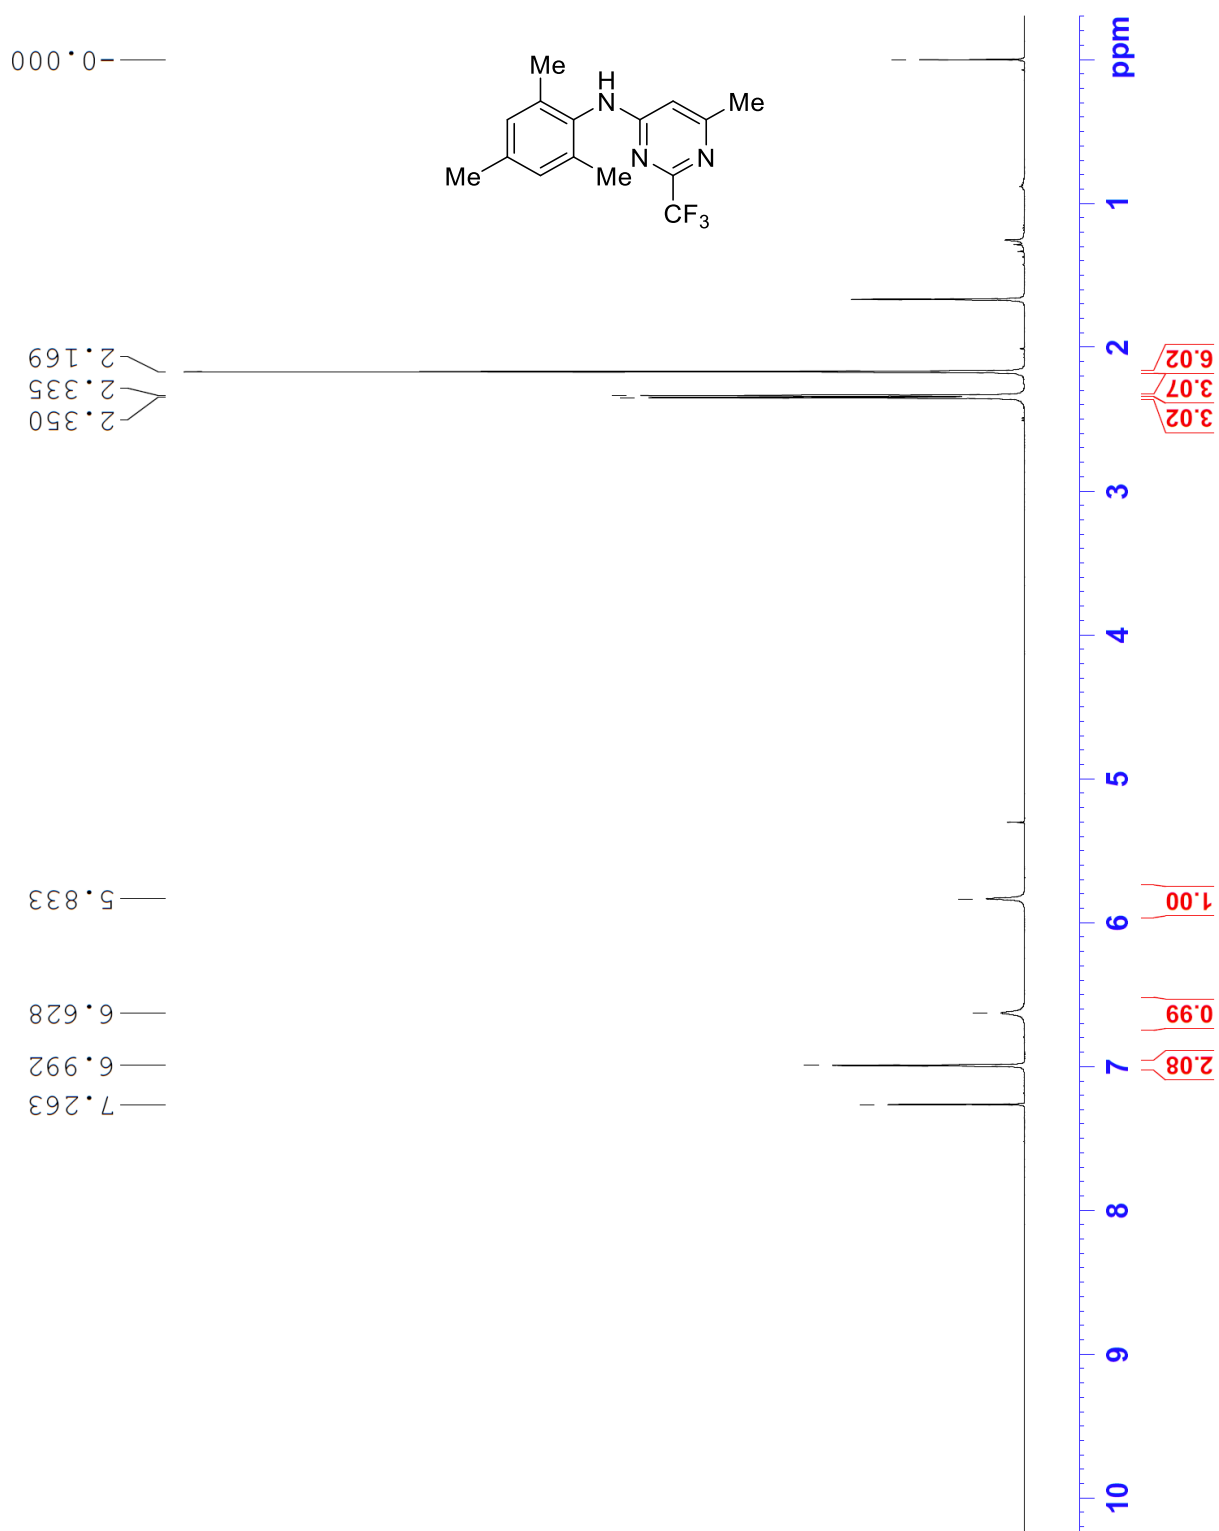

<sup>13</sup>C NMR (100.6 MHz, CDCl<sub>3</sub>) of *N*-Mesityl-6-methyl-2-(trifluoromethyl)pyrimidin-4-amine (3y)

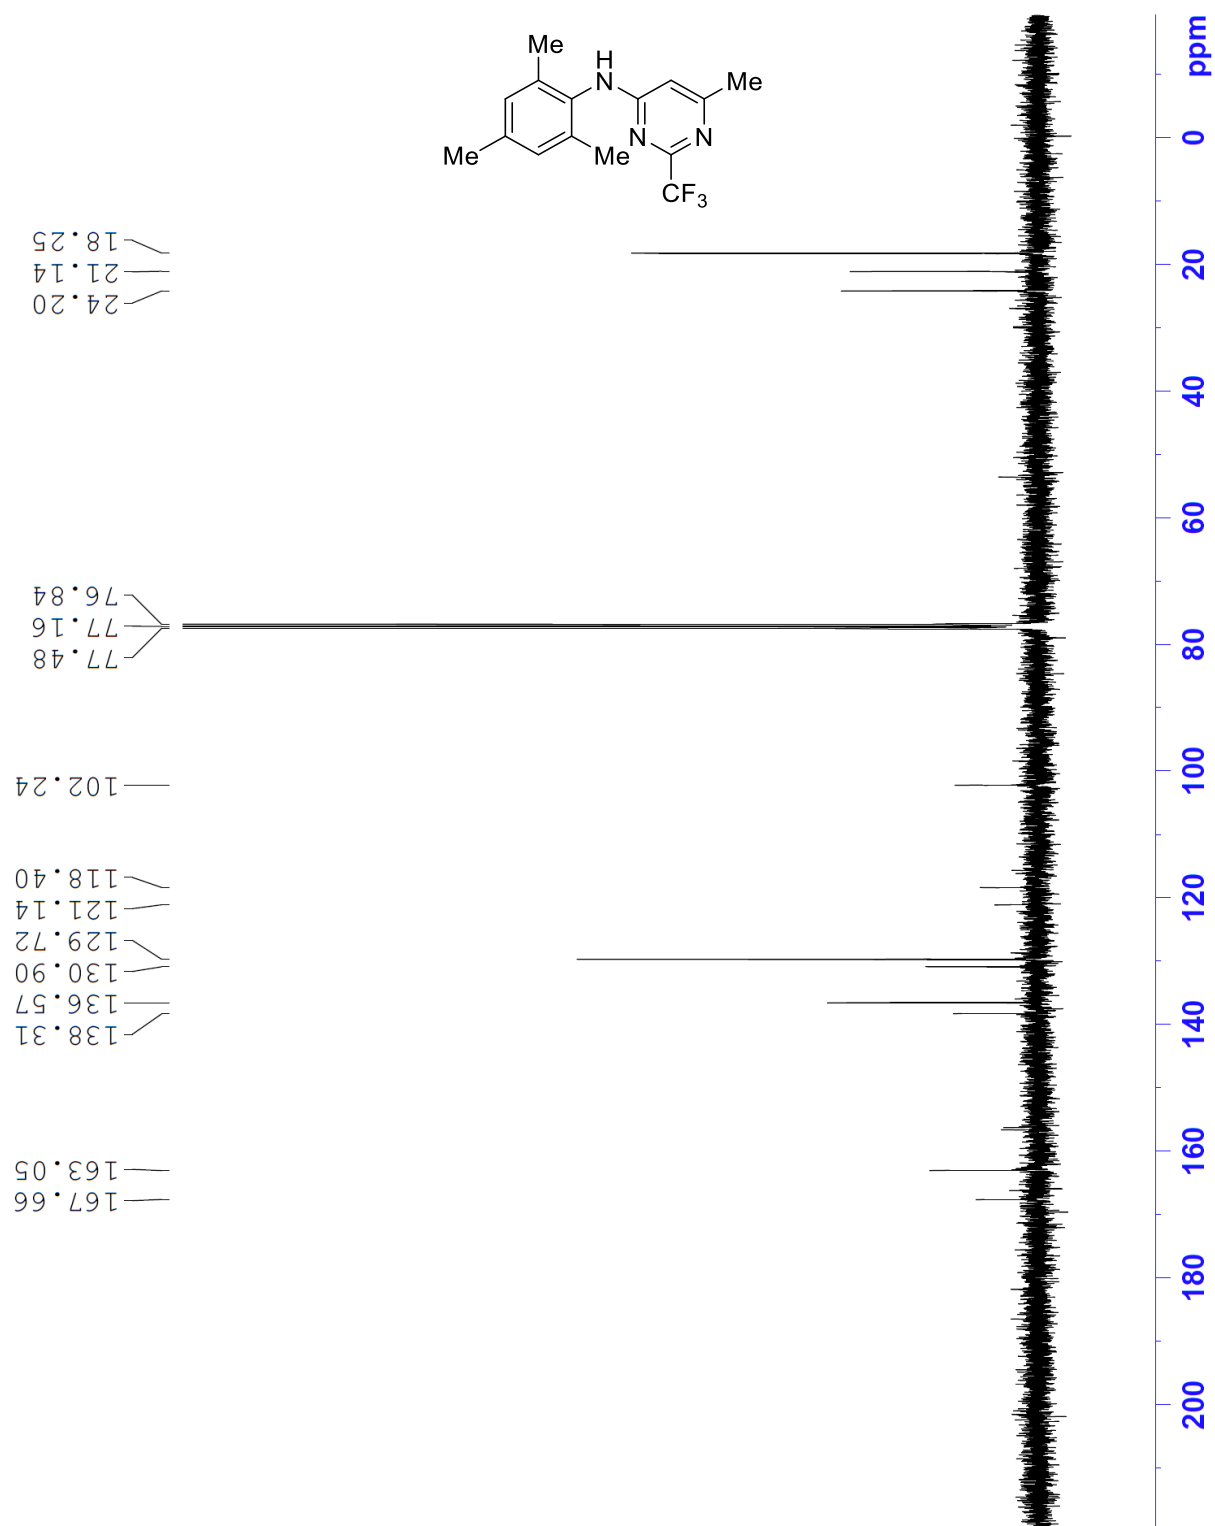



**<sup>19</sup>F NMR (376 MHz, CDCl<sub>3</sub>) of *N*-Mesityl-6-methyl-2-(trifluoromethyl)pyrimidin-4-amine (3y)**

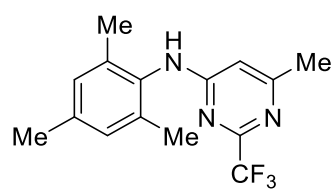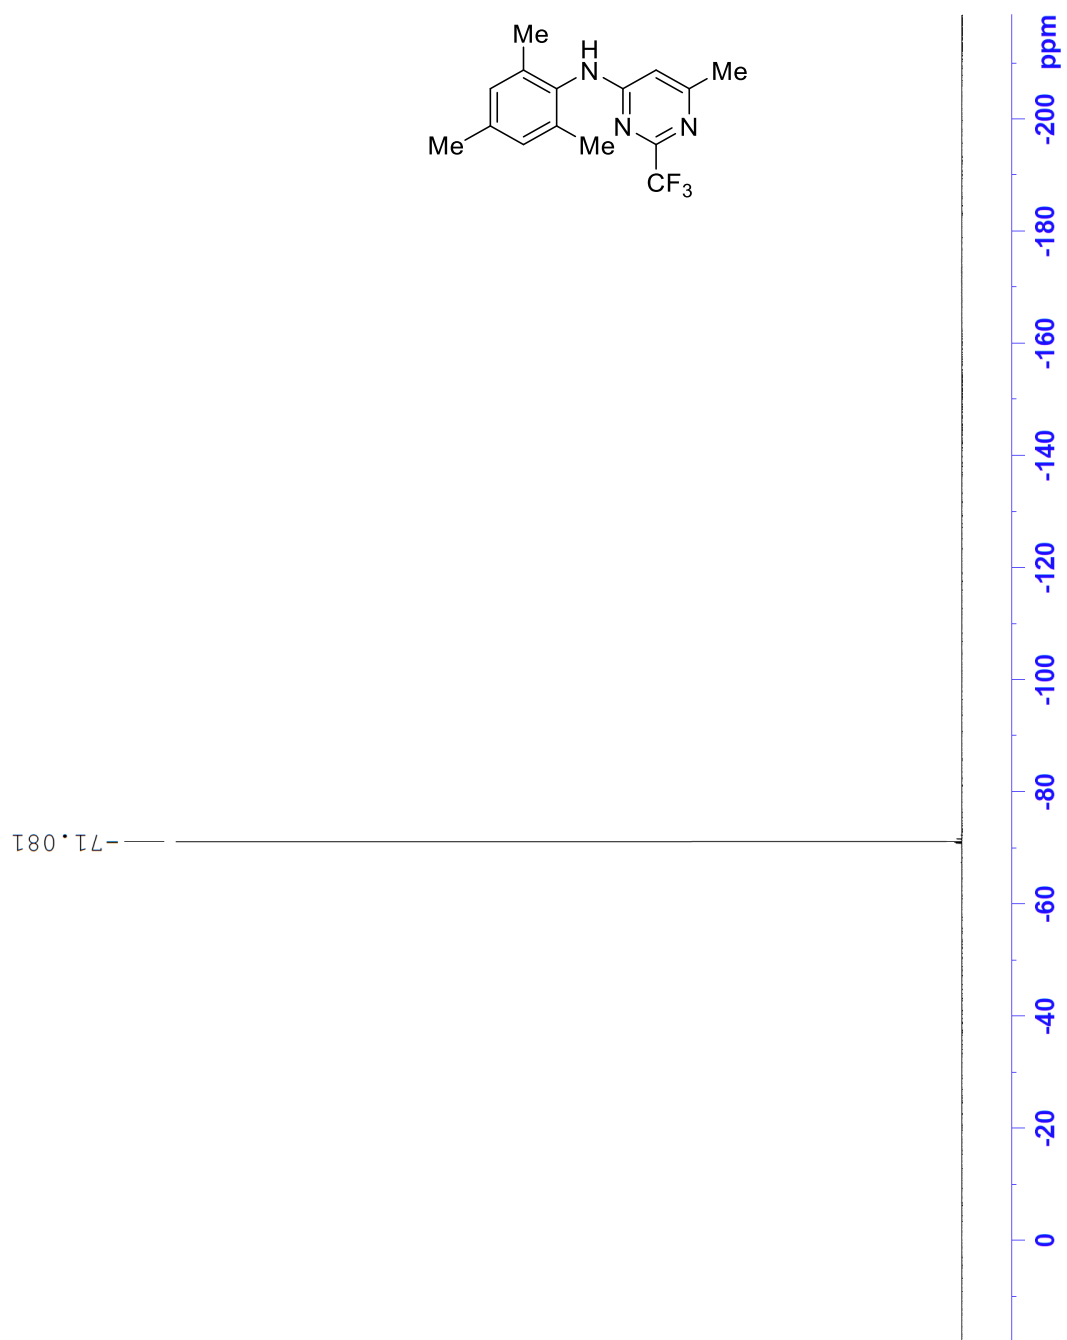

<sup>1</sup>H NMR (400 MHz, CDCl<sub>3</sub>) of *N*-(3,5-Dimethyl-[1,1'-biphenyl]-4-yl)-6-methyl-2-(trifluoromethyl)pyrimidin-4-amine (3z)

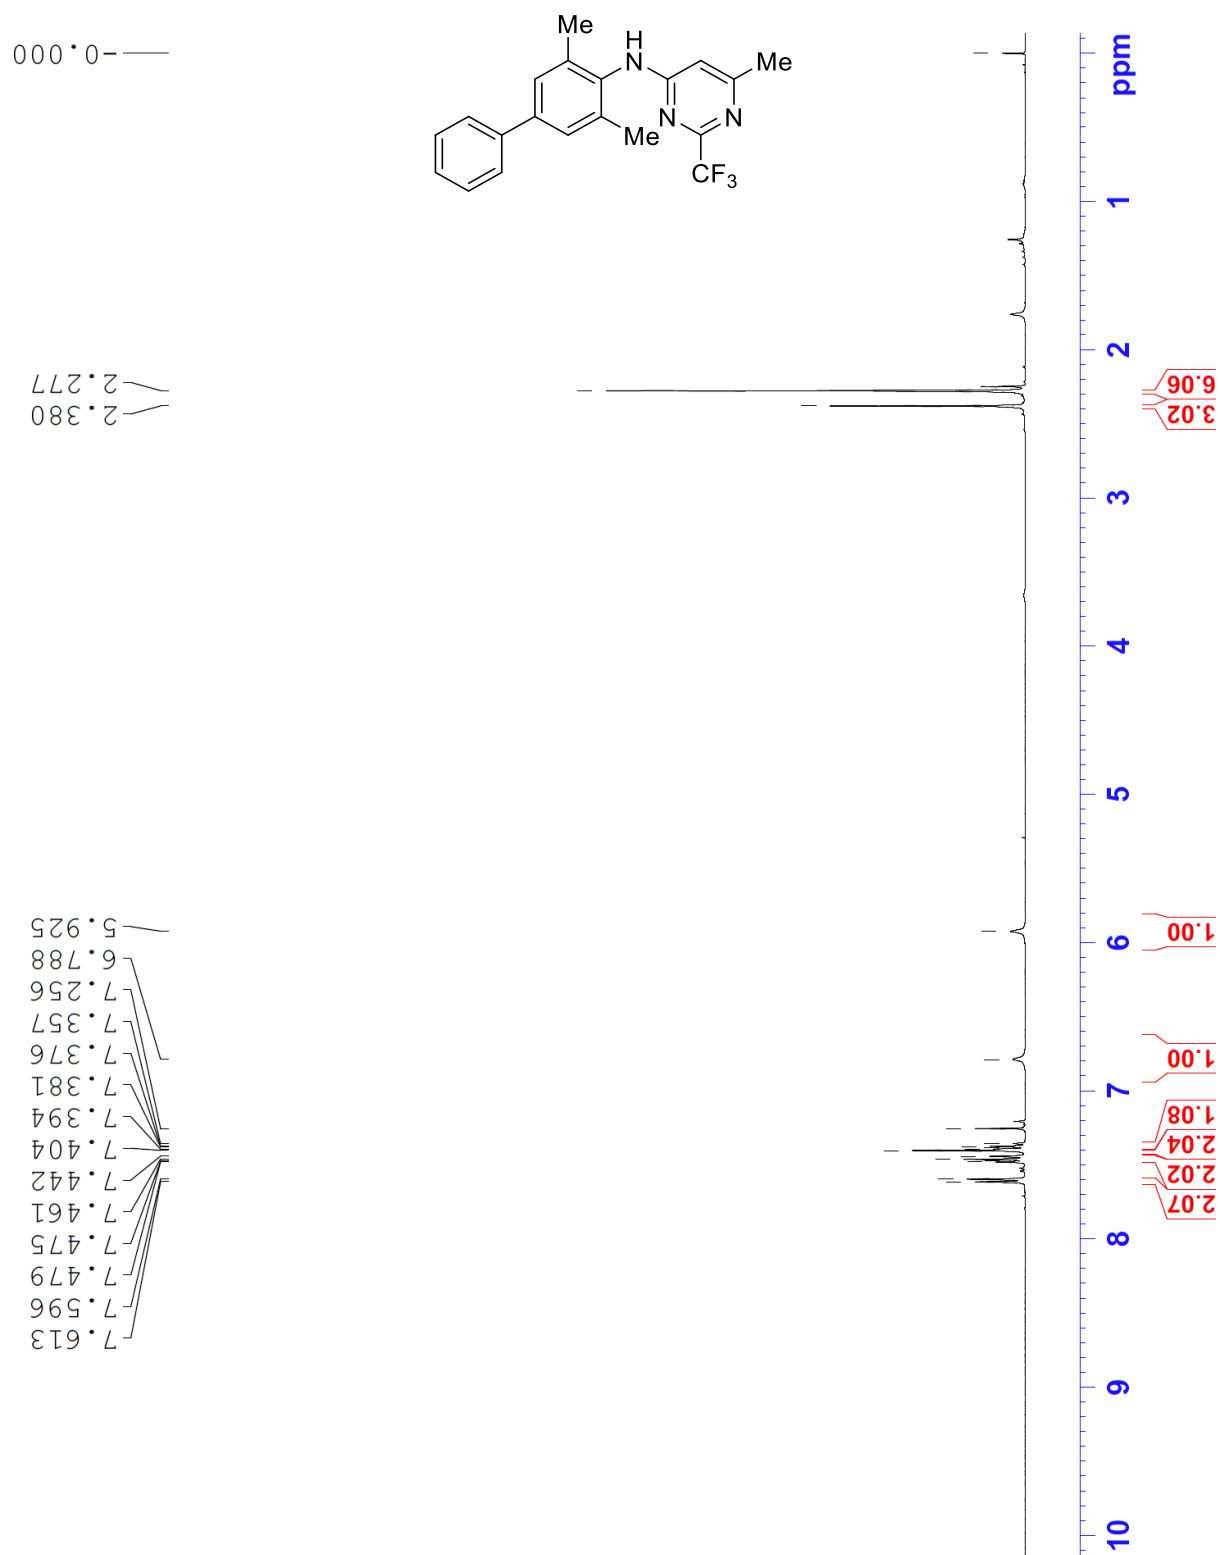

<sup>13</sup>C NMR (100.6 MHz, CDCl<sub>3</sub>) of *N*-(3,5-Dimethyl-[1,1'-biphenyl]-4-yl)-6-methyl-2-(trifluoromethyl)pyrimidin-4-amine (3z)

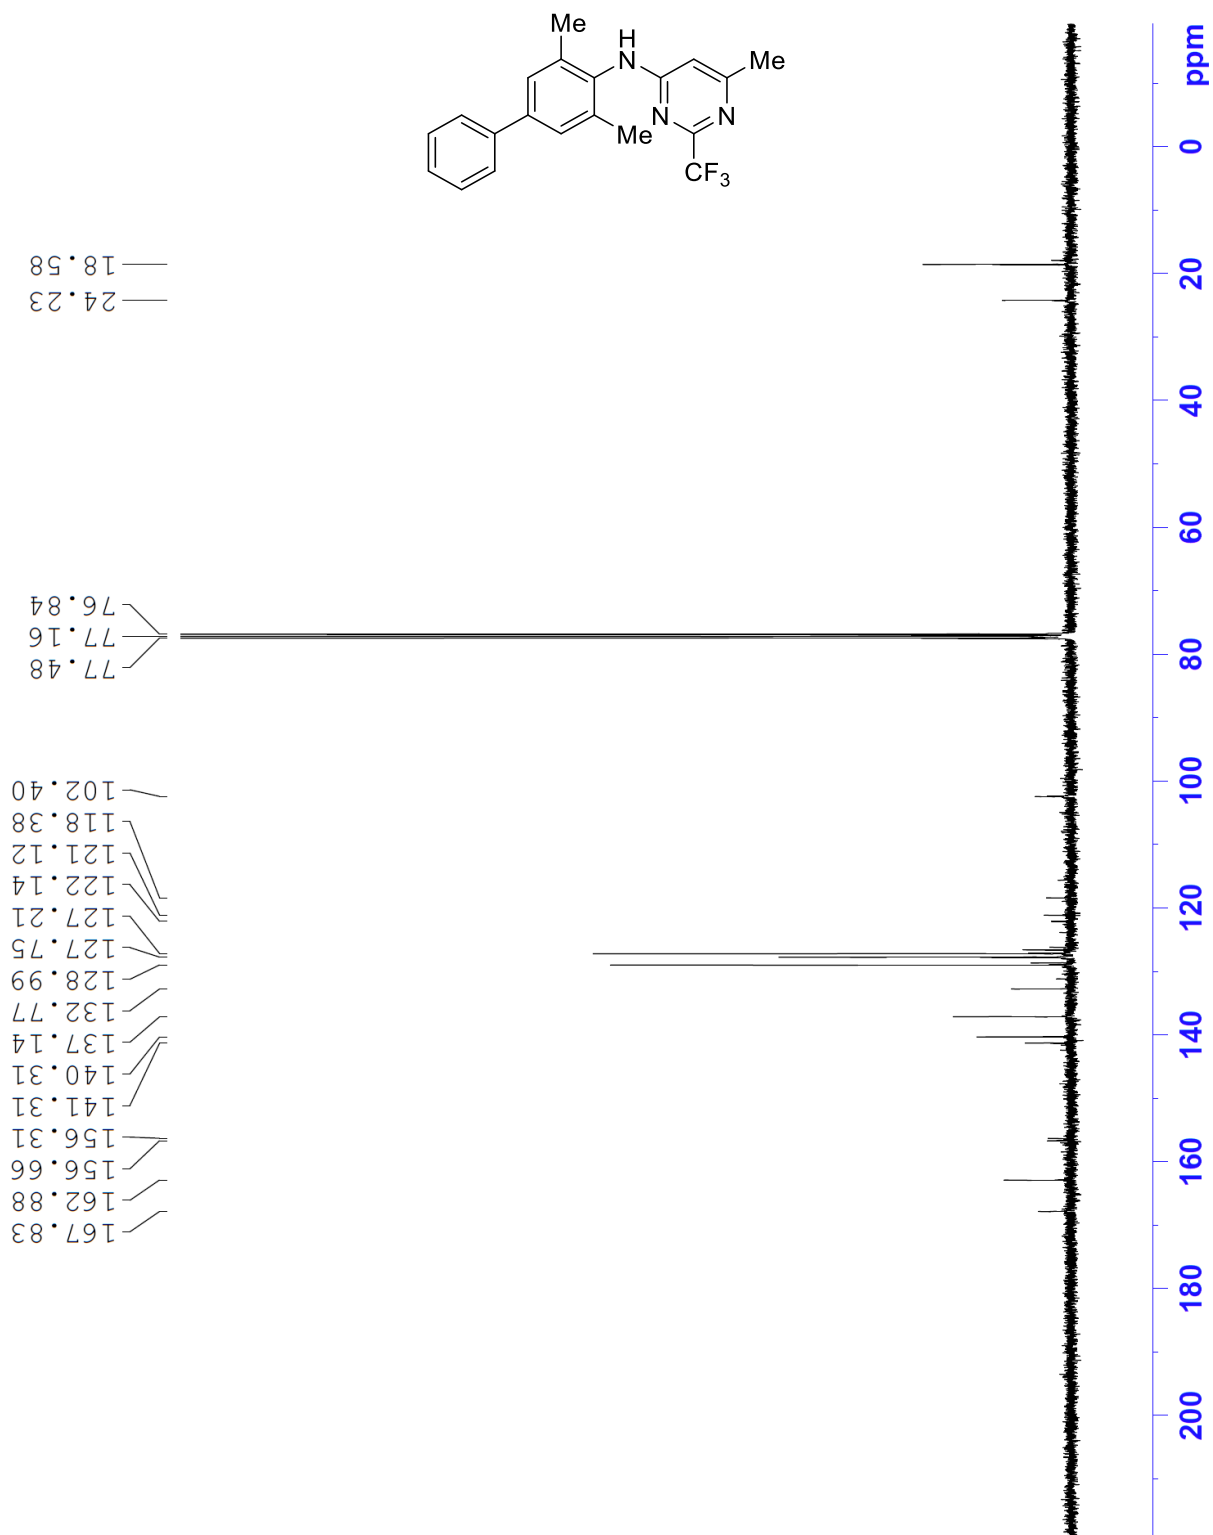

$^{19}\text{F}$  NMR (376 MHz,  $\text{CDCl}_3$ ) of *N*-(3,5-Dimethyl-[1,1'-biphenyl]-4-yl)-6-methyl-2-(trifluoromethyl)pyrimidin-4-amine (3z)

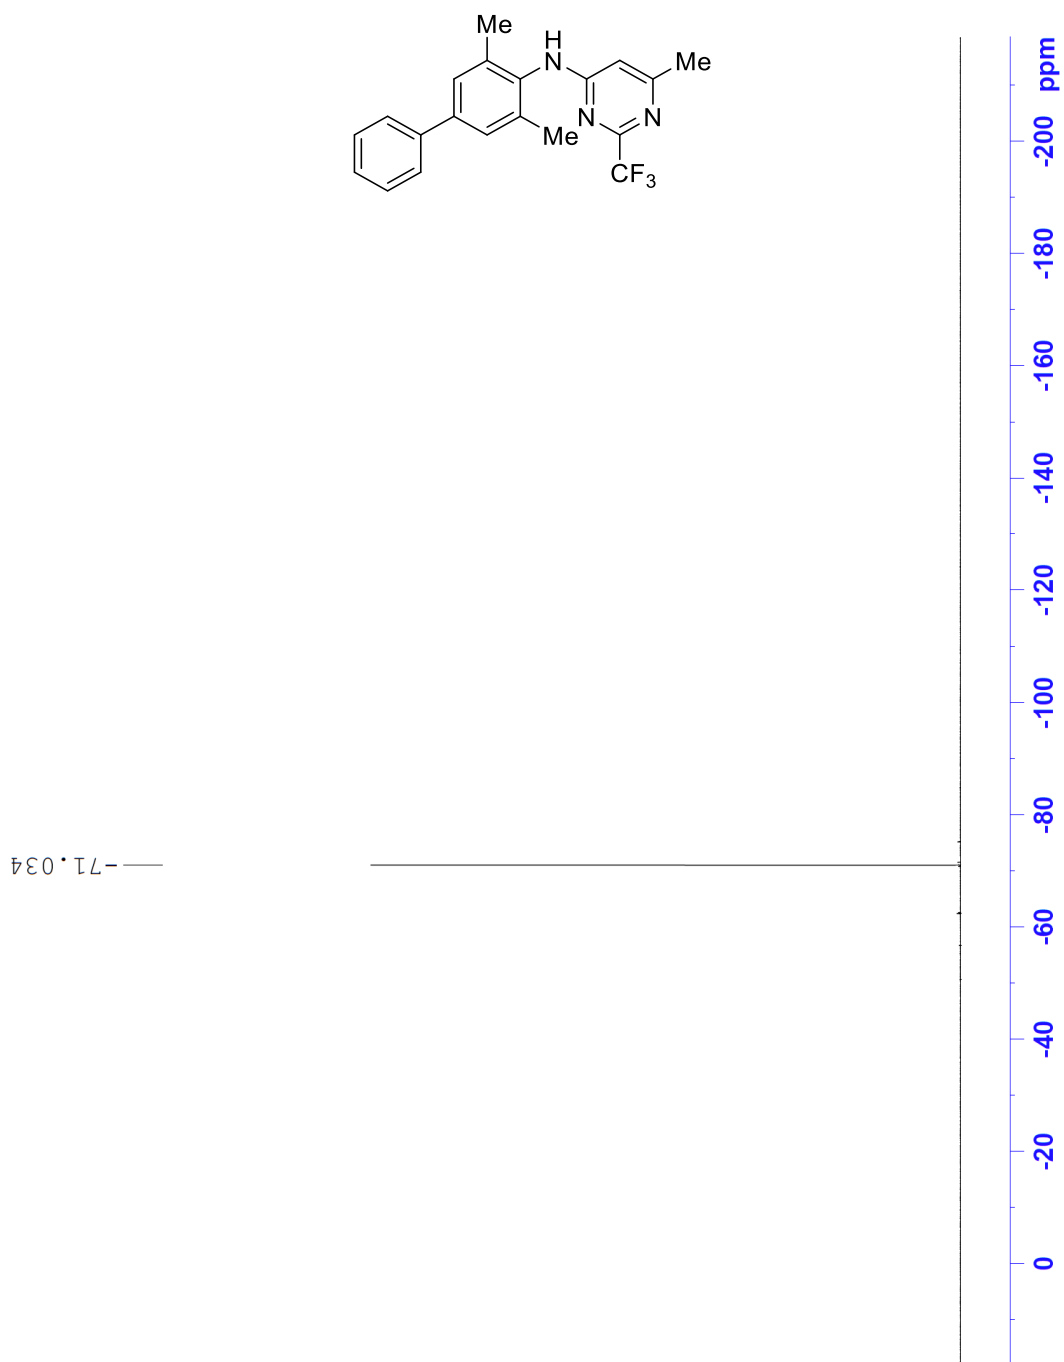

<sup>1</sup>H NMR (400 MHz, CDCl<sub>3</sub>) of 6-Methyl-N-(4'-methyl-[1,1'-biphenyl]-4-yl)-2-(perfluoroethyl)pyrimidin-4-amine (3aa)

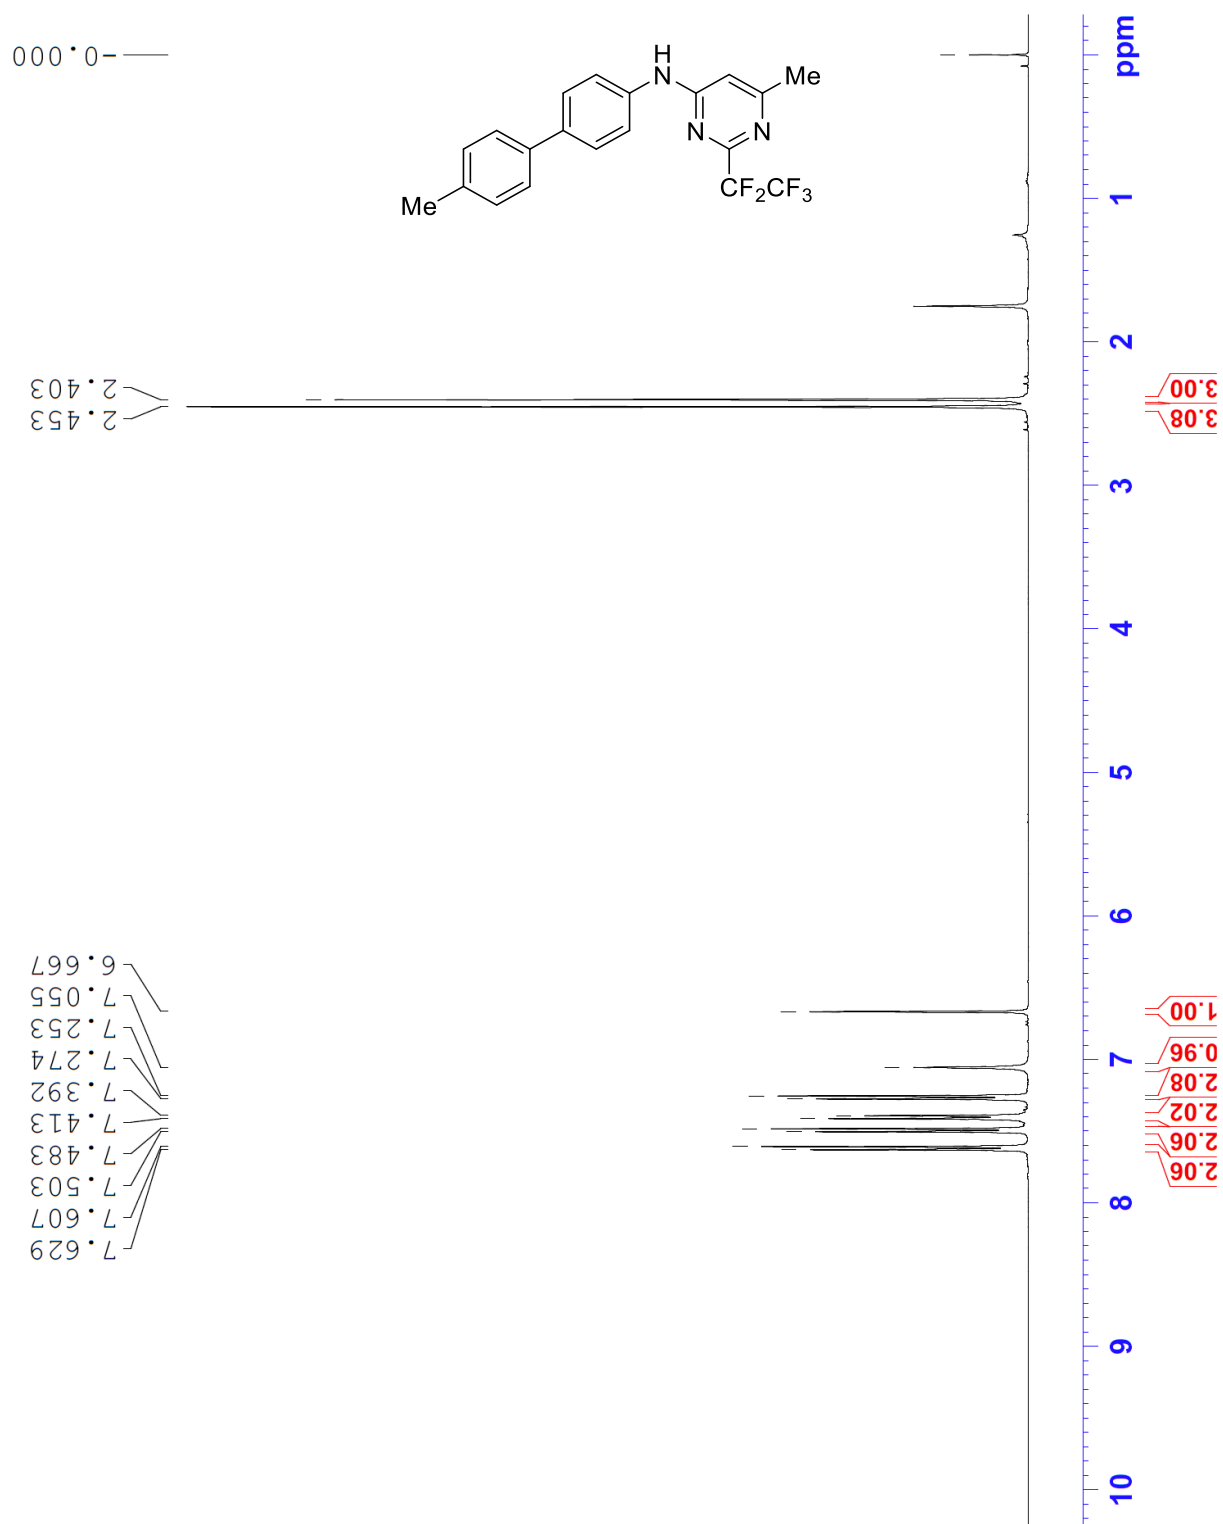

<sup>13</sup>C NMR (100.6 MHz, CDCl<sub>3</sub>) of 6-Methyl-N-(4'-methyl-[1,1'-biphenyl]-4-yl)-2-(perfluoroethyl)pyrimidin-4-amine (3aa)

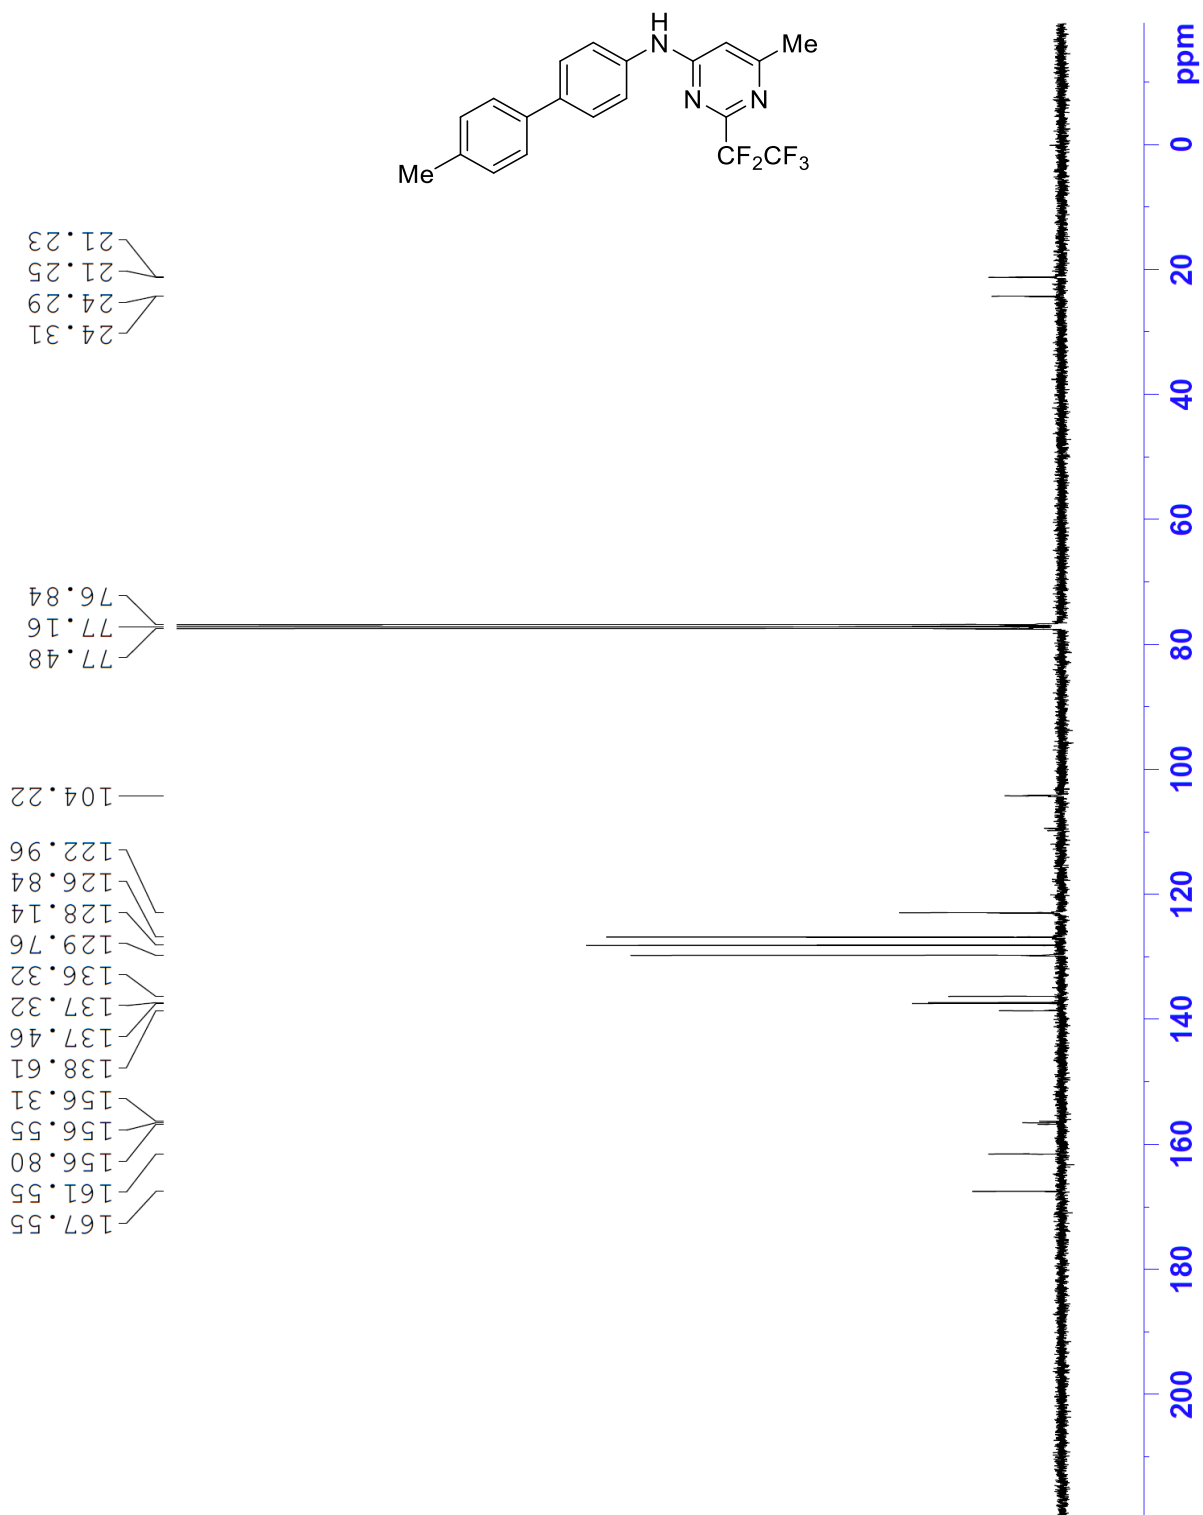

<sup>19</sup>F NMR (376 MHz, CDCl<sub>3</sub>) of 6-Methyl-N-(4'-methyl-[1,1'-biphenyl]-4-yl)-2-(perfluoroethyl)pyrimidin-4-amine (3aa)

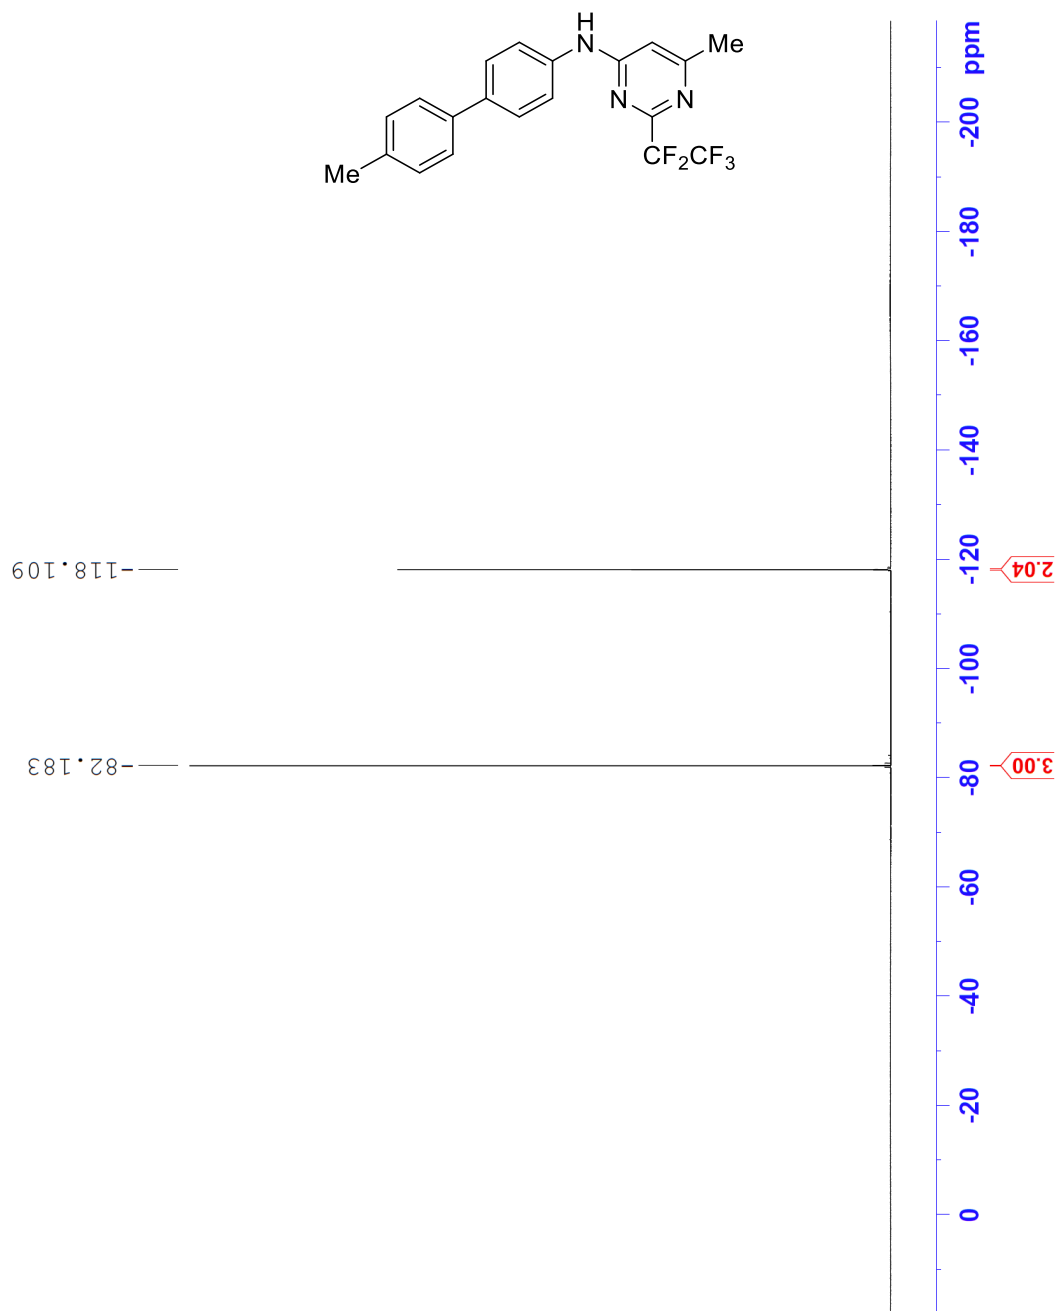

<sup>1</sup>H NMR (400 MHz, CDCl<sub>3</sub>) of 3-Methyl-8-phenyl-1-(trifluoromethyl)benzo[4,5]imidazo[1,2-*c*]pyrimidine (3a')

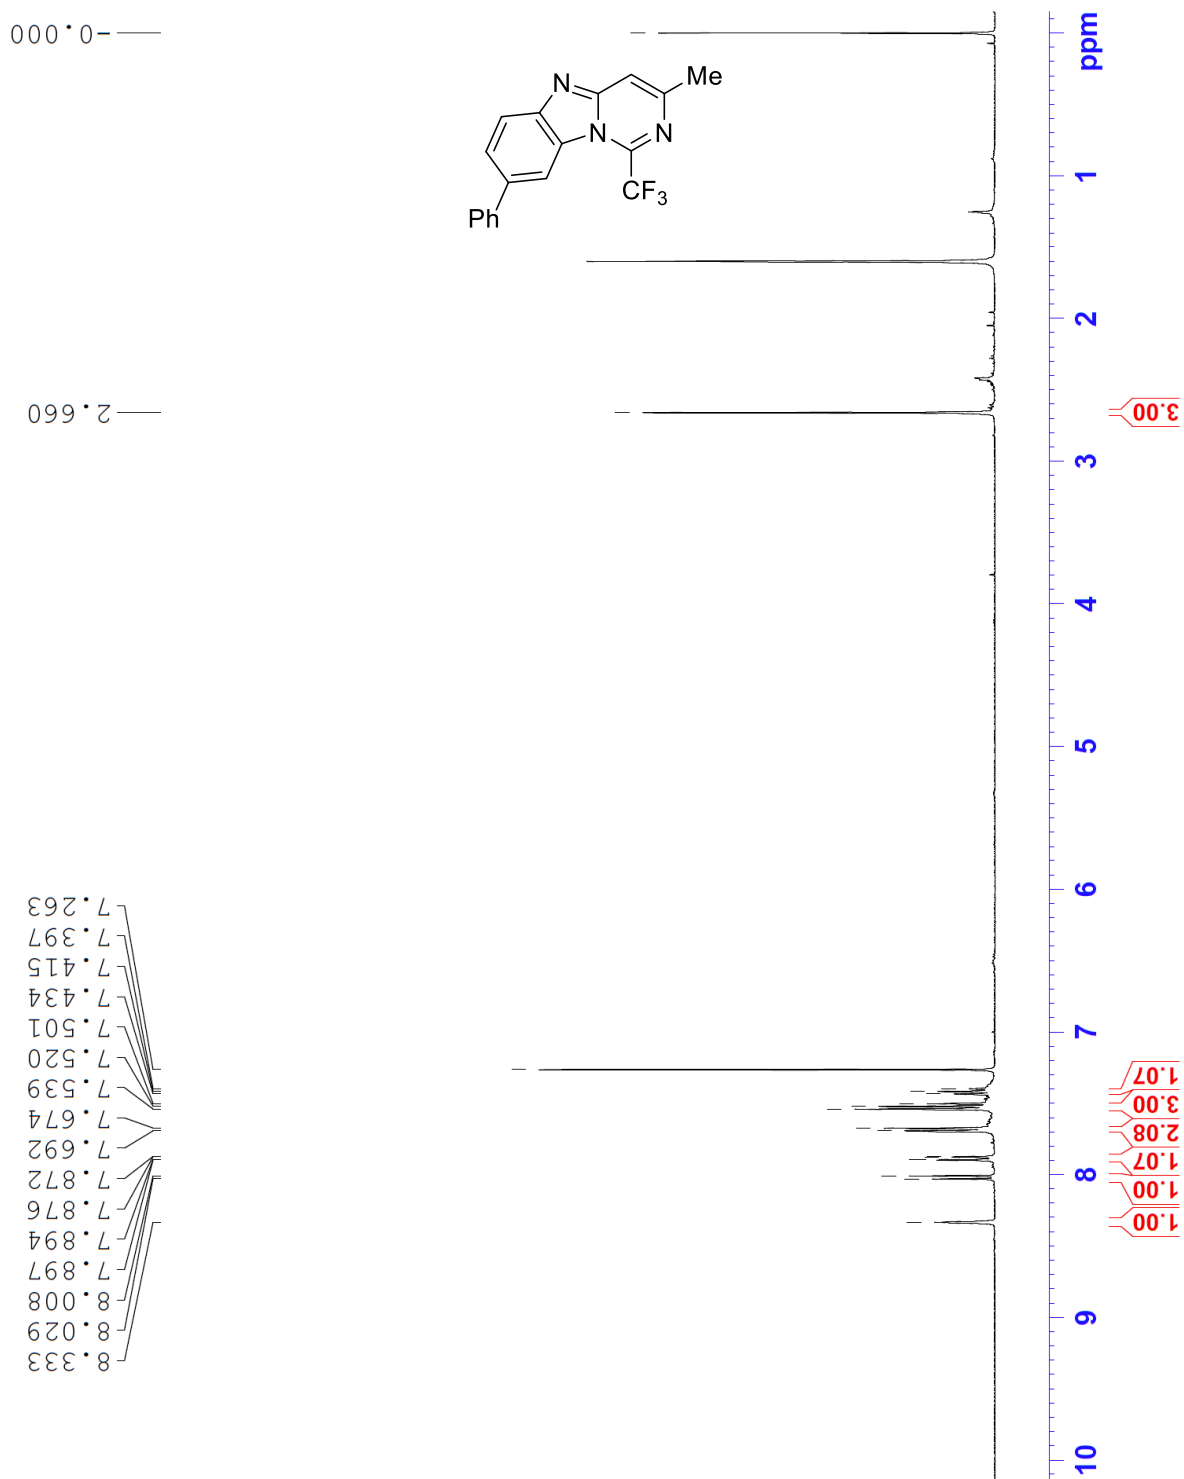



**<sup>13</sup>C NMR (150.9 MHz, CDCl<sub>3</sub>) of 3-Methyl-8-phenyl-1-(trifluoromethyl)benzo[4,5]imidazo[1,2-*c*]pyrimidine (3a')**

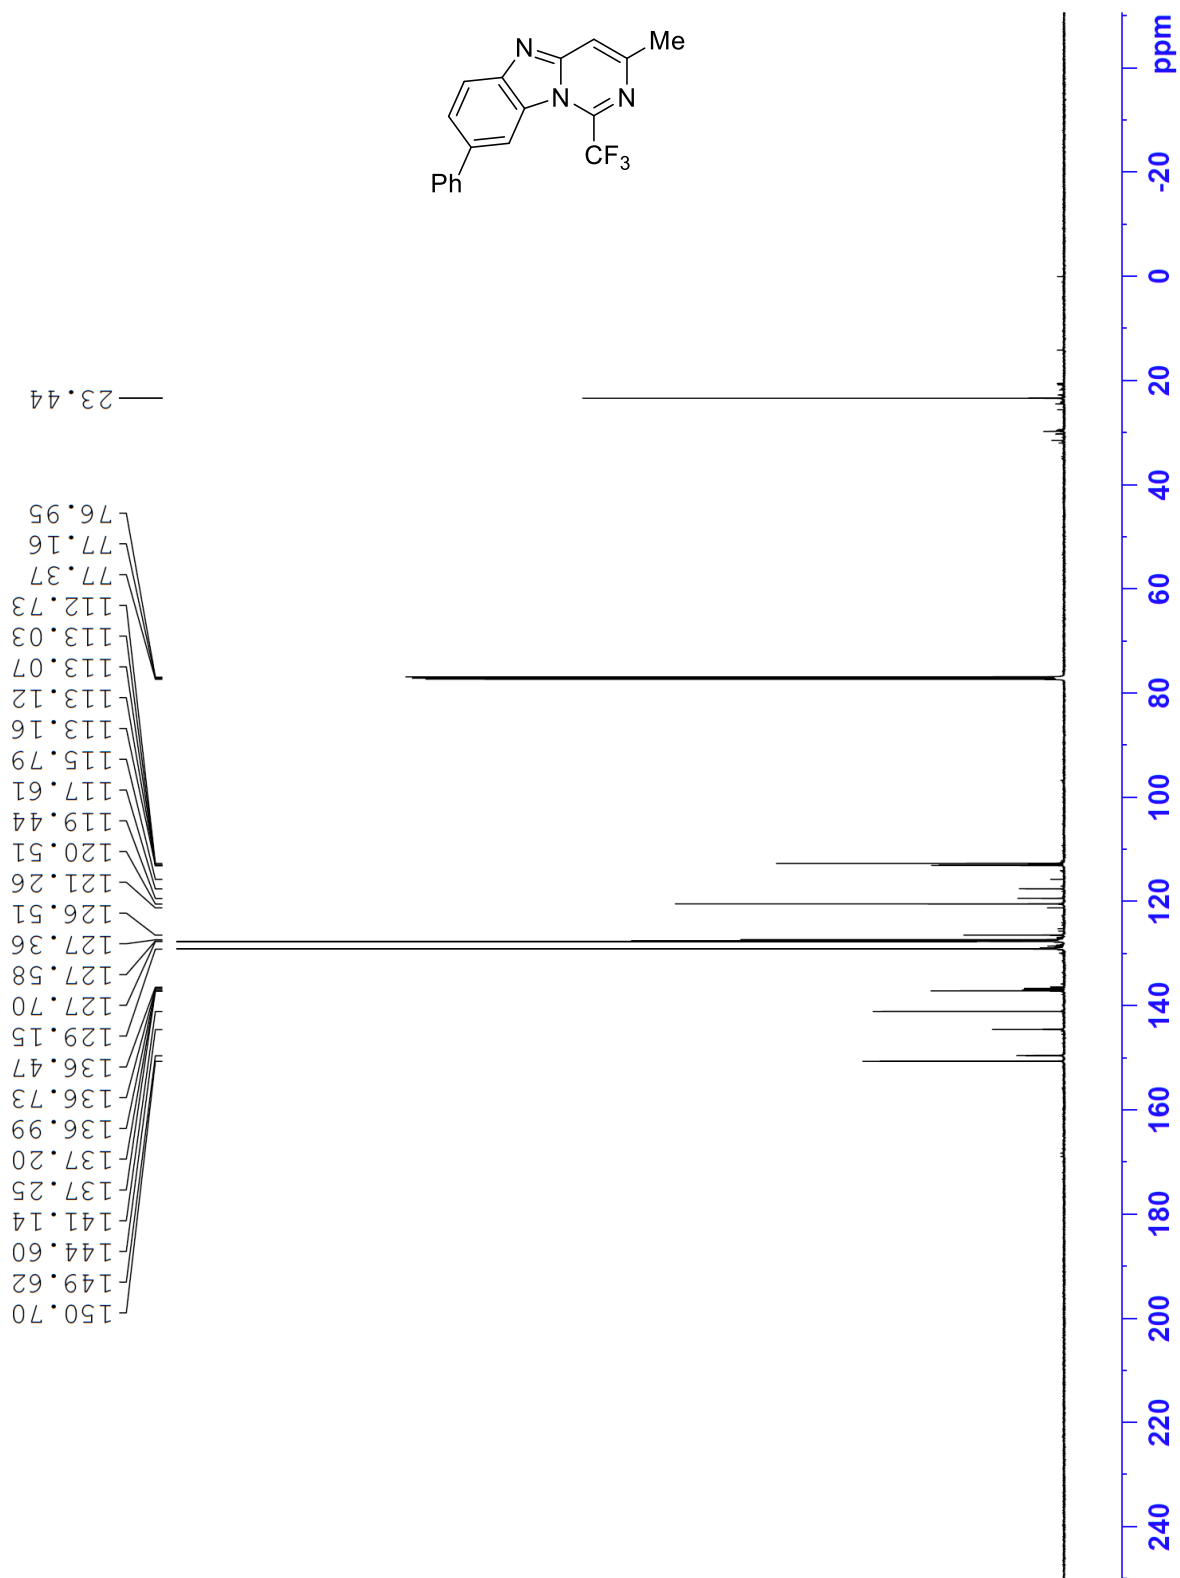

<sup>19</sup>F NMR (376 MHz, CDCl<sub>3</sub>) of 3-Methyl-8-phenyl-1-(trifluoromethyl)benzo[4,5]imidazo[1,2-*c*]pyrimidine (3a')

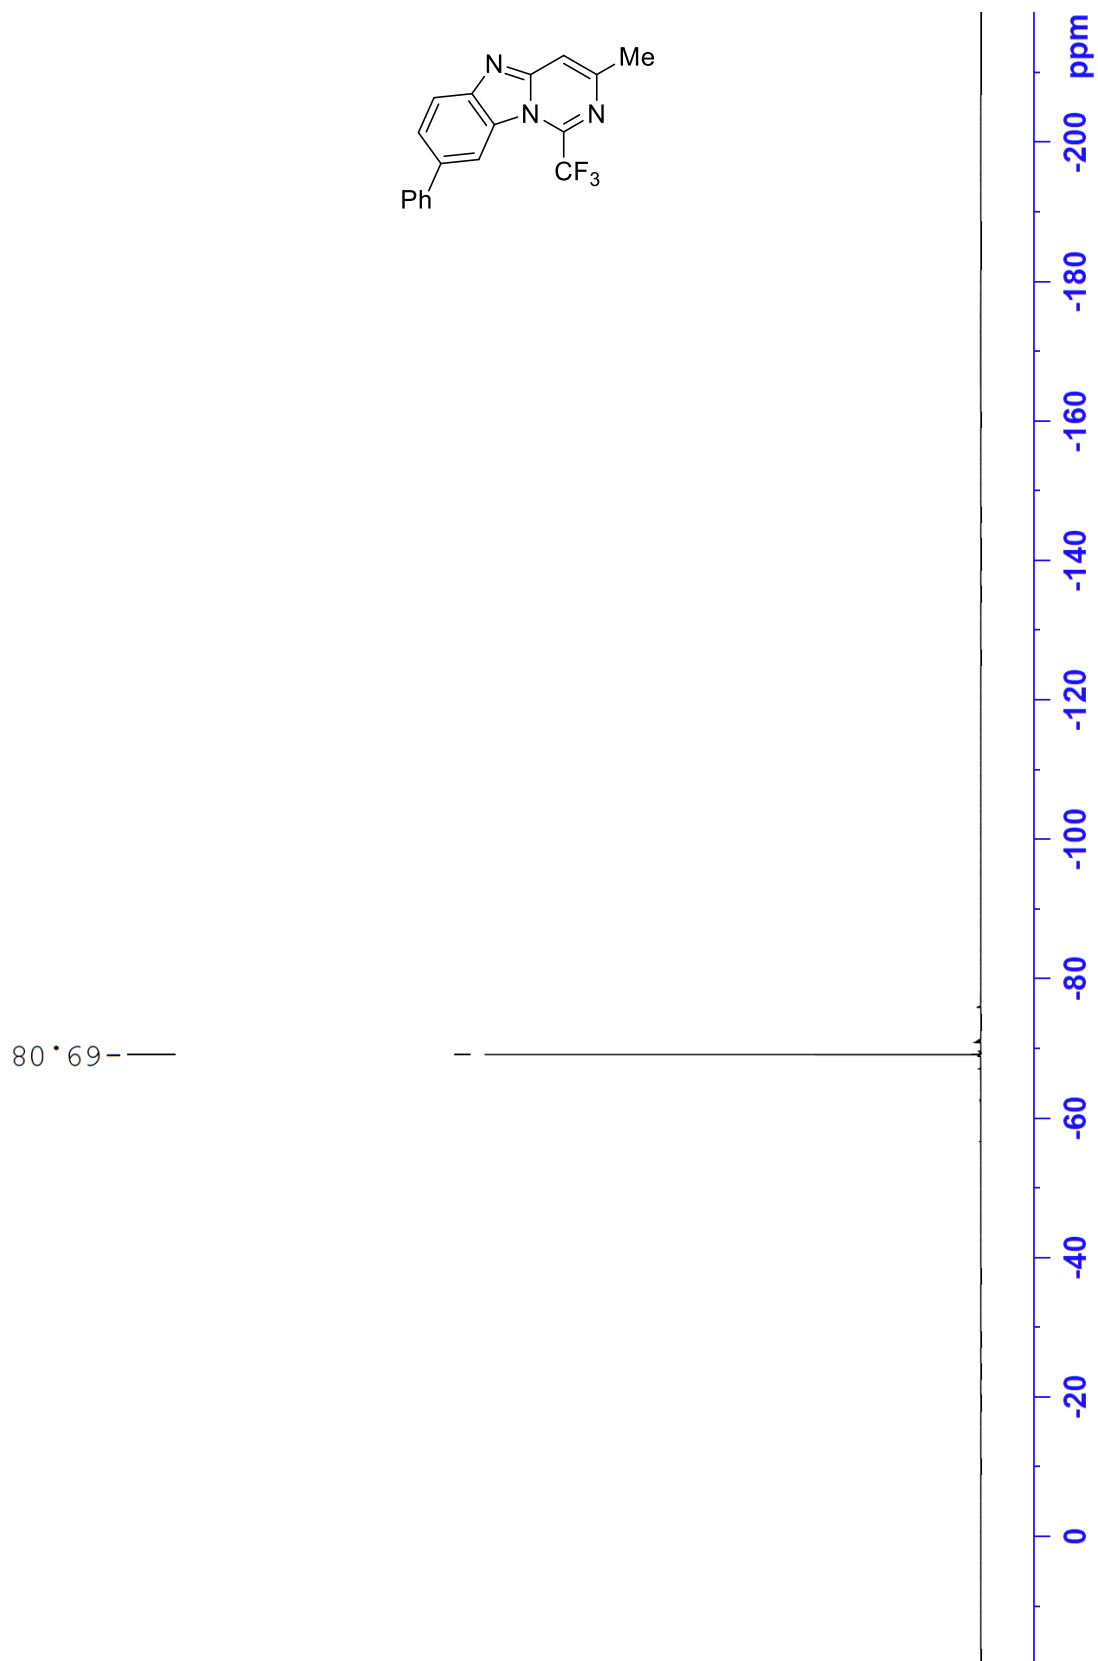

<sup>1</sup>H NMR (400 MHz, CDCl<sub>3</sub>) of (*E*)-3-Amino-2,4-dimethoxybut-2-enitrile (4)

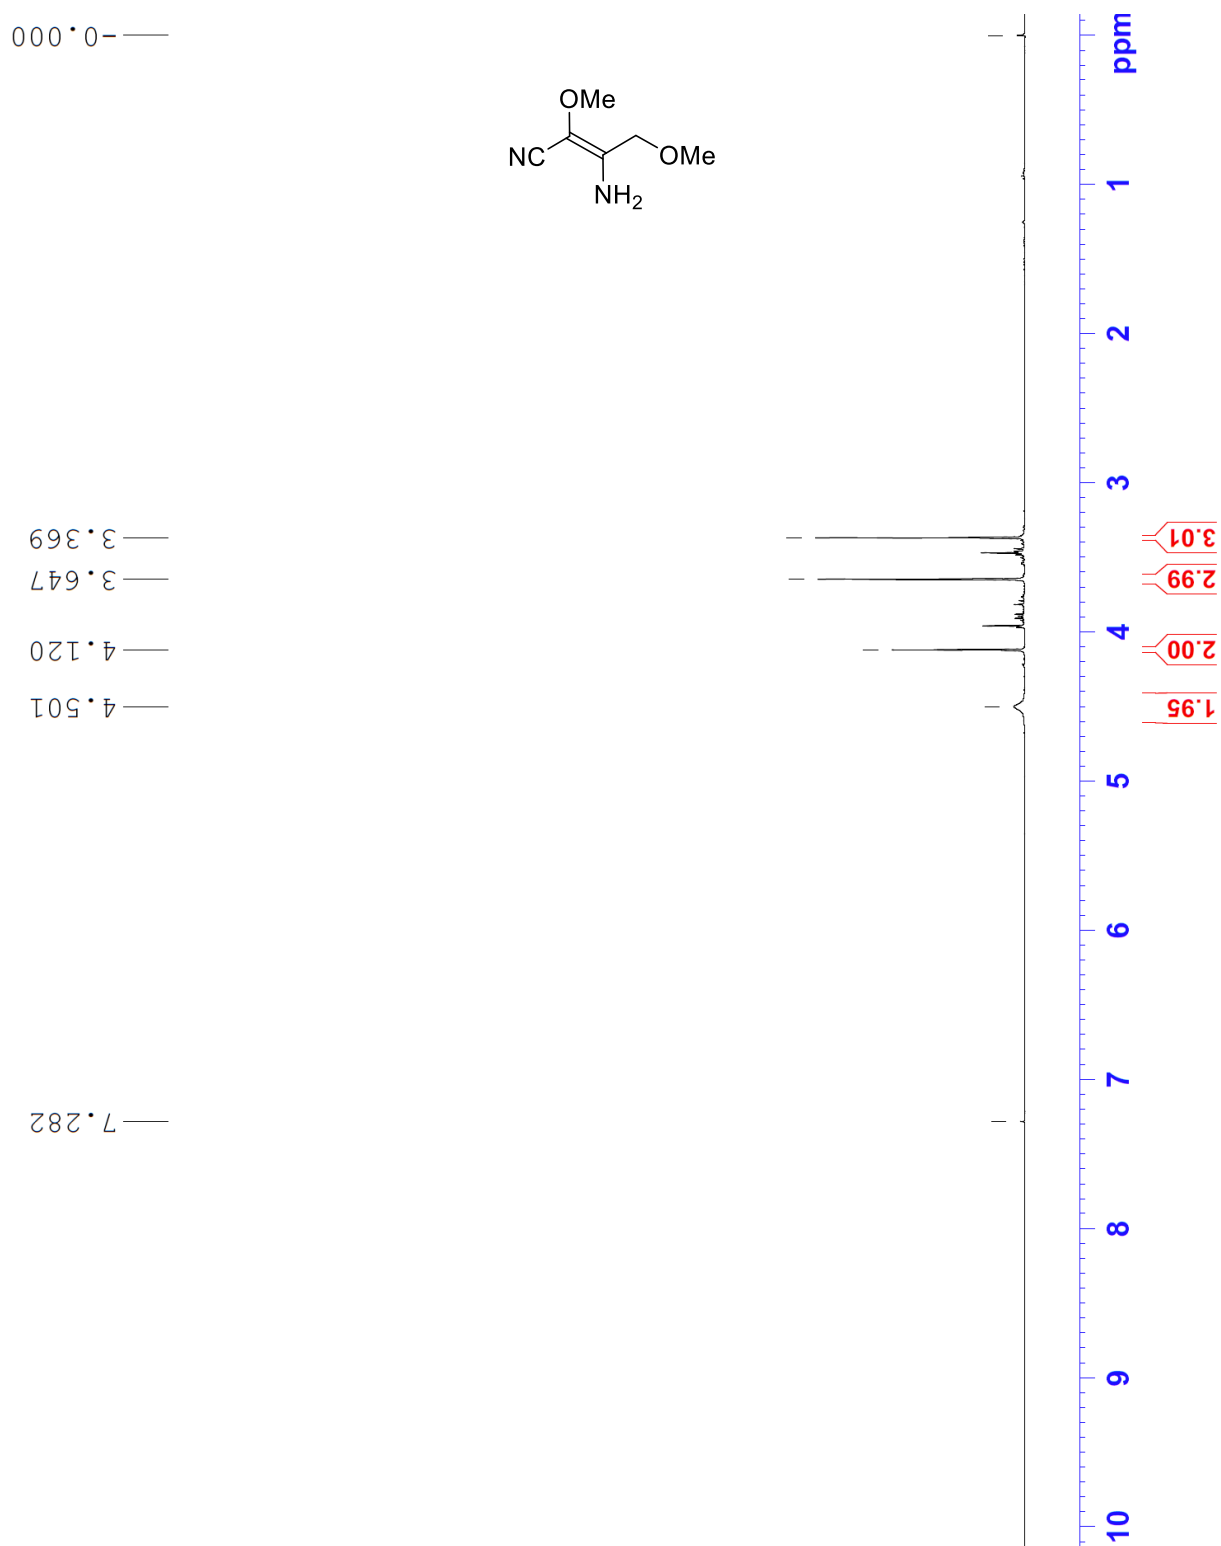

$^{13}\text{C}$  NMR (100.6 MHz,  $\text{CDCl}_3$ ) of (*E*)-3-Amino-2,4-dimethoxybut-2-enitrile (4)

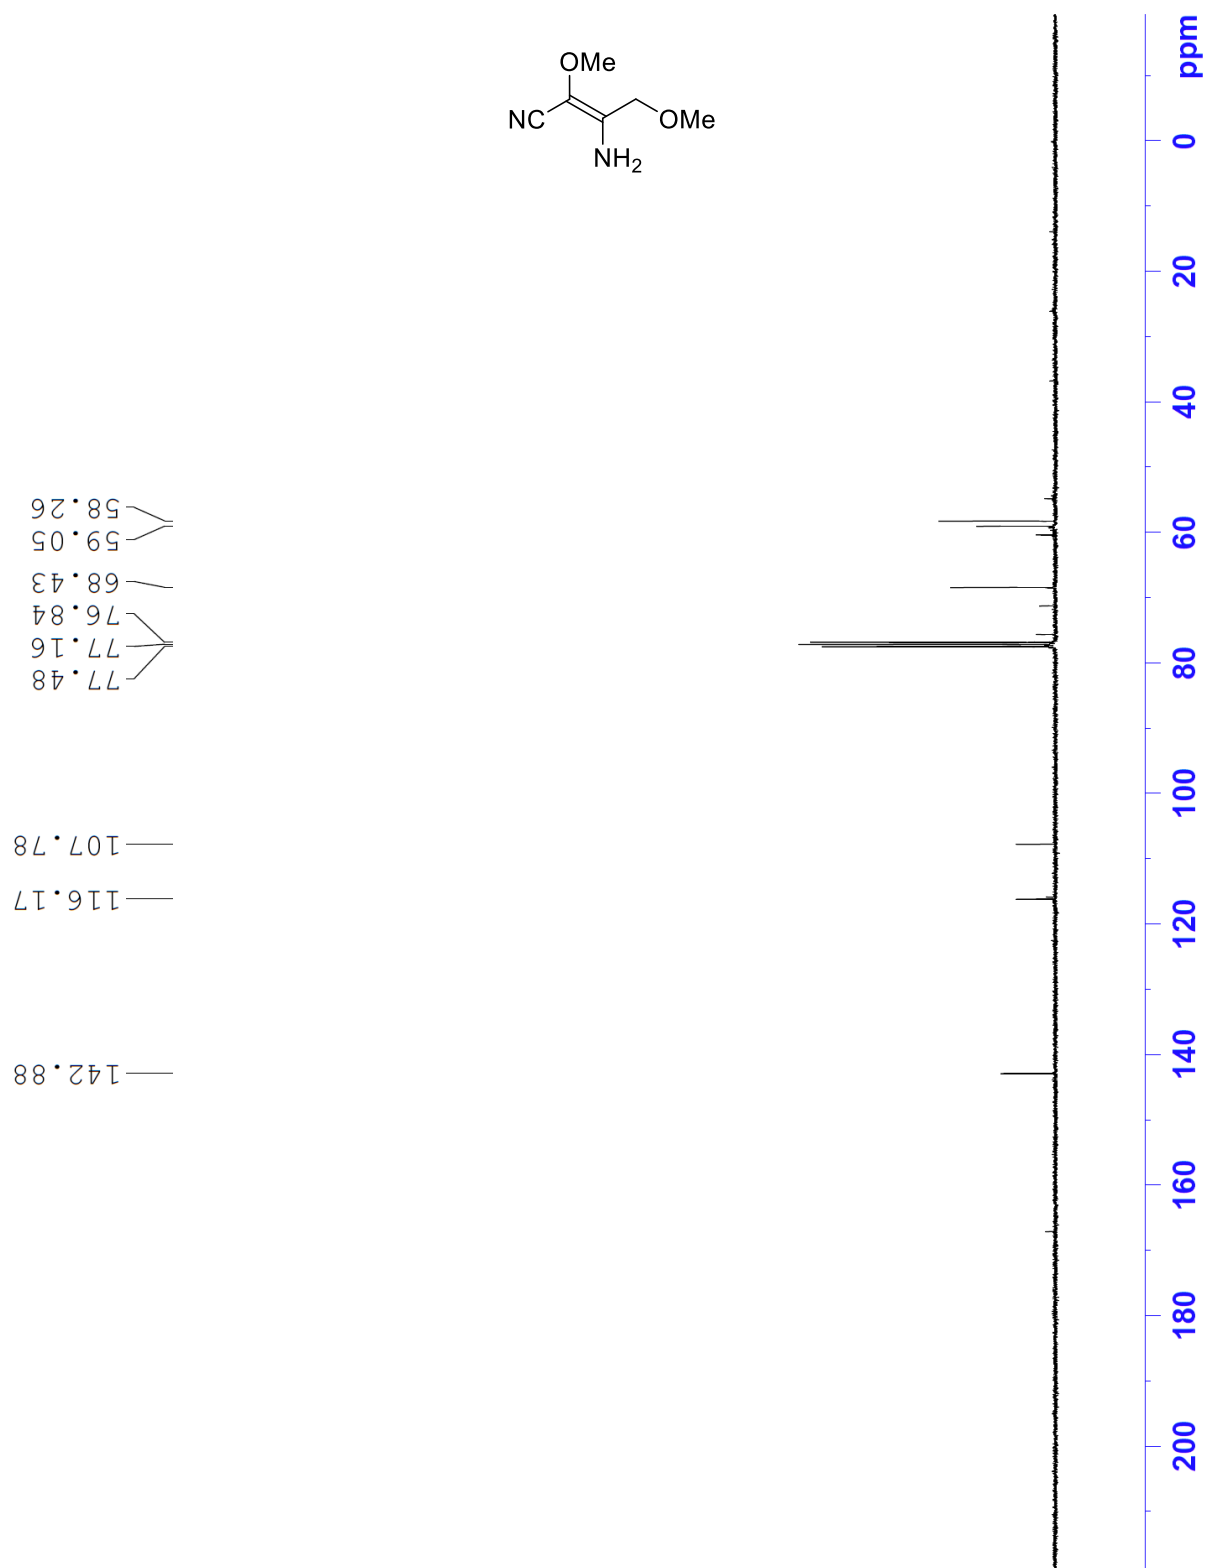

Supplement: d0cc02398a1.pdf [file d0cc02398a1.pdf]
